# Supplementary material
Source: PubMed Central journal article supplement (PMC4056829)

# Supporting Information

## **Thermodynamic and Structural Effects of Macrocyclic Constraints in Protein-Ligand Interactions**

*John E. DeLorbe, John H. Clements, Benjamin B. Whiddon, Stephen F. Martin\**

Contribution from the Department of Chemistry and Biochemistry,  
The Institute of Cellular and Molecular Biology, and  
Texas Institute of Drug and Diagnostic Development

The University of Texas, Austin, Texas 78712, USA  
sfmartin@mail.utexas.edu

## MATERIALS AND EXPERIMENTAL METHODS

**General for Synthetic Experiments.** Solvents and reagents were reagent grade and were used without purification, unless otherwise noted. *N,N*-dimethylformamide (DMF) was dried by passage through two columns of activated molecular sieves. Dichloromethane (CH<sub>2</sub>Cl<sub>2</sub>), triethylamine (Et<sub>3</sub>N), 2,6-lutidine, and *N*-methylmorpholine (NMM) were distilled from calcium hydride. Removal of solvent or concentration under reduced pressure was performed using a rotary evaporator at 25–30 °C. Flash chromatography was performed with the indicated solvents and Merck 250-400 mesh silica gel. HPLC was conducted using a binary solvent system, where solvent system A was 0.1% aqueous TFA and solvent system B was 0.1% TFA in acetonitrile, with a C18 column (10 mm particle size, 300 Å pore size), 22 mm diameter × 250 mm (flow rate of 8 mL/min), being used for preparative work and a C18 column (10 mm particle size, 300 Å pore size), 4.6 mm diameter × 250 (flow rate of 1 mL/min), being used for analytical work. Analytical TLC was performed with Merck-60 TLC plates and the indicated solvents.

Melting points were determined on a melting point apparatus and are uncorrected. Proton (<sup>1</sup>H) nuclear magnetic resonance (NMR) spectra were obtained at the indicated field strength as solutions in the indicated solvent. Chemical shifts are reported in parts per million (ppm, δ) referenced relative to the center of the residual <sup>1</sup>H resonance of the solvent (CD<sub>3</sub>OD: 3.30 ppm; DMSO-*d*<sub>6</sub>: 2.49 ppm; D<sub>2</sub>O: 4.67 ppm; CDCl<sub>3</sub>: 7.24 ppm). Coupling constants are reported in hertz (Hz). Splitting patterns are designated as: s = singlet; d = doublet; dd = doublet of doublet; ddd = doublet of doublet of doublets; t = triplet; q = quartet; p = pentuplet; hep = heptet; m = multiplet; comp = overlapping multiplets of non-magnetically equivalent protons; br = broad; app = apparent. Carbon 13 (<sup>13</sup>C) NMR spectra were obtained at the field indicated strength as solutions in the indicated solvent. Resonances are reported in ppm referenced from the center of the <sup>13</sup>C multiplet of the solvent (CD<sub>3</sub>OD: 49.0 ppm; DMSO-*d*<sub>6</sub>: 39.5 ppm, CDCl<sub>3</sub>: 77.0 ppm). Spectra taken in D<sub>2</sub>O were referenced utilizing an external standard. Isothermal titration calorimetry was performed as previously described.<sup>1</sup>

**General procedure for the coupling of amino acids and peptides. Preparation of 9, 11, 15, 17, 19, 22, 26, 28, 29, 31, 32, 33, 35, 37, 39, 42, 44, 46, 48, 50.**

**Method A:** *N*-Methylmorpholine (NMM) (42 mg, 46 μL, 0.417 mmol) was added to a solution of *N*-protected amino acid (0.139 mmol) and *C*-protected amino acid (0.153 mmol) in DMF

(2 mL) at  $-10\text{ }^{\circ}\text{C}$ . 1-(3-(Dimethylamino)propyl)-3-ethylcarbodiimide hydrochloride (EDCI) (30 mg, 0.153 mmol) and 1-hydroxybenzotriazole hydrate (HOBt) (38 mg, 0.278 mmol) were added, and the reaction was warmed to room temperature over 2 h and stirring continued at room temperature for 15 h. The reaction was concentrated to dryness under reduced pressure. The residue was triturated with saturated  $\text{NaHCO}_3$  (5 mL), and the resultant solid was isolated by vacuum filtration and washed sequentially with  $\text{H}_2\text{O}$  (3 mL), 1 M  $\text{HCl}$  (3 x 3 mL) and  $\text{H}_2\text{O}$  (5 mL). If the material was not  $>90\%$  pure by  $^1\text{H}$  NMR, the crude product was purified using flash chromatography or preparative RP HPLC using a binary gradient of solvents, A and B (given).

**Method B:** NMM (464 mg, 505  $\mu\text{L}$ , 4.59 mmol) was added to a solution of *N*-protected amino acid (1.53 mmol) and *C*-protected amino acid (1.68 mmol) in DMF (15 mL) at  $-10\text{ }^{\circ}\text{C}$ . EDCI (323 mg, 1.68 mmol) and HOBt (413 mg, 3.06 mmol) were added, the mixture was warmed to room temperature over 2 h and stirring continued for 14 h. The mixture was concentrated to dryness under reduced pressure. Saturated  $\text{NaHCO}_3$  (15 mL) was added, and the aqueous phase was extracted with  $\text{CH}_2\text{Cl}_2$  (3 x 15 mL). The combined organics were washed with 1 M  $\text{HCl}$  (3 x 15 mL),  $\text{H}_2\text{O}$  (25 mL), dried ( $\text{Na}_2\text{SO}_4$ ) and concentrated to dryness under reduced pressure. If the material was not  $>90\%$  pure by  $^1\text{H}$  NMR, the crude product was purified using flash chromatography or preparative RP HPLC using a binary gradient of solvents, A and B (given).

**Method C:** A solution of *N*-protected amino acid (51 mg, 0.149 mmol) and *C*-protected amino acid (72 mg, 0.149 mmol) in DMF (2.0 mL) was cooled to  $-10\text{ }^{\circ}\text{C}$ , whereupon 2,6-lutidine (48 mg, 0.446 mmol, 52  $\mu\text{L}$ ) and *O*-(7-azabenzotriazol-1-yl)-1,1,3,3-tetramethyluronium hexafluorophosphate (HATU) (56 mg, 0.149 mmol) were added. The reaction was warmed to room temperature over 2 h, and stirring was continued at room temperature for 15 h. The reaction was concentrated to dryness under reduced pressure. The residue was triturated with saturated  $\text{NaHCO}_3$  (5 mL), and the resultant solid was isolated by vacuum filtration and washed sequentially with  $\text{H}_2\text{O}$  (3 mL), 1 M  $\text{HCl}$  (3 x 3 mL) and  $\text{H}_2\text{O}$  (5 mL) to yield. If the material was not  $>90\%$  pure by  $^1\text{H}$  NMR, the crude product was purified using flash chromatography or preparative RP HPLC using a binary gradient of solvents, A and B (given).

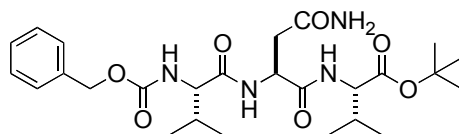

15

**(*N*-Cbz-valyl)-aspargyl-valyl-O<sup>t</sup>Bu (15).** Prepared from Cbz-Val and H<sub>2</sub>N-Asn-Val-O-tBu<sup>2</sup> according to the general procedure (method A) to yield 655 mg (93%) of the title compound as a white solid: mp 195-196 °C; <sup>1</sup>H NMR (400 MHz, CD<sub>3</sub>OD) δ 7.38-7.26 (comp, 5 H), 5.13 (d, *J* = 12.3 Hz, 1 H), 5.07 (d, *J* = 12.3 Hz, 1 H), 4.80 (app t, *J* = 6.5 Hz, 1 H), 4.18 (d, *J* = 5.5 Hz, 1 H), 3.98 (d, *J* = 6.5 Hz, 1 H), 2.80-2.67 (comp, 2 H), 2.18-2.05 (comp, 2 H), 1.47 (s, 9 H), 1.00-0.90 (comp, 12 H); <sup>13</sup>C NMR (75 MHz, CD<sub>3</sub>OD) δ 175.0, 174.0, 172.9, 171.9, 158.7, 138.1, 129.5, 129.0, 128.8, 82.9, 67.8, 62.2, 60.0, 51.4, 37.7, 31.9, 31.8, 28.3, 19.8, 19.5, 18.5, 18.4; mass spectrum (ESI) *m/z* [C<sub>35</sub>H<sub>50</sub>N<sub>5</sub>O<sub>9</sub> (M+H) requires].

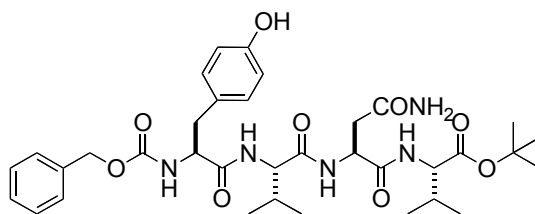

17

**(*N*-Cbz-tyrosyl)-valyl-aspargyl-valyl-O<sup>t</sup>Bu (17).** Prepared from Cbz-Tyr and **16** according to the general procedure (method A) to yield 337 mg (72%) of the title compound as a white solid. The white solid was purified by flash column chromatography eluting with CH<sub>2</sub>Cl<sub>2</sub>/MeOH (9:1): mp 215-217 °C; <sup>1</sup>H NMR (500 MHz, CD<sub>3</sub>OD) δ 7.33-7.22 (comp, 5 H), 7.06-7.02 (comp, 2 H), 6.70-6.66 (comp, 2 H), 5.04 (d, *J* = 12.8 Hz, 1 H), 4.99 (d, *J* = 12.8 Hz, 1 H), 4.76 (app t, *J* = 6.7 Hz, 1 H), 4.34 (dd, *J* = 9.5, 5.0 Hz, 1 H), 4.20-4.14 (comp, 2 H), 3.04 (dd, *J* = 13.9, 5.0 Hz, 1 H), 2.79-2.68 (comp, 2 H), 2.64 (dd, *J* = 15.7, 6.7 Hz, 1 H), 2.17-2.02 (comp, 2 H), 1.46 (s, 9 H), 0.96-0.88 (comp, 12 H); <sup>13</sup>C NMR (125 MHz, CD<sub>3</sub>OD) δ 174.9, 174.4, 173.1, 172.8, 171.9, 158.4, 157.2, 138.2, 131.3, 129.5, 129.2, 128.9, 128.7, 116.3, 83.0, 67.6, 60.1, 60.0, 58.1, 51.3, 38.1, 37.9, 32.1, 31.9, 28.3, 19.8, 19.5, 18.5, 18.4; mass spectrum (ESI) *m/z* 684.3607 [C<sub>35</sub>H<sub>50</sub>N<sub>5</sub>O<sub>9</sub> (M+H) requires 684.3609].

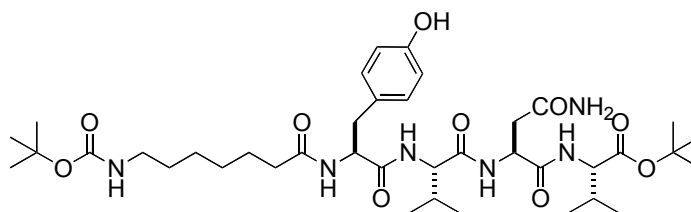

19

**(6-*N*-Boc-hexylcarbonyl)-tyrosyl-valyl-aspargyl-valyl-O<sup>t</sup>Bu (19).** Prepared from 7-(*tert*-butoxycarbonylamino)heptanoic acid and **18** according to the general procedure (method A) to yield 236 mg (92%) of the title compound as a white solid. The crude material was purified by preparative RP HPLC with a gradient of 0% B to 60% B over 30 min: mp 194-196 °C; <sup>1</sup>H NMR (500 MHz, DMSO-*d*<sub>6</sub>) δ 9.10 (br s, 1 H), 8.19 (d, *J* = 7.6 Hz, 1 H), 7.94 (d, *J* = 8.5 Hz, 1 H), 7.77 (d, *J* = 8.3 Hz, 1 H), 7.72 (d, *J* = 8.9 Hz, 1 H), 7.33 (s, 1 H), 7.03-6.99 (comp, 2 H), 6.92 (s, 1 H), 6.69 (app t, *J* = 5.1 Hz, 1 H), 6.62-6.58 (comp, 2 H), 4.62 (dd, *J* = 13.3, 7.5 Hz, 1 H), 4.46 (ddd, *J* = 10.5, 8.5, 4.0 Hz, 1 H), 4.21 (dd, *J* = 8.9, 6.2 Hz, 1 H), 4.01 (dd, *J* = 8.3, 5.5 Hz, 1 H), 2.92-2.82 (comp, 3 H), 2.62 (dd, *J* = 14.1, 10.5 Hz, 1 H), 2.54-2.48 (m, 1 H), 2.42 (dd, *J* = 15.8, 7.5 Hz, 1 H), 2.05-1.93 (comp, 4 H), 1.39 (s, 9 H), 1.35 (s, 9 H), 1.36-1.24 (comp, 4 H), 1.17-1.04 (comp, 4 H), 0.87-0.77 (comp, 12 H); <sup>13</sup>C NMR (125 MHz) δ 172.2, 171.5, 171.4, 170.9, 170.6, 170.2, 155.6, 155.5, 129.9, 128.2, 114.7, 80.6, 77.2, 57.8, 57.2, 54.0, 49.3, 40.1, 36.9, 36.1, 35.1, 30.8, 30.0, 29.3, 28.2, 28.2, 26.0, 25.2, 19.2, 18.8, 17.8, 17.7; mass spectrum (ESI) *m/z* 777.4759 [C<sub>26</sub>H<sub>38</sub>N<sub>6</sub>O<sub>7</sub> (M+H) requires 777.4762].

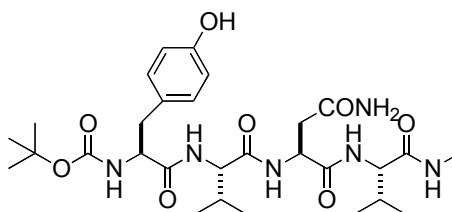

29

**(*N*-Boc-tyrosyl)-valyl-aspargyl-valyl-NHMe (29).** Prepared from Boc-Tyr and H<sub>2</sub>N-Val-Asn-Val-NHMe<sup>3</sup> according to the general procedure (method A) to yield 206 mg (95%) of the title compound as a white solid. The crude material was purified by preparative RP HPLC with a gradient of 0% B to 60% B over 30 min: mp 235-237 °C; <sup>1</sup>H NMR (500 MHz, DMSO-*d*<sub>6</sub>) δ 9.10 (br s, 1 H), 8.25 (d, *J* = 7.6 Hz, 1 H), 7.86-7.81 (m, 1 H), 7.69-7.62 (comp, 2 H), 4.60 (app dd, *J* = 13.9, 7.5 Hz, 1 H), 4.24 (dd, *J* = 8.9, 6.2 Hz, 1 H), 4.08 (ddd, *J* = 10.6, 8.9, 4.9 Hz, 1 H), 4.04 (dd, *J* = 8.8,

5.8 Hz, 1 H), 2.84 (dd,  $J = 14.0, 4.0$  Hz, 1 H), 2.63-2.53 (comp, 5 H), 2.40 (dd,  $J = 15.5, 6.2$  Hz, 1 H), 2.06-1.98 (m, 1 H), 1.98-1.89 (m, 1 H), 1.29 (s, 8 H), 1.23 (s, 1 H), 0.87-0.76 (comp, 12 H);  $^{13}\text{C}$  NMR (125 MHz)  $\delta$  171.8, 171.6, 170.9, 170.7, 170.6, 155.6, 155.2, 130.0, 128.3, 114.8, 78.0, 57.7, 56.9, 56.1, 49.5, 36.8, 36.3, 31.2, 29.9, 28.1, 27.8, 25.4, 19.1, 19.1, 17.8, 17.6; mass spectrum (ESI)  $m/z$  607.3450 [ $\text{C}_{29}\text{H}_{47}\text{N}_6\text{O}_8$  (M+H) requires 607.3455].

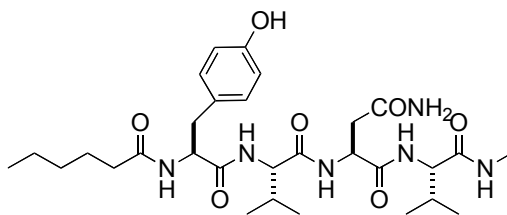

**31**

**Pentylcarboxyl-tyrosyl-valyl-asparagyl-valyl-NHMe (31).** Prepared from hexanoic acid and **30** according to the general procedure (method A) to yield 130 mg (91%) of the title compound as a white solid. The crude material was purified by preparative RP HPLC with a gradient of 0% B to 55% B over 30 min: mp 281-283 °C;  $^1\text{H}$  NMR (500 MHz,  $\text{DMSO}-d_6$ )  $\delta$  8.20 (d,  $J = 7.6$  Hz, 1 H), 7.94 (d,  $J = 8.5$  Hz, 1 H), 7.87-7.82 (m, 1 H), 7.71 (d,  $J = 8.8$  Hz, 1 H), 7.67 (d,  $J = 8.9$  Hz, 1 H), 7.42 (br s, 1 H), 7.03-6.99 (comp, 2 H), 6.96 (br s, 1 H), m 6.63-6.59 (comp, 2 H), 4.61 (app dd,  $J = 13.8, 7.5$  Hz, 1 H), 4.45 (ddd,  $J = 10.6, 8.5, 4.0$  Hz, 1 H), 4.20 (dd,  $J = 8.9, 6.4$  Hz, 1 H), 4.04 (dd,  $J = 8.8, 5.8$  Hz, 1 H), 2.87 (dd,  $J = 14.0, 4.0$  Hz, 1 H), 2.64-2.53 (comp, 5 H), 2.41 (dd,  $J = 15.4, 6.2$  Hz, 1 H), 2.07-1.96 (comp, 3 H), 1.96-1.88 (m, 1 H), 1.39-1.31 (comp, 2 H), 1.22-1.13 (comp, 2 H), 1.10-1.01 (comp, 2 H), 0.85-0.75 (comp, 15 H);  $^{13}\text{C}$  NMR (125 MHz)  $\delta$  172.2, 171.8, 171.5, 170.9, 170.7, 170.5, 155.6, 130.0, 128.1, 114.7, 57.7, 57.1, 54.0, 49.6, 36.8, 36.2, 35.1, 30.9, 30.6, 29.9, 25.4, 24.9, 21.8, 19.11, 19.10, 17.8, 17.6, 13.8; mass spectrum (ESI)  $m/z$  627.3477 [ $\text{C}_{30}\text{H}_{48}\text{N}_6\text{O}_7\text{Na}$  (M+Na) requires 627.3510].

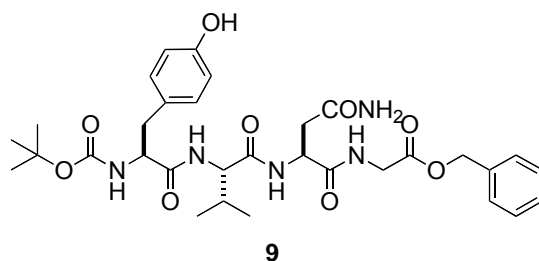

**(*N*-Boc-tyrosyl)-valyl-aspargyl-glycyl-OBn (9).** Prepared from Boc-Tyr and H<sub>2</sub>N-Val-Asn-Gly-OBn<sup>4</sup> according to the general procedure (method A) to yield 25 mg (89%) of the title compound as a white solid. The crude material was purified by preparative RP HPLC using a gradient of 0% B to 65% B over 30 min: mp 177-181 °C; <sup>1</sup>H NMR (500 MHz, CD<sub>3</sub>OD) δ 7.36-7.27 (comp, 5 H), 7.06-7.02 (comp, 2 H), 6.71-6.67 (comp, 2 H), 5.15 (s, 2 H), 4.75 (dd, *J* = 7.2, 6.0 Hz, 1 H), 4.27 (dd, *J* = 9.5, 5.1 Hz, 1 H), 4.13 (d, *J* = 6.8 Hz, 1 H), 4.01 (d, *J* = 17.7 Hz, 1 H), 3.60 (d, *J* = 17.7 Hz, 1 H), 3.01 (dd, *J* = 14.1, 5.1 Hz, 1 H), 2.77 (dd, *J* = 15.7, 6.0 Hz, 1 H), 2.73-2.68 (m, 1 H), 2.67 (dd, *J* = 15.7, 7.2 Hz, 1 H), 2.12-2.04 (m, 1 H), 1.35 (s, 9 H), 1.00-0.90 (comp, 6 H); <sup>13</sup>C NMR (125 MHz) δ 175.1, 174.8, 173.4, 173.2, 170.9, 157.8, 157.2, 137.2, 131.4, 129.6, 129.4, 129.3, 129.2, 116.2, 80.7, 67.9, 60.5, 57.5, 51.4, 42.2, 37.9, 37.6, 31.9, 28.7, 19.7, 18.6; mass spectrum (ESI) *m/z* 664.2953 [C<sub>32</sub>H<sub>43</sub>N<sub>5</sub>O<sub>9</sub>Na (M+Na) requires 664.2981].

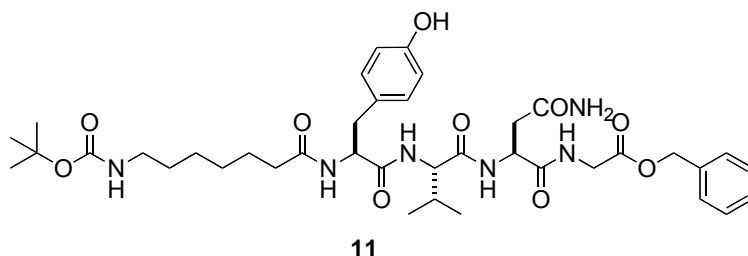

**(6-*N*-Boc-hexylcarbonyl)-tyrosyl-valyl-aspargyl-glycyl-OBn (11).** Prepared from 7-(*tert*-butoxycarbonylamino)heptanoic acid and **10** according to the general procedure (method A) to yield 186 mg (97%) of the title compound as a white solid. The crude material was purified by preparative RP HPLC with a gradient of 0% B to 60% B over 30 min: mp 198-200 °C; <sup>1</sup>H NMR (500 MHz, CD<sub>3</sub>OD) δ 7.35-7.27 (comp, 5 H), 7.08-7.04 (comp, 2 H), 6.71-6.67 (comp, 2 H), 5.14 (s, 2 H), 4.75 (dd, *J* = 7.2, 6.0 Hz, 1 H), 4.63 (dd, *J* = 10.1, 5.0 Hz, 1 H), 4.13 (d, *J* = 6.6 Hz, 1 H), 4.02 (d, *J* = 17.5 Hz, 1 H), 3.96 (d, *J* = 17.5 Hz, 1 H), 3.07 (dd, *J* = 14.2, 5.0 Hz, 1 H), 2.98 (t, *J* = 7.0 Hz, 2 H), 2.76 (dd, *J* = 15.7, 6.0 Hz, 1 H), 2.75 (dd, *J* = 14.2, 10.1 Hz, 1 H), 2.68 (dd, *J* = 15.7, 7.2 Hz, 1 H), 2.15-2.05 (comp, 3 H), 1.50-1.41 (comp, 11 H), 1.41-1.35 (comp, 2 H), 1.26-1.18 (comp, 2 H),

1.18-1.10 (comp, 2 H), 0.95 (d,  $J = 3.8$  Hz, 3 H), 0.93 (d,  $J = 3.8$  Hz, 3 H);  $^{13}\text{C}$  NMR (125 MHz)  $\delta$  176.3, 174.8, 174.6, 173.4, 173.2, 170.9, 158.6, 157.2, 137.2, 131.3, 129.6, 129.3, 129.3, 116.2, 79.8, 67.9, 60.5, 56.0, 51.4, 42.2, 41.3, 37.6, 36.8, 31.8, 30.8, 29.7, 28.8, 27.5, 26.9, 19.7, 18.6; mass spectrum (ESI)  $m/z$  769.4119 [ $\text{C}_{39}\text{H}_{57}\text{N}_6\text{O}_{10}$  ( $\text{M}+\text{H}$ ) requires 769.4136].

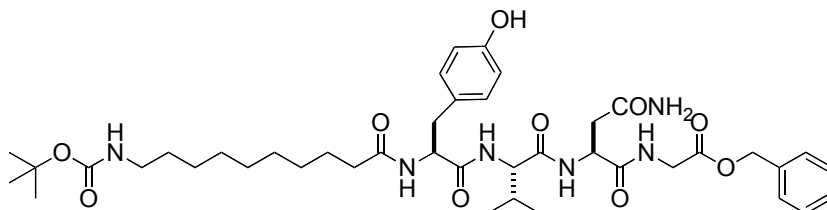

**22**

**(9-*N*-Boc-nonylcarbonyl)-tyrosyl-valyl-aspargyl-glycyl-OBn (22).** Prepared from 10-(*tert*-butoxycarbonylamino)decanoic acid and **21** according to the general procedure (method A) to yield 97 mg (97%) of the title compound as a white solid. The crude material was purified by preparative RP HPLC with a gradient of 0% B to 70% B over 30 min: mp 201-204 °C (dec);  $^1\text{H}$  NMR (500 MHz,  $\text{CD}_3\text{OD}$ )  $\delta$  7.36-7.26 (comp, 5 H), 7.05 (d,  $J = 8.5$  Hz, 2 H), 6.68 (d,  $J = 8.5$  Hz, 2 H), 5.15 (s, 2 H), 4.75 (dd,  $J = 7.1, 6.0$  Hz, 1 H), 4.62 (dd,  $J = 10.0, 5.0$  Hz, 1 H), 4.12 (d,  $J = 6.6$  Hz, 1 H), 4.02 (d,  $J = 17.7$  Hz, 1 H), 3.97 (d,  $J = 17.7$  Hz, 1 H), 3.06 (dd,  $J = 14.1, 5.0$  Hz, 1 H), 3.00 (app t,  $J = 7.1$  Hz, 2 H), 2.80-2.72 (comp, 2 H), 2.68 (dd,  $J = 15.7, 7.1$  Hz, 1 H), 2.17-2.04 (comp, 3 H), 1.50-1.39 (comp, 13 H), 1.32-1.10 (comp, 10 H), 0.97-0.90 (comp, 6 H);  $^{13}\text{C}$  NMR (125 MHz)  $\delta$  176.4, 174.8, 174.6, 173.3, 173.2, 170.9, 158.6, 157.2, 137.2, 131.2, 129.6, 129.3, 129.2, 116.2, 79.8, 67.9, 60.6, 56.0, 51.4, 42.2, 41.4, 37.6, 36.9, 31.8, 31.0, 30.5, 30.4, 30.1, 28.8, 27.8, 26.9, 19.7, 18.6; mass spectrum (ESI)  $m/z$  811.4600 [ $\text{C}_{42}\text{H}_{63}\text{N}_6\text{O}_{10}$  ( $\text{M}+\text{H}$ ) requires 811.4593] 777, 765.

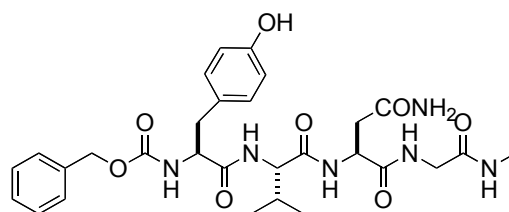

**26**

**(*N*-Cbz-tyrosyl)-valyl-aspargyl-glycyl-NHMe (26).** Prepared from Cbz-Tyr and  $\text{H}_2\text{N-Val-Asn-Val-NHMe}^4$  according to the general procedure (method A) to yield 137 mg (92%) of the title compound as a white solid. The crude material was purified by preparative RP HPLC with a



gradient of 0% B to 55% B over 30 min: mp 223-224 °C;  $^1\text{H}$  NMR (500 MHz,  $\text{DMSO-}d_6$ )  $\delta$  9.15 (br s, 1 H), 8.28 (d,  $J = 7.0$  Hz, 1 H), 8.17 (t,  $J = 5.9$  Hz, 1 H), 7.89 (d,  $J = 8.3$  Hz, 1 H), 7.68-7.61 (m, 1 H), 7.49-7.42 (comp, 2 H), 7.35-7.18 (comp, 5 H), 7.07-7.03 (comp, 2 H), 7.01 (br s, 1 H), 6.65-6.60 (comp, 2 H), 4.98-4.88 (comp, 2 H), 4.40 (dd,  $J = 13.4, 7.0$  Hz, 1 H), 4.25 (ddd,  $J = 14.6, 9.0, 3.6$  Hz, 1 H), 4.17 (dd,  $J = 8.3, 6.8$  Hz, 1 H), 3.64 (dd,  $J = 16.8, 6.0$  Hz, 1 H), 3.58 (dd,  $J = 16.8, 6.0$  Hz, 1 H), 2.88 (dd,  $J = 14.0, 3.6$  Hz, 1 H), 2.63-2.51 (comp, 6 H), 2.02-1.90 (m, 1 H), 0.87-0.76 (comp, 6 H);  $^{13}\text{C}$  NMR (125 MHz)  $\delta$  172.0, 171.8, 171.1, 170.9, 169.0, 155.8, 155.7, 137.0, 130.1, 128.2, 128.1, 127.6, 127.3, 114.8, 65.1, 57.6, 56.3, 49.9, 42.5, 36.7, 36.5, 30.6, 25.4, 19.0, 18.0; mass spectrum (ESI)  $m/z$  621.2643 [ $\text{C}_{29}\text{H}_{38}\text{N}_6\text{O}_8\text{Na}$  ( $\text{M}+\text{Na}$ ) requires 621.2640].

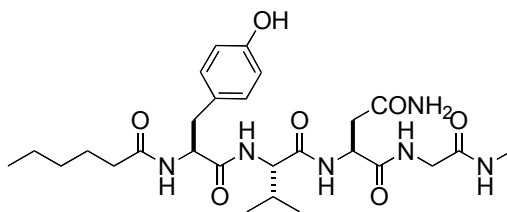

**28**

**Pentylcarbonyl-tyrosyl-valyl-aspargyl-glycyl-NHMe (28).** Prepared from hexanoic acid and **27** according to the general procedure (method C) to yield 38 mg (62%) of the title compound as a white solid. The crude material was purified by preparative RP HPLC with a gradient of 0% B to 60% B over 30 min: mp 227-230 °C;  $^1\text{H}$  NMR (500 MHz,  $\text{CD}_3\text{OD}$ )  $\delta$  7.08-7.03 (comp, 2 H), 6.70-6.66 (comp, 2 H), 4.62 (dd,  $J = 10.0, 5.0$  Hz, 1 H), 4.59 (t,  $J = 6.5$  Hz, 1 H), 4.09 (d,  $J = 6.9$  Hz, 1 H), 3.85 (d,  $J = 16.9$  Hz, 1 H), 3.79 (d,  $J = 16.9$  Hz, 1 H), 3.03 (dd,  $J = 14.0, 5.0$  Hz, 1 H), 2.82 (dd,  $J = 15.8, 6.5$  Hz, 1 H), 2.76 (dd,  $J = 15.8, 6.5$  Hz, 1 H), 2.74 (dd,  $J = 14.0, 10.0$  Hz, 1 H), 2.71 (s, 3 H), 2.13 (t,  $J = 7.5$  Hz, 2 H), 2.11-2.04 (m, 1 H), 1.46 (p,  $J = 15.3, 7.5$  Hz, 2 H), 1.30-1.21 (comp, 2 H), 1.18-1.09 (comp, 2 H), 0.97-0.92 (comp, 6 H), 0.85 (t,  $J = 7.2$  Hz, 3 H);  $^{13}\text{C}$  NMR (125 MHz)  $\delta$  176.4, 175.0, 174.7, 173.7, 173.4, 172.2, 157.2, 131.2, 129.2, 116.2, 60.6, 56.0, 52.0, 43.8, 37.7, 37.3, 36.8, 32.3, 31.8, 26.6, 26.3, 23.4, 19.6, 18.7, 14.2; mass spectrum (ESI)  $m/z$  563.3190 [ $\text{C}_{26}\text{H}_{38}\text{N}_6\text{O}_7$  ( $\text{M}+\text{H}$ ) requires 563.3193].

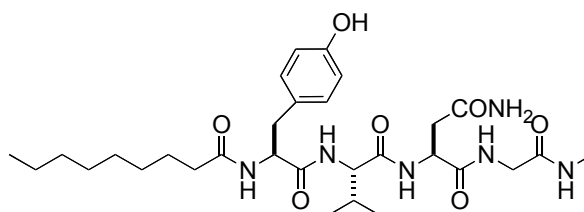

32

**Octylcarbonyl-tyrosyl-valyl-asparagyl-glycyl-NHMe (32).** Prepared from nonanoic acid and **31** according to the general procedure (method A) to yield 62 mg (85%) of the title compound as a white solid. The crude material was purified using RP HPLC with a gradient of 0% B to 70% B over 30 min: mp 232-233 °C;  $^1\text{H}$  NMR (500 MHz,  $\text{CD}_3\text{OD}$ )  $\delta$  7.08-7.03 (comp, 2 H), 6.71-6.66 (comp, 2 H), 4.62 (dd,  $J = 10.0, 5.1$  Hz, 1 H), 4.59 (app t,  $J = 6.5$  Hz, 1 H), 4.09 (d,  $J = 6.9$  Hz, 1 H), 3.85 (d,  $J = 16.7$  Hz, 1 H), 3.80 (d,  $J = 16.7$  Hz, 1 H), 3.03 (dd,  $J = 14.1, 5.1$  Hz, 1 H), 2.81 (dd,  $J = 15.8, 6.5$  Hz, 1 H), 2.75 (dd,  $J = 15.8, 6.5$  Hz, 1 H), 2.74 (dd,  $J = 14.1, 10.0$  Hz, 1 H), 2.71 (s, 3 H), 2.13 (app t,  $J = 7.3$  Hz, 2 H), 2.10-2.04 (m, 1 H), 1.50-1.42 (comp, 2 H), 1.34-1.11 (comp, 10 H), 0.98-0.92 (comp, 6 H), 0.88 (t,  $J = 7.1$  Hz, 3 H);  $^{13}\text{C}$  NMR (125 MHz)  $\delta$  176.4, 175.0, 174.7, 173.7, 173.4, 172.2, 157.2, 131.2, 129.2, 116.2, 60.6, 56.0, 52.0, 43.8, 37.7, 37.3, 36.8, 33.0, 31.8, 30.4, 30.2, 30.1, 27.0, 26.3, 23.7, 19.6, 18.7, 14.4; mass spectrum (ESI)  $m/z$  605.3665 [ $\text{C}_{30}\text{H}_{49}\text{N}_6\text{O}_7$  ( $\text{M}+\text{H}$ ) requires 605.3663].

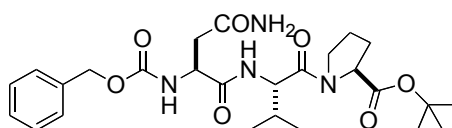

33

**(*N*-Cbz-asparagyl)-valyl-prolyl-*O*<sup>t</sup>Bu (33).** Prepared from Cbz-Asn and  $\text{H}_2\text{N-Val-Pro-}O^t\text{Bu}$  according to the general procedure (method B) to yield 785 mg (98%) of the title compound as a white solid. The crude product was purified by flash chromatography, eluting with  $\text{CH}_2\text{Cl}_2/\text{CH}_3\text{OH}$  (95:5): mp 48-51 °C;  $^1\text{H}$  NMR (500 MHz,  $\text{CDCl}_3$ )  $\delta$  7.45 (d,  $J = 8.7$  Hz, 1 H), 7.37-7.28 (comp, 5 H), 6.42 (d,  $J = 8.5$  Hz, 1 H), 6.10 (br s, 1 H), 5.76 (br s, 1 H), 5.14-5.09 (comp, 2 H), 4.58-4.50 (comp, 2 H), 4.36 (dd,  $J = 8.2, 4.9$  Hz, 1 H), 3.79-3.72 (m, 1 H), 3.66-3.59 (m, 1 H), 2.90 (dd,  $J = 15.6, 3.9$  Hz, 1 H), 2.59 (dd,  $J = 15.6, 5.7$  Hz, 1 H), 2.22-2.12 (m, 1 H), 2.12-2.05 (m, 1 H), 2.05-1.98 (m, 1 H), 1.98-1.87 (comp, 2 H), 1.44 (s, 9 H), 1.01 (d,  $J = 6.8$  Hz, 3 H), 0.93 (d,  $J = 6.8$  Hz, 3 H);  $^{13}\text{C}$  NMR (125 MHz)  $\delta$  173.3, 171.2, 170.7, 170.1, 156.2, 136.2, 128.5, 128.2, 81.4, 67.2,

59.8, 55.9, 51.7, 47.3, 36.9, 31.2, 29.1, 28.0, 24.9, 19.4, 17.7; mass spectrum (ESI)  $m/z$  519.2814 [ $C_{26}H_{39}N_4O_7$  (M+H) requires 519.2813].

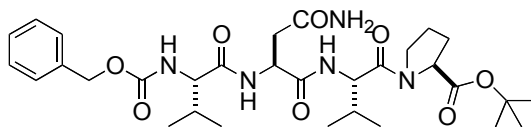

35

**(N-Cbz-valyl)-asparagyl-valyl-prolyl-O<sup>t</sup>Bu (35).** Prepared from Cbz-Val and **34** according to the general procedure (method B) to yield 571 mg (89%) of the title compound as a white solid. The crude product was purified by flash chromatography, eluting with  $CH_2Cl_2/CH_3OH$  (95:5): mp 183-184 °C;  $^1H$  NMR (400 MHz,  $CDCl_3$ )  $\delta$  7.87 (d,  $J = 7.8$  Hz, 1 H), 7.70 (d,  $J = 8.6$  Hz, 1 H), 7.38-7.24 (comp, 5 H), 6.40 (br s, 1 H), 6.02 (br s, 1 H), 5.91 (d,  $J = 8.6$  Hz, 1 H), 5.12 (d,  $J = 12.1$  Hz, 1 H), 4.99 (d,  $J = 12.1$  Hz, 1 H), 4.92-4.84 (m, 1 H), 4.53 (app t,  $J = 7.6$  Hz, 1 H), 4.35 (dd,  $J = 8.4, 4.9$  Hz, 1 H), 4.14 (dd,  $J = 8.2, 8.1$  Hz, 1 H), 3.80-3.72 (m, 1 H), 3.66-3.58 (m, 1 H), 2.78 (dd,  $J = 15.3, 5.3$  Hz, 1 H), 2.57 (dd,  $J = 15.3, 6.1$  Hz, 1 H), 2.20-1.84 (comp, 6 H), 1.42 (s, 9 H), 1.04-0.86 (comp, 12 H);  $^{13}C$  NMR (100 MHz)  $\delta$  173.3, 171.6, 171.3, 170.6, 170.0, 156.7, 136.4, 128.5, 128.0, 81.3, 66.9, 60.3, 59.8, 56.0, 49.9, 47.2, 37.1, 31.3, 30.9, 29.1, 28.0, 24.9, 19.4, 19.3 17.7; mass spectrum (ESI)  $m/z$  618.3498 [ $C_{31}H_{48}N_5O_8$  (M+H) requires 618.3497].

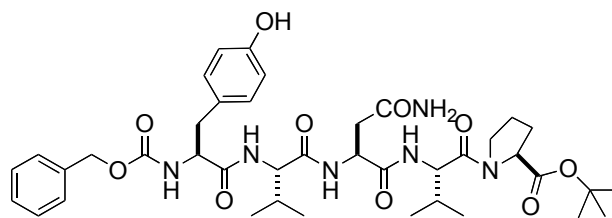

37

**(N-Cbz-tyrosyl)-valyl-asparagyl-valyl-prolyl-O<sup>t</sup>Bu (37).** Prepared from Cbz-Tyr and **36** according to the general procedure (method A) to yield 423 mg (97%) of the title compound as a white solid. The crude product was found to be >95% pure by  $^1H$  NMR and used without further purification: mp 193-194 °C;  $^1H$  NMR (400 MHz,  $CD_3OD$ )  $\delta$  7.32-7.19 (comp, 5 H), 7.04 (d,  $J = 8.6$  Hz, 2 H), 6.68 (d,  $J = 8.6$  Hz, 2 H), 5.05 (d,  $J = 12.7$  Hz, 1 H), 4.98 (d,  $J = 12.7$  Hz, 1 H), 4.75 (app t,  $J = 6.7$  Hz, 1 H), 4.45 (d,  $J = 7.6$  Hz, 1 H), 4.41 (dd,  $J = 9.8, 4.7$  Hz, 1 H), 4.30 (dd,  $J = 8.4, 4.9$  Hz, 1 H), 4.22 (d,  $J = 6.8$  Hz, 1 H), 3.84-3.76 (m, 1 H), 3.67-3.59 (m, 1 H), 3.05 (dd,  $J = 14.1, 4.7$  Hz, 1

H), 2.74 (dd,  $J = 14.1, 9.8$  Hz, 1 H), 2.71 (dd,  $J = 15.4, 6.7$  Hz, 1 H), 2.63 (dd,  $J = 15.4, 6.7$  Hz, 1 H), 2.24-1.84 (comp, 6 H), 1.48-1.41 (s, 9 H), 1.03 (d,  $J = 6.8$  Hz, 3 H), 0.97 (d,  $J = 6.8$  Hz, 3 H), 0.93 (d,  $J = 7.6$  Hz, 3 H), 0.91 (d,  $J = 7.6$  Hz, 3 H);  $^{13}\text{C}$  NMR (100 MHz)  $\delta$  174.7, 174.4, 173.1, 172.8, 172.7, 171.9, 158.3, 157.2, 138.2, 131.4, 129.4, 129.3, 128.9, 128.6, 116.2, 82.6, 67.5, 61.4, 60.0, 58.0, 57.7, 51.5, 38.2, 37.9, 32.1, 31.8, 30.2, 28.2, 25.8, 19.8, 18.7, 18.6; mass spectrum (ESI)  $m/z$  781.4129 [ $\text{C}_{40}\text{H}_{57}\text{N}_6\text{O}_{10}$  (M+H) requires 781.4131].

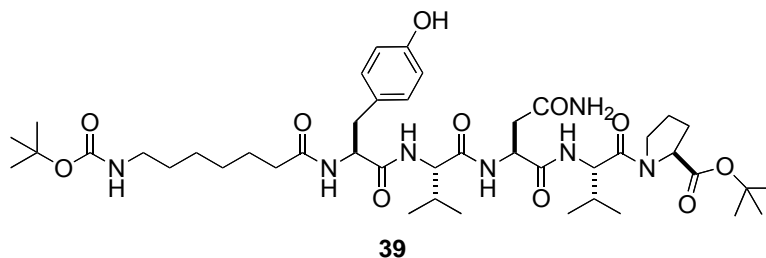

**(6-*N*-Boc-hexylcarbonyl)-tyrosyl-valyl-asparagyl-valyl-prolyl-*O*<sup>t</sup>Bu (39).** Prepared from 7-(*tert*-butoxycarbonylamino)heptanoic acid and **38** according to the general procedure (method A) to yield 106 mg (97%) of the title compound as a white solid. The crude product was purified using RP HPLC with a gradient of 0% B to 60% B over 30 min: mp 180-182 °C;  $^1\text{H}$  NMR (500 MHz,  $\text{CD}_3\text{OD}$ )  $\delta$  7.07-7.03 (comp, 2 H), 6.70-6.66 (comp, 2 H), 4.70 (app t,  $J = 6.7$  Hz, 1 H), 4.63 (dd,  $J = 10.2, 4.9$  Hz, 1 H), 4.44 (d,  $J = 7.8$  Hz, 1 H), 4.30 (dd,  $J = 8.5, 5.1$  Hz, 1 H), 4.18 (d,  $J = 6.8$  Hz, 1 H), 3.84-3.77 (m, 1 H), 3.67-3.60 (m, 1 H), 3.06 (dd,  $J = 14.1, 4.9$  Hz, 1 H), 2.98 (t,  $J = 7.0$  Hz, 2 H), 2.75 (dd,  $J = 14.1, 10.2$  Hz, 1 H), 2.71 (dd,  $J = 15.6, 6.7$  Hz, 1 H), 2.65 (dd,  $J = 15.6, 6.7$  Hz, 1 H), 2.24-2.16 (m, 1 H), 2.15-2.04 (comp, 4 H), 2.04-1.86 (comp, 3 H), 1.50-1.34 (comp, 22 H), 1.26-1.19 (comp, 2 H), 1.18-1.10 (comp, 2 H), 1.03 (d,  $J = 6.8$  Hz, 3 H), 0.97 (d,  $J = 6.8$  Hz, 3 H), 0.94 (d,  $J = 6.8$  Hz, 3 H), 0.92 (d,  $J = 6.8$  Hz, 3 H);  $^{13}\text{C}$  NMR (125 MHz)  $\delta$  176.2, 174.8, 174.2, 173.1, 172.8, 172.7, 171.9, 158.6, 157.2, 131.3, 129.3, 116.2, 82.6, 79.8, 61.4, 60.1, 57.8, 56.0, 51.5, 41.3, 37.8, 37.7, 36.8, 32.0, 31.8, 30.8, 30.2, 29.7, 28.8, 28.2, 27.6, 26.9, 25.8, 19.8, 18.7, 18.5; mass spectrum (ESI)  $m/z$  874.5286 [ $\text{C}_{44}\text{H}_{72}\text{N}_7\text{O}_{11}$  (M+H) requires 874.5284].

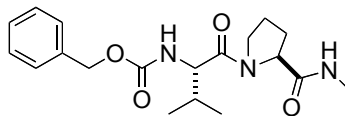

42

**(*N*-Cbz-valyl)-prolyl-NHMe (42).** Prepared from Cbz-Val and Pro-NHMe according to the general procedure (method B) to yield 1.95 g (70%) of the title compound as a white solid. The crude product was purified by flash chromatography, eluting with EtOAc/hexane (4:1): mp 41-43 °C; <sup>1</sup>H NMR (400 MHz, CD<sub>3</sub>OD) (rotamers 15:85) δ 7.37-7.26 (comp, 5 H), 6.89 (br s, 1 H), 5.68 (d, *J* = 8.9 Hz, 1 H), 5.10 (d, *J* = 12.3 Hz, 1 H), 5.04 (d, *J* = 12.3 Hz, 1 H), 4.51 (dd, *J* = 8.2, 3.1 Hz, 0.85 H), 4.44-4.38 (m, 0.15 H), 4.35-4.28 (m, 0.85 H), 4.00-3.95 (m, 0.15 H), 3.76-3.67 (m, 0.85 H), 3.62-3.54 (m, 0.85 H), 3.44 (br s, 0.15 H), 3.35 (br s, 0.15 H), 2.78-2.65 (comp, 3 H), 2.50-2.43 (m, 0.15 H), 2.36-2.27 (m, 0.85 H), 2.18-1.78 (comp, 4 H), 0.96 (d, *J* = 6.5 Hz, 3 H), 0.90 (d, *J* = 6.5 Hz, 3 H); <sup>13</sup>C NMR (100 MHz, CD<sub>3</sub>OD) δ 172.3, 171.7, 171.6, 156.7, 156.6, 136.5, 128.7, 128.4, 128.3, 67.2, 59.9, 59.8, 57.8, 57.7, 47.9, 31.7, 27.3, 26.3, 26.1, 25.3, 19.7, 19.5, 18.1, 17.8; mass spectrum (ESI) *m/z* 362.2077 [C<sub>19</sub>H<sub>28</sub>N<sub>3</sub>O<sub>4</sub> (M+H) requires 362.2080].

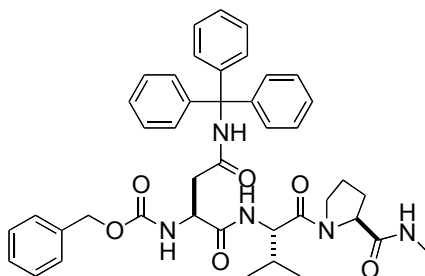

44

**[*N*-Cbz-*N*-(trityl)-glutamyl]-valyl-prolyl-NHMe (44).** Prepared from Cbz-Asn(Trt) and **43** according to the general procedure (method A) to yield 250 mg (87%) of the title compound as a white solid. The crude product was purified by flash chromatography, eluting with CH<sub>2</sub>Cl<sub>2</sub>/MeOH (95:5): mp 126-128 °C; <sup>1</sup>H NMR (400 MHz, CD<sub>3</sub>OD) (rotamers 5:1) δ 7.40-7.11 (comp, 20 H), 5.14 (d, *J* = 12.3 Hz, 1 H), 5.00 (d, *J* = 12.3 Hz, 1 H), 4.59 (dd, *J* = 8.6, 4.3 Hz, 1 H), 4.53 (d, *J* = 6.8 Hz, 1 H), 4.15 (app t, *J* = 6.5 Hz, 1 H), 3.63-3.51 (comp, 2 H), 2.78 (dd, *J* = 15.1, 8.6 Hz, 1 H), 2.66 (dd, *J* = 15.1, 4.3 Hz, 1 H), 2.57 (s, 2.5 H), 2.49 (s, 0.5 H), 2.14-1.60 (comp, 5 H), 1.02-0.80 (comp, 6 H); <sup>13</sup>C NMR (100 MHz) δ 173.7, 172.2, 170.9, 170.2, 156.9, 144.7, 136.8, 128.8, 128.4, 128.0, 127.6,

126.7, 70.6, 66.8, 60.6, 56.4, 52.2, 38.6, 30.9, 29.4, 25.2, 24.8, 18.7, 17.3; mass spectrum (ESI)  $m/z$  718.3607 [ $C_{42}H_{48}N_5O_6$  (M+H) requires 718.3605].

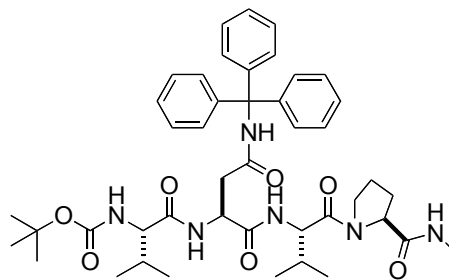

46

**(*N*-Boc-valyl)-[*N*-(trityl)-glutamyl]-valyl-prolyl-NHMe (46).** Prepared from Boc-Val and **45** according to the general procedure (method A) to yield 112 mg (87%) of the title compound as a white solid. The crude product was purified by flash chromatography, eluting with  $CH_2Cl_2/MeOH$  (95:5): mp 149-150 °C;  $^1H$  NMR (400 MHz,  $CD_3OD$ ) (rotamers 20:80)  $\delta$  7.28-7.16 (comp, 15 H), 4.78 (app t,  $J = 7.0$  Hz, 1 H), 4.51-4.44 (m, 1 H), 4.29 (dd,  $J = 7.8, 5.7$  Hz, 0.8 H), 4.23 (d,  $J = 7.6$  Hz, 0.2 H), 4.02-3.93 (comp, 1.2 H), 3.78-3.72 (m, 0.8 H), 3.66-3.58 (m, 0.8 H), 3.49-3.44 (m, 0.2 H), 2.78-2.62 (comp, 5 H), 2.15-1.72 (comp, 6 H), 1.41 (s, 9 H), 1.01-0.85 (comp, 12 H);  $^{13}C$  NMR (100 MHz)  $\delta$  173.7, 173.0, 171.6, 171.0, 170.2, 156.7, 144.7, 128.8, 127.6, 126.6, 79.4, 70.6, 60.6, 59.9, 56.8, 50.3, 38.3, 31.4, 30.6, 29.4, 27.6, 25.2, 24.8, 18.7, 17.4, 17.0; mass spectrum (ESI)  $m/z$  783.4451 [ $C_{44}H_{59}N_6O_7$  (M+H) requires 783.4445].

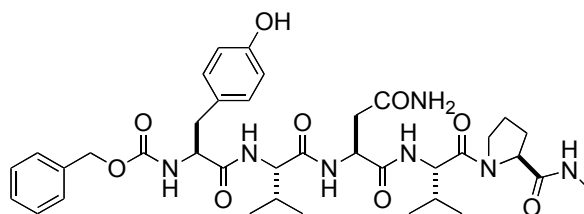

48

**(*N*-Cbz-tyrosyl)-valyl-glutamyl-valyl-prolyl-NHMe (48).** Prepared from Cbz-Tyr and **47** according to the general procedure (method A) to yield 600 mg (88%) of the title compound as a white solid. The crude product was purified by flash chromatography, eluting with  $CH_2Cl_2/MeOH$  (9:1): mp 204-205 °C;  $^1H$  NMR (500 MHz,  $DMSO-d_6$ , 363 K)  $\delta$  8.82 (s, 1 H), 8.00 (d,  $J = 7.4$  Hz, 1 H), 7.56 (d,  $J = 8.2$  Hz, 1 H), 7.41-7.20 (comp, 7 H), 7.23 (d,  $J = 8.5$  Hz, 2 H), 6.65 (d,  $J = 8.5$  Hz, 2 H), 4.99 (s, 2 H), 4.62 (app dd,  $J = 14.0, 6.6$  Hz, 1 H), 4.42-4.33 (m, 1 H), 4.31-4.18 (comp, 3 H),

3.70-3.50 (comp, 2 H), 2.96 (dd,  $J = 14.2, 4.2$  Hz, 1 H), 2.70 (dd,  $J = 14.2, 10.0$  Hz, 1 H), 2.61-2.53 (comp, 4 H), 2.51-2.41 (comp, 2 H), 2.07-1.87 (comp, 4 H), 1.86-1.73 (comp, 2 H), 0.95-0.81 (comp, 12 H);  $^{13}\text{C}$  NMR (125 MHz)  $\delta$  171.4, 171.1, 171.0, 170.3, 170.0, 169.2, 155.4, 155.3, 136.6, 129.5, 127.8, 127.7, 127.1, 126.8, 114.6, 65.0, 59.2, 57.3, 56.1, 55.3, 49.4, 46.6, 36.7, 36.3, 30.2, 29.9, 28.5, 25.0, 24.0, 18.7, 17.4; mass spectrum (ESI)  $m/z$  738.3824 [ $\text{C}_{37}\text{H}_{52}\text{N}_9\text{O}_7$  (M+H) requires 738.3821].

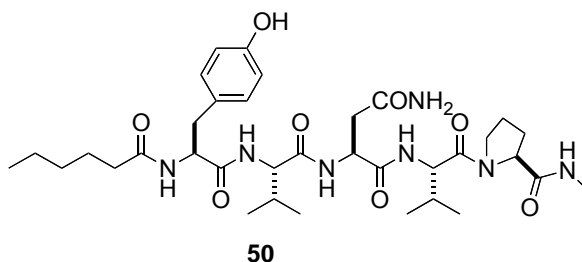

**Pentylcarbonyl-*O*-phosphotyrosyl-valyl-asparagyl-valyl-prolyl-NHMe (50).** Prepared from hexanoic acid and **49** according to the general procedure (method A) to yield 95 mg (89%) of the title compound as a white solid. The crude product was found to be >95% pure by  $^1\text{H}$  NMR and used without further purification: mp 240-241 °C;  $^1\text{H}$  NMR (500 MHz,  $\text{DMSO-}d_6$ , 403 K)  $\delta$  8.56 (br s, 1 H), 7.80 (d,  $J = 7.4$  Hz, 1 H), 7.42 (br s, 1 H), 7.30 (d,  $J = 7.9$  Hz, 1 H), 7.26-7.14 (comp, 2 H), 7.00 (dd,  $J = 6.4, 1.8$  Hz, 2 H), 6.64 (comp, 3 H), 4.61 (app dd,  $J = 14.0, 6.4$  Hz, 1 H), 4.53-4.45 (m, 1 H), 4.42-4.31 (comp, 2 H), 4.19 (dd,  $J = 8.6, 6.1$  Hz, 1 H), 3.70-3.50 (comp, 2 H), 2.98 (dd,  $J = 14.4, 4.8$  Hz, 1 H), 2.74 (dd,  $J = 14.4, 9.3$  Hz, 1 H), 2.62-2.55 (comp, 4 H), 2.52-2.44 (m, 1 H), 2.10-1.78 (comp, 8 H), 1.5-1.42 (comp, 2 H), 1.30-1.15 (comp, 4 H), 0.94-0.82 (comp, 15 H);  $^{13}\text{C}$  NMR (125 MHz)  $\delta$  171.7, 171.0, 170.9, 170.8, 170.0, 169.7, 169.1, 155.1, 129.1, 127.7, 114.4, 59.1, 57.3, 55.1, 53.7, 49.4, 46.2, 36.5, 35.6, 34.7, 30.1, 29.8, 24.7, 24.0, 20.9, 18.4, 17.03, 17.01, 12.7; mass spectrum (ESI)  $m/z$  724.4004 [ $\text{C}_{35}\text{H}_{55}\text{N}_7\text{O}_8\text{Na}$  (M+Na) requires 724.4004].

**Representative procedure for hydrogenolysis of *N*-Cbz protected peptides. Preparation of 16, 18, 27, 34, 36, 38, 43, 45, 49.**

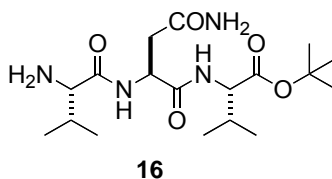

**Valyl-aspargyl-valyl-O<sup>t</sup>Bu (16).** The benzyl carbamate **15** (526 mg, 1.01 mmol) was dissolved in MeOH (10 mL) containing 10% Pd/C (108 mg, 10 mol %). The resulting mixture was purged four times with H<sub>2</sub>, and the suspension was stirred under H<sub>2</sub> (1 atm) for 7 h. The mixture was filtered through a pad of celite, and the pad was washed with MeOH (5 mL). The combined filtrate and washings were concentrated to dryness under reduced pressure to yield 390 mg (99%) of **16** as a white solid. This material was found to be >90% pure by <sup>1</sup>H NMR and used without further purification: mp 64-66 °C; <sup>1</sup>H NMR (400 MHz, CD<sub>3</sub>OD) δ 4.82 (dd, *J* = 7.5, 5.8 Hz, 1 H), 4.19 (d, *J* = 5.5 Hz, 1 H), 3.20 (d, *J* = 5.1 Hz, 1 H), 2.73 (dd, *J* = 15.7, 5.8 Hz, 1 H), 2.67 (dd, *J* = 15.7, 7.5 Hz, 1 H), 2.19-2.09 (m, 1 H), 2.06-1.96 (m, 1 H), 1.47 (s, 9 H), 1.00-0.90 (comp, 12 H); <sup>13</sup>C NMR (75 MHz, CD<sub>3</sub>OD) δ 176.5, 174.8, 173.1, 172.0, 83.0, 61.3, 59.8, 51.1, 38.1, 33.1, 31.9, 28.3, 19.8, 19.5, 18.3, 17.6; mass spectrum (ESI) *m/z* [C<sub>35</sub>H<sub>50</sub>N<sub>5</sub>O<sub>9</sub> (M+H) requires].

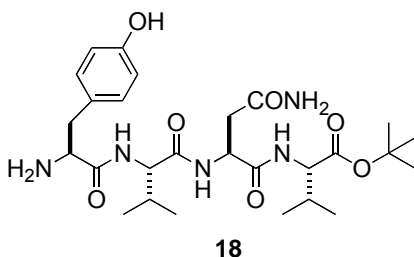

**Tyrosyl-valyl-aspargyl-valyl-O<sup>t</sup>Bu (18).** Prepared in 89% yield by hydrogenolysis of **17** (43 mg, 0.062 mmol) in MeOH (15 mL) as a white solid. This material was shown to be >95% pure by <sup>1</sup>H NMR and was used without further purification: mp 93-96 °C; <sup>1</sup>H NMR (400 MHz, CD<sub>3</sub>OD) δ 7.06-7.01 (comp, 2 H), 6.74-6.69 (comp, 2 H), 4.77 (t, *J* = 6.5 Hz, 1 H), 4.18 (d, *J* = 6.8 Hz, 1 H), 4.15 (d, *J* = 5.5 Hz, 1 H), 3.64 (dd, *J* = 8.2, 5.1 Hz, 1 H), 2.98 (dd, *J* = 13.3, 5.1 Hz, 1 H), 2.79-2.61 (comp, 3 H), 2.18-2.02 (comp, 2 H), 1.46 (s, 9 H), 0.97-0.89 (comp, 12 H); <sup>13</sup>C NMR (100 MHz, CD<sub>3</sub>OD) δ 176.4, 174.8, 173.2, 172.8, 171.9, 157.4, 131.5, 129.0, 116.4, 82.9, 59.9, 57.4, 51.3, 41.0, 37.9, 32.0, 31.9, 28.3, 19.8, 19.5, 18.6, 18.4; mass spectrum (ESI) *m/z* 550.3236 [C<sub>27</sub>H<sub>44</sub>N<sub>5</sub>O<sub>7</sub> (M+H) requires 550.3235].



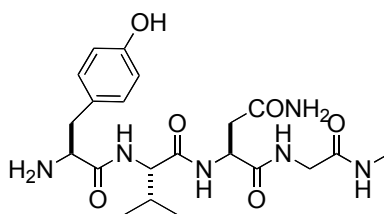

27

**Tyrosyl-valyl-aspargyl-glycyl-NHM3 (27).** Prepared in 99% yield by hydrogenolysis of **26** (80 mg, 0.134 mmol) in MeOH (25 mL) as a white solid. This material was shown to be >95% pure by  $^1\text{H}$  NMR and was used without further purification: mp 98-100 °C;  $^1\text{H}$  NMR (400 MHz,  $\text{CD}_3\text{OD}$ )  $\delta$  7.06 (d,  $J = 8.5$  Hz, 2 H), 6.74 (d,  $J = 8.5$  Hz, 2 H), 4.64 (app t,  $J = 6.5$  Hz, 1 H), 4.13 (d,  $J = 6.8$  Hz, 1 H), 3.87 (d,  $J = 17.1$  Hz, 1 H), 3.81 (d,  $J = 17.1$  Hz, 1 H), 3.76 (dd,  $J = 8.5, 5.1$  Hz, 1 H), 3.03 (dd,  $J = 14.0, 5.1$  Hz, 1 H), 2.86-2.70 (comp, 6 H), 2.11-2.03 (m, 1 H), 0.94 (app d,  $J = 6.8$  Hz, 6 H);  $^{13}\text{C}$  NMR (75 MHz,  $\text{CD}_3\text{OD}$ )  $\delta$  175.7, 174.9, 173.6, 173.4, 172.1, 157.6, 131.5, 128.4, 116.5, 60.5, 57.0, 52.0, 43.7, 40.4, 37.3, 31.8, 26.3, 19.6, 18.8; mass spectrum (ESI)  $m/z$  465.2456 [ $\text{C}_{21}\text{H}_{33}\text{N}_6\text{O}_6$  (M+H) requires 465.2456].

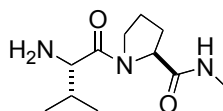

43

**Valyl-prolyl-NHMe (43).** Prepared in 85% yield by hydrogenolysis of **42** (75 mg, 0.208 mmol) in MeOH (2 mL) as a clear glass. This material was found to be >95% pure by  $^1\text{H}$  NMR and used without further purification.  $^1\text{H}$  NMR (400 MHz,  $\text{CD}_3\text{OD}$ ) (rotamers 20:80)  $\delta$  4.45 (dd,  $J = 8.5, 3.1$  Hz, 0.2 H), 4.36 (dd,  $J = 8.2, 5.1$  Hz, 0.8 H), 3.76-3.59 (comp, 1.8 H), 3.57-3.46 (m, 0.2 H), 3.40 (d,  $J = 5.8$  Hz, 0.8 H), 2.95 (d,  $J = 7.2$  Hz, 0.2 H), 2.77 (s, 0.5 H), 2.72 (s, 2.5 H), 2.32-1.80 (comp, 5 H), 1.02-0.90 (comp, 6 H);  $^{13}\text{C}$  NMR (100 MHz)  $\delta$  175.3, 174.2, 173.9, 173.6, 60.6, 60.5, 58.5, 57.8, 33.3, 33.1, 33.08, 30.6, 26.6, 26.3, 26.0, 23.4, 20.04, 19.95, 18.2, 17.5; mass spectrum (ESI)  $m/z$  228.1717 [ $\text{C}_{11}\text{H}_{22}\text{N}_3\text{O}_2$  (M+H) requires 228.1712].

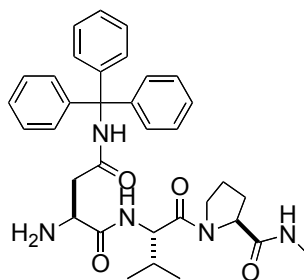

45

**N-(Trityl)-asparagyl-valyl-prolyl-NHMe (45).** Prepared in 99% yield by hydrogenolysis of **44** (1.50 g, 2.09 mmol) in MeOH (30 mL) as a white solid. This material was found to be >90% pure by  $^1\text{H}$  NMR and used without further purification: mp 114-116 °C;  $^1\text{H}$  NMR (400 MHz,  $\text{CD}_3\text{OD}$ ) (rotamers 20:80)  $\delta$  7.30-7.16 (comp, 15 H), 4.52 (dd,  $J = 8.5, 3.1$  Hz, 0.2 H), 4.46 (d,  $J = 7.4$  Hz, 0.8 H), 4.33-4.25 (comp, 1 H), 3.88-3.80 (m, 0.8 H), 3.71-3.62 (comp, 1.8 H), 3.61-3.55 (m, 0.2 H), 3.52-3.45 (m, 0.2 H), 2.74-2.65 (comp, 4 H), 2.55 (dd,  $J = 15.5, 8.8$  Hz, 1 H), 2.22-1.94 (comp, 3 H), 1.92-1.80 (comp, 2 H), 1.07-0.88 (comp, 6 H),  $^{13}\text{C}$  NMR (100 MHz)  $\delta$  175.2, 174.6, 173.6, 172.9, 171.6, 171.4, 171.2, 144.9, 128.9, 127.6, 126.7, 70.5, 60.9, 60.6, 56.6, 56.3, 52.2, 52.1, 41.2, 41.2, 35.8, 32.0, 31.7, 30.7, 29.5, 25.7, 25.2, 24.9, 22.1, 18.7, 18.4, 17.5, 17.4; mass spectrum (ESI)  $m/z$  584.3254 [ $\text{C}_{34}\text{H}_{42}\text{N}_5\text{O}_4$  (M+H) requires 584.3231].

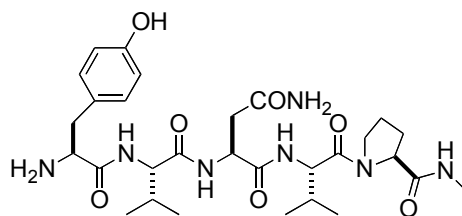

49

**Tyrosyl-valyl-asparagyl-valyl-prolyl-NHMe (49).** Prepared in 92% yield by hydrogenolysis of **48** (60 mg, 0.081 mmol) in MeOH (3 mL) as a white solid. This material was found to be >95% pure by  $^1\text{H}$  NMR and used without further purification: mp 139-142 °C;  $^1\text{H}$  NMR (400 MHz,  $\text{CD}_3\text{OD}$ ) (rotamers 20:80)  $\delta$  7.03 (d,  $J = 8.2$  Hz, 2 H), 6.71 (d,  $J = 8.2$  Hz, 2 H), 4.99-4.84 (app t,  $J = 6.8$  Hz, 1 H), 4.54-4.49 (m, 0.2 H), 4.45 (d,  $J = 7.5$  Hz, 0.8 H), 4.34 (dd,  $J = 8.2, 5.5$  Hz, 0.8 H), 4.28 (d,  $J = 7.5$  Hz, 0.2 H), 4.22-4.15 (m, 1 H), 3.87-3.77 (m, 0.8 H), 3.71-3.62 (m, 1 H), 3.59 (dd,  $J = 7.9, 4.8$  Hz, 1 H), 3.53-3.44 (m, 0.2 H), 2.96 (dd,  $J = 13.7, 4.8$  Hz, 1 H), 2.75-2.60 (comp, 6 H), 2.28-1.98 (comp, 4 H), 1.98-1.82 (comp, 2 H), 1.03-0.86 (comp, 12 H);  $^{13}\text{C}$  NMR (100 MHz)  $\delta$  176.9, 174.9, 174.7, 173.2, 172.7, 172.1, 157.3, 131.5, 129.3, 116.4, 61.7, 59.8, 58.0, 57.5,

51.5, 41.2, 37.8, 32.1, 31.7, 30.7, 26.3, 26.0, 19.83, 19.81, 18.7, 18.6; mass spectrum (ESI)  $m/z$  604.34532 [ $C_{29}H_{46}N_7O_7$  (M+H) requires 604.347].

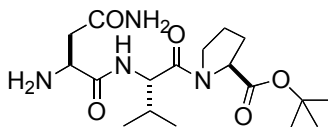

**34**

**Asparagyl-valyl-prolyl-O'Bu (34).** Prepared in 94% yield by hydrogenolysis of **33** (740 mg, 1.43 mmol) in MeOH (25 mL) as a white solid. The crude product was purified by flash chromatography, eluting with  $CH_2Cl_2/CH_3OH$  (9:1): mp 37-39 °C;  $^1H$  NMR (400 MHz,  $CDCl_3$ )  $\delta$  8.12 (d,  $J = 9.2$  Hz, 1 H), 6.33 (br s, 1 H), 5.74 (br s, 1 H), 4.55 (dd,  $J = 9.2, 6.7$  Hz, 1 H), 4.36 (dd,  $J = 8.8, 5.3$  Hz, 1 H), 3.85-3.78 (m, 1 H), 3.70 (m, 1 H), 3.67-3.62 (m, 1 H), 2.67 (dd,  $J = 15.1, 4.2$  Hz, 1 H), 2.59 (dd,  $J = 15.1, 7.5$  Hz, 1 H), 2.24-2.17 (m, 1 H), 2.15-2.08 (m, 1 H), 2.07-2.01 (m, 1 H), 2.01-1.87 (comp, 4 H), 1.45 (s, 9 H), 1.04 (d,  $J = 6.7$  Hz, 3 H), 0.93 (d,  $J = 6.7$  Hz, 3 H);  $^{13}C$  NMR (125 MHz)  $\delta$  174.1, 173.6, 171.4, 170.6, 81.6, 60.0, 55.7, 52.8, 47.5, 40.6, 31.4, 29.3, 28.2, 25.2, 19.7, 18.0; mass spectrum (ESI)  $m/z$  385.2442 [ $C_{18}H_{33}N_4O_5$  (M+H) requires 385.2446].

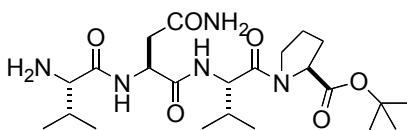

**36**

**Valyl-asparagyl-valyl-prolyl-O'Bu (36).** Prepared in 95% yield by hydrogenolysis of **35** (513 mg, 0.830 mmol) in MeOH (15 mL) as a white solid. This material was found to be >95% pure by  $^1H$  NMR and used without further purification: mp 81-83 °C;  $^1H$  NMR (400 MHz,  $CD_3OD$ )  $\delta$  4.76 (dd,  $J = 7.2, 5.9$  Hz, 1 H), 4.46 (d,  $J = 7.4$  Hz, 1 H), 4.30 (dd,  $J = 8.6, 5.3$  Hz, 1 H), 3.88-3.80 (m, 1 H), 3.70-3.62 (m, 1 H), 3.24 (d,  $J = 5.3$  Hz, 1 H), 2.70 (dd,  $J = 15.5, 5.9$  Hz, 1 H), 2.65 (dd,  $J = 15.5, 7.2$  Hz, 1 H), 2.28-2.17 (m, 1 H), 2.15-1.86 (comp, 5 H), 1.45 (s, 9 H), 1.06-0.90 (comp, 12 H);  $^{13}C$  NMR (125 MHz)  $\delta$  174.8, 173.6, 171.7, 171.6, 170.9, 81.4, 60.3, 60.0, 56.5, 50.2, 36.7, 31.7, 30.7, 29.0, 27.0, 24.7, 18.6, 18.5, 17.4, 16.5; mass spectrum (ESI)  $m/z$  484.3130 [ $C_{23}H_{42}N_5O_6$  (M+H) requires 484.3130].

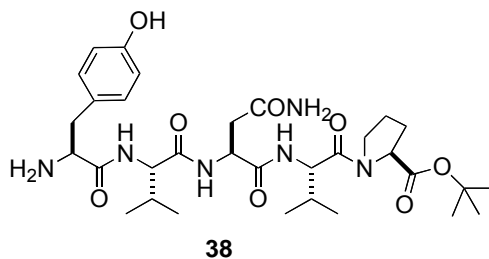

**Tyrosyl-valyl-asparagyl-valyl-prolyl-O'Bu (38).** Prepared in 81% yield by hydrogenolysis of **37** (104 mg, 0.133 mmol) in MeOH (10 mL) as a white solid. The crude product was purified by flash chromatography, eluting with CH<sub>2</sub>Cl<sub>2</sub>/CH<sub>3</sub>OH (9:1): mp 132-134 °C; <sup>1</sup>H NMR (500 MHz, CD<sub>3</sub>OD) δ 7.06-7.02 (comp, 2 H), 6.74-6.70 (comp, 2 H), 4.73 (app t, *J* = 6.8 Hz, 1 H), 4.44 (d, *J* = 7.6 Hz, 1 H), 4.29 (dd, *J* = 8.5, 5.1 Hz, 1 H), 4.18 (d, *J* = 6.8 Hz, 1 H), 3.85-3.78 (m, 1 H), 3.67-3.61 (comp, 2 H), 2.99 (dd, *J* = 13.8, 4.9 Hz, 1 H), 2.71 (dd, *J* = 13.8, 8.0 Hz, 1 H), 2.70 (dd, *J* = 15.6, 6.8 Hz, 1 H), 2.64 (dd, *J* = 15.6, 6.8 Hz, 1 H), 2.24-2.16 (m, 1 H), 2.14-1.86 (comp, 5 H), 1.44 (s, 9 H), 1.03 (d, *J* = 6.8 Hz, 3 H), 0.97 (d, *J* = 6.8 Hz, 3 H), 0.93 (d, *J* = 6.8 Hz, 3 H), 0.91 (d, *J* = 6.8 Hz, 3 H); <sup>13</sup>C NMR (125 MHz) δ 176.0, 174.7, 173.2, 172.8, 172.7, 171.9, 157.5, 131.5, 128.9, 116.5, 82.6, 61.4, 59.9, 57.7, 57.3, 51.5, 40.8, 37.7, 32.1, 31.8, 30.2, 28.2, 25.8, 19.8, 18.7, 18.6; mass spectrum (ESI) *m/z* 647.3767 [C<sub>32</sub>H<sub>51</sub>N<sub>6</sub>O<sub>8</sub> (M+H) requires 647.3763].

**General Procedure for removal of *tert*-butyl carbamate from peptides. Preparation of 10, 13, 20, 24, 30, 40, 47.**

Trifluoroacetic acid (TFA) (422 μL, 648 mg, 5.68 mmol) was added to a solution of *tert*-butyl carbamate (0.142 mmol) in CH<sub>2</sub>Cl<sub>2</sub> (1.5 mL) with stirring. The resulting solution was stirred at room temperature for 4 h, whereupon the volatiles were removed under reduced pressure. The residue was triturated with Et<sub>2</sub>O (4 x 2 mL) to produce a white solid, which was dried *in vacuo* to yield the trifluoroacetate (TFA) salt of the title compound. This material was shown to be >95% pure by <sup>1</sup>H NMR and was used without further purification.

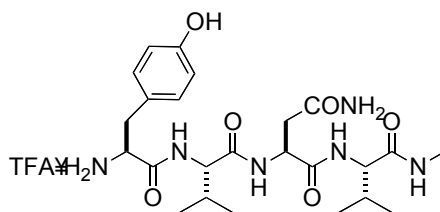

**30**

**Tyrosyl-valyl-aspargyl-valyl-NHMe (30).** Prepared from **29** according to the general procedure to yield 170 mg (99%) of the TFA salt of the title compound as a white solid. This material was shown to be >95% pure by  $^1\text{H}$  NMR and was used without further purification: mp 259-260 °C;  $^1\text{H}$  NMR (500 MHz,  $\text{DMSO}-d_6$ )  $\delta$  9.31 (s, 1 H), 8.50 (d, 9.1 Hz, 1 H), 8.35 (d,  $J = 7.4$  Hz, 1 H), 7.87-7.82 (m, 1 H), 7.69 (d,  $J = 8.9$  Hz, 1 H), 7.43 (br s, 1 H), 7.05-7.01 (comp, 2 H), 6.98 (br s, 1 H), 6.71-6.67 (comp, 2 H), 4.63 (app dd,  $J = 14.1, 7.4$  Hz, 1 H), 4.28 (dd,  $J = 9.1, 6.4$  Hz, 1 H), 4.08-3.98 (comp, 2 H), 2.97 (dd,  $J = 14.4, 4.5$  Hz, 1 H), 2.76 (dd,  $J = 14.4, 8.3$  Hz, 1 H), 2.62-2.54 (comp, 4 H), 2.42 (dd,  $J = 15.5, 6.5$  Hz, 1 H), 2.04-1.91 (comp, 2 H), 0.89-0.83 (comp, 6 H), 0.82-0.75 (comp, 6 H);  $^{13}\text{C}$  NMR (125 MHz)  $\delta$  171.7, 170.9, 170.7, 170.2, 156.5, 130.4, 124.8, 115.3, 78.0, 57.6, 57.3, 53.4, 49.6, 36.8, 36.4, 31.1, 30.0, 25.4, 19.1, 19.1, 17.8, 17.6; mass spectrum (ESI)  $m/z$  507.2926 [ $\text{C}_{24}\text{H}_{39}\text{N}_6\text{O}_6$  (M+H) requires 507.2950].

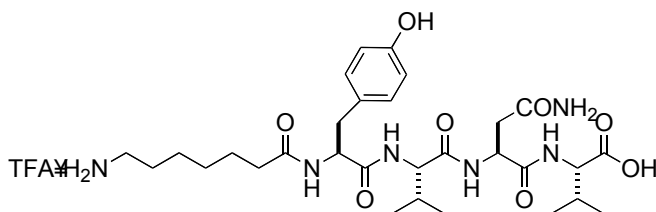

**20**

**6-Amino hexylcarbonyl-tyrosyl-valyl-aspargyl-valyl-NHMe (20).** Prepared from **19** according to the general procedure to yield 161 mg (96%) of the TFA salt of the title compound as a white solid. This material was shown to be >95% pure by  $^1\text{H}$  NMR and was used without further purification: mp 226-227 °C;  $^1\text{H}$  NMR (400 MHz,  $\text{CD}_3\text{OD}$ )  $\delta$  7.09-7.05 (comp, 2 H), 6.72-6.67 (comp, 2 H), 4.81-4.76 (m, 1 H), 4.62 (dd,  $J = 10.3, 5.0$  Hz, 1 H), 4.30 (d,  $J = 5.1$  Hz, 1 H), 4.22 (d,  $J = 6.8$  Hz, 1 H), 3.07 (dd,  $J = 14.4, 5.0$  Hz, 1 H), 2.92-2.85 (comp, 2 H), 2.78-2.70 (comp, 2 H), 2.65 (dd,  $J = 15.7, 7.2$  Hz, 1 H), 2.24-2.03 (comp, 4 H), 1.63-1.55 (comp, 2 H), 1.53-1.46 (comp, 2 H), 1.37-1.27 (comp, 2 H), 1.23-1.15 (comp, 2 H), 1.01-0.88 (comp, 12 H);  $^{13}\text{C}$  NMR (125 MHz)  $\delta$  176.1, 174.9, 174.4, 174.1, 173.1, 172.9, 157.1, 131.3, 129.4, 116.2, 59.9, 59.1, 56.2, 51.4, 40.7,

37.9, 37.8, 36.5, 32.3, 31.8, 29.3, 28.3, 27.0, 26.5, 19.9, 19.6, 18.5, 18.3; mass spectrum (ESI)  $m/z$  619.3460 [ $C_{30}H_{47}N_6O_8$  (M-H) requires 619.3461].

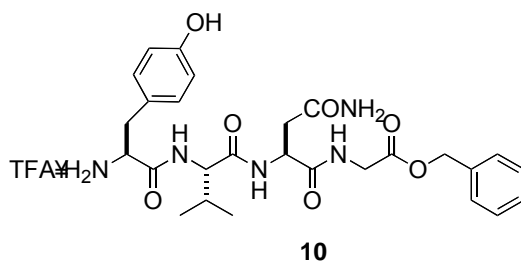

**Tyrosyl-valyl-aspargly-glycyl-OBn (10).** Prepared from **9** according to the general procedure to yield 179 mg (90%) of the TFA salt of the title compound as a white solid. This material was shown to be >90% pure by  $^1H$  NMR and was used without further purification: mp 187-190 °C;  $^1H$  NMR (400 MHz,  $CD_3OD$ )  $\delta$  7.38-7.26 (comp, 5 H), 7.13-7.08 (comp, 2 H), 6.81-6.76 (comp, 2 H), 5.15 (s, 2 H), 4.77 (dd,  $J = 7.2, 6.2$  Hz, 1 H), 4.20 (d,  $J = 7.2$  Hz, 1 H), 4.12 (dd,  $J = 8.9, 5.1$  Hz, 1 H), 4.04 (d,  $J = 17.6$  Hz, 1 H), 3.96 (d,  $J = 17.6$  Hz, 1 H), 3.20 (dd,  $J = 14.5, 5.1$  Hz, 1 H), 2.92 (dd,  $J = 14.5, 8.9$  Hz, 1 H), 2.78 (dd,  $J = 15.7, 6.2$  Hz, 1 H), 2.69 (dd,  $J = 15.7, 7.2$  Hz, 1 H), 2.16-2.03 (m, 1 H), 1.03-0.93 (comp, 6 H);  $^{13}C$  NMR (125 MHz)  $\delta$  174.7, 173.3, 172.8, 170.9, 170.2, 158.3, 137.2, 129.6, 129.3, 129.3, 126.0, 117.0, 67.9, 60.7, 55.7, 51.4, 42.2, 37.8, 37.8, 31.9, 19.7, 18.7; mass spectrum (ESI)  $m/z$  542.2609 [ $C_{27}H_{36}N_5O_7$  (M+H) requires 542.2627].

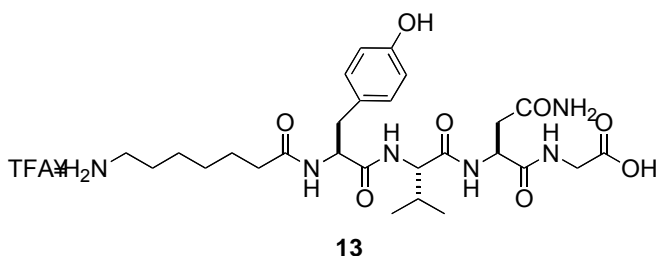

**6-Amino hexylcarbonyl-tyrosyl-valyl-aspargly-glycyl-OH (13).** Prepared from **12** according to the general procedure to yield 108 mg (100%) of the TFA salt of the title compound as a white solid. This material was shown to be >90% pure by  $^1H$  NMR and was used without further purification: mp 168-172 °C;  $^1H$  NMR (400 MHz,  $CD_3OD$ )  $\delta$  7.11-7.05 (comp, 2 H), 6.72-6.67 (comp, 2 H), 4.76 (app t,  $J = 7.1$  Hz, 1 H), 4.63 (dd,  $J = 10.3, 4.8$  Hz, 1 H), 4.15 (d,  $J = 6.5$  Hz, 1 H), 3.95 (d,  $J = 17.8$  Hz, 1 H), 3.87 (d,  $J = 17.8$  Hz, 1 H), 3.08 (dd,  $J = 14.4, 4.8$  Hz, 1 H), 2.93-2.73 (comp, 4 H), 2.69 (dd,  $J = 15.8, 7.1$  Hz, 1 H), 2.20-2.04 (comp, 3 H), 1.63-1.54 (comp, 2 H), 1.53-

1.45 (comp, 2 H), 1.36-1.26 (comp, 2 H), 1.25-1.17 (comp, 2 H), 0.98-0.90 (comp, 6 H);  $^{13}\text{C}$  NMR (100 MHz,  $\text{CD}_3\text{OD}$ )  $\delta$  176.1, 174.9, 174.5, 173.3, 173.2, 172.7, 157.1, 131.3, 129.3, 116.2, 60.4, 56.1, 51.4, 42.0, 40.6, 37.7, 36.5, 31.9, 29.3, 28.3, 27.0, 26.5, 19.7, 18.6; mass spectrum (ESI)  $m/z$  579.3137 [ $\text{C}_{27}\text{H}_{43}\text{N}_6\text{O}_8$  (M+H) requires 579.3157].

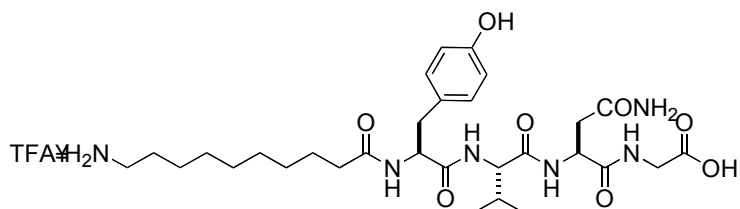

24

**9-Amino nonylcarbonyl-tyrosyl-valyl-aspargyl-glycyl-OH (24).** Prepared from **23** according to the general procedure to yield 85 mg (99%) of the TFA salt of the title compound as a white solid. This material was shown to be >90% pure by  $^1\text{H}$  NMR and was used without further purification: mp 177-180 °C;  $^1\text{H}$  NMR (400 MHz,  $\text{CD}_3\text{OD}$ )  $\delta$  7.07 (d,  $J = 8.5$  Hz, 2 H), 6.68 (d,  $J = 8.5$  Hz, 2 H), 4.77 (app t,  $J = 6.2$  Hz, 1 H), 4.63 (dd,  $J = 9.9, 4.8$  Hz, 1 H), 4.14 (d,  $J = 6.5$  Hz, 1 H), 3.93 (d,  $J = 17.8$  Hz, 1 H), 3.87 (d,  $J = 17.8$  Hz, 1 H), 3.07 (dd,  $J = 14.4, 4.8$  Hz, 1 H), 2.94-2.86 (comp, 3 H), 2.78 (dd,  $J = 15.8, 6.2$  Hz, 1 H), 2.68 (dd,  $J = 15.7, 6.2$  Hz, 1 H), 2.19-2.05 (comp, 3 H), 1.68-1.58 (comp, 2 H), 1.53-1.42 (comp, 2 H), 1.41-1.11 (comp, 10 H), 0.97 (d,  $J = 6.5$  Hz, 3 H), 0.93 (d,  $J = 6.5$  Hz, 3 H);  $^{13}\text{C}$  NMR (150 MHz,  $\text{CD}_3\text{OD}$ )  $\delta$  176.3, 174.9, 174.6, 173.2, 173.1, 173.0, 157.2, 131.3, 129.3, 116.2, 60.5, 56.1, 51.4, 42.3, 40.8, 37.7, 37.6, 36.8, 31.9, 30.21, 30.17, 30.1, 29.9, 28.6, 27.4, 26.8, 19.7, 18.6; mass spectrum (ESI)  $m/z$  621.3608 [ $\text{C}_{30}\text{H}_{49}\text{N}_6\text{O}_8$  (M+H) requires 621.3606].

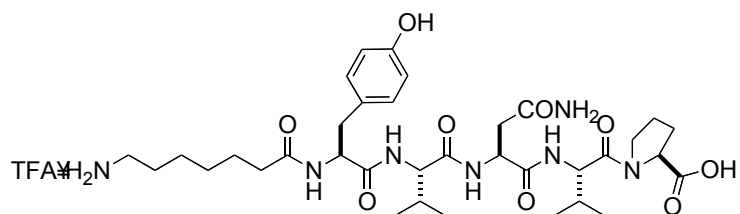

40

**6-Amino hexylcarbonyl-tyrosyl-valyl-aspargyl-valyl-prolyl-OH (40).** Prepared from **39** according to the general procedure to yield 97 mg (98%) of the TFA salt of the title compound as a

white solid. This material was shown to be >90% pure by  $^1\text{H}$  NMR and was used without further purification: mp 138-141 °C;  $^1\text{H}$  NMR (400 MHz,  $\text{CD}_3\text{OD}$ )  $\delta$  7.08 (d,  $J = 8.5$  Hz, 2 H), 6.70 (d,  $J = 8.5$  Hz, 2 H), 4.74 (app t,  $J = 6.5$  Hz, 1 H), 4.66 (dd,  $J = 10.3, 4.8$  Hz, 1 H), 4.46 (d,  $J = 7.9$  Hz, 1 H), 4.44-4.38 (m, 1 H), 4.19 (d,  $J = 6.8$  Hz, 1 H), 3.88-3.80 (m, 1 H), 3.73-3.65 (m, 1 H), 3.09 (dd,  $J = 14.0, 4.8$  Hz, 1 H), 2.92-2.85 (comp, 2 H), 2.80-2.70 (comp, 2 H), 2.66 (dd,  $J = 15.4, 6.5$  Hz, 1 H), 2.29-1.94 (comp, 8 H), 1.65-1.56 (comp, 2 H), 1.54-1.46 (comp, 2 H), 1.37-1.28 (comp, 2 H), 1.24-1.15 (comp, 2 H), 1.03 (d,  $J = 6.8$  Hz, 3 H), 1.00-0.90 (comp, 9 H);  $^{13}\text{C}$  NMR (125 MHz,  $\text{CD}_3\text{OD}$ )  $\delta$  176.0, 175.2, 174.8, 174.3, 173.1, 172.6, 172.1, 157.1, 131.3, 129.4, 116.2, 60.5, 60.1, 57.8, 56.1, 51.5, 40.7, 37.9, 37.7, 36.5, 32.1, 31.9, 30.2, 29.3, 28.3, 27.0, 26.5, 25.9, 19.8, 19.6, 18.8, 18.6; mass spectrum (ESI)  $m/z$  718.4136 [ $\text{C}_{35}\text{H}_{56}\text{N}_7\text{O}_9$  (M+H) requires 718.4134].

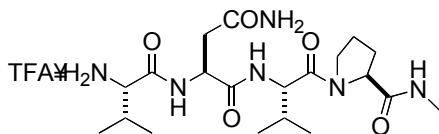

47

**Valyl-asparagyl-valyl-prolyl-NHMe (47).** Prepared from **46** according to the general procedure to yield 87 mg (88%) of the TFA salt of the title compound as a white solid. This material was shown to be >90% pure by  $^1\text{H}$  NMR and was used without further purification: mp 148-150 °C;  $^1\text{H}$  NMR (400 MHz,  $\text{CD}_3\text{OD}$ ) (rotamers 20:80)  $\delta$  4.96-4.90 (m, 1 H), 4.53 (d,  $J = 7.0$  Hz, 1 H), 4.36-4.28 (m, 1 H), 3.87-3.79 (m, 1 H), 3.73-3.61 (comp, 1.8 H), 3.54-3.46 (m, 1 H), 2.81-2.67 (comp, 4 H), 2.60 (dd,  $J = 15.5, 7.6$  Hz, 1 H), 2.30-2.01 (comp, 4 H), 2.00-1.83 (comp, 2 H), 1.10-0.90 (comp, 12 H);  $^{13}\text{C}$  NMR (100 MHz,  $\text{CD}_3\text{OD}$ )  $\delta$  173.7, 173.2, 171.4, 171.1, 168.4, 60.7, 58.4, 56.5, 50.5, 36.6, 30.7, 30.4, 29.5, 25.2, 24.9, 18.7, 17.6, 17.3, 16.9; mass spectrum (ESI)  $m/z$  441.2820 [ $\text{C}_{20}\text{H}_{37}\text{N}_6\text{O}_5$  (M+H) requires 441.2837].

**General procedure for the deprotection of C-terminal benzyl ester protected macrocycle precursors. Preparation of 12, 23.**

The benzyl ester (0.012 mmol) was dissolved in MeOH/ $\text{H}_2\text{O}$  (4 mL, 3:1) containing 10% Pd/C (1 mg, 10 mol %). The resulting mixture was purged four times with  $\text{H}_2$ , and the suspension as stirred under  $\text{H}_2$  (1 atm) for 6 h. The mixture was filtered through a pad of celite, and the pad was washed with MeOH (5 mL) and  $\text{H}_2\text{O}$  (2 mL). The combined filtrate and washings were concentrated to dryness under reduced pressure. If the material was not found to be >95 % pure by



<sup>1</sup>H NMR, the crude product was purified using flash chromatography, or preparative RP HPLC using a binary gradient of solvents, A and B (given).

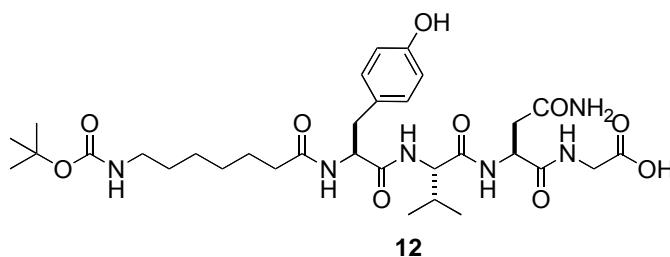

**(6-*N*-Boc-hexylcarbonyl)-tyrosyl-valyl-asparagyl-glycyl-OH (12).** Prepared from **11** according to the general procedure to yield 106 mg (92%) of the title compound as a white solid. The crude material was purified by preparative RP HPLC with a gradient of 0% B to 55% B over 30 min: mp 212-214 °C; <sup>1</sup>H NMR (400 MHz, CD<sub>3</sub>OD) δ 7.11-7.05 (comp, 2 H), 6.72-6.66 (comp, 2 H), 4.75 (app t, *J* = 7.0 Hz, 1 H), 4.64 (dd, *J* = 9.9, 5.0 Hz, 1 H), 4.17-4.12 (m, 1 H), 3.95 (d, *J* = 18.5 Hz, 1 H), 3.86 (d, *J* = 18.5 Hz, 1 H), 3.06 (dd, *J* = 14.0, 5.0 Hz, 1 H), 3.01-2.85 (comp, 2 H), 2.82-2.74 (comp, 2 H), 2.68 (dd, *J* = 15.8, 7.0 Hz, 1 H), 2.20-2.04 (comp, 3 H), 1.63-1.08 (comp, 17 H), 0.98-0.91 (comp, 6 H); <sup>13</sup>C NMR (125 MHz, CD<sub>3</sub>OD) δ 176.3, 174.9, 174.5, 173.2, 173.1, 172.7, 158.6, 157.2, 131.3, 129.3, 116.2, 79.8, 60.5, 56.0, 51.4, 42.0, 41.3, 37.7, 37.6, 36.8, 31.9, 30.8, 29.7, 28.8, 27.5, 26.9, 19.7, 18.6; mass spectrum (ESI) *m/z* 677.3516 [C<sub>32</sub>H<sub>49</sub>N<sub>6</sub>O<sub>10</sub> (M-1) requires 677.3516].

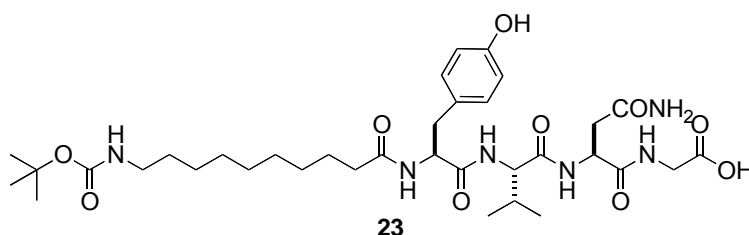

**(9-*N*-Boc-nonylcarbonyl)-tyrosyl-valyl-asparagyl-glycyl-OH (23).** Prepared from **22** according to the general procedure to yield 7 mg (78%) of the title compound as a white solid. It was found to be > 95% pure by <sup>1</sup>H NMR and used without further purification: mp 200-202 °C; <sup>1</sup>H NMR (500 MHz, CD<sub>3</sub>OD) δ 7.06 (d, *J* = 8.5 Hz, 2 H), 6.68 (d, *J* = 8.5 Hz, 2 H), 4.76 (app t, *J* = 6.1 Hz, 1 H), 4.63 (dd, *J* = 9.9, 4.9 Hz, 1 H), 4.14 (d, *J* = 6.8 Hz, 1 H), 3.92 (d, *J* = 17.8 Hz, 1 H), 3.86 (d, *J* = 17.8 Hz, 1 H), 3.06 (dd, *J* = 14.1, 4.9 Hz, 1 H), 3.00 (app t, *J* = 7.1 Hz, 1 H), 2.82-2.73

(comp, 2 H), 2.68 (dd,  $J = 15.5, 7.1$  Hz, 1 H), 2.17-2.04 (comp, 3 H), 1.51-1.38 (comp, 13 H), 1.32-1.10 (comp, 10 H), 0.94 (app t,  $J = 6.8$  Hz, 6 H);  $^{13}\text{C}$  NMR (125 MHz)  $\delta$  176.4, 174.9, 174.6, 173.2, 173.0, 158.6, 157.2, 131.2, 129.3, 116.2, 79.8, 60.5, 56.0, 51.4, 42.4, 41.4, 37.7, 37.6, 36.9, 31.9, 31.0, 30.5, 30.4, 30.3, 30.1, 28.8, 27.9, 26.9, 19.7, 18.6; mass spectrum (ESI)  $m/z$  719.3974 [ $\text{C}_{35}\text{H}_{55}\text{N}_6\text{O}_{10}$  (M-H) requires 719.3974].

**General procedure for macrocyclization of the free amino acid. Preparation of 14, 21, 25, 41.**

A solution of the free amino acid (0.0386 mmol), pentafluorophenyl diphenylphosphinate (FDPP) (30 mg, 0.077 mmol), and NMM (20 mg, 21  $\mu\text{L}$ , 0.193 mmol), in DMF (38 mL) was stirred at room temperature for 48 h. The volatiles were removed under reduced pressure, and the residue was purified via preparative RP HPLC with a binary gradient of solvents, A and B (given).

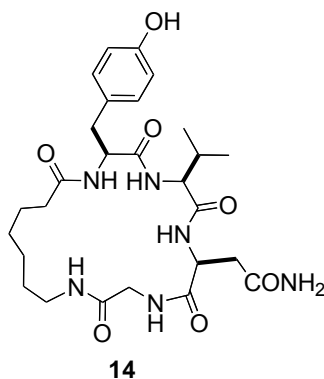

**Cyclo-[6-amino-(hexylcarbonyl)-tyrosyl-valyl-asparagyl-glycyl] (14).** Prepared from **13** according to the general procedure to yield 45 mg (53%) of the title compound as a white solid. The residue was purified via preparative RP HPLC with a gradient of 0% B to 50% B over 30 min: mp 160-164  $^{\circ}\text{C}$ ;  $^1\text{H}$  NMR (500 MHz,  $\text{CD}_3\text{OD}$ )  $\delta$  7.08-7.04 (comp, 2 H), 6.71-6.67 (comp, 2 H), 4.46 (dd,  $J = 10.9, 4.0$  Hz, 1 H), 4.40 (t,  $J = 6.9$  Hz, 1 H), 4.33 (d,  $J = 5.9$  Hz, 1 H), 4.08 (d,  $J = 17.1$  Hz, 1 H), 3.53 (d,  $J = 17.1$  Hz, 1 H), 3.34-3.28 (m, 1 H), 3.23 (dd,  $J = 14.4, 4.0$  Hz, 1 H), 3.06 (ddd,  $J = 12.7, 7.9, 4.4$  Hz, 1 H), 2.81 (dd,  $J = 14.4, 10.9$  Hz, 1 H), 2.72-2.63 (comp, 2 H), 2.21-2.10 (comp, 2 H), 2.08-1.99 (m, 1 H), 1.73-1.43 (comp, 6 H), 1.40-1.31 (comp, 2 H), 0.97 (d,  $J = 6.8$  Hz, 3 H), 0.93 (d,  $J = 6.8$  Hz, 3 H);  $^{13}\text{C}$  NMR (125 MHz)  $\delta$  171.1, 174.0, 173.9, 173.7, 173.5, 171.8, 157.3, 131.0, 129.5, 116.3, 58.9, 57.5, 53.4, 43.8, 39.4, 37.4, 36.9, 36.8, 33.4, 29.1, 29.0, 26.6, 26.4, 19.6, 18.4; mass spectrum (ESI)  $m/z$  559.2875 [ $\text{C}_{27}\text{H}_{39}\text{N}_6\text{O}_7$  (M-H) requires 559.2870].

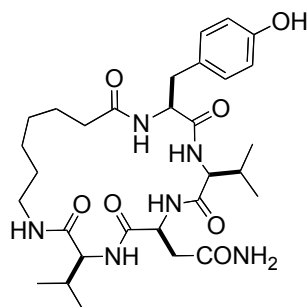

21

**Cyclo-[6-amino-(hexylcarbonyl)-tyrosyl-valyl-asparagyl-valyl] (21).** Prepared from **20** according to the general procedure to yield 39 mg (48%) of the title compound as a white solid. The residue was purified via preparative RP HPLC with a gradient of 0% B to 60% B over 30 min: mp 162-165 °C; <sup>1</sup>H NMR (500 MHz, CD<sub>3</sub>OD) δ 7.17-7.13 (comp, 2 H), 6.76-6.72 (comp, 2 H), 4.64 (dd, *J* = 11.3, 3.8 Hz, 1 H), 4.49 (t, *J* = 5.3 Hz, 1 H), 4.17 (d, *J* = 8.5 Hz, 1 H), 3.95 (d, *J* = 5.0 Hz, 1 H), 3.54 (ddd, *J* = 13.5, 6.3, 3.2 Hz, 1 H), 3.35-3.30 (m, 1 H), 2.94 (dd, *J* = 16.0, 5.3 Hz, 1 H), 2.87 (ddd, *J* = 13.5, 9.1, 2.6 Hz, 1 H), 2.81 (dd, *J* = 14.9, 11.3 Hz, 1 H), 2.66 (dd, *J* = 16.0, 5.3 Hz, 1 H), 2.28 (ddd, *J* = 14.9, 10.9, 4.2 Hz, 1 H), 2.23-2.11 (comp, 3 H), 1.86-1.77 (m, 1 H), 1.61-1.49 (comp, 2 H), 1.46-1.38 (comp, 1 H), 1.38-1.26 (comp, 4 H), 1.07-1.02 (comp, 6 H), 1.00-0.95 (comp, 6 H); <sup>13</sup>C NMR (125 MHz) δ 177.4, 176.9, 175.1, 173.5, 173.3, 172.5, 157.4, 130.9, 129.3, 116.3, 62.8, 61.9, 56.5, 53.1, 39.9, 37.3, 35.7, 35.1, 32.5, 31.2, 30.4, 29.1, 27.1, 26.2, 19.9, 19.4, 19.3, 18.9; mass spectrum (ESI) *m/z* 603.3509 [C<sub>30</sub>H<sub>47</sub>N<sub>6</sub>O<sub>7</sub> (M+H) requires 603.3506].

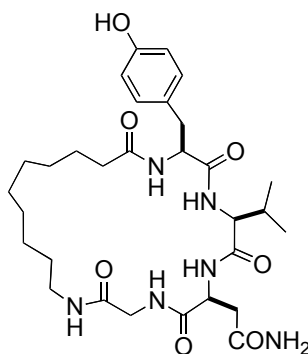

25

**Cyclo-[9-amino-(nonylcarbonyl)-tyrosyl-valyl-asparagyl-glycyl] (25).** Prepared in approximately 50% yield as a white solid from **24** according to the general procedure; purified via preparative RP HPLC with a gradient of 0% B to 65% B over 30 min. Could not remove the by-

product produced by FDPP, so the yield is not accurate and clean spectra could not be obtained. Carried on for phosphorylation so separation could be carried out at that stage.

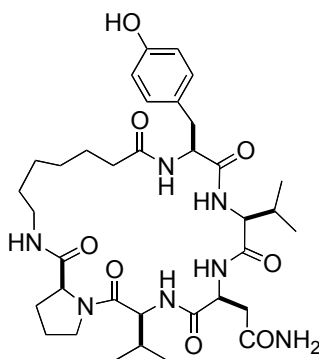

41

**Cyclo-[6-amino-(hexylcarbonyl)-tyrosyl-valyl-asparagyl-valyl-prolyl] (41).** Prepared from **40** according to the general procedure to yield 70 mg (84%) of the title compound as a white solid. The residue was purified via preparative RP HPLC with a gradient of 0% B to 60% B over 30 min: mp 171-172 °C; <sup>1</sup>H NMR (500 MHz, CD<sub>3</sub>OD) (rotamers 1:9) δ 7.10 (d, *J* = 8.6 Hz, 1.8 H), 7.05 (d, *J* = 8.6 Hz, 0.2 H), 6.69 (d, *J* = 8.6 Hz, 2 H), 4.68 (dd, *J* = 9.6, 5.6 Hz, 0.9 H), 4.56 (d, *J* = 8.7 Hz, 0.9 H), 4.53-4.49 (comp, 1 H), 4.43-4.39 (m, 0.1 H), 4.35 (dd, *J* = 8.2, 5.9 Hz, 0.9 H), 4.25 (d, *J* = 5.4 Hz, 0.1 H), 4.15 (d, *J* = 6.9 Hz, 0.1 H), 3.78-3.66 (comp, 3 H), 3.57-3.52 (m, 1 H), 3.15-3.09 (comp, 1 H), 3.02 (dd, *J* = 16.1, 7.2 Hz, 1 H), 2.92-2.76 (comp, 3 H), 2.28-2.00 (comp, 6 H), 1.96-1.84 (comp, 2 H), 1.64-1.22 (comp, 8 H), 1.94-0.88 (comp, 12 H); <sup>13</sup>C NMR (500 MHz, DMSO-*d*<sub>6</sub>, 403 K) δ 171.9, 171.2, 171.1, 170.4, 170.0, 169.5, 169.0, 155.2, 129.1, 127.7, 114.5, 59.5, 55.2, 50.2, 46.3, 38.0, 36.0, 35.1, 30.2, 29.4, 27.9, 27.7, 24.9, 24.3, 18.6, 18.5, 17.1, 17.0; mass spectrum (ESI) *m/z* 698.3872 [C<sub>35</sub>H<sub>52</sub>N<sub>7</sub>O<sub>8</sub> (M+H) requires 698.3884].

**General procedure for *O*-phosphorylation of tyrosine. Preparation of 1–8.**

1-*H*-Tetrazole (11 mg, 0.155 mmol) and dibenzyl diisopropylphosphoramidite (**75**) (43 mg, 42 μL, 0.124 mmol) were added to a solution of the tyrosine-peptide (0.031 mmol) in DMF (10 mL) at 0 °C, and the solution was stirred at 0 °C for 1 h and at room temperature for 15 h. The solution was cooled to 0 °C, and 6 M *tert*-butyl hydroperoxide in decane (119 μL) was added. The resulting solution was stirred at 0 °C for 30 min and then at room temperature for 5 h, whereupon it was cooled to 0 °C and 5% aqueous NaHSO<sub>3</sub> (1.4 mL) added. The solution was stirred at 0 °C for 30 min and at room temperature for 2 h. The mixture was transferred to a separatory funnel containing H<sub>2</sub>O

(10 mL), and the layers were separated. The aqueous layer was extracted with CH<sub>2</sub>Cl<sub>2</sub> (20 mL). DMF (5 mL) was added to the aqueous layer, which was again extracted with CH<sub>2</sub>Cl<sub>2</sub> (15 mL); this was repeated one more time, whereupon a final extraction of the aqueous layer with CH<sub>2</sub>Cl<sub>2</sub> (15 mL) was performed. The organic layers were combined and concentrated to dryness under reduced pressure. The residue was triturated with Et<sub>2</sub>O (4 x 3 mL) to yield 24 mg of the crude benzyl protected phosphotyrosine ligand as a white solid. The crude product (24 mg, 0.0265 mmol) was dissolved in MeOH/H<sub>2</sub>O (18 mL, 15:3) containing 10% Pd/C (3 mg), and the mixture was purged four times with H<sub>2</sub>. The suspension was stirred under H<sub>2</sub> (1 atm) for 14 h. The mixture was filtered through a pad of celite, and the pad was washed with MeOH (10 mL). The combined filtrate and washings were concentrated under reduced pressure to give a solid that was purified via preparative RP HPLC using a binary gradient of solvents, A and B (given).

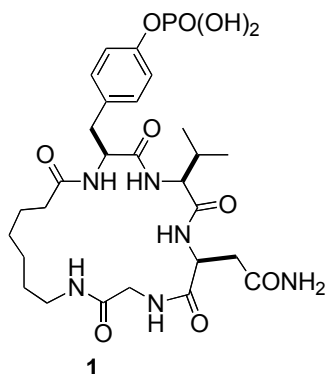

**Cyclo-[6-amino-(hexylcarbonyl)-O-phosphotyrosyl-valyl-asparagyl-glycyl] (1).** Prepared from **14** according to the general procedure to yield 16 mg (50%) of the title compound as a white solid over two-steps. The crude material was purified via preparative RP HPLC using a gradient of 0% B to 50% B over 30 min: mp 178-182 °C; <sup>1</sup>H NMR (500 MHz, CD<sub>3</sub>OD) δ 7.25-7.21 (comp, 2 H), 7.14-7.10 (comp, 2 H), 4.52 (dd, *J* = 11.1, 3.8 Hz, 1 H), 4.40 (t, *J* = 7.0 Hz, 1 H), 4.34 (d, *J* = 6.0 Hz, 1 H), 4.07 (d, *J* = 17.1 Hz, 1 H), 3.54 (d, *J* = 17.1 Hz, 1 H), 3.36-3.27 (comp, 2 H), 3.07 (ddd, *J* = 12.9, 7.8, 4.4 Hz, 1 H), 2.88 (dd, *J* = 14.4, 11.1 Hz, 1 H), 2.70-2.60 (comp, 2 H), 2.20-2.08 (comp, 2 H), 2.07-2.00 (m, 1 H), 1.73-1.45 (comp, 6 H), 1.40-1.32 (comp, 2 H), 0.98 (d, *J* = 6.8 Hz, 3 H), 0.94 (d, *J* = 6.8 Hz, 3 H); <sup>13</sup>C NMR (125 MHz) δ 177.1, 174.0, 173.5, 173.5, 171.8, 151.7, 135.3, 131.2, 121.4, 121.3, 59.0, 57.2, 53.4, 43.8, 39.5, 37.4, 36.9, 36.8, 33.5, 29.2, 29.0, 26.6, 26.4, 19.6, 18.5; mass spectrum (ESI) *m/z* 639.2538 [C<sub>27</sub>H<sub>40</sub>N<sub>6</sub>O<sub>10</sub>P (M-H) requires 639.2550].

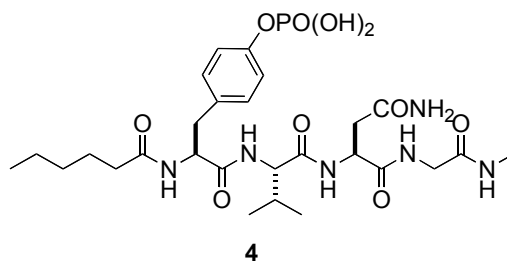

**Pentylcarbonyl-*O*-phosphotyrosyl-valyl-asparagyl-glycyl-NHMe (4).** Prepared from **28** according to the general procedure to yield 10 mg (24%) of the title compound as a white solid over two-steps. The crude material was purified via preparative RP HPLC using a gradient of 0% B to 60% B over 30 min: mp 205-208 °C; <sup>1</sup>H NMR (500 MHz, CD<sub>3</sub>OD) δ 7.24-7.20 (comp, 2 H), 7.14-7.10 (comp, 2 H), 4.66 (dd, *J* 9.9, 5.2 Hz, 1 H), 4.60 (t, *J* = 6.5 Hz, 1 H), 4.10 (d, *J* = 6.9 Hz, 1 H), 3.85 (d, *J* = 17.0 Hz, 1 H), 3.79 (d, *J* = 17.0 Hz, 1 H), 3.10 (dd, *J* = 14.0, 5.2 Hz, 1 H), 2.86-2.72 (comp, 3 H), 2.70 (s, 3 H), 2.13 (td, *J* = 7.5, 1.6 Hz, 2 H), 2.09-2.02 (m, 1 H), 1.48 (p, *J* = 15.3, 7.5 Hz, 2 H), 1.31-1.23 (comp, 2 H), 1.21-1.14 (comp, 2 H), 0.98-0.92 (comp, 6 H), 0.86 (t, *J* = 7.2 Hz, 3 H); <sup>13</sup>C NMR (125 MHz) δ 176.4, 175.0, 174.4, 173.7, 173.5, 172.2, 151.7, 134.8, 131.4, 121.3, 121.2, 60.6, 55.7, 52.0, 43.8, 37.7, 37.3, 36.7, 32.4, 31.8, 26.6, 26.3, 23.4, 19.6, 18.7, 14.2; mass spectrum (ESI) *m/z* 643.2858 [C<sub>27</sub>H<sub>44</sub>N<sub>6</sub>O<sub>10</sub>P (M+H) requires 643.2857].

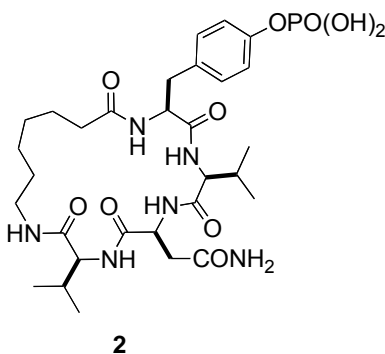

**Cyclo-[6-amino-(hexylcarbonyl)-*O*-phosphotyrosyl-valyl-asparagyl-valyl] (2).** Prepared from **21** according to the general procedure to yield 12 mg (37%) of the title compound as a white solid over two-steps. The crude material was purified via preparative RP HPLC using a gradient of 0% B to 50% B over 30 min: mp 199-202 °C; <sup>1</sup>H NMR (500 MHz, CD<sub>3</sub>OD) δ 7.35-7.30 (comp, 2 H), 7.18-7.13 (comp, 2 H), 4.69 (dd, *J* = 11.4, 3.3 Hz, 1 H), 4.48 (t, *J* = 5.1 Hz, 1 H), 4.17 (d, *J* = 8.5 Hz, 1 H), 3.96 (d, *J* = 5.1 Hz, 1 H), 3.54 (ddd, *J* = 13.4, 6.6, 3.5 Hz, 1 H), 3.42 (dd, *J* = 15.3, 3.3 Hz, 1 H), 2.96 (dd, *J* = 16.0, 5.1 Hz, 1 H), 2.92-2.84 (comp, 2 H), 2.66 (dd, *J* = 16.0, 5.1 Hz, 1 H), 2.28

(ddd,  $J = 14.4, 10.6, 4.1$  Hz, 1 H), 2.22-2.09 (comp, 3 H), 1.87-1.77 (m, 1 H), 1.62-1.49 (comp, 2 H), 1.47-1.38 (comp, 1 H), 1.38-1.26 (comp, 4 H), 1.09-1.03 (comp, 6 H), 1.01-0.95 (comp, 6 H);  $^{13}\text{C}$  NMR (125 MHz)  $\delta$  177.2, 177.0, 175.2, 173.5, 173.3, 172.5, 151.8, 135.0, 131.0, 121.4, 62.8, 61.9, 56.3, 53.1, 39.9, 37.4, 35.6, 35.1, 32.5, 31.2, 30.4, 29.1, 27.1, 26.2, 20.0, 19.4, 19.4, 18.9; mass spectrum (ESI)  $m/z$  681.3044 [ $\text{C}_{30}\text{H}_{46}\text{N}_6\text{O}_{10}\text{P}$  (M-H) requires 681.3013].

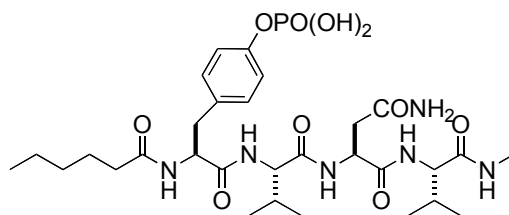

5

**Pentylcarbonyl-*O*-phosphotyrosyl-valyl-asparagyl-valyl-NHMe (5).** Prepared from **31** according to the general procedure to yield 4 mg (11%) of the title compound as a white solid over two-steps. The crude material was purified via preparative RP HPLC using a gradient of 0% B to 50% B over 30 min: mp 199-202 °C;  $^1\text{H}$  NMR (500 MHz,  $\text{D}_2\text{O}$ )  $\delta$  7.14-7.10 (comp, 2 H), 7.06-7.02 (comp, 2 H), 4.63 (app t,  $J = 7.0$  Hz, 1 H), 4.53 (dd,  $J = 8.6, 6.4$  Hz, 1 H), 3.99 (d,  $J = 7.8$  Hz, 1 H), 3.95 (d,  $J = 7.0$  Hz, 1 H), 3.00 (dd,  $J = 14.0, 6.4$  Hz, 1 H), 2.87 (dd,  $J = 14.0, 8.6$  Hz, 1 H), 2.74 (dd,  $J = 15.3, 7.0$  Hz, 1 H), 2.67-2.61 (comp, 4 H), 2.12 (t,  $J = 7.2$  Hz, 2 H), 2.06-1.98 (m, 1 H), 1.94-1.87 (m, 1 H), 1.44-1.37 (comp, 2 H), 1.18-1.12 (comp, 2 H), 1.08-1.02 (comp, 2 H), 0.85-0.77 (comp, 12 H), 0.74 (t,  $J = 7.2$  Hz, 3 H);  $^{13}\text{C}$  NMR (125 MHz,  $\text{DMSO-}d_6$ )  $\delta$  172.3, 171.8, 171.3, 171.1, 170.8, 170.6, 150.2, 133.3, 130.0, 119.51, 119.47, 57.7, 57.2, 53.7, 49.6, 36.9, 36.2, 35.1, 31.0, 30.7, 29.9, 25.5, 24.9, 21.8, 19.2, 19.1, 17.8, 17.6, 13.8; mass spectrum (ESI)  $m/z$  683.3152 [ $\text{C}_{30}\text{H}_{48}\text{N}_6\text{O}_{10}\text{P}$  (M-H) requires 683.3170].

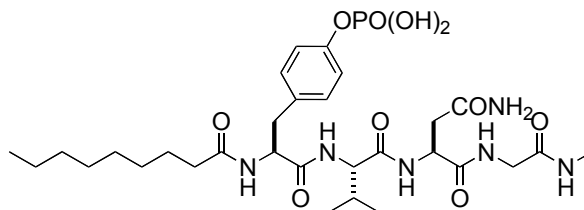

6

**Octylcarbonyl-*O*-phosphotyrosyl-valyl-asparagyl-glycyl-NHMe (6).** Prepared from **32** according to the general procedure to yield 8 mg (37%) of the title compound as a white solid over

two-steps. The crude material was purified via preparative RP HPLC using a gradient of 10% B to 70% B over 30 min: mp 220-221 °C (dec); <sup>1</sup>H NMR (500 MHz, CD<sub>3</sub>OD) δ 7.24-7.20 (comp, 2 H), 7.14-7.10 (comp, 2 H), 4.66 (dd, *J* = 9.6, 5.2 Hz, 1 H), 4.60 (app t, *J* = 6.5 Hz, 1 H), 4.10 (d, *J* = 6.9 Hz, 1 H), 3.86 (d, *J* = 17.0 Hz, 1 H), 3.79 (d, *J* = 17.0 Hz, 1 H), 3.10 (dd, *J* = 14.2, 5.1 Hz, 1 H), 2.83 (dd, *J* = 14.2, 9.6 Hz, 1 H), 2.81 (dd, *J* = 15.7, 6.5 Hz, 1 H), 2.76 (dd, *J* = 15.7, 6.5 Hz, 1 H), 2.70 (s, 3 H), 2.17-2.11 (comp, 2 H), 2.10-2.03 (m, 1 H), 1.52-1.44 (comp, 2 H), 1.34-1.16 (comp, 10 H), 0.98-0.92 (comp, 6 H), 0.88 (t, *J* = 7.1 Hz, 3 H); <sup>13</sup>C NMR (125 MHz) δ 176.4, 175.0, 174.3, 173.7, 173.4, 172.2, 151.7, 134.8, 131.4, 121.3, 121.2, 60.6, 56.0, 52.0, 43.8, 37.7, 37.3, 36.8, 33.0, 31.8, 30.4, 30.3, 30.2, 26.9, 26.3, 23.7, 19.6, 18.7, 14.4; mass spectrum (ESI) *m/z* 685.3326 [C<sub>30</sub>H<sub>50</sub>N<sub>6</sub>O<sub>10</sub>P (M+H) requires 685.3326].

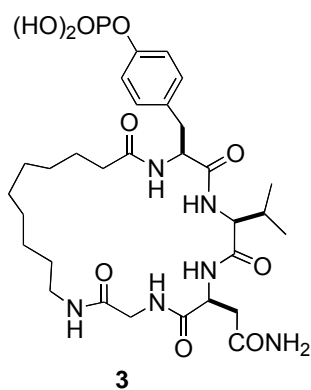

**Cyclo-[9-amino-(nonylcarbonyl)-O-phosphotyrosyl-valyl-asparagyl-glycyl] (3).** Prepared from **25** according to the general procedure to yield 9 mg (22%) of the title compound as a white solid over two-steps. The crude material was purified via preparative RP HPLC using a gradient of 0% B to 60% B over 30 min: mp 190-192 °C; <sup>1</sup>H NMR (500 MHz, CD<sub>3</sub>OD) δ 7.24 (d, *J* = 8.4 Hz, 2 H), 7.11 (dd, *J* = 8.4, 1.0 Hz, 2 H), 4.66 (dd, *J* = 10.0, 5.1 Hz, 1 H), 4.50 (app t, *J* = 6.6 Hz, 1 H), 4.07 (d, *J* = 7.3 Hz, 1 H), 3.89 (d, *J* = 17.1 Hz, 1 H), 3.75 (d, *J* = 17.1 Hz, 1 H), 3.30-3.20 (comp, 2 H), 3.14-3.06 (m, 1 H), 2.88 (dd, *J* = 14.2, 10.0 Hz, 1 H), 2.70 (d, *J* = 6.6 Hz, 2 H), 2.22-2.16 (m, 1 H), 2.13-2.00 (comp, 2 H), 1.70-1.62 (m, 1 H), 1.56-1.46 (comp, 3 H), 1.37-1.22 (comp, 10 H), 0.98 (d, *J* = 2.7 Hz, 3 H), 0.97 (d, *J* = 2.7 Hz, 3 H); <sup>13</sup>C NMR (125 MHz) δ 176.7, 174.4, 174.1, 173.9, 173.7, 171.4, 151.6, 135.3, 131.4, 121.3, 61.0, 55.8, 52.8, 43.8, 40.3, 36.8, 36.6, 36.2, 32.4, 29.6, 29.3, 29.1, 29.0, 27.0, 26.2, 19.5, 19.2; mass spectrum (ESI) *m/z* 681.3011 [C<sub>30</sub>H<sub>46</sub>N<sub>6</sub>O<sub>10</sub>P (M-H) requires 681.3018].



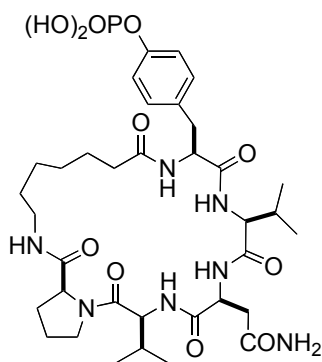

7

**Cyclo-[6-amino-(hexanoyl)-*O*-phosphotyrosyl-valyl-asparagyl-valyl-prolyl] (7).**

Prepared from **41** according to the general procedure to yield 9 mg (64%) of the title compound as a white solid over two-steps. The crude material was purified via preparative RP HPLC using a gradient of 0% B to 60% B over 30 min: mp 207-210 °C; <sup>1</sup>H NMR (500 MHz, D<sub>2</sub>O) (rotamers 20:80) δ 7.16 (d, *J* = 8.5 Hz, 1.6 H), 7.12 (d, *J* = 8.5 Hz, 0.4 H) 7.03 (comp, 2 H), 4.62 (comp, 1 H), 4.50-4.39 (comp, 2 H), 4.21 (app t, *J* = 7.3 Hz, 0.8 H), 4.14 (d, *J* = 6.2 Hz, 0.2 H), 4.02 (d, *J* = 6.8 Hz, 0.2 H), 3.86 (d, *J* = 6.2 Hz, 0.8 H) 3.72-3.66 (m, 0.8 H), 3.63-3.57 (m, 0.8 H), 3.52-3.46 (m, 0.2 H), 3.43-3.37 (m, 0.2 H), 3.31-3.24 (m, 0.8 H), 3.18 (dd, *J* = 14.5, 5.1 Hz, 0.8 H), 3.14-3.09 (comp, 0.4 H), 3.04-2.98 (m, 0.2 H), 2.96-2.84 (comp, 2.6 H), 2.79 (dd, *J* = 14.4, 10.4 Hz, 0.8 H), 2.73 (dd, *J* = 15.7, 5.2 Hz, 0.2 H), 2.67 (dd, *J* = 15.7, 8.7 Hz, 0.2 H), 2.20-1.90 (comp, 6 H), 1.87-1.70 (comp, 2 H), 1.50-1.34 (comp, 4 H), 1.24-1.08 (comp, 4 H), 0.91-0.76 (comp, 12 H); <sup>13</sup>C NMR (125 MHz) δ 177.3, 175.2, 174.0, 173.22, 173.19, 171.7, 171.0, 150.9, 132.2, 130.1, 120.4, 61.2, 60.8, 60.7, 60.4, 58.8, 53.8, 51.4, 48.2, 40.0, 39.7, 38.9, 36.8, 36.0, 35.3, 35.0, 30.8, 30.5, 29.2, 29.1, 28.2, 28.1, 27.9, 27.6, 26.3, 25.4, 25.2, 24.9, 24.7, 18.5, 18.42, 18.39, 18.1, 17.9, 17.5, 17.11, 16.99; mass spectrum (ESI) *m/z* 778.3546 [C<sub>35</sub>H<sub>53</sub>N<sub>7</sub>O<sub>1</sub>P (M-H) requires 778.3552].

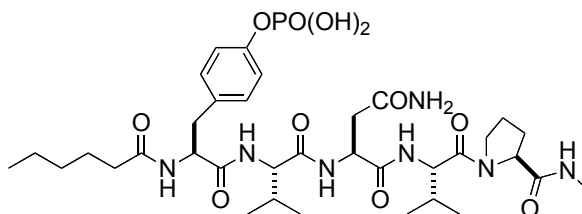

8

**Pentylcarbonyl-*O*-phosphotyrosyl-valyl-asparagyl-valyl-prolyl-NHMe (8).** Prepared from **50** according to the general procedure to yield 10 mg (47%) of the title compound as a white solid

over two-steps. The crude material was purified via preparative RP HPLC using a gradient of 10% B to 70% B over 30 min: mp 215-216 °C (dec);  $^1\text{H}$  NMR (500 MHz,  $\text{D}_2\text{O}$ )  $\delta$  7.07 (dd,  $J = 8.5$  Hz, 2 H), 6.99 (d,  $J = 8.5$  Hz, 2 H), 4.56 (app t,  $J = 7.3$  Hz, 1 H), 4.52-4.45 (m, 1 H), 4.29 (d,  $J = 7.8$  Hz, 1 H), 4.18 (app t,  $J = 7.6$  Hz, 1 H), 3.96 (d,  $J = 7.8$  Hz, 1 H), 3.74-3.65 (m, 1 H), 3.60-3.52 (m, 1 H), 3.00-2.92 (m, 1 H), 2.84-2.77 (m, 1 H), 2.67-2.53 (comp, 5 H), 2.16-1.70 (comp, 8 H), 1.38-1.29 (comp, 2 H), 1.14-1.05 (comp, 2 H), 1.02-9.95 (comp, 2 H), 0.86-0.66 (comp, 15 H);  $^{13}\text{C}$  NMR (500 MHz,  $\text{D}_2\text{O}$ )  $\delta$  177.4, 174.8, 174.4, 173.4, 172.7, 172.0, 171.9, 151.0, 132.2, 130.7, 120.6, 61.1, 59.3, 57.3, 54.9, 50.6, 48.4, 36.4, 36.3, 35.5, 30.6, 30.5, 30.0, 29.6, 26.0, 25.1, 24.7, 21.8, 18.52, 18.50, 17.7, 17.6, 13.3; mass spectrum (ESI)  $m/z$  780.3703 [ $\text{C}_{35}\text{H}_{55}\text{N}_7\text{O}_{11}\text{P}$  (M-H) requires 780.3689].

**Table S1.** X-ray diffraction data and refinement statistics for the Grb2 SH2 domain in complex with **7** and **8**.

| <i>Data Set</i>                                         | Grb2 SH2/ <b>2</b>        | Grb2 SH2/ <b>7</b>       | Grb2 SH2/ <b>8</b>               |
|---------------------------------------------------------|---------------------------|--------------------------|----------------------------------|
| <b>Data Collection</b>                                  |                           |                          |                                  |
| Total reflections <sup>a</sup>                          | 145812 /<br>145072        | 429544 /<br>428917       | 208429 /<br>208411               |
| Unique reflections <sup>a</sup>                         | 25618 /<br>23689          | 73832 /<br>70926         | 9451 /<br>9416                   |
| Resolution range (Å)<br>(outer shell)                   | 50.00–2.02<br>(2.09–2.02) | 50.00–1.7<br>(1.75–1.69) | 50.00–1.9<br>(1.93–1.86)         |
| Completeness, % (outer shell)                           | 99.7 (99.8)               | 91.3 (69.4)              | 99.6 (97.0)                      |
| Data redundancy (outer shell)                           | 5.7 (5.4)                 | 5.8 (4.1)                | 22.1 (19.5)                      |
| R <sub>sym</sub> <sup>b</sup> (outer shell)             | 0.098 (0.355)             | 0.066 (0.275)            | 0.066 (0.152)                    |
| I/σ(I)                                                  | 9.9 (2.4)                 | 24.5 (3.7)               | 60.6 (21.1)                      |
| <b>Refinement</b>                                       |                           |                          |                                  |
| No. reflections <sup>c</sup>                            | 23058 / 2529              | 43604 / 2376             | 7251 / 385                       |
| R <sub>cryst</sub> <sup>d</sup> / R <sub>free</sub> , % | 18.0 / 22.2               | 18.0 / 22.3              | 18.7 / 22.4                      |
| RMS dev. from ideal values                              |                           |                          |                                  |
| Bond lengths (Å)                                        | 0.0057                    | 0.0173                   | 0.0158                           |
| Bond angles (deg)                                       | 1.24                      | 1.74                     | 1.65                             |
| B-factor restraints (Å <sup>2</sup> )                   |                           |                          |                                  |
| Backbone bonds (RMS / σ)                                | 1.34 / 1.5                | 1.18 / 1.5               | 1.26 / 1.5                       |
| Side-chain bonds (RMS / σ)                              | 1.99 / 2.0                | 1.97 / 2.0               | 1.99 / 2.0                       |
| Backbone angles (RMS / σ)                               | 2.10 / 2.0                | 1.80 / 2.0               | 1.93 / 2.0                       |
| Side-chain angles (RMS / σ)                             | 2.83 / 2.5                | 2.69 / 2.5               | 2.97 / 2.5                       |
| <b>Crystal</b>                                          |                           |                          |                                  |
| Space group                                             | P3 <sub>2</sub> 21        | C <sub>2</sub>           | P4 <sub>1</sub> 2 <sub>1</sub> 2 |
| Cell dimensions                                         |                           |                          |                                  |
| a, b, c (Å)                                             | 83.16, 83.16,<br>96.01    | 83.22, 141.32,<br>62.45  | 49.24, 49.24,<br>86.13           |
| α, β, γ (deg.)                                          | 90.0, 90.0,<br>120.0      | 90.0, 90.0,<br>90.0      | 90.0, 90.0,<br>90.0              |
| No. complexes in asym. unit                             | 3                         | 6                        | 1                                |
| Solvent content, %                                      | 46.8                      | 47.7                     | 38.7                             |
| Matthews Coef; V <sub>m</sub> (Å <sup>3</sup> /Da)      | 2.31                      | 2.35                     | 2.01                             |
| Bulk solvent b-factor (Å <sup>2</sup> )                 | 68.4                      | 23.9                     | 24.6                             |
| <b>Final Model</b>                                      |                           |                          |                                  |
| No. protein residues                                    | 294                       | 628                      | 99                               |
| No. protein atoms                                       | 2430                      | 5185                     | 819                              |
| No. ligand atoms                                        | 141                       | 324                      | 54                               |
| No. water molecules                                     | 372                       | 728                      | 107                              |
| No. solvent molecules                                   | 0                         | 10                       | 1                                |
| No. res. in alt. conformations                          | 0                         | 0                        | 0                                |

<sup>a</sup> no. reflections / no. for which I/σ(I) ≥ 1.0

<sup>b</sup> R<sub>sym</sub> = ∑ |I<sub>i</sub> - <I>| / ∑ I<sub>i</sub>, where I<sub>i</sub> is the scaled intensity of the *i*th observation and <I> is the mean intensity for that reflection.

<sup>c</sup> no. reflections used in refinement; working set / free R set

<sup>d</sup> R<sub>cryst</sub> = ∑ ||F<sub>calc</sub> - F<sub>obs</sub>|| / ∑ |F<sub>obs</sub>|, where F<sub>calc</sub> and F<sub>obs</sub> are the calculated and observed structure factor amplitudes, respectively.

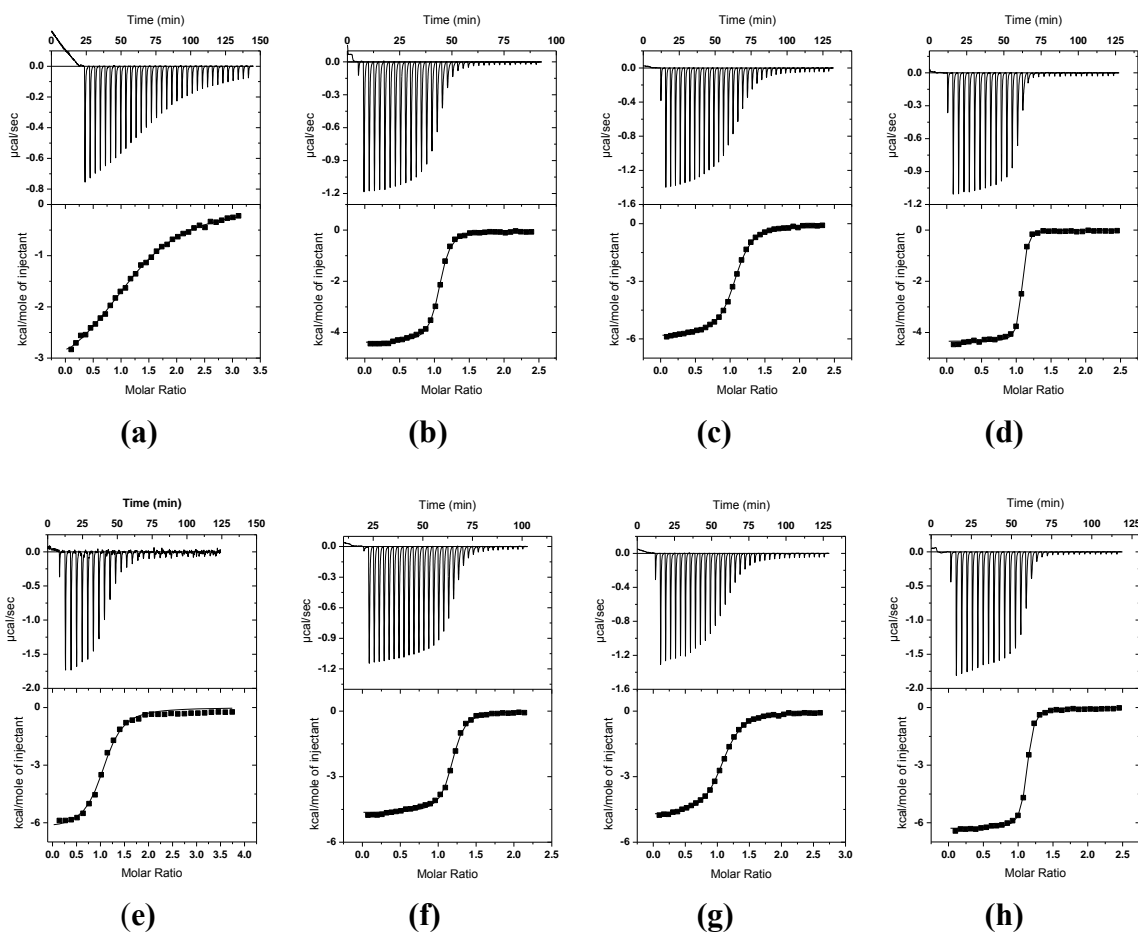

**Figure S1.** Typical ITC traces obtained for the interactions between phosphotyrosine-derived ligands and monomeric Grb2 SH2 domain in HEPES buffer (50 mM) (pH = 7.45±0.05) and NaCl (150 mM). **Top of Graph:** Titration data obtained from 30–35 x 7–9 µL injections of ligand, giving the exothermic heats of complexation (µcal/s). The baseline at 0.0 µcal/s was obtained from the raw data by subtracting pre- and post-injection data. **Bottom of Graph:** Integrated ITC data, giving heats of complexation per mol of ligand injected. Data were corrected for heats of dilution by subtracting a blank titration, acquired by injecting an equal amount of ligand into buffer. The solid line was obtained by applying a nonlinear least squares fit to solve for the thermodynamic parameters  $n$ , (number of binding sites),  $K_a$  and  $\Delta H^\circ$ . (a) Data for ligand 1. (b) Data for ligand 2. (c) Data for ligand 3. (d) Data for ligand 7. (e) Data for ligand 4. (f) Data for ligand 5. (g) Data for ligand 6. (h) Data for ligand 8.

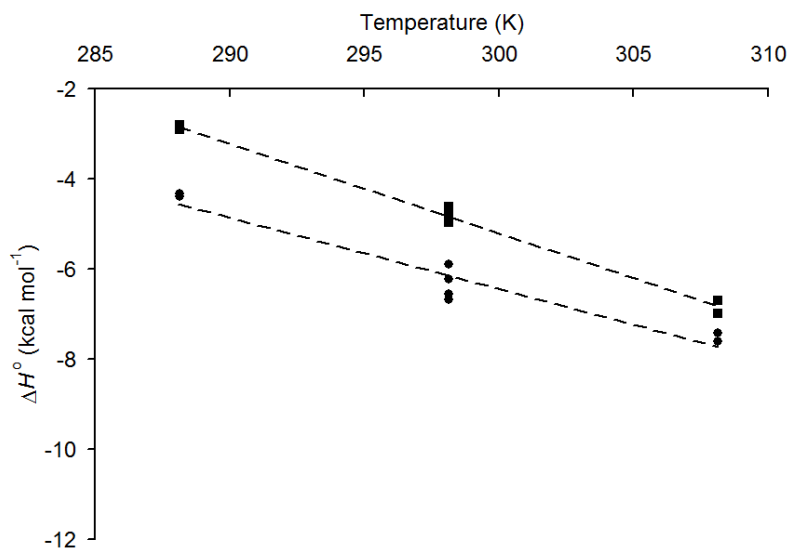

(a)

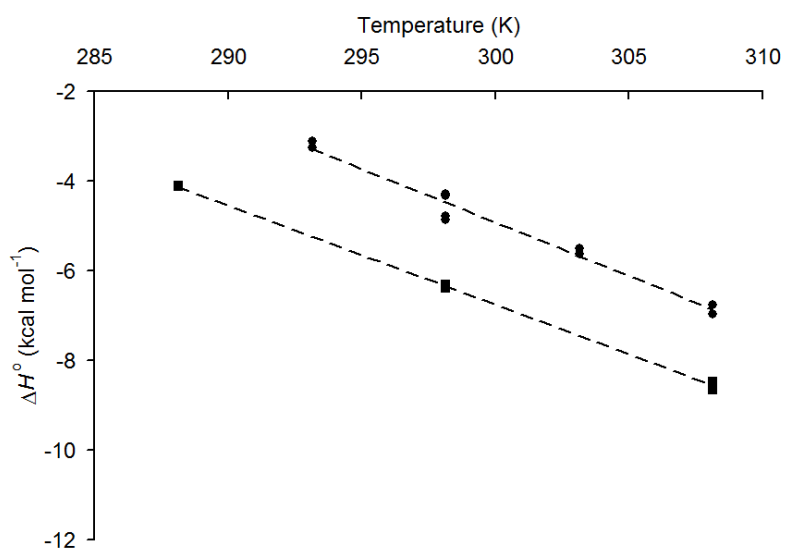

(b)

**Figure S2.**  $\Delta H^0$  of binding as a function of temperature for macrocyclic (circles) and acyclic (squares) ligand pairs **3/6** (a) and **7/8** (b) in which the slope of the lines is the change in heat capacity,  $\Delta C_p$ , on binding.

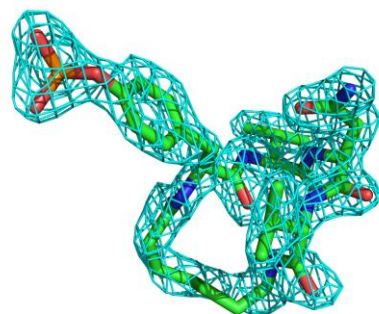

(a)

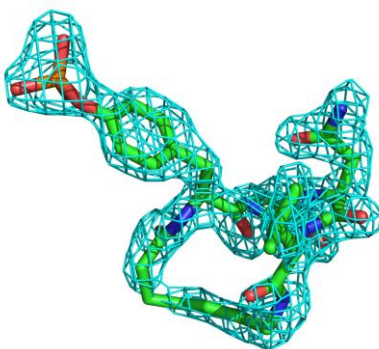

(b)

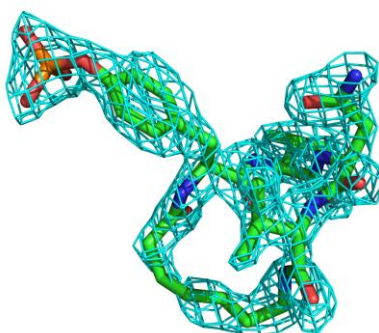

(c)

**Figure S3.** Electron density difference omit maps showing the structure of **2** bound to the Grb2 SH2 domain. The maps, indicated by the cyan wire mesh, are unweighted  $F_o - F_c$  omit maps contoured at  $+3 \sigma$ , showing only the portion within 1.0–1.5 Å of each ligand atom in the complexes for clarity a) Complex **a** of the domain with **2**. b) Complex **b** of the domain with **2**. c) Complex **c** of the domain with **2**.

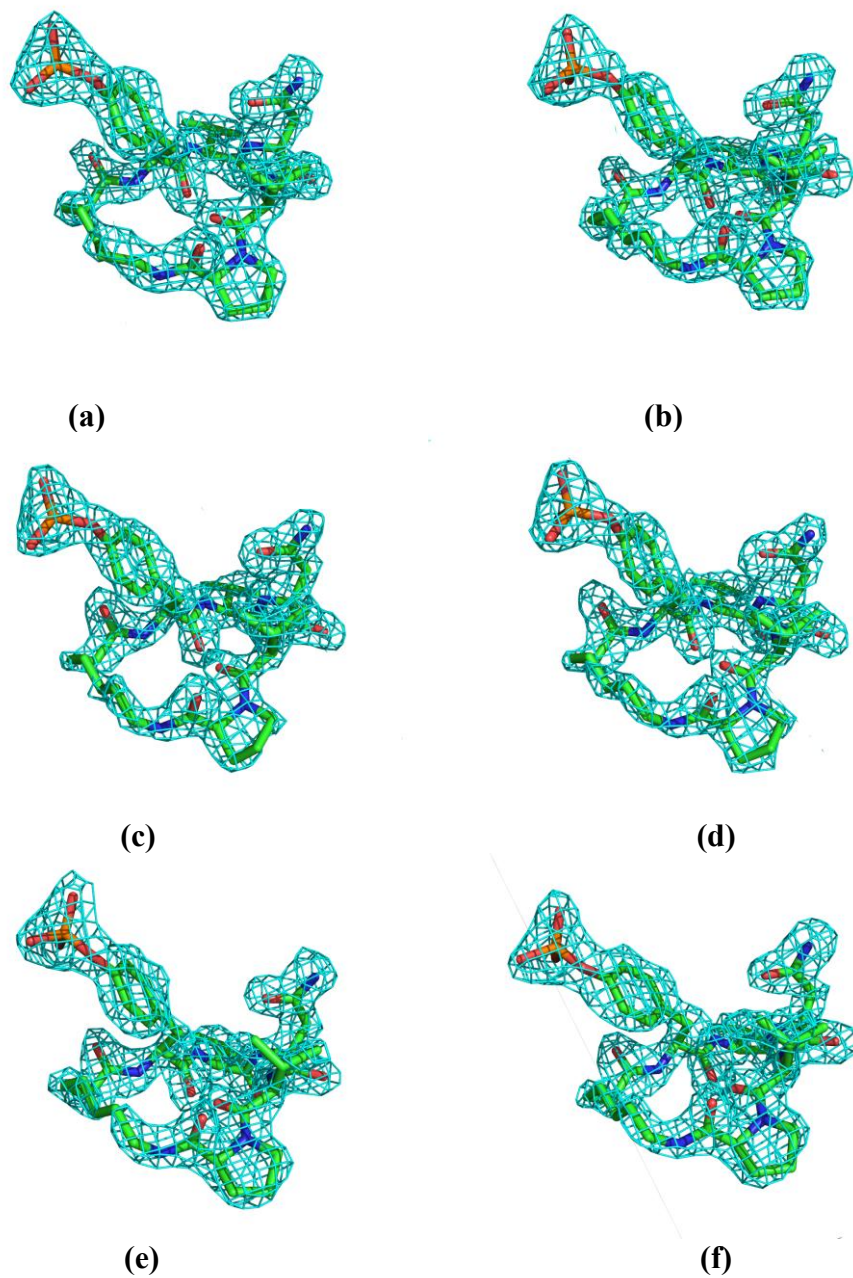

**Figure S4.** Electron density difference omit maps showing the structure of **7** bound to the Grb2 SH2 domain. The maps, indicated by the cyan wire mesh, are unweighted  $F_o-F_c$  omit maps contoured at  $+3\sigma$ , showing only the portion within 1.0–1.5 Å of each ligand atom in the complexes for clarity a) Complex **a** of the domain with **7**. b) Complex **b** of the domain with **7**. c) Complex **c** of the domain with **7**. d) Complex **d** of the domain with **7**. e) Complex **e** of the domain with **7**. f) Complex **f** of the domain with **7**.

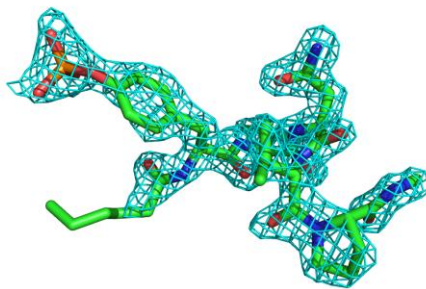

**Figure S5.** Electron density difference omit map showing the structure of **8** bound to the Grb2 SH2 domain. The map, indicated by the cyan wire mesh, is an unweighted  $F_o-F_c$  omit map contoured at  $+3 \sigma$ , showing only the portion within 1.0–1.5 Å of each ligand atom in the complexes for clarity.



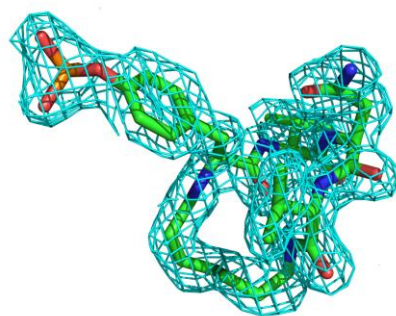

(a)

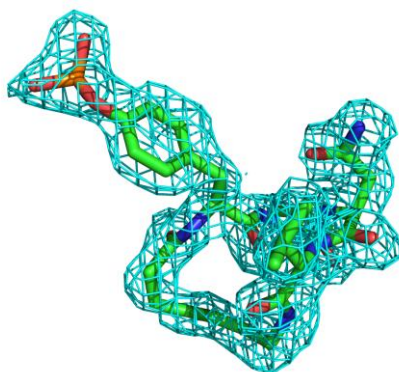

(b)

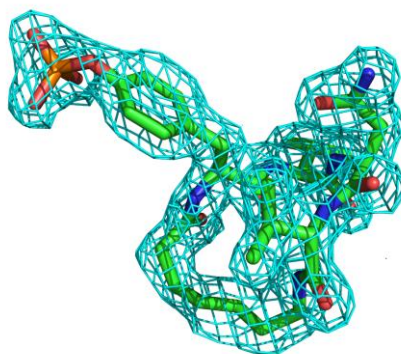

(c)

**Figure S6.** Electron density difference maps showing the structure of **2** bound to the Grb2 SH2 domain. The maps, indicated by the cyan wire mesh, are unweighted  $2F_o - F_c$  maps contoured at  $+1 \sigma$ , showing only the portion within 1.0–1.5 Å of each ligand atom in the complexes for clarity a) Complex **a** of the domain with **2**. b) Complex **b** of the domain with **2**. c) Complex **c** of the domain with **2**.

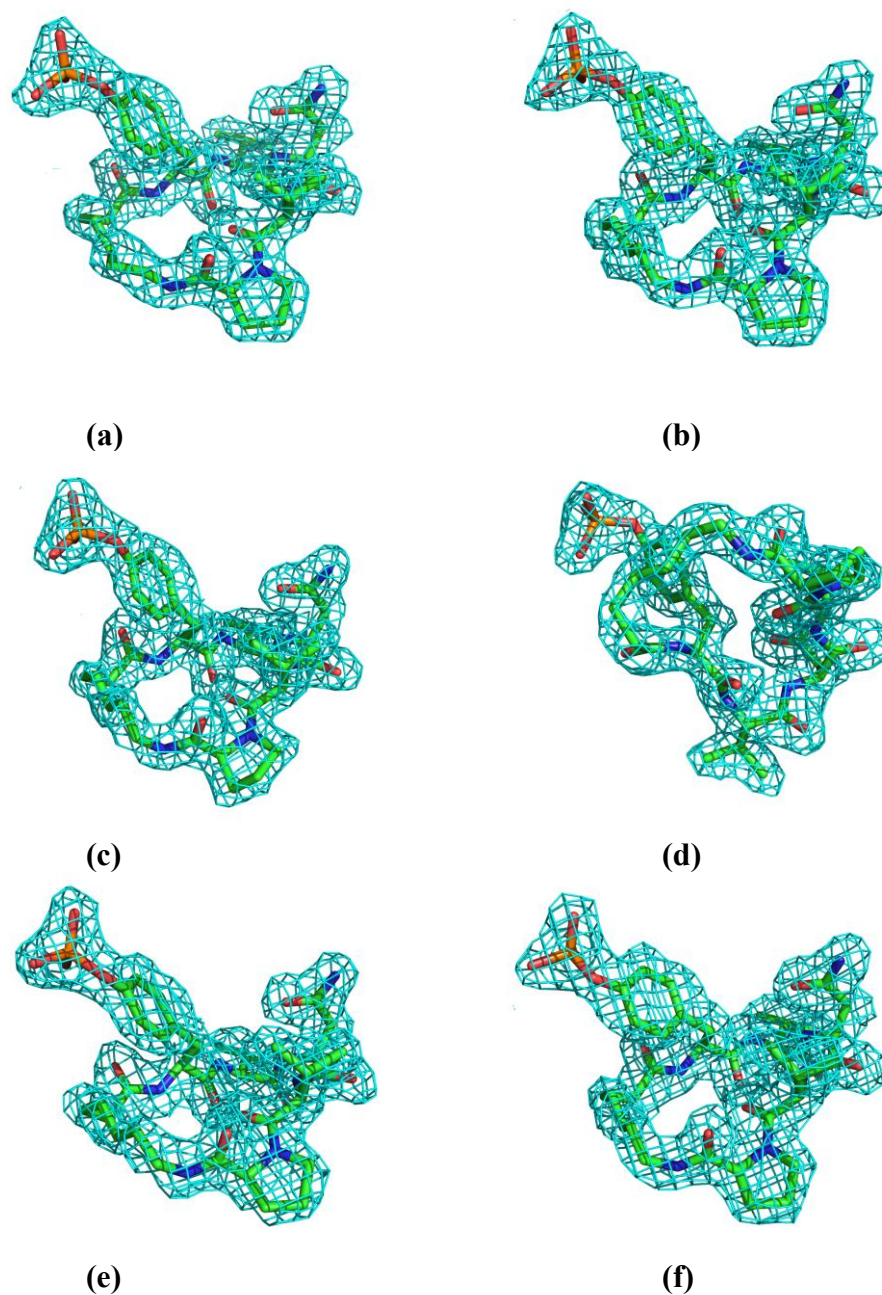

**Figure S7.** Electron density difference maps showing the structure of **7** bound to the Grb2 SH2 domain. The maps, indicated by the cyan wire mesh, are unweighted  $2F_o-F_c$  maps contoured at  $+1\sigma$ , showing only the portion within 1.0–1.5 Å of each ligand atom in the complexes for clarity. a) Complex **a** of the domain with **7**. b) Complex **b** of the domain with **7**. c) Complex **c** of the domain with **7**. d) Complex **d** of the domain with **7**. e) Complex **e** of the domain with **7**. f) Complex **f** of the domain with **7**.

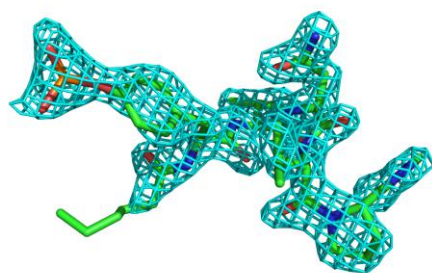

**Figure S8.** Electron density difference map showing the structure of **8** bound to the Grb2 SH2 domain. The map, indicated by the cyan wire mesh, is an unweighted  $2F_o-F_c$  maps contoured at  $+1 \sigma$ , showing only the portion within 1.0–1.5 Å of each ligand atom in the complexes for clarity.

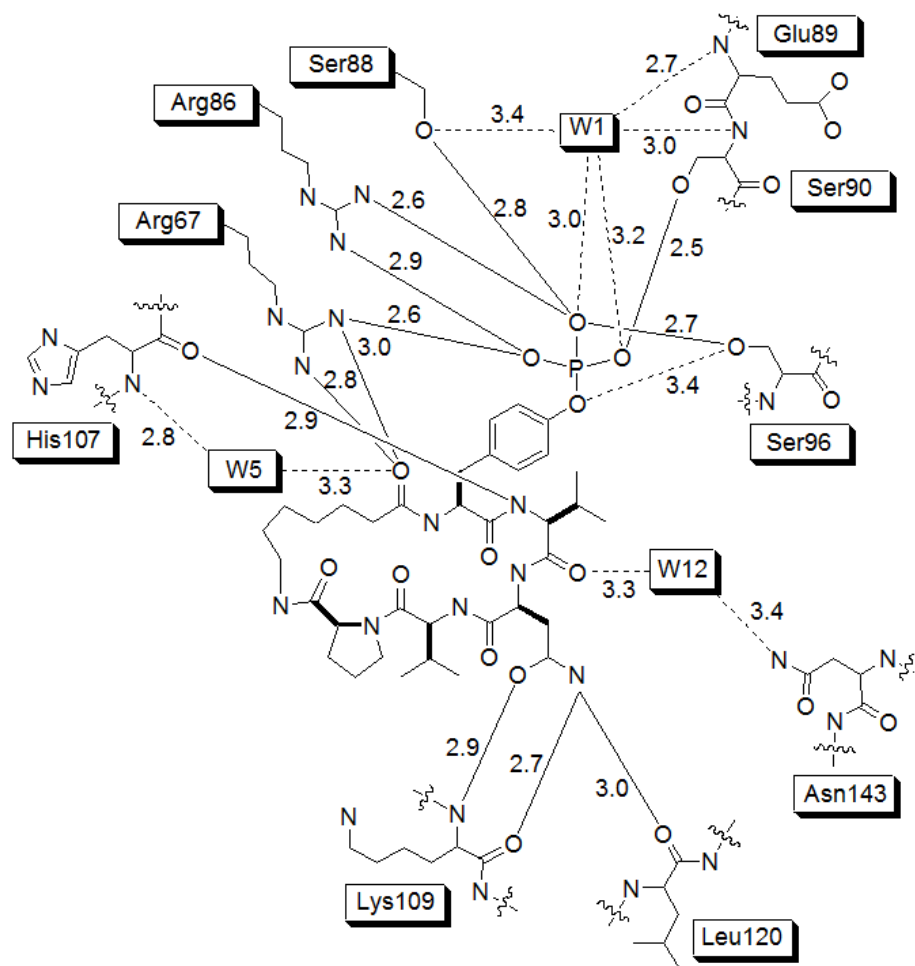

**Figure S9.** Contact diagram of the **a** complex of **7** bound to the Grb2 SH2 domain showing all direct and single water-mediated polar protein-ligand contacts.

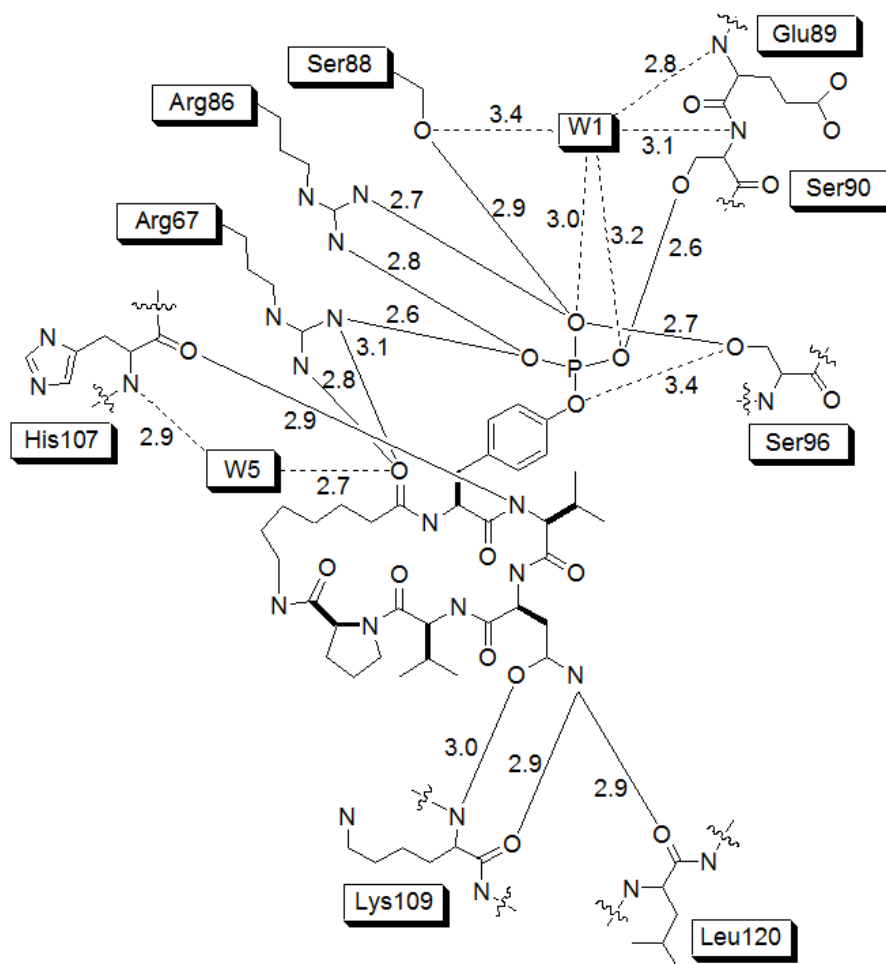

**Figure S10.** Contact diagram of the **b** complex of **7** bound to the Grb2 SH2 domain showing all direct and single water-mediated polar protein-ligand contacts.

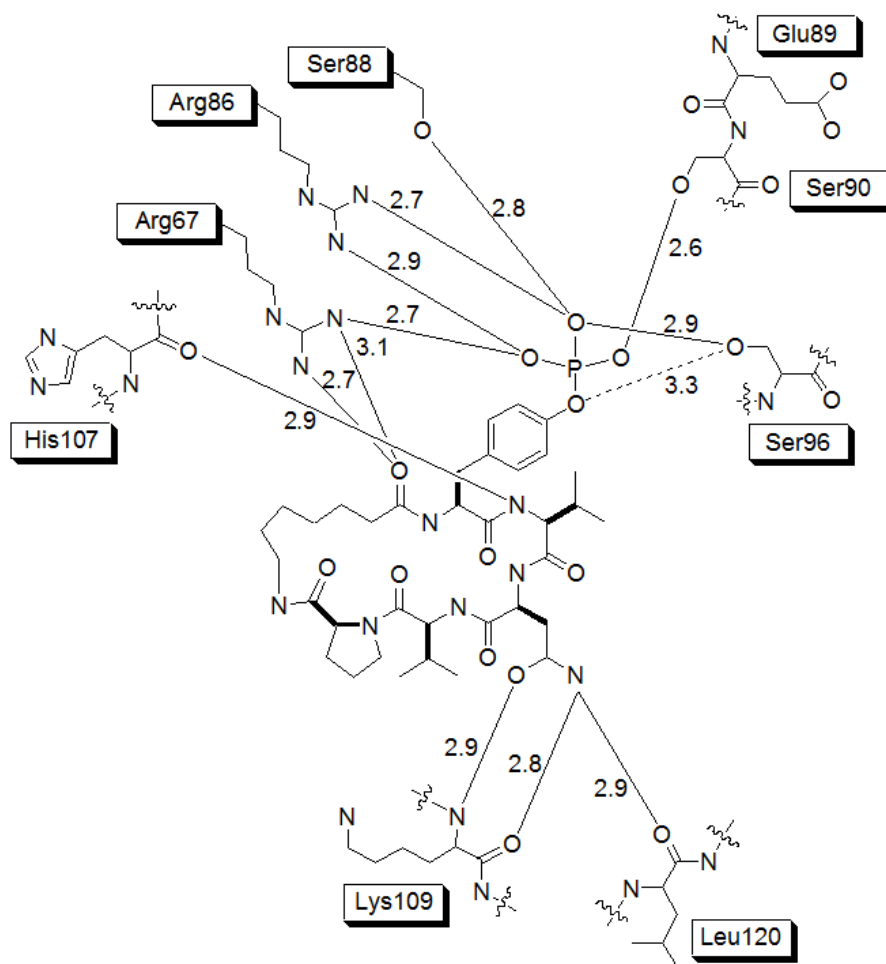

**Figure S11.** Contact diagram of the **c** complex of **7** bound to the Grb2 SH2 domain showing all direct and single water-mediated polar protein-ligand contacts.

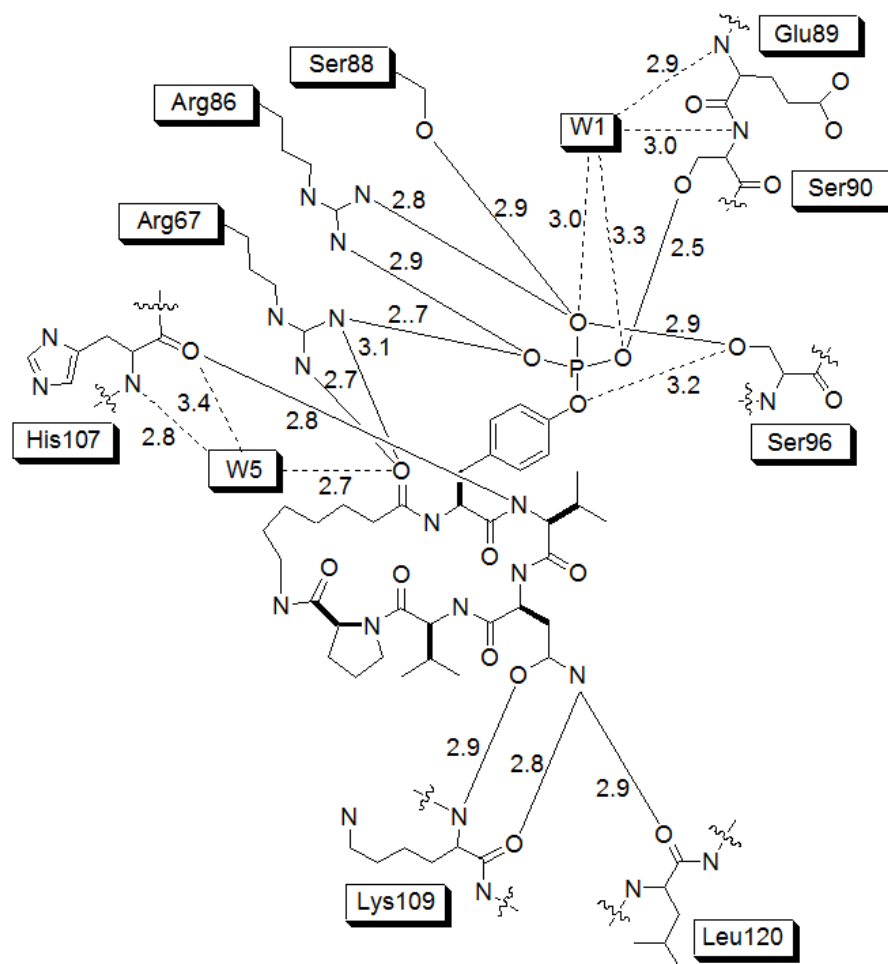

**Figure S12.** Contact diagram of the **d** complex of **7** bound to the Grb2 SH2 domain showing all direct and single water-mediated polar protein-ligand contacts.

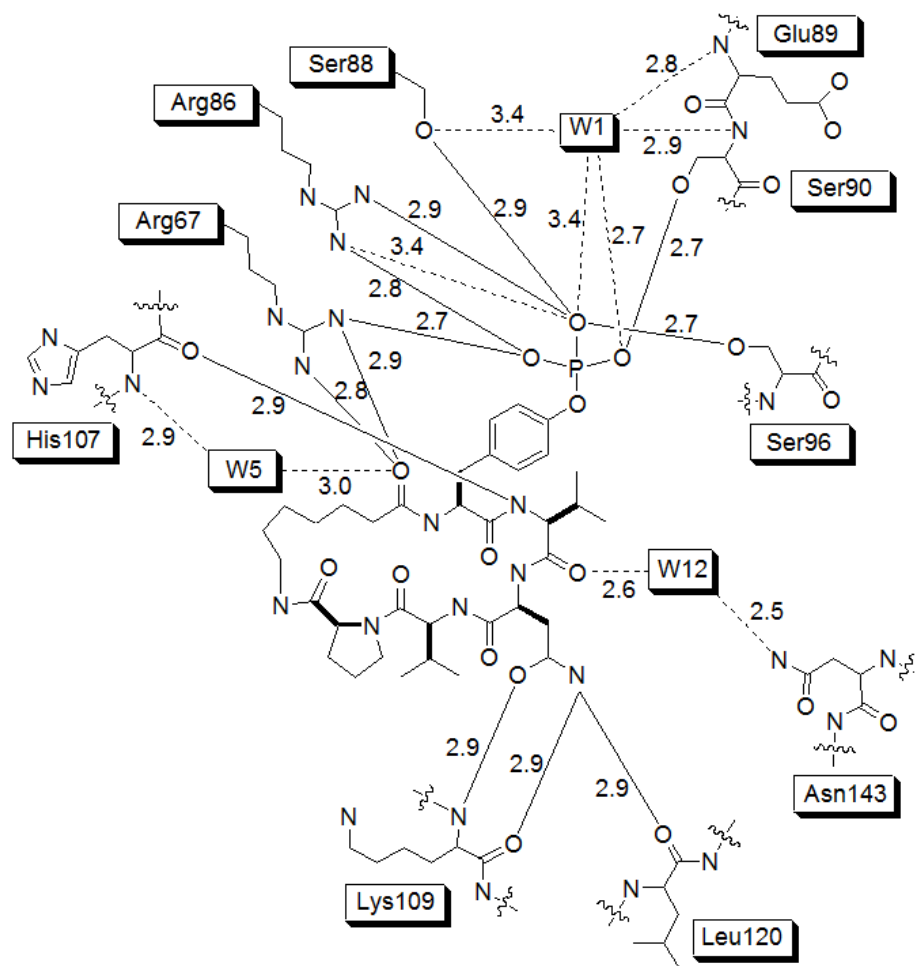

**Figure S13.** Contact diagram of the e complex of 7 bound to the Grb2 SH2 domain showing all direct and single water-mediated polar protein-ligand contacts.



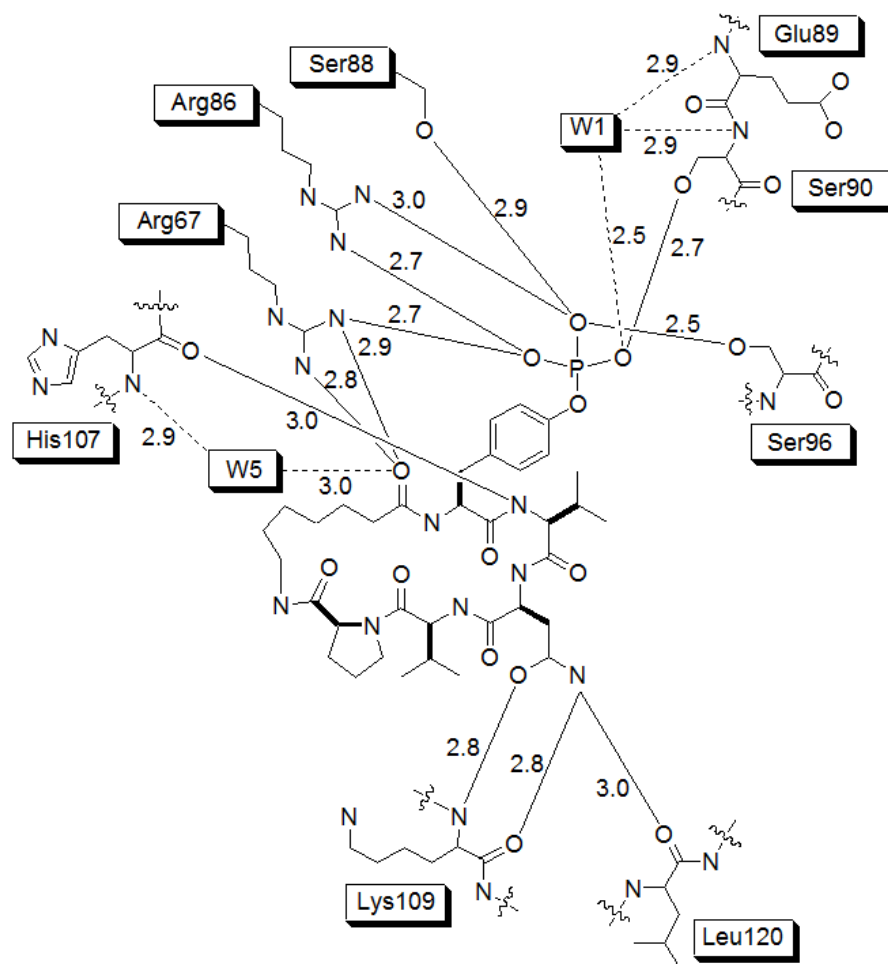

**Figure S14.** Contact diagram of the **f** complex of **7** bound to the Grb2 SH2 domain showing all direct and single water-mediated polar protein-ligand contacts.

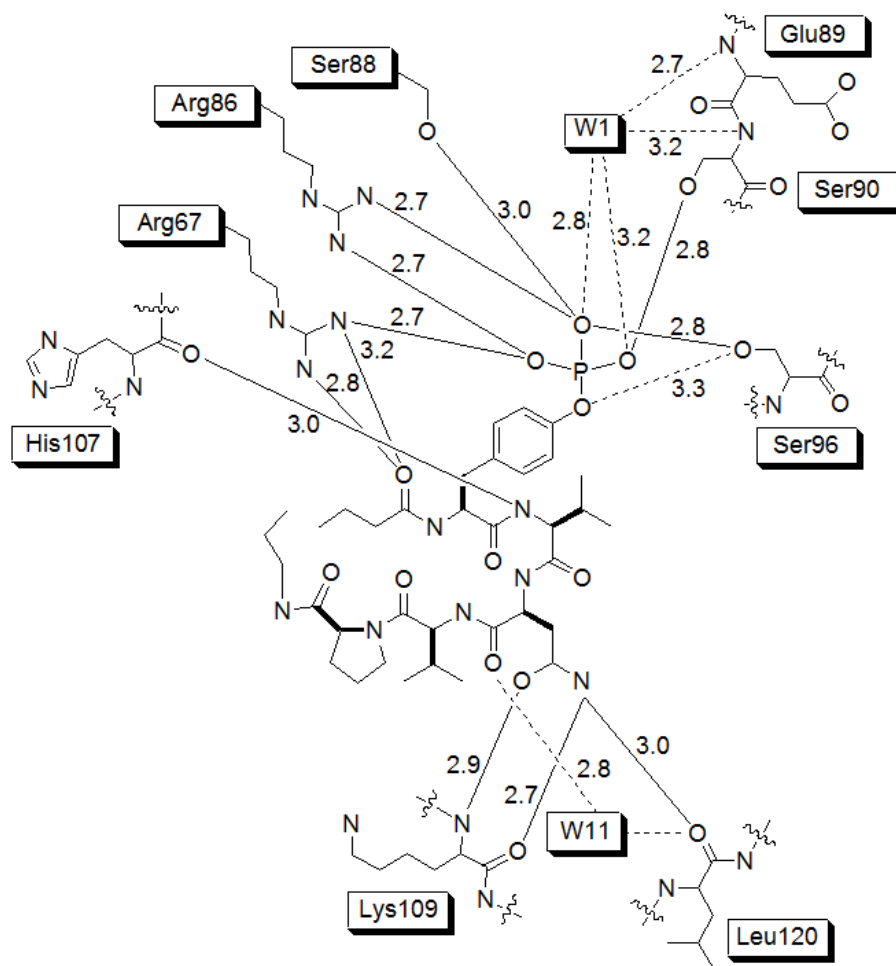

**Figure S15.** Contact diagram of the complex of **8** bound to the Grb2 SH2 domain showing all direct and single water-mediated polar protein-ligand contacts.

**Table S2.** Direct and single water-mediated contacts in the complexes of **7** and **8**.<sup>[a]</sup>

| Ligand    | CO-pY Contacts |                    | Other Contacts |                    | Total      |                    |                |
|-----------|----------------|--------------------|----------------|--------------------|------------|--------------------|----------------|
|           | Direc<br>t     | Water-<br>mediated | Direc<br>t     | Water-<br>mediated | Direc<br>t | Water-<br>mediated | Grand<br>Total |
| <b>7a</b> | 9              | 3                  | 4              | 1                  | 13         | 4                  | 17             |
| <b>7b</b> | 9              | 3                  | 4              | 0                  | 13         | 3                  | 16             |
| <b>7c</b> | 9              | 0                  | 4              | 0                  | 13         | 0                  | 13             |
| <b>7d</b> | 9              | 3                  | 4              | 0                  | 13         | 3                  | 16             |
| <b>7e</b> | 9              | 3                  | 4              | 1                  | 13         | 4                  | 17             |
| <b>7f</b> | 9              | 2                  | 4              | 0                  | 13         | 2                  | 15             |
| <b>8</b>  | 9              | 2                  | 4              | 1                  | 13         | 3                  | 16             |

[a] Only contacts between polar non-hydrogen atoms with atom-atom distances in the range 2.5–3.4 Å were counted with the exception of the **f** complex of **7** for which one direct between the domain and the CO-pY region of the ligand with a distance of 3.5 Å was included. Contacts mediated by a single, ordered water molecule conforming to the same distance criterion were also counted. Contacts between multiple non-hydrogen atoms of the domain to the same non-hydrogen atom of the ligand mediated by the same ordered water molecule were counted only once. Contacts between the same non-hydrogen atom of the domain to  $x$  non-hydrogen atoms of the ligand mediated by the same ordered water molecule were counted  $x$  times. No attempt was made to characterize the contacts based on the orientation of donor/acceptor dipole moments. Entries for the **a** and **b**, **c** and **d**, and **e** and **f** complexes of **7**, for which the domain adopts different conformations, are delineated by the grey highlighting.

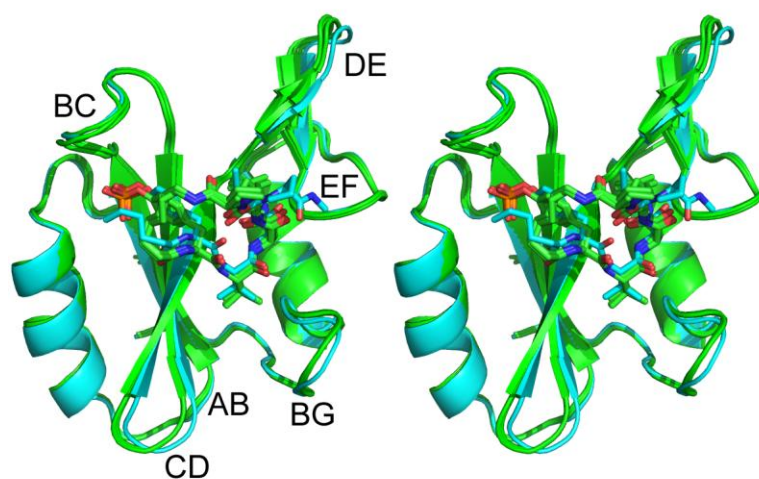

(a)

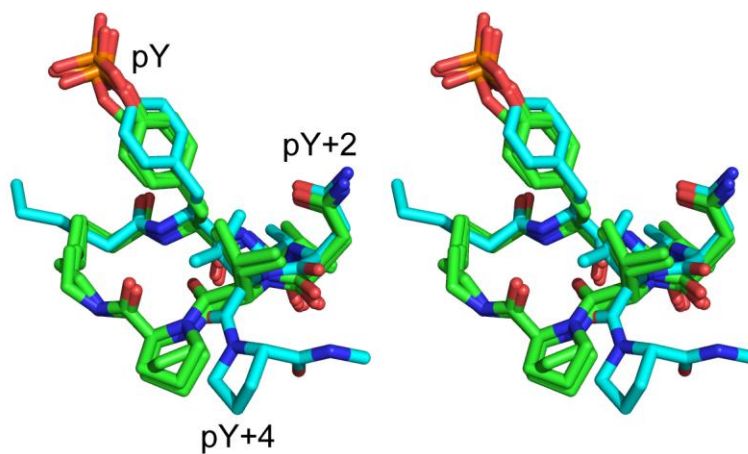

(b)

**Figure S16.** Stereo images of **7** and **8** bound to the Grb2 SH2 domain following domain alignment. Oxygen, nitrogen, and phosphorous atoms are colored red, blue, and orange, respectively. Carbon atoms belonging to the complexes of **7** are colored green while those belonging to the complex of **8** are colored cyan. Only the **a**, **c**, and **e** complexes of **7**, which are representative of the three conformations of the domain in the six complexes, are shown for clarity. a) Image showing the complete domain (ribbons) and the bound ligands (sticks). b) Image showing only the ligands (sticks).

## References

- 1) DeLorbe, J. E.; Clements, J. H.; Teresk, M. G.; Benfield, A. P.; Plake, H. R.; Millspaugh, L. E.; Martin, S. F. "Thermodynamic and Structural Effects of Conformational Constraints in Protein–Ligand Interactions. Entropic Paradoxy Associated with Ligand Preorganization" *J. Am. Chem. Soc.* **2009**, *131*, 16758-16770.
- 2) Miroshnikov, A. I.; Kiryushkin, A. A.; Ovchinnikov, Y. A. "Mass-Spectrometric Determination of the Amino Acid Sequence in Peptides. XII. Synthesis of Derivatives of Peptides Containing Asparagine and Glutamine Residues" *Zhurnal Obshchei Khimii* **1970**, *40*, 223-235.
- 3) Teresk, M. G. Design, Synthesis, and Thermodynamic Evaluation of Conformationally-Constrained Pseudopeptides and Synthetic Approaches to Sieboldine A. Dissertation, University of Texas at Austin, 2008.
- 4) Millspaugh, L. E. Synthesis and Evaluation of Macrocyclic and Conformationally Constrained Peptide Replacements for the Grb2-SH2 Domain. Dissertation, University of Texas at Austin, 2005.
- 5) Muir, J. C.; Pattenden, G.; Thomas, R. M. "Total Synthesis of (–)-muscoride A. A Novel Bis-oxazole Based Alkaloid from the Cyanobacterium *Nostoc muscorum*" *Synthesis* **1998**, 613-618.

JEDI-193  
jed193

exp1 presat

SAMPLE

date Sep 1 2005

solvent cd30d

file ACQUISITION

sfreq 499.870

in H1

at 3.996

np 73980

sw 9256.0

fb 5000

bs 32

ss 2

tpwr 57

pw 2.0

di 0

tof 1124.6

nt 64

ct 64

atlock n

gain 30

math f

flags n

in n

dp y

hs n

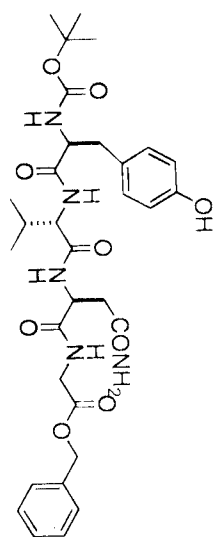

dn H1  
dof -76.6  
dm nnn  
c c  
dmf 200  
dpm 30  
temp 27.0  
PROCESSING 0.10  
lb 1b  
wtfile wtfile  
proc n  
fn n  
math not used  
f f

weff n  
wexp n  
wds y  
wnt n

DISPLAY  
sp -250.1  
wp 5248.5  
vs 583  
sc 0  
wc 250  
hzm 20.99  
is 3308.44  
rf1 2687.7  
th 1649.5  
ins 5  
ai 1.000  
ph

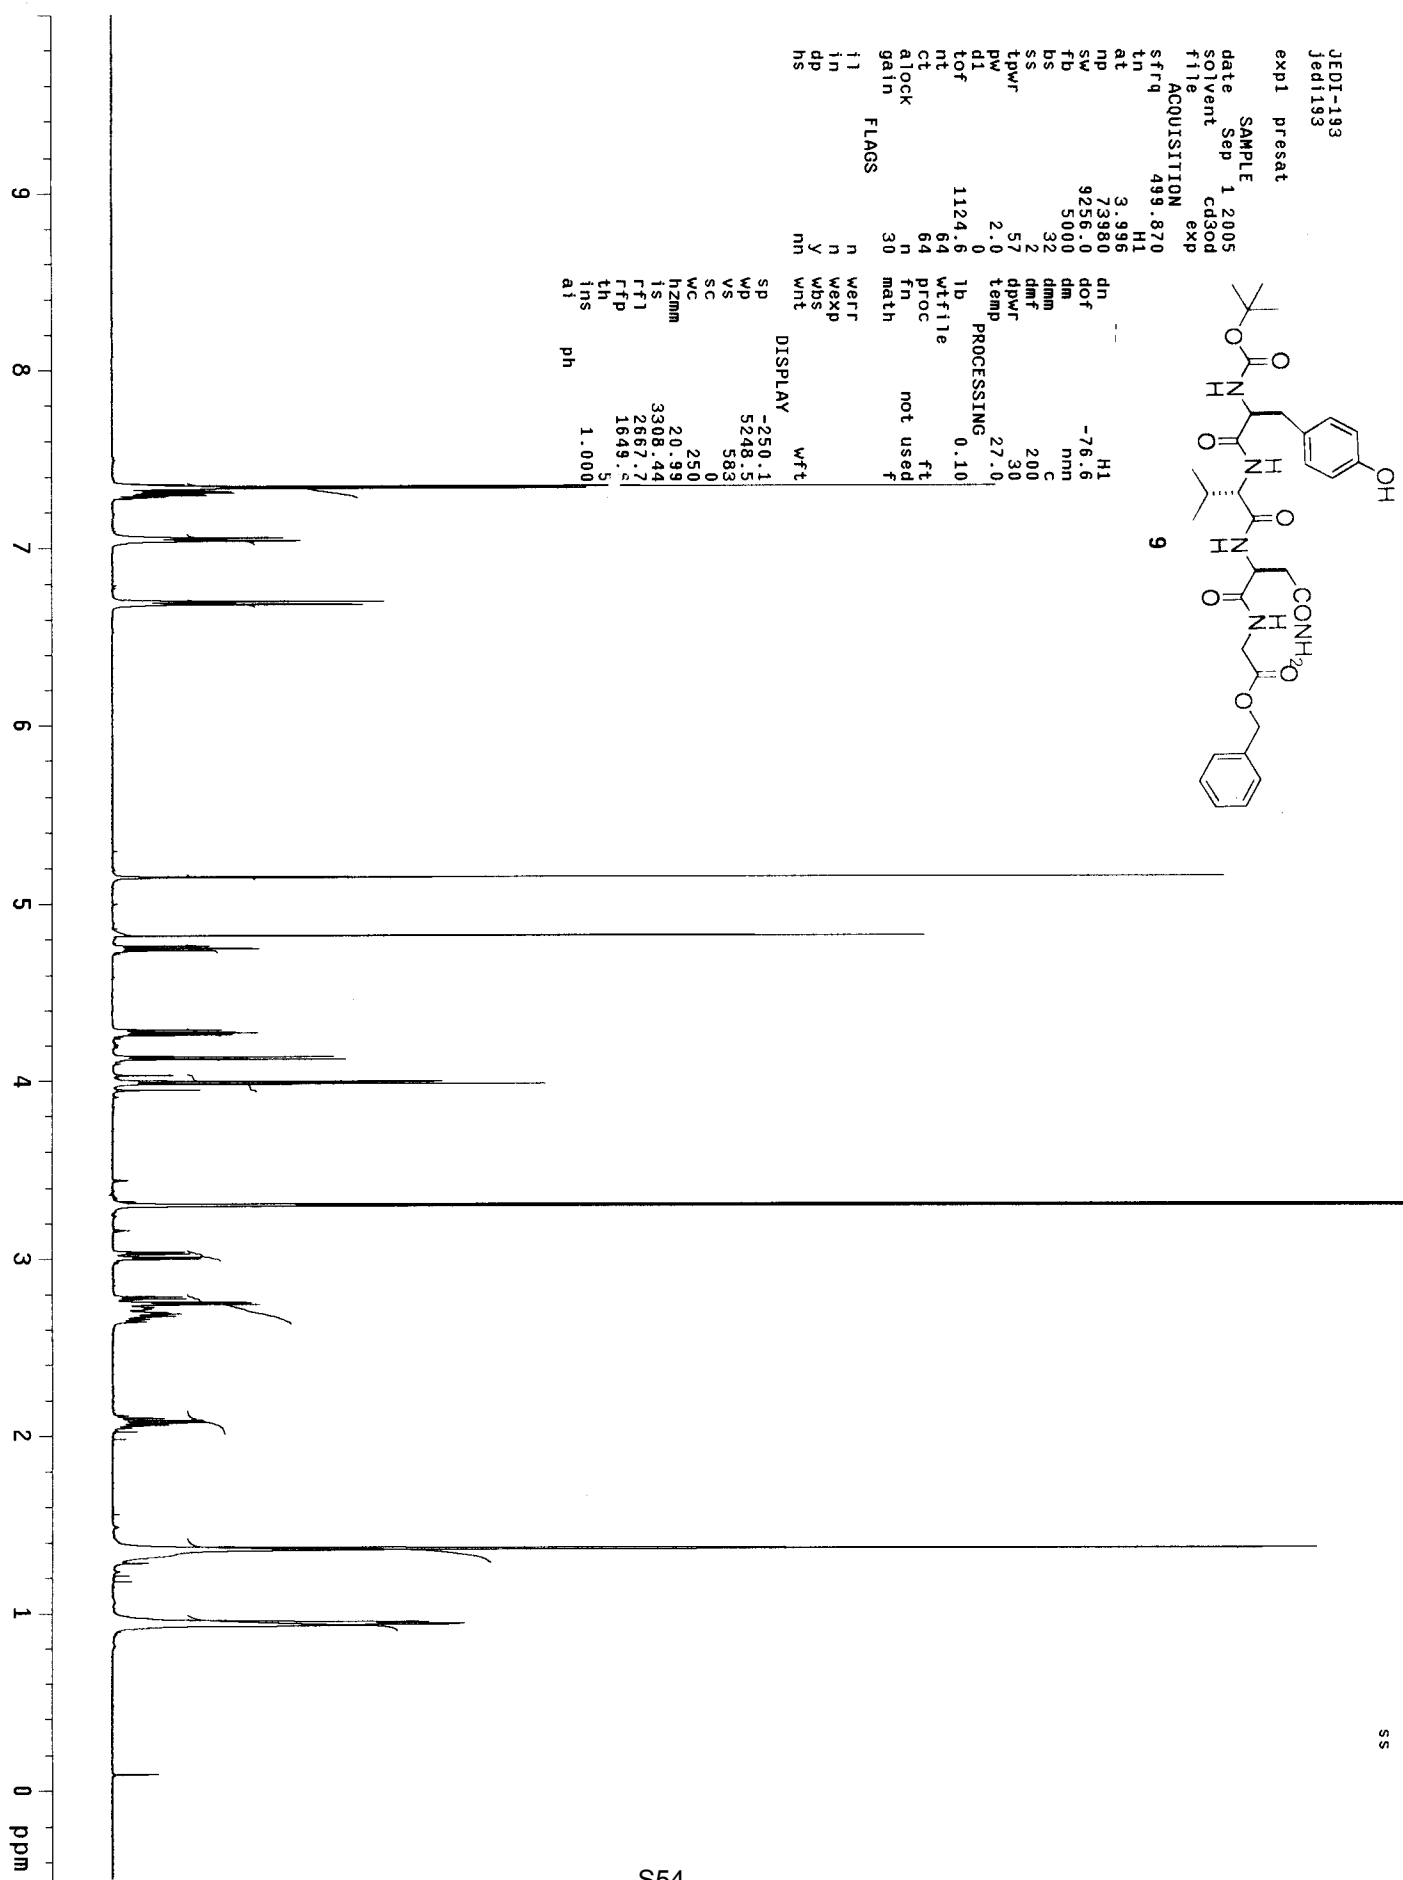

JEDI-193  
jed1193

exp4 s2pu1

SAMPLE DEC. & VT  
date Sep 1 2005 dfrq 499.869  
solvent cd3od dn H1  
file exp dpr 37  
ACQUISITION dof 0  
sfrq 125.706 dm YVY  
in C13 dmm W  
at 1.279 dmf 10582  
np 85262 dseg  
sw 3333.3 dres 1.0  
fb not used homo 1.0  
bs temp 27.0  
tpwr 53  
pw 3.0 lb  
dl 2.000 wfile 1.00  
tof 2198.1 proc ft  
nt 10000 fn not used  
ct 10000 math f  
atock n  
gain 60 weff  
FLAGS wexp  
fl n wds  
in n Wnt  
dp y  
hs nm

DISPLAY  
sp -628.7  
wp 25766.5  
vs 4720  
sc 0  
wc 250  
hzmm 103.07  
ls 500.00  
rfl 8539.3  
rflp 6158.9  
th 1  
ins 100.000  
ai cdc ph

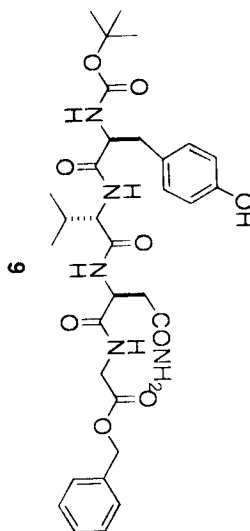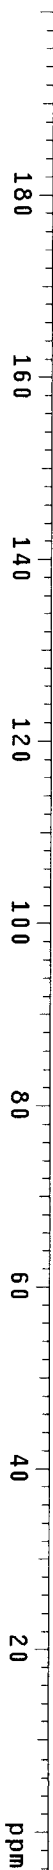

JEDII(48)-1/11/06

Pulse Sequence: s2pu1  
Solvent: CD3OD  
Ambient temperature  
Mercury-400BB "nmr6"

Relax. delay 2.000 sec  
Pulse: 16.4 degrees  
Acq. time 2.936 sec  
Width 5602.2 Hz  
36 repetitions  
OBSERVE H1, 400.2685554 MHz  
DATA PROCESSING  
Line broadening 0.1 Hz  
FT size 32768  
Total time 3 min, 34 sec

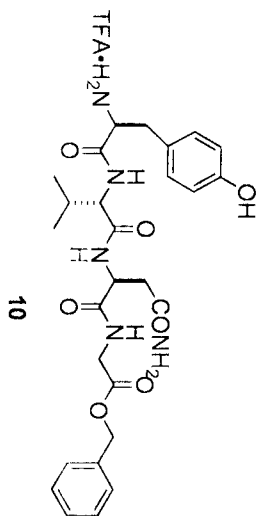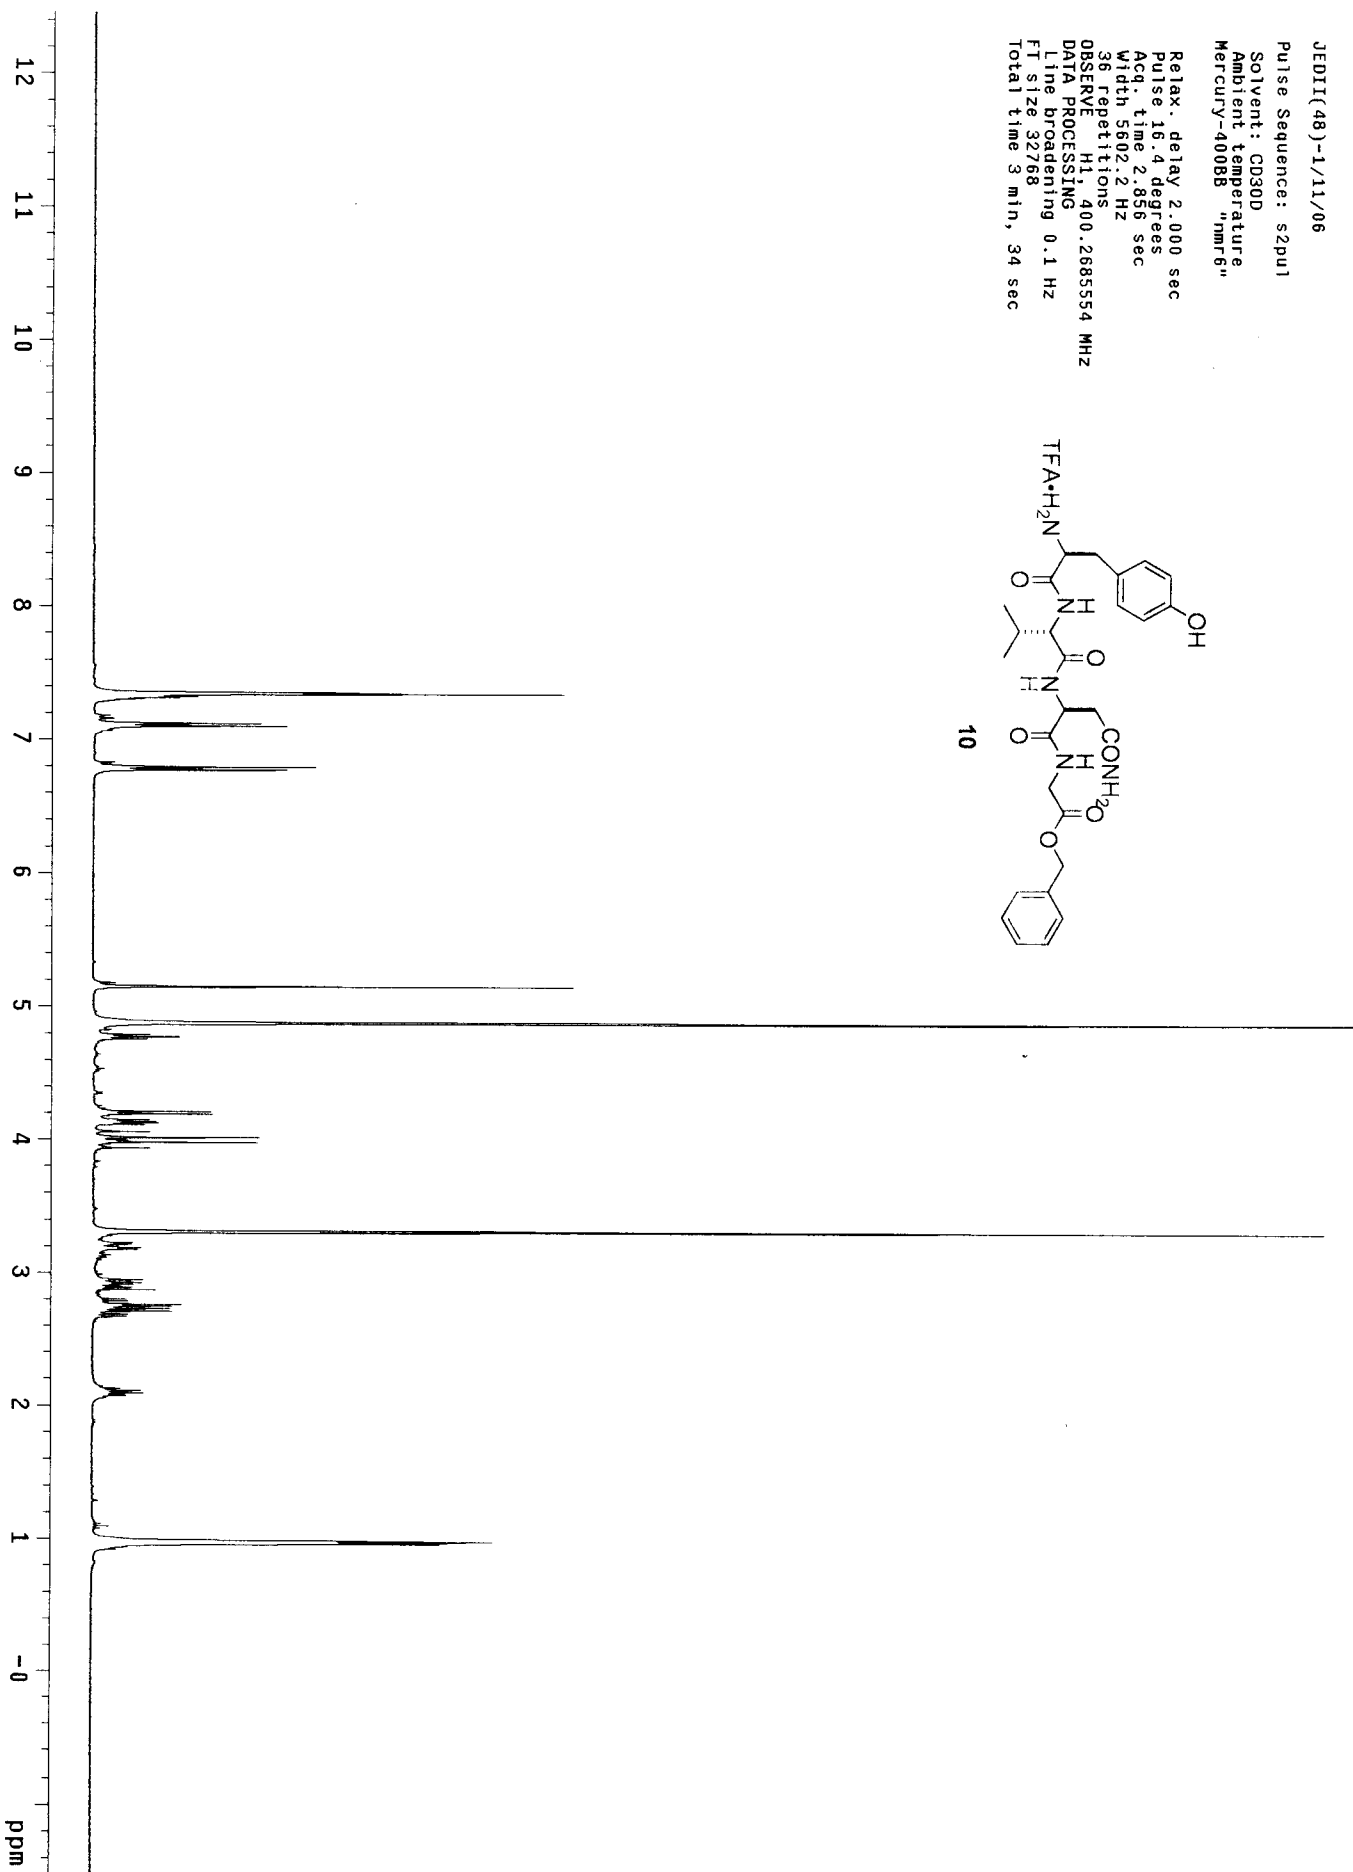



exp4 s2pu1

SAMPLE DEC. 4 VT 499.351  
date Jan 11 2006 dfrq dn H1  
solvent cd3od exp H1  
file cd3od  
ACQUISITION exp  
sfrq 125.575 dm -500.0  
ln C13 dm YYY W  
dt 1.073 dmf 11000  
np 70058 dseq n  
sw 32539.7 dres 1.0  
fb 18000 homo n  
bs 64 temp 27.0  
ss 64 PROCESSING  
tpwr 54 lb 2.00  
pw 3.0 wflite  
dl 2.000 proc ft  
tof 1881.9 fn not used  
nt 17000 math f  
ct 17000  
atlock n  
gain 50 weff  
flags n wexp  
l1 n wbs  
l2 n wnt  
l3 y  
l4 nm  
hs

DISPLAY  
sp -628.0  
wp 25739.7  
vs 3393  
sc 8  
wc 250  
hzmm 102.96  
ls 90000.00  
lfl 8514.7  
lfp 6152.5  
lth 6  
lins 100.000  
nm cdc ph

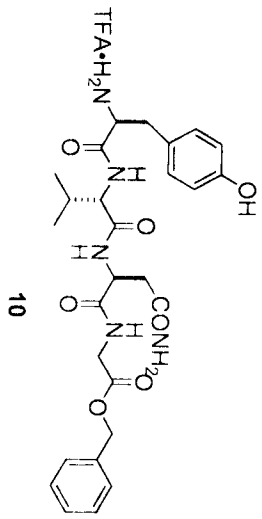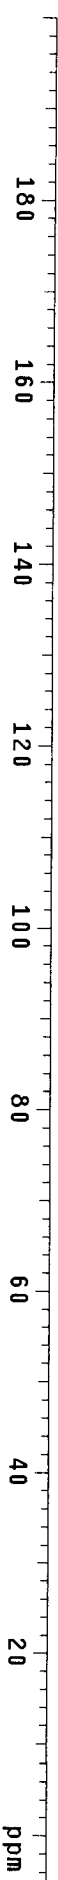

exp1 presat

|         |             |            |            |       |
|---------|-------------|------------|------------|-------|
| SAMPLE  | date        | Oct 5 2005 | satpwr     | -10   |
| SOLVENT | cd3od       | exp        | satpwr     | -65.4 |
| FILE    | ACQUISITION | 499.351    | satmode    | 2.000 |
| IN      | 4.865       | H1         | COMPOSIT   | Ynm   |
| NP      | 64000       | dn         | DEC. & VT  | n     |
| FB      | 6577.3      | dof        |            | H1    |
| BS      | 4000        | dm         |            | -65.4 |
| SS      | 32          | dmm        |            | nm    |
| TPWR    | 54          | dmf        |            | c     |
| PW      | 2.0         | temp       | PROCESSING | 200   |
| DI      | 0           | 1b         | 0.10       | 27.0  |
| TOF     | 297.6       | wtfile     |            |       |
| NT      | 64          | proc       | not used   |       |
| CT      | 64          | fn         |            |       |
| ALOCK   | n           | math       |            |       |
| GAIN    | 40          | weff       |            |       |
| FL      | n           | wexp       |            |       |
| IN      | n           | y          |            |       |
| DP      | nm          | wnt        |            |       |
| HS      | nm          |            |            |       |

SATURATION

|      |         |     |  |
|------|---------|-----|--|
| SP   | -249.9  | WFT |  |
| WP   | 5243.1  |     |  |
| VS   | 651     |     |  |
| SC   | 0       |     |  |
| WC   | 250     |     |  |
| HZMM | 20.97   |     |  |
| IS   | 7224.22 |     |  |
| RF1  | 2155.0  |     |  |
| RF2  | 1847.9  |     |  |
| TH   | 5       |     |  |
| INS  | 2.000   |     |  |
| AI   | cdc     |     |  |
|      | ph      |     |  |

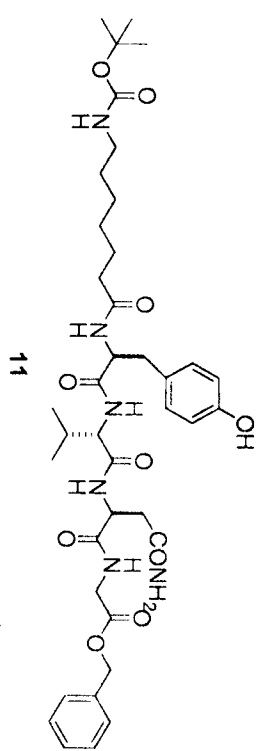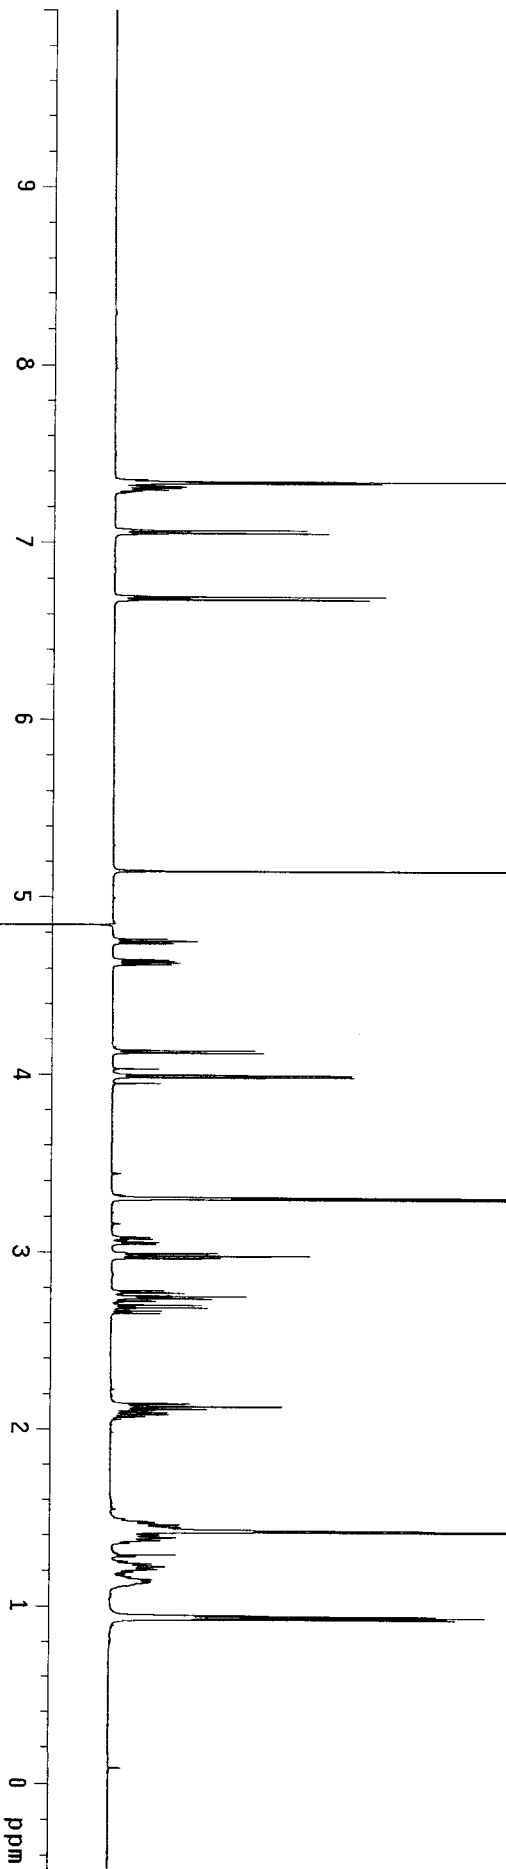

exp4 s2pul

SAMPLE DEC. & VT 499.351  
 date Oct 5 2005 dfrq H1  
 solvent cd3od dn H1  
 file exp dpwr 44  
 ACQUISITION exp dof -500.0  
 sfrq 125.575 dm YYY  
 tn C13 dmm W  
 at 1.073 dmf 11000  
 np 70058 dres n  
 sw 32639.7 dres 1.0  
 fb 18000 homo n  
 bs 64 temp 27.0  
 ss 64 PROCESSING  
 tpwr 54 lb 2.00  
 pw 3.0 wfile  
 dl 2.000 proc ft  
 tof 1881.9 fn not used  
 nt 16000 math f  
 ct 16000  
 alock n weff  
 gain 50 wexp  
 flags n wbs  
 il n wnt  
 in y  
 dp n  
 hs nm

DISPLAY  
 sp -628.0  
 wp 25739.7  
 vs 3912  
 sc 3912  
 wc 250  
 hzmm 102.96  
 is 90000.00  
 rfl 8514.2  
 rfp 6152.5  
 th 5  
 ins 100.000  
 nm cdc ph

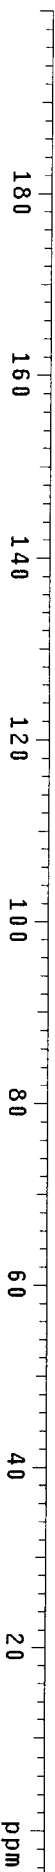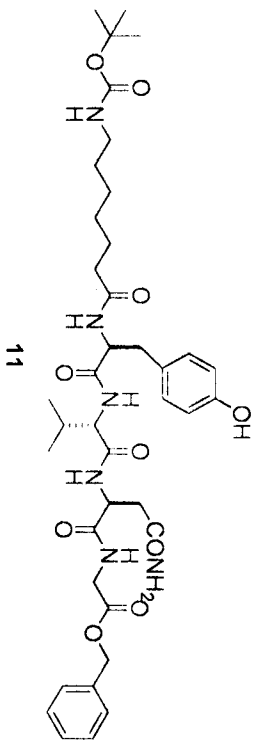

JEDI(58)-1/28/06

Pulse Sequence: s2pu1

Solvent: CD3OD

Ambient temperature

Mercury-400BB "nmr8"

Relax. delay 2.000 sec

Pulse 16.4 degrees

Acq. time 2.856 sec

Width 5602.2 Hz

128 repetitions

OBSERVE H1, 400.2685554 MHz

DATA PROCESSING

Line broadening 0.1 Hz

FT size 32768

Total time 0 min, 0 sec

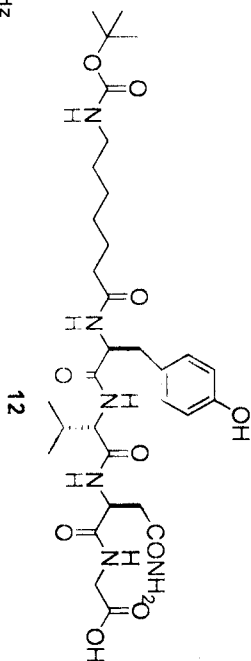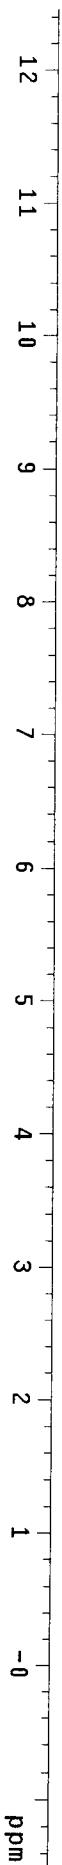

exp4 Carbon

|             |       |             |            |         |
|-------------|-------|-------------|------------|---------|
| SAMPLE      | date  | Apr 20 2010 | SPECIAL    | 27.0    |
| solvent     | cd3od |             | gain       | 30      |
| file        | exp   |             | sp in      | 20      |
| ACQUISITION | sw    | 40322.6     | hst        | 0.008   |
|             | at    | 2.000       | pw90       | 7.800   |
|             | np    | 161290      | alfa       | 10.000  |
|             | fb    | 17000       | FLAGS      |         |
|             | bs    | 64          |            |         |
|             | di    | 2.000       |            |         |
|             | nt    | 13000       |            |         |
|             | ct    | 13000       |            |         |
| TRANSMITTER | tn    | G13         | PROCESSING | 0.50    |
|             | sfrq  | 150.824     | fn         | 262144  |
| tof         |       | 2296.4      | DISPLAY    | -754.2  |
| tpwr        |       | 58          | wp         | 30915.4 |
| pw          |       | 2.600       | rf1        | 10747.0 |
| DECOUPLER   |       | H1          | rfp        | 7389.6  |
| dn          |       | 0           | tp         | 211.0   |
| dof         |       | 0           | PL0T       | 15.1    |
| dm          | YYY   |             | WC         | 250     |
| dmm         | w     |             | SC         | 0       |
| dpwr        | 46    |             | VS         | 132082  |
| dmf         | 15337 |             | tn         | 7       |
|             |       |             | at         | cdc ph  |

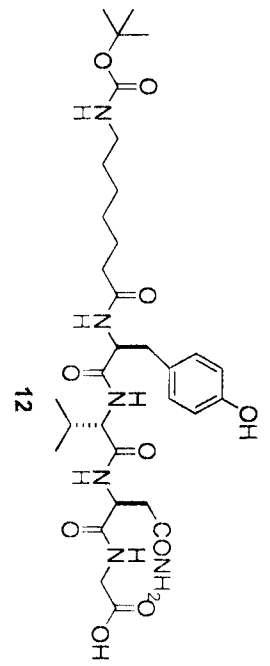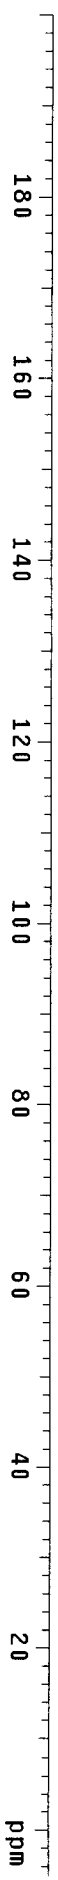

JEDI(60)-1/28/06

Pulse Sequence: s2pu1  
Solvent: CD300  
Ambient temperature  
Mercury-400BB "nmr6"

Relax. delay 2.000 sec  
Pulse: 16.4 degrees  
Acq. time 2.856 sec  
Width 5602.2 Hz  
156 repetitions  
OBSERVE H1, 400.2685554 MHz  
DATA PROCESSING  
Line broadening 0.1 Hz  
FT size 32768  
Total time 25 min, 23 sec

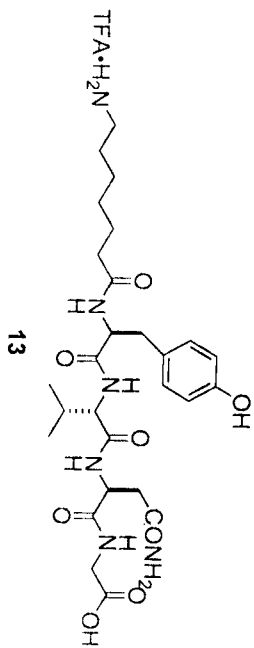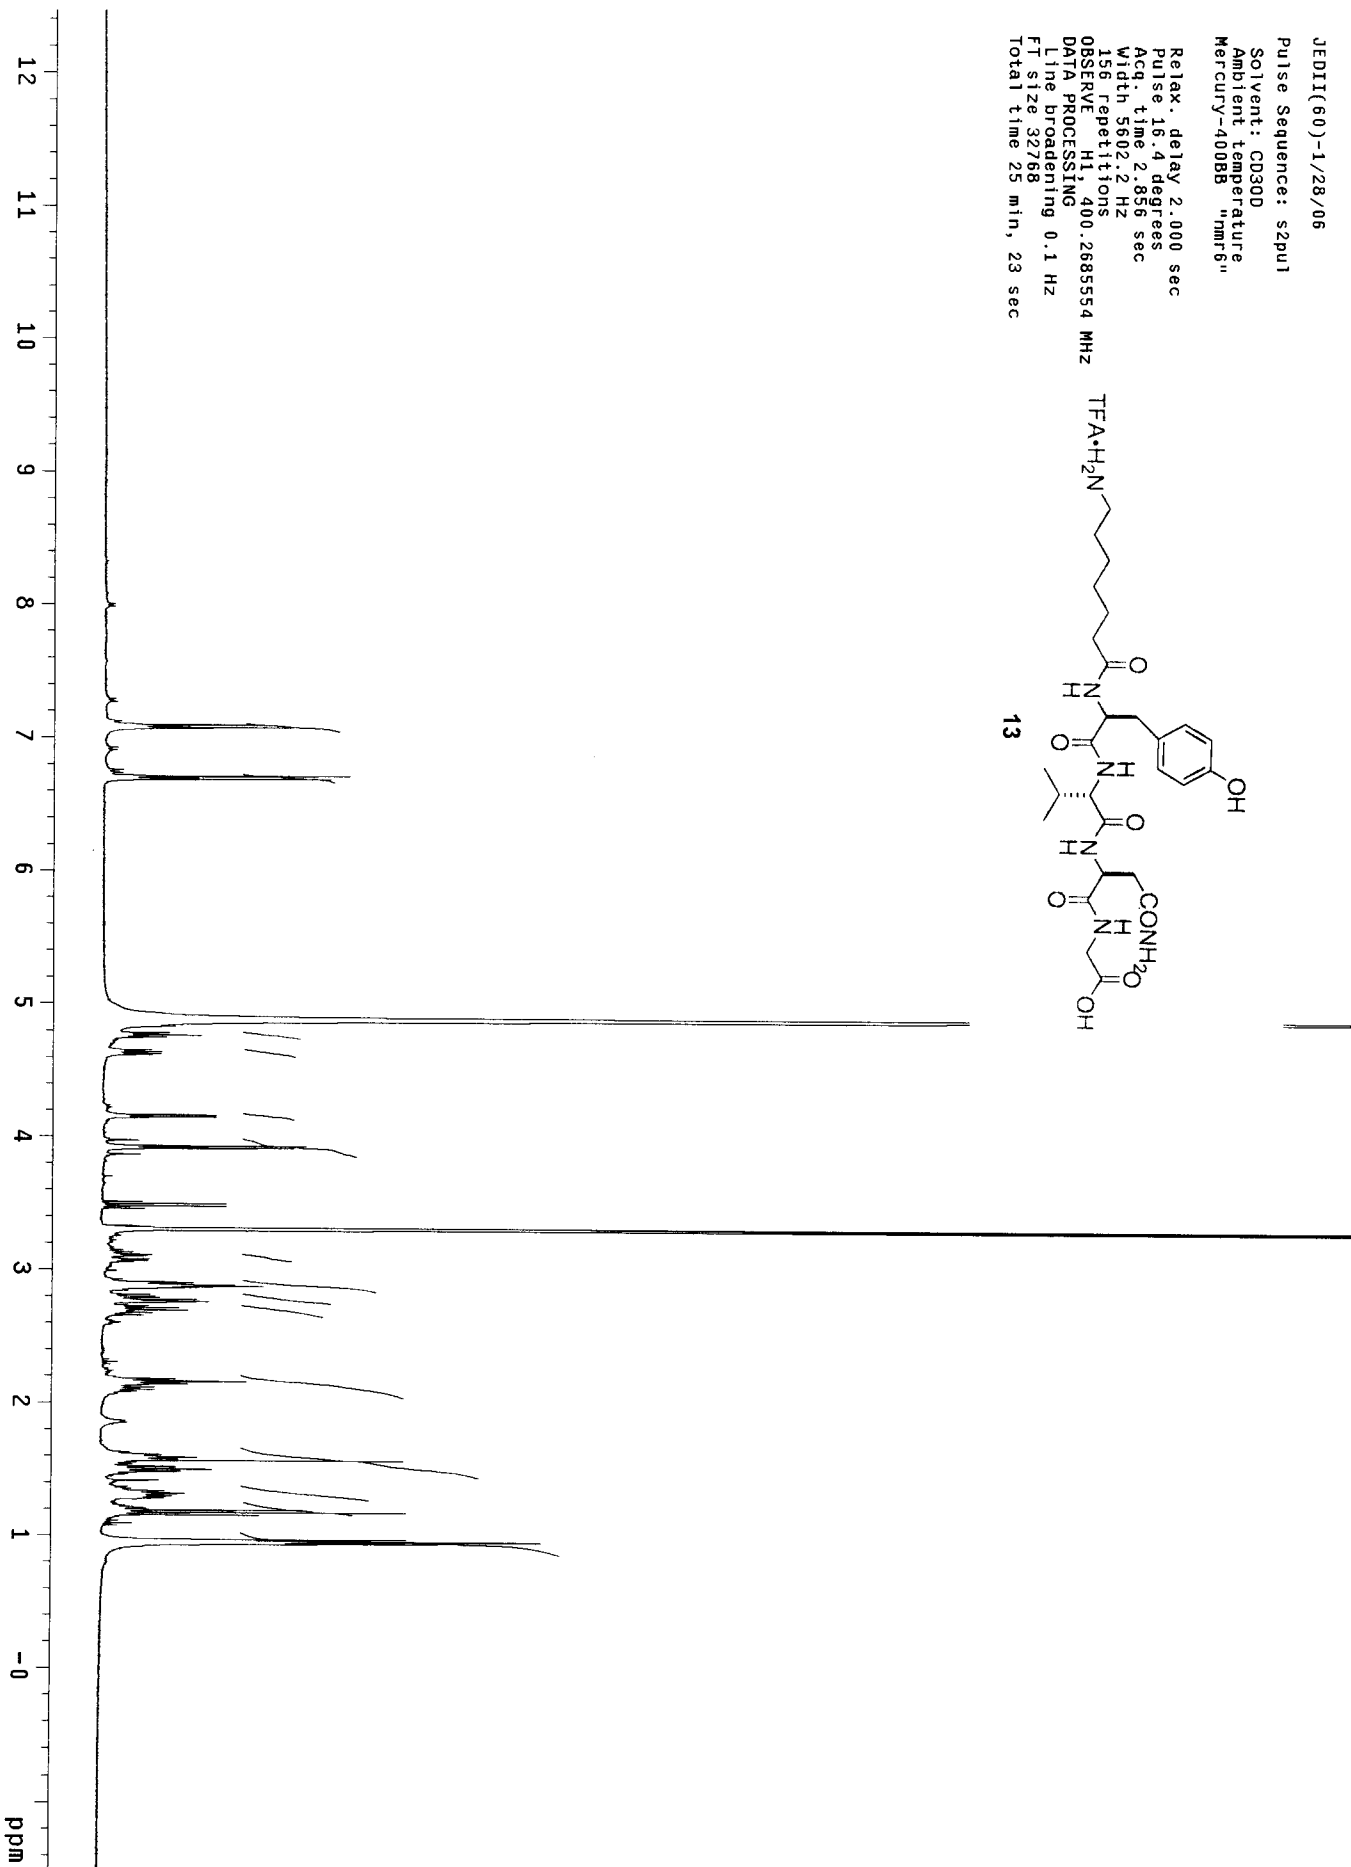

Archive directory:  
Sample directory:

Pulse Sequence: szpu1

Solvent: cd3od  
Ambient temperature  
User: 1-14-87  
File: jed20pyvng\_s2pu1\_C13  
INOVA-500 "nmrastpro"

Relax. delay 2.000 sec  
Pulse 30.0 degrees  
Acq. time 1.300 sec  
Width 24509.8 Hz  
5000 repetitions  
OBSERVE C13, 100.5312306 MHz  
DECUPLE H1, 339.8082857 MHz  
Power 44 db  
continuously on  
WALTZ-16 modulated  
DATA PROCESSING  
Line broadening 2.0 Hz  
F1 size 65536  
Total time 4 hr, 35 min, 47 sec

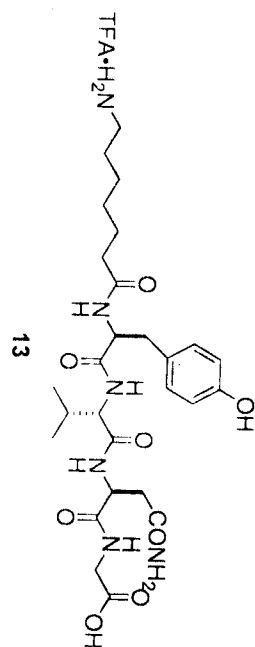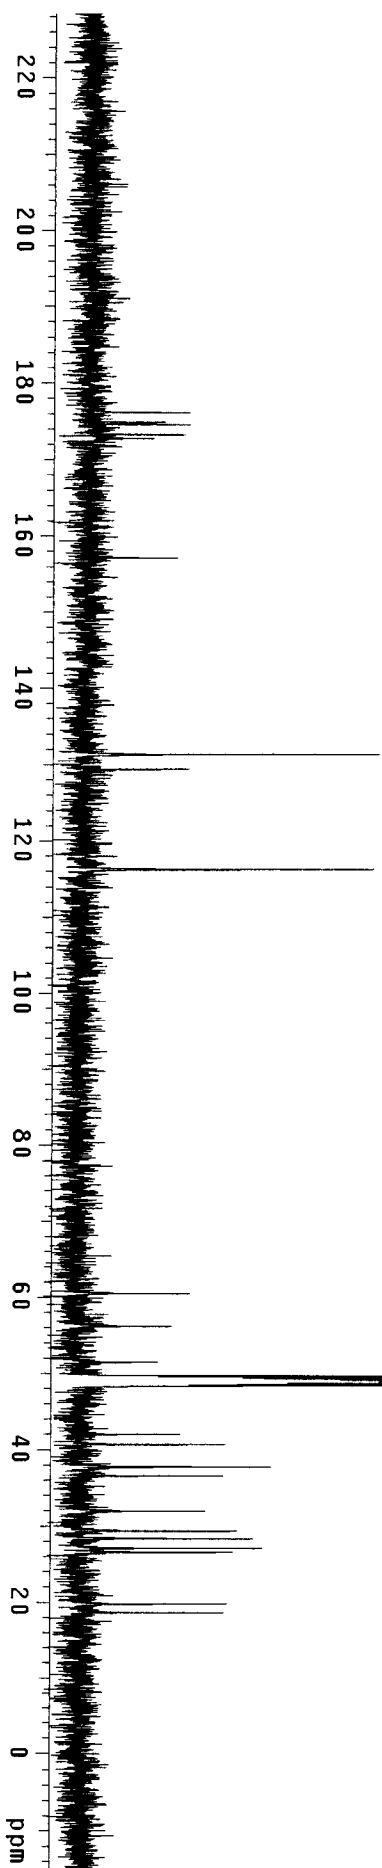

JEDI-253  
 jed1235\_h1

exp1 presat

|             |             |           |            |
|-------------|-------------|-----------|------------|
| date        | Sep 20 2005 | SSPUL     | SATURATION |
| solvent     | cd3od       | satpw     | n          |
| file        | exp         | satfrq    | -12        |
| ACQUISITION | 499.870     | satdly    | 2.000      |
| sfrq        | H1          | satmode   | Ynn        |
| in          | 3.996       | composit  | n          |
| at          | 73980       | DEC. & VT | H1         |
| np          | 9256.0      | dn        | -73.7      |
| sw          | 5000        | dof       | mmn        |
| fb          | 32          | dm        | C          |
| bs          | 57          | dmm       | 200        |
| ss          | 2.0         | dmf       | 30         |
| tpwr        | 2.0         | dpr       | 27.0       |
| pw          | 0           | temp      | PROCESSING |
| di          | 1124.6      | lb        | 0.10       |
| tof         | 64          | wfile     |            |
| nt          | 64          | proc      | ft         |
| ct          | n           | fn        | not used   |
| atlock      | 30          | math      | f          |
| gain        |             |           |            |
| FLAGS       |             |           |            |
| il          | n           | werr      |            |
| in          | n           | wexp      |            |
| dp          | y           | wbs       |            |
| hs          | mn          | wnt       |            |

|      |         |         |     |
|------|---------|---------|-----|
| SP   | -250.1  | DISPLAY | wft |
| WP   | 5248.5  |         |     |
| VS   | 1533    |         |     |
| SC   | 0       |         |     |
| WC   | 250     |         |     |
| hzmh | 20.99   |         |     |
| IS   | 7934.13 |         |     |
| rfl  | 2667.7  |         |     |
| rffp | 1649.6  |         |     |
| th   | 6       |         |     |
| ins  | 1.000   |         |     |
| ai   |         |         |     |

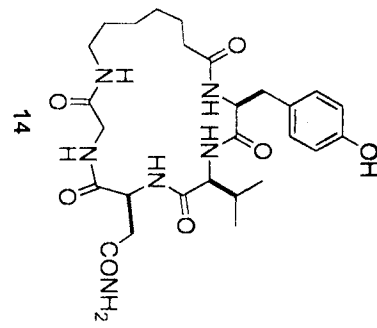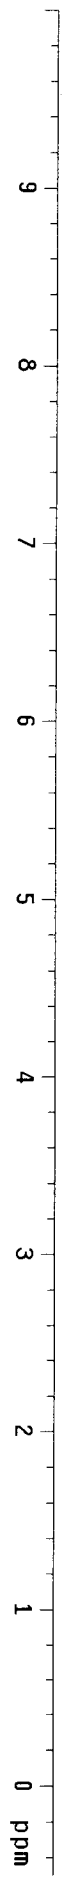



JEDI-253  
jed1253\_c13

exp4 s2pu1

|             |            |          |           |
|-------------|------------|----------|-----------|
| date        | SAMPLE     | dfreq    | DEC. & VT |
| Sep 20 2005 | cd30d      | 499.869  | H1        |
| solvent     | exp        | 37       |           |
| file        | dpwr       | 0        |           |
| ACQUISITION | dof        | 0        |           |
| 125.706     | dm         | yyy      | w         |
| C13         | dmm        | 10582    |           |
| 1.279       | dmt        |          |           |
| 85262       | dseq       |          |           |
| 3333.3      | dres       | 1.0      |           |
| not used    | homo       | n        |           |
| 64          | temp       | 27.0     |           |
| 53          | PROCESSING | 1.00     |           |
| 3.0         | lb         |          |           |
| 2.000       | wfille     |          |           |
| 2198.1      | proc       | ft       |           |
| 10000       | fn         | not used |           |
| 10000       | math       | f        |           |
| gain        | 60         | werr     |           |
| FLAGS       | n          | wexp     |           |
| in          | n          | wbs      |           |
| in          | n          | wrl      |           |
| dp          | y          |          |           |
| hs          | m          |          |           |

DISPLAY -628.7  
 sp 25766.5  
 wp 6236  
 vs 0  
 sc 250  
 WC 103.07  
 hzmm 500.00  
 IS 8538.8  
 rfl 6158.9  
 rfp 0  
 th 0  
 ins 100.000  
 ai cdc ph

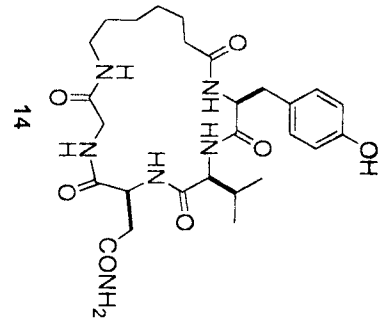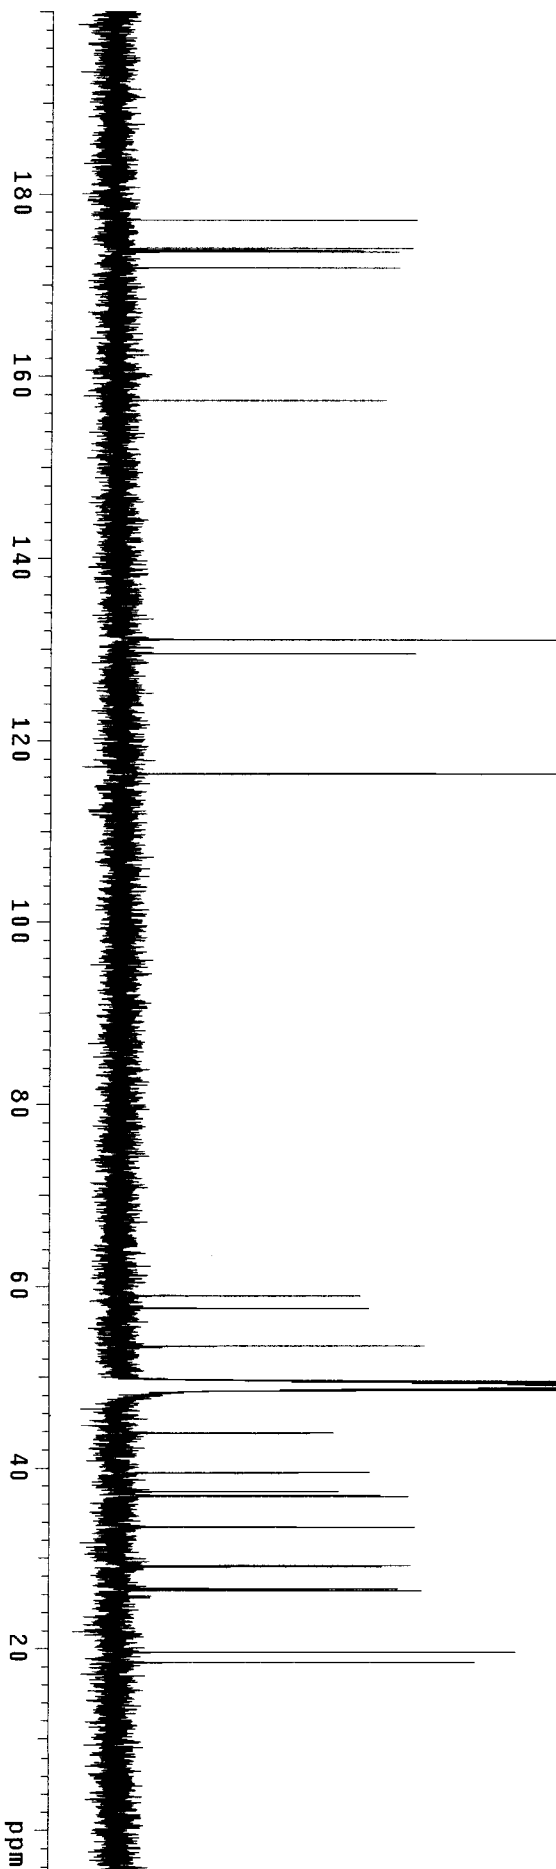

JEDI-257

expl presat

|         |             |             |          |            |   |
|---------|-------------|-------------|----------|------------|---|
| SAMPLE  | date        | Sep 27 2005 | sspul    | SATURATION | n |
| solvent | cd3od       | exp         | satpwr   | -10        |   |
| file    | ACQUISITION | 499.351     | satfrq   | -61.2      |   |
| sfreq   | 499.351     | HI          | satmode  | 2.000      |   |
| ln      | 4.865       | HI          | composit | ynn        |   |
| at      | 64000       | DEC. & VT   | n        |            |   |
| np      | 6577.3      | dm          | dn       | H1         |   |
| sw      | 4000        | dm          | dof      | -61.2      |   |
| fb      | 32          | dmm         | dm       | nm         |   |
| bs      | 54          | dmf         | c        | c          |   |
| ss      | 2.0         | dpwr        | 2        | 200        |   |
| tpwr    | 2.0         | temp        | 27.0     | 30         |   |
| pw      | 0           | PROCESSING  | 0.10     |            |   |
| di      | 297.6       | 1b          | wf1      |            |   |
| tof     | 64          | wf1         |          |            |   |
| nt      | 64          | proc        |          |            |   |
| ct      | n           | fn          |          |            |   |
| alock   | n           | math        |          |            |   |
| gain    | 40          | not used    |          |            |   |
| FLAGS   |             | f           |          |            |   |
| fl      | n           | werr        |          |            |   |
| in      | n           | wexp        |          |            |   |
| dp      | Y           | wbs         |          |            |   |
| hs      | nm          | wnt         |          |            |   |

|      |          |         |     |
|------|----------|---------|-----|
| SP   | -249.9   | DISPLAY | wf1 |
| WP   | 5243.1   |         |     |
| VS   | 3047     |         |     |
| SC   | 0        |         |     |
| WC   | 250      |         |     |
| h2mm | 20.97    |         |     |
| IS   | 11634.47 |         |     |
| rfl  | 2155.0   |         |     |
| rffp | 1647.9   |         |     |
| th   | 2        |         |     |
| ins  | 1.000    |         |     |
| ai   | cdc      | ph      |     |

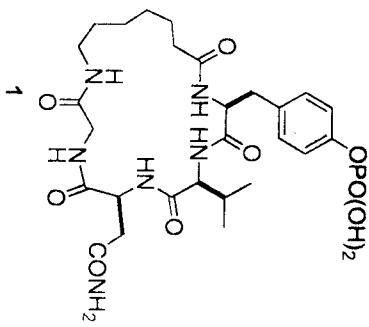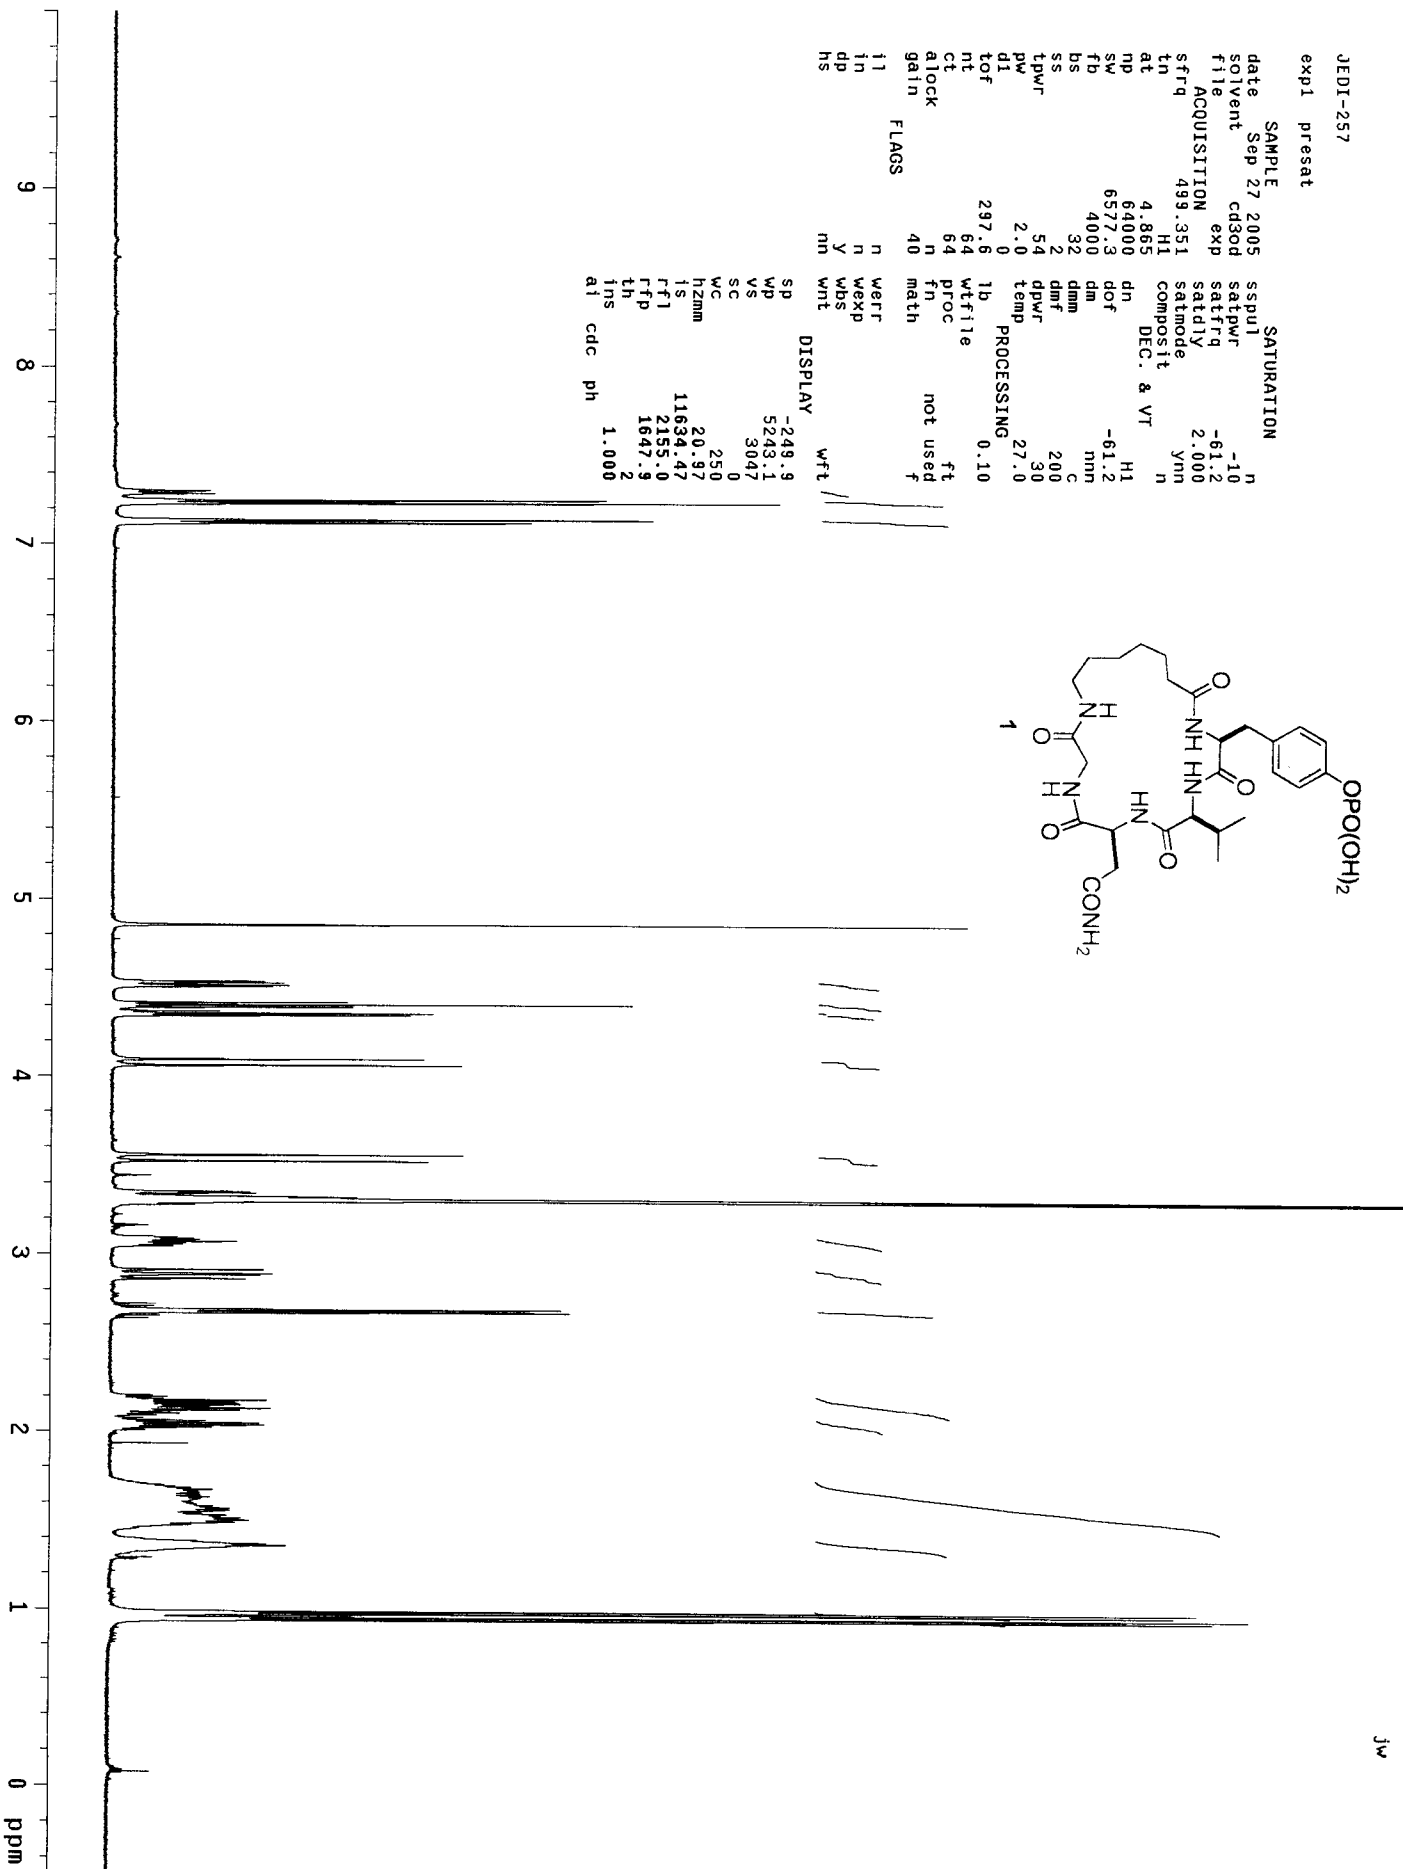

exp4 szpu1

SAMPLE Sep 27 2005 DEC. & VT 499.351  
 solvent cd3od dn  
 file exp dpwr H1  
 ACQUISITION 44  
 sfrq 125.575 dm -500.0  
 tn C13 dnm YYY  
 at 1.073 dmf W  
 np 7.0058 dseq 11000  
 sw 32639.7 dres 1.0  
 fb 18000 homo n  
 bs 64 temp 27.0  
 ss 128 PROCESSING 2.00  
 tpwr 54 lb  
 pw 3.0 wfile  
 dl 2.000 proc ft  
 tof 1881.9 fn not used  
 nt 14000 math f  
 ct 14000  
 alock n  
 gain 50 weff  
 flags n wexp  
 il n wbs  
 in n wnt  
 dp y  
 hs nm

DISPLAY  
 sp -628.0  
 wp 25739.7  
 vs 9937  
 sc 0  
 mc 250  
 hzmm 102.96  
 ts 90000.00  
 rftl 8513.7  
 rffp 6152.5  
 th 10  
 ins 100.000  
 nm cdc ph

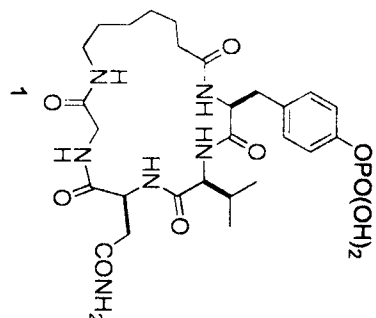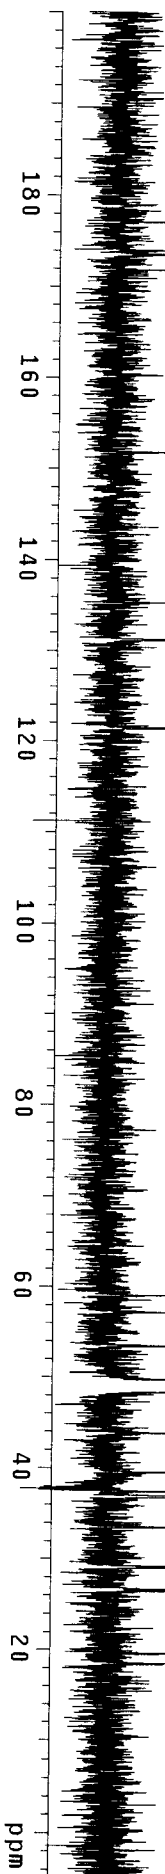

JEDVII(68)

Pulse Sequence: s2pu1  
Solvent: cd3od  
Ambient temperature  
Mercury-400DB "mmr6"

Relax. delay 2.000 sec  
Pulse 16.4 degrees  
Acq. time 2.856 sec  
Width 5602.2 Hz  
24 repetitions  
OBSERVE H1, 400.2685529 MHz  
DATA PROCESSING  
Line broadening 0.1 Hz  
FT size 32768  
Total time 2 min, 48 sec

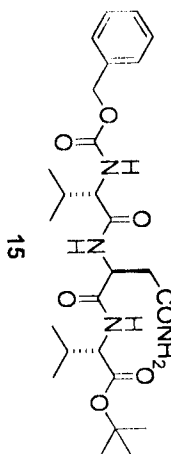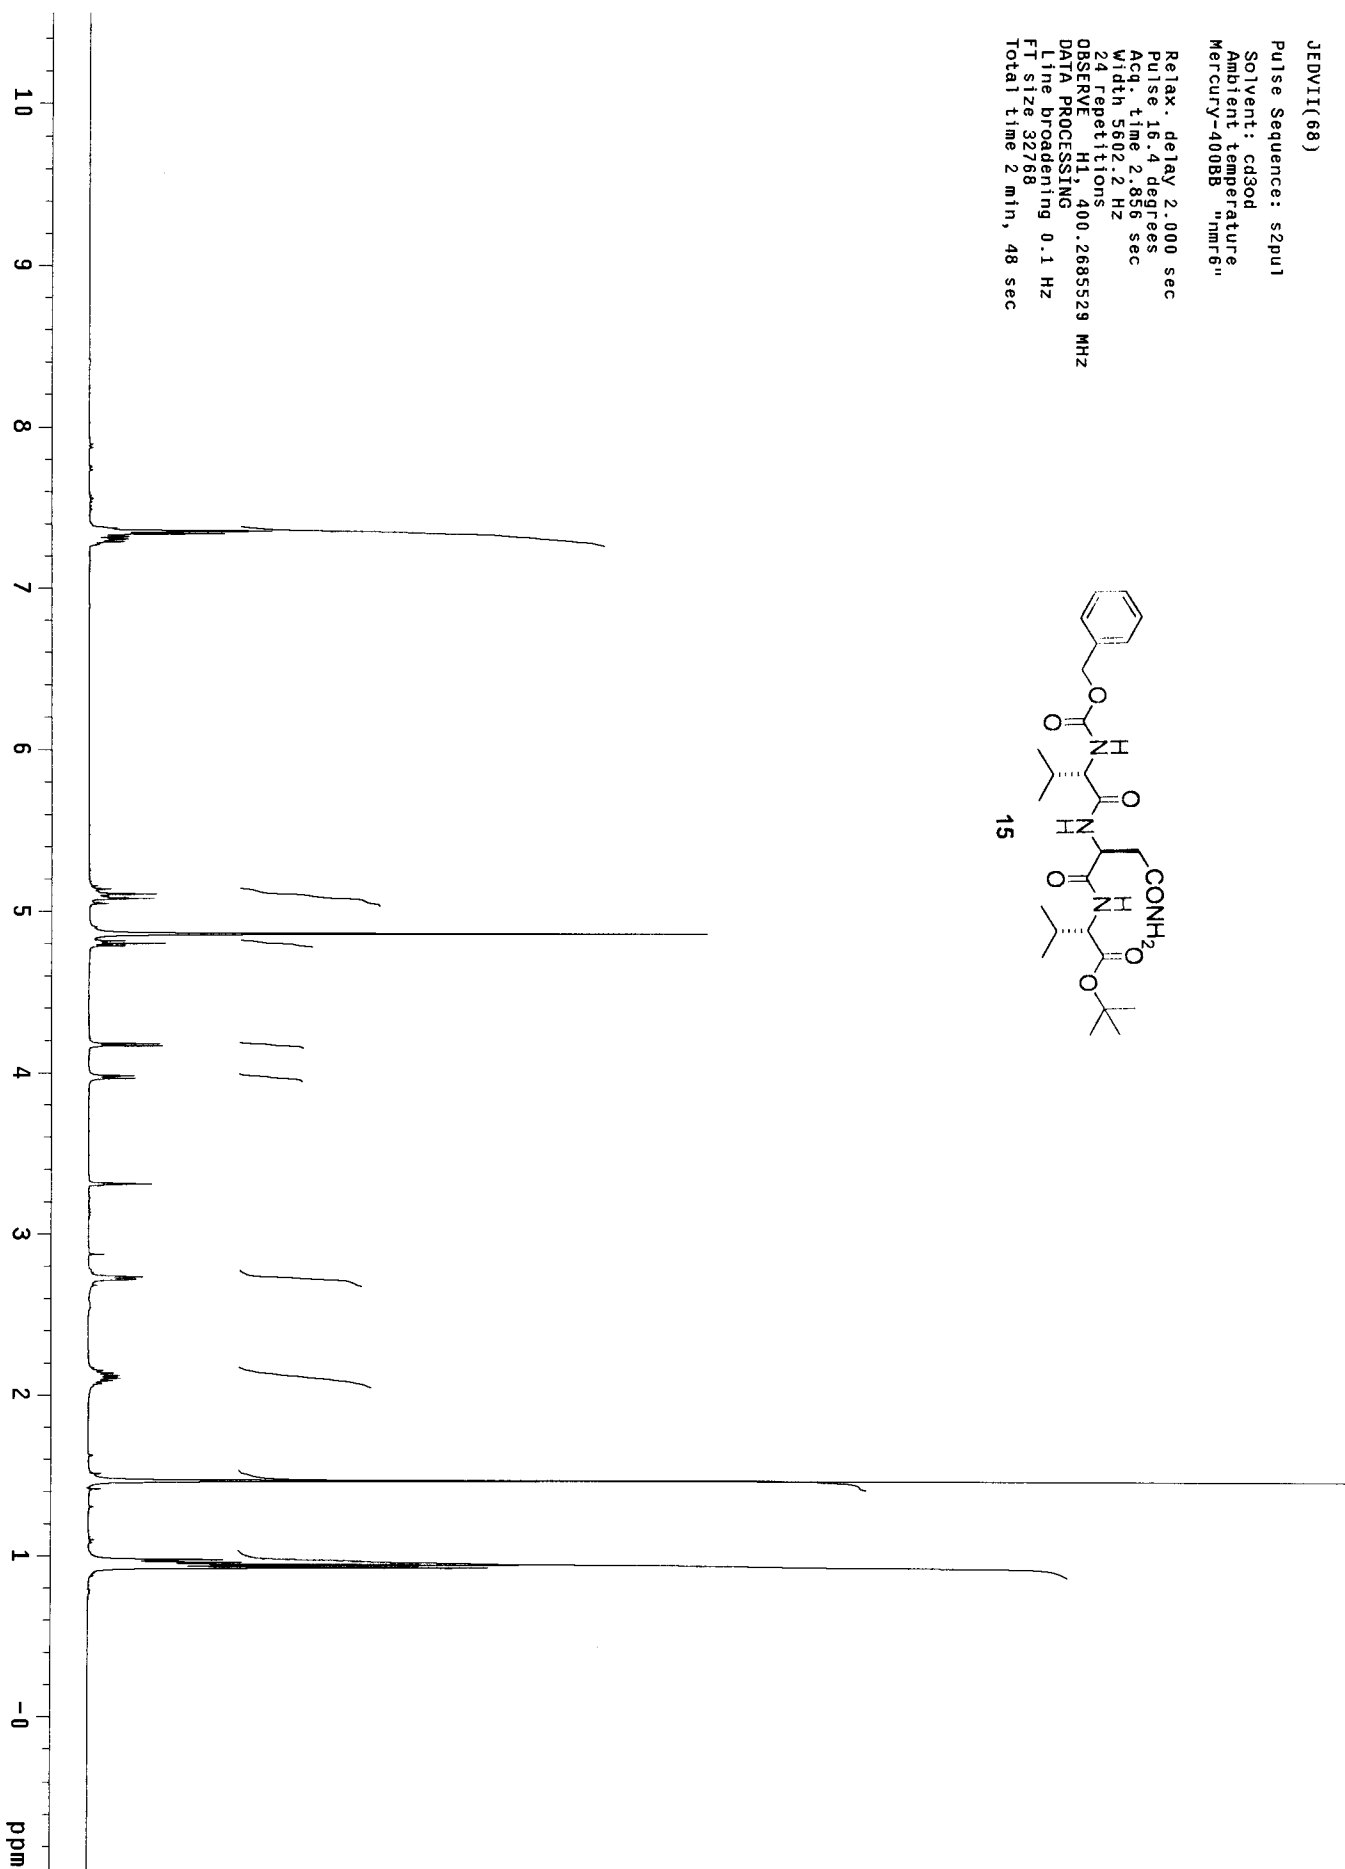

13C OBSERVE

Pulse Sequence: s2pu1  
Solvent: cd3od  
Ambient temperature  
File: Jed7-68  
INOVA-500 "mmrastro"

Relax. delay 2.000 sec  
Pulse: 36.0 degrees  
Acq. time 1.777 sec  
Width 18009.9 Hz  
304 repetitions  
OBSERVE C13, 75.4700973 MHz  
DECUPLE H1, 300.1421085 MHz  
Power 40 dB  
continuously on  
WALTZ-16 modulated  
Single precision data  
DATA PROCESSING  
Line broadening 1.0 Hz  
Ft size 65536  
Total time 17 hr, 52 min, 35 sec

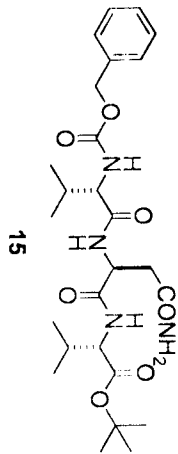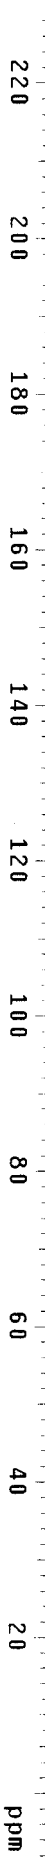

JEDVII(69)

Pulse Sequence: s2pu1  
Solvent: cd3od  
Ambient temperature  
Mercury-400DB "nmr6"

Relax. delay 2.000 sec  
Pulse 16.4 degrees  
Acq. time 2.836 sec  
Width 5602.2 Hz  
32 repetitions  
OBSERVE H1, 400.2685529 MHz  
DATA PROCESSING  
Line broadening 0.1 Hz  
FT size 32768  
Total time 0 min, 0 sec

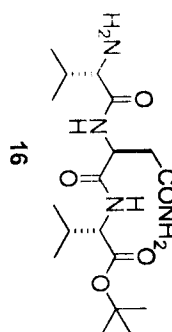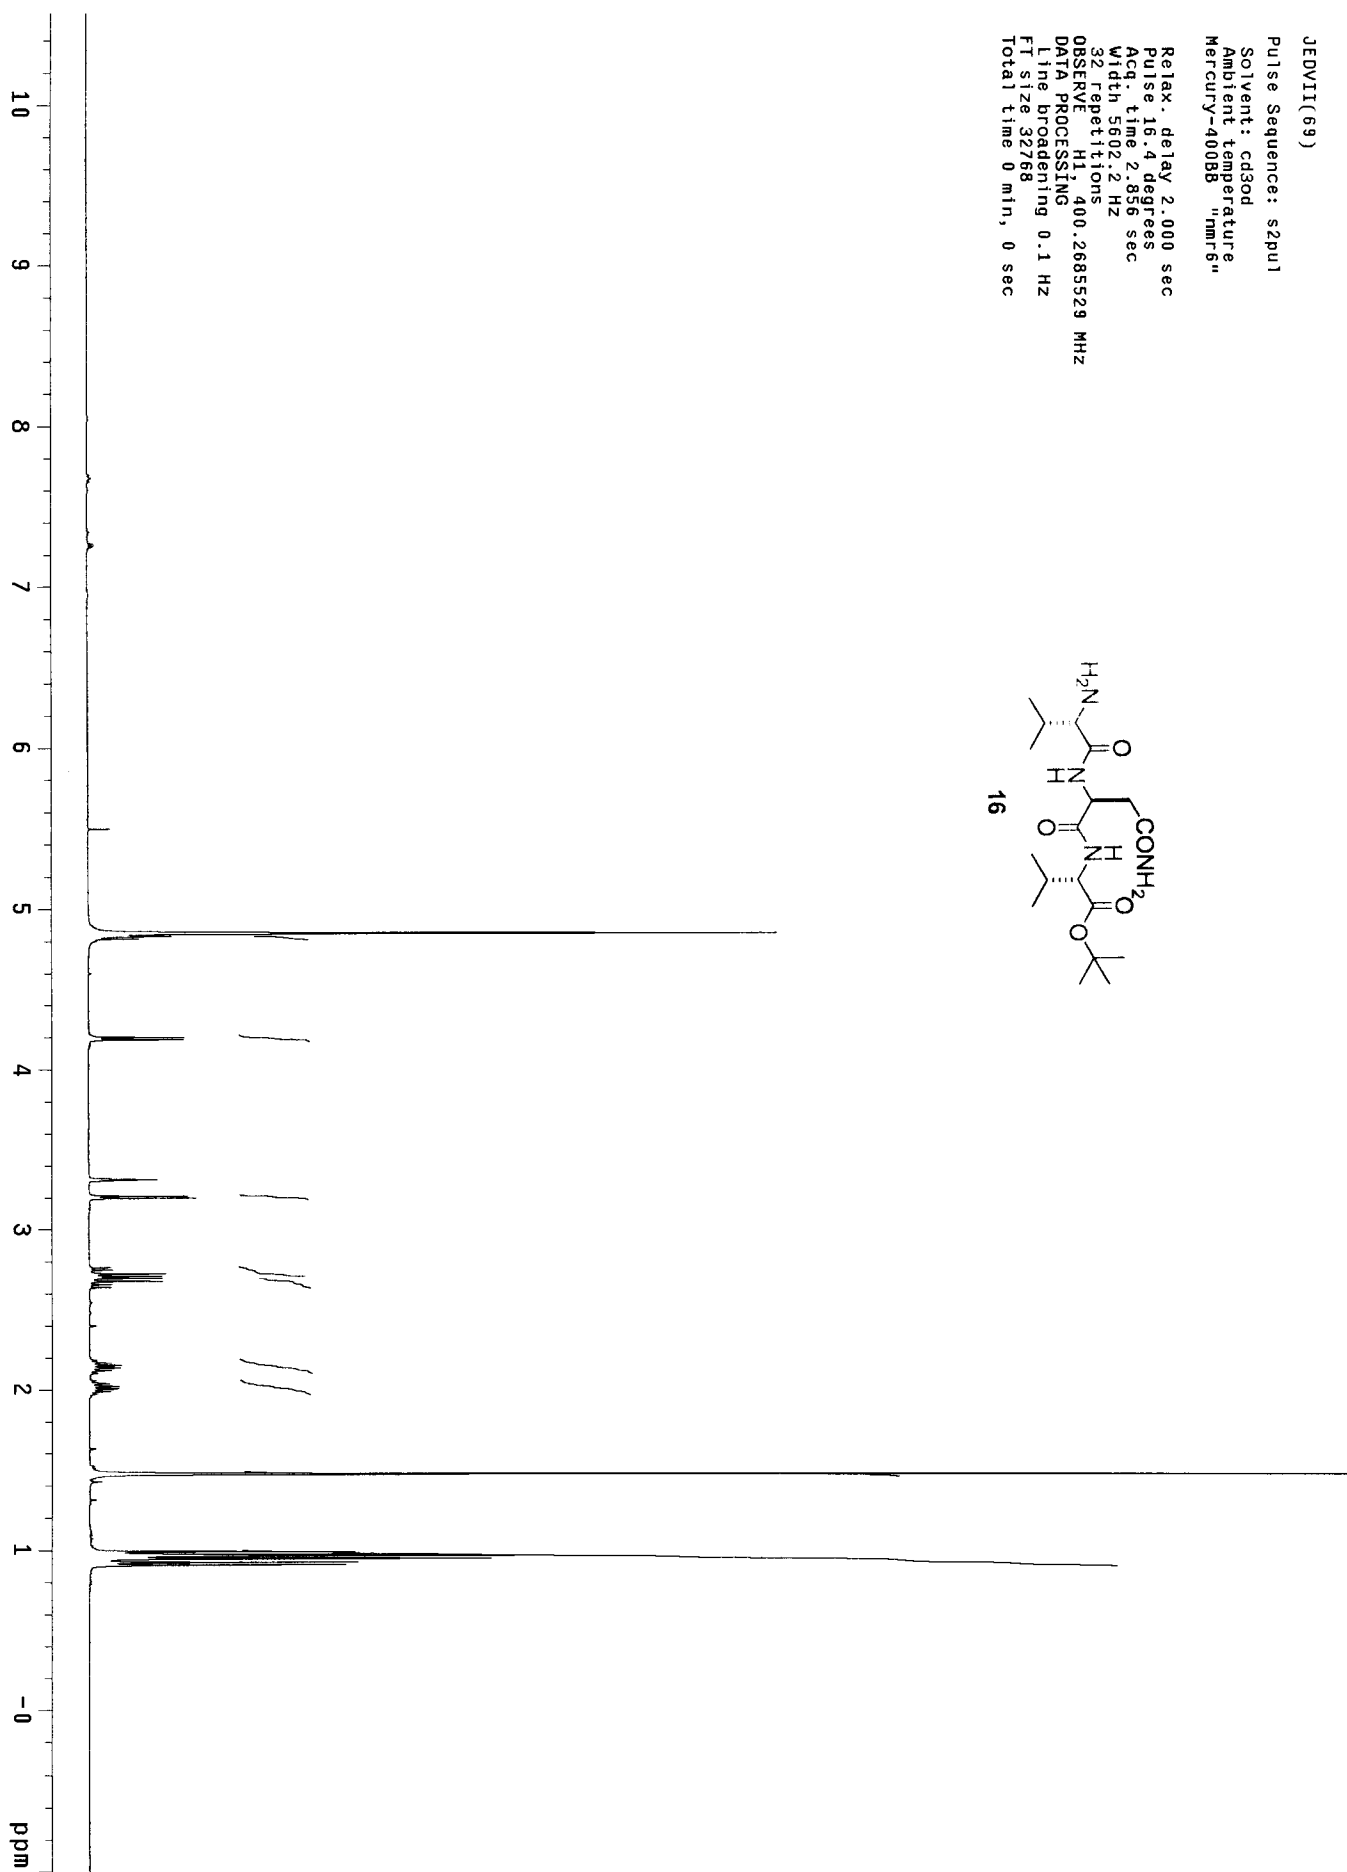

JEDVII(69)

Pulse Sequence: s2pu1

Solvent: cd3od

Ambient temperature

UNITYplus-300 "hmr2"

Relax. delay 2.000 sec

Pulse 36.0 degrees

Acq. time 1.777 sec

Width 18099.9 Hz

735 repetitions

OBSERVE C13, 75.4702105 MHz

DECOUPLE H1, 300.1421085 MHz

Power 40 dB

continuously on

WALTZ-16 modulated

Single precision data

DATA PROCESSING

Line broadening 1.0 Hz

FT size 65536

Total time 17 hr, 53 min, 9 sec

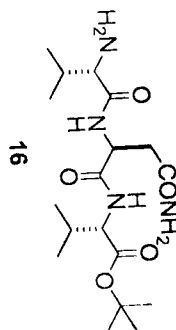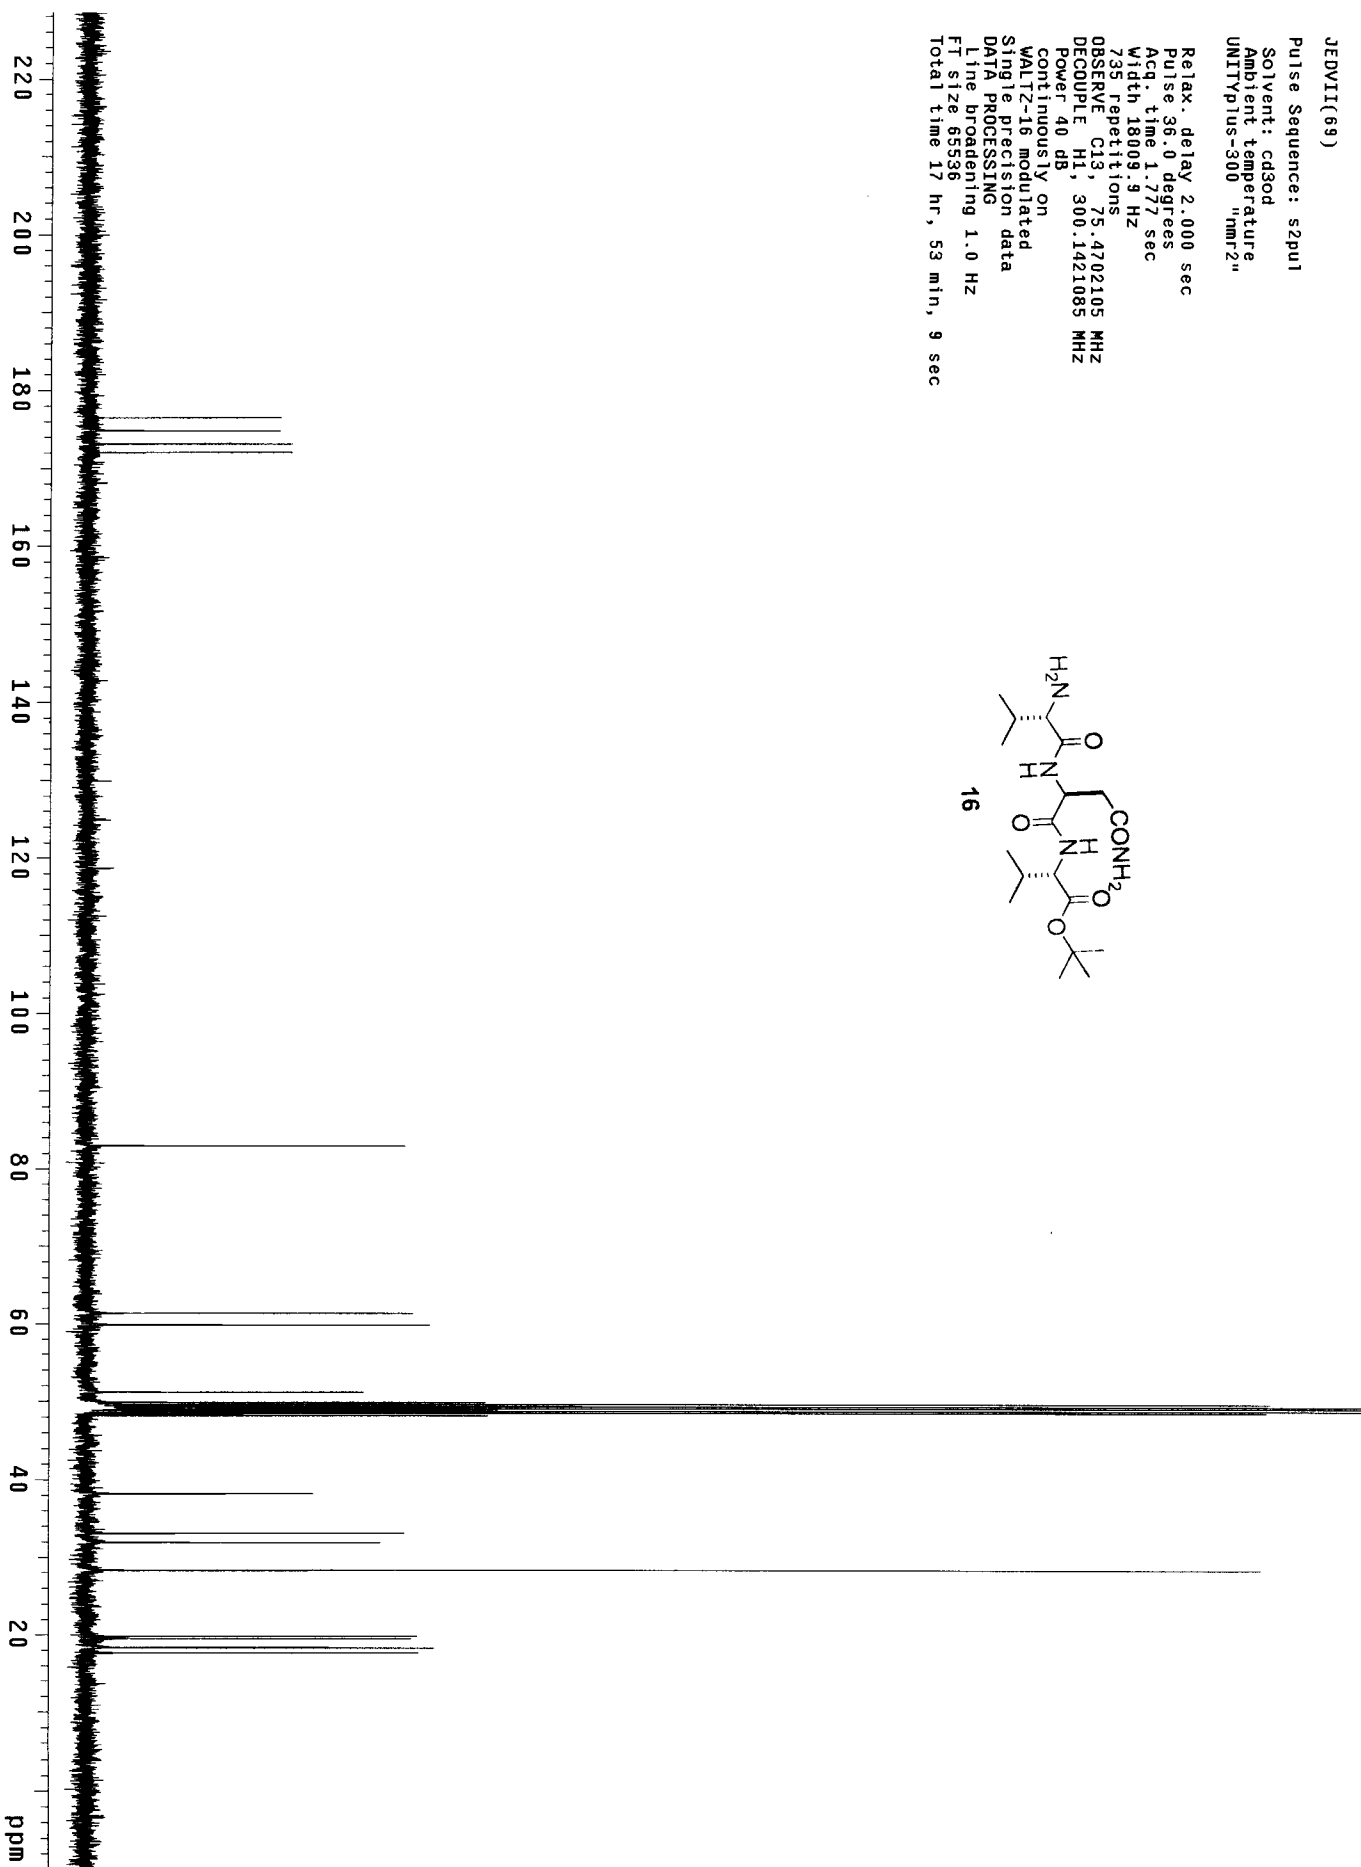

JEDI-144 Z-YVNV-0tBu  
 exp1 szpu1

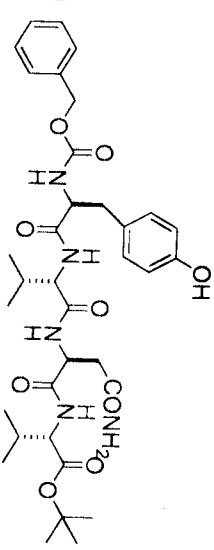

SAMPLE date Jul 29 2005  
 SOLVENT cd3od  
 file exp  
 ACQUISITION 499.351  
 sfrq 499.351  
 ln H1  
 at 4.865  
 np 67384  
 sw 6986.9  
 fb 4000  
 bs 32  
 ss 4  
 tpwr 54  
 pw 2.00  
 di 2.00  
 tof 59.8  
 nt 64  
 ct 64  
 alock n  
 gain 40  
 flags n  
 in n  
 dn y  
 dp n  
 hs nm

DISPLAY -249.8  
 WP 5243.1  
 VS 753  
 SC 0  
 WC 250  
 hzmm 20.97  
 IS 13811.68  
 rfl 2597.8  
 rfp 1647.9  
 th 6  
 ins 2.000  
 ai cdc ph

dfri  
 dn  
 dpwi  
 dof  
 dim  
 dimm  
 dimf  
 dseq  
 dres  
 homo  
 temp  
 PROCESSING 27.0  
 n  
 lb  
 0.10  
 wfile  
 ft  
 not used  
 f  
 math  
 weff  
 wexp  
 wbs  
 wnt

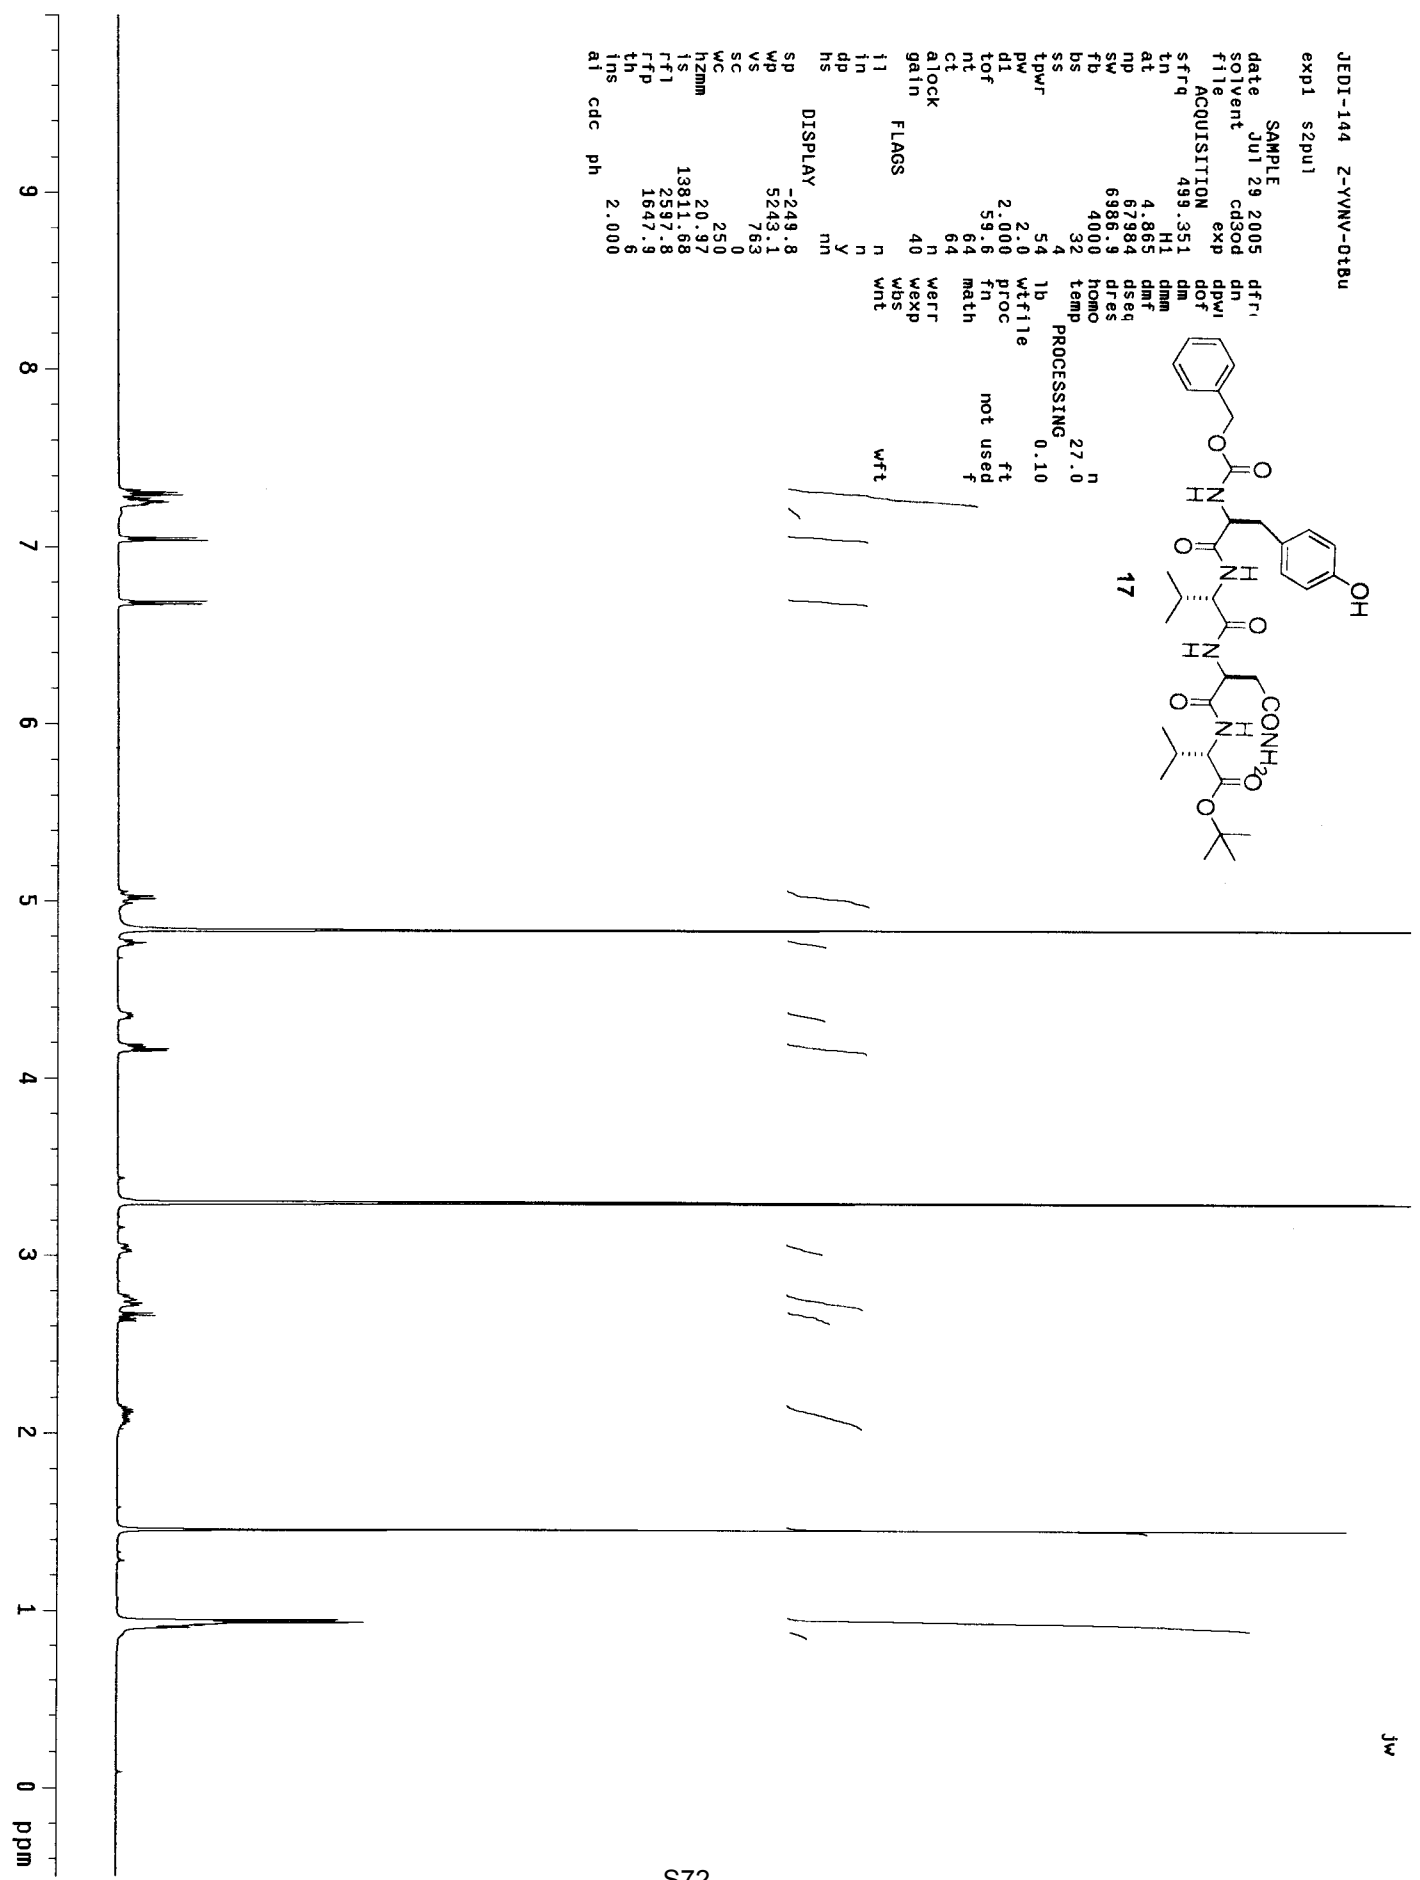



JEDI-144 Z-YVNV-0tBu

exp4 s2pu1

|             |             |            |           |          |
|-------------|-------------|------------|-----------|----------|
| date        | Jul 29 2005 | dfrrq      | DEC. & VT | 499.351  |
| solvent     | cd3od       | dn         | H1        | 44       |
| file        | exp         | dpwr       |           | 44       |
| ACQUISITION |             | dof        |           | -500.0   |
| sfrq        | 125.575     | dm         | YYY       | YYY      |
| in          | G13         | dmm        | W         | W        |
| at          | 1.073       | dmt        |           | 11000    |
| np          | 70058       | dseq       |           |          |
| sw          | 32639.7     | dres       |           | 1.0      |
| fb          | 18000       | homo       |           | n        |
| bs          | 64          | temp       |           | 27.0     |
| ss          | 64          | PROCESSING |           |          |
| tpwr        | 54          | lb         |           | 2.00     |
| pw          | 3.0         | wfille     |           |          |
| di          | 2.000       | proc       |           | ft       |
| tof         | 1881.9      | fn         |           | not used |
| nt          | 17000       | math       |           | f        |
| ct          | 17000       |            |           |          |
| atlock      | n           | werr       |           |          |
| gain        | 50          | wexp       |           |          |
| FLAGS       |             | wbs        |           |          |
| il          | n           | wrl        |           |          |
| in          | n           |            |           |          |
| dp          | y           |            |           |          |
| hs          | nm          |            |           |          |

|      |         |          |
|------|---------|----------|
| SP   | DISPLAY | -628.0   |
| WP   |         | 25739.7  |
| VS   |         | 7678     |
| SC   |         | 0        |
| WC   |         | 250      |
| hzmm |         | 102.96   |
| IS   |         | 90000.00 |
| rfl1 |         | 8513.7   |
| rflp |         | 6152.5   |
| th   |         | 9        |
| ins  |         | 100.000  |
| nm   | cdc     | ph       |

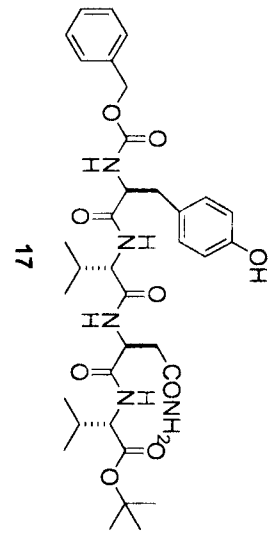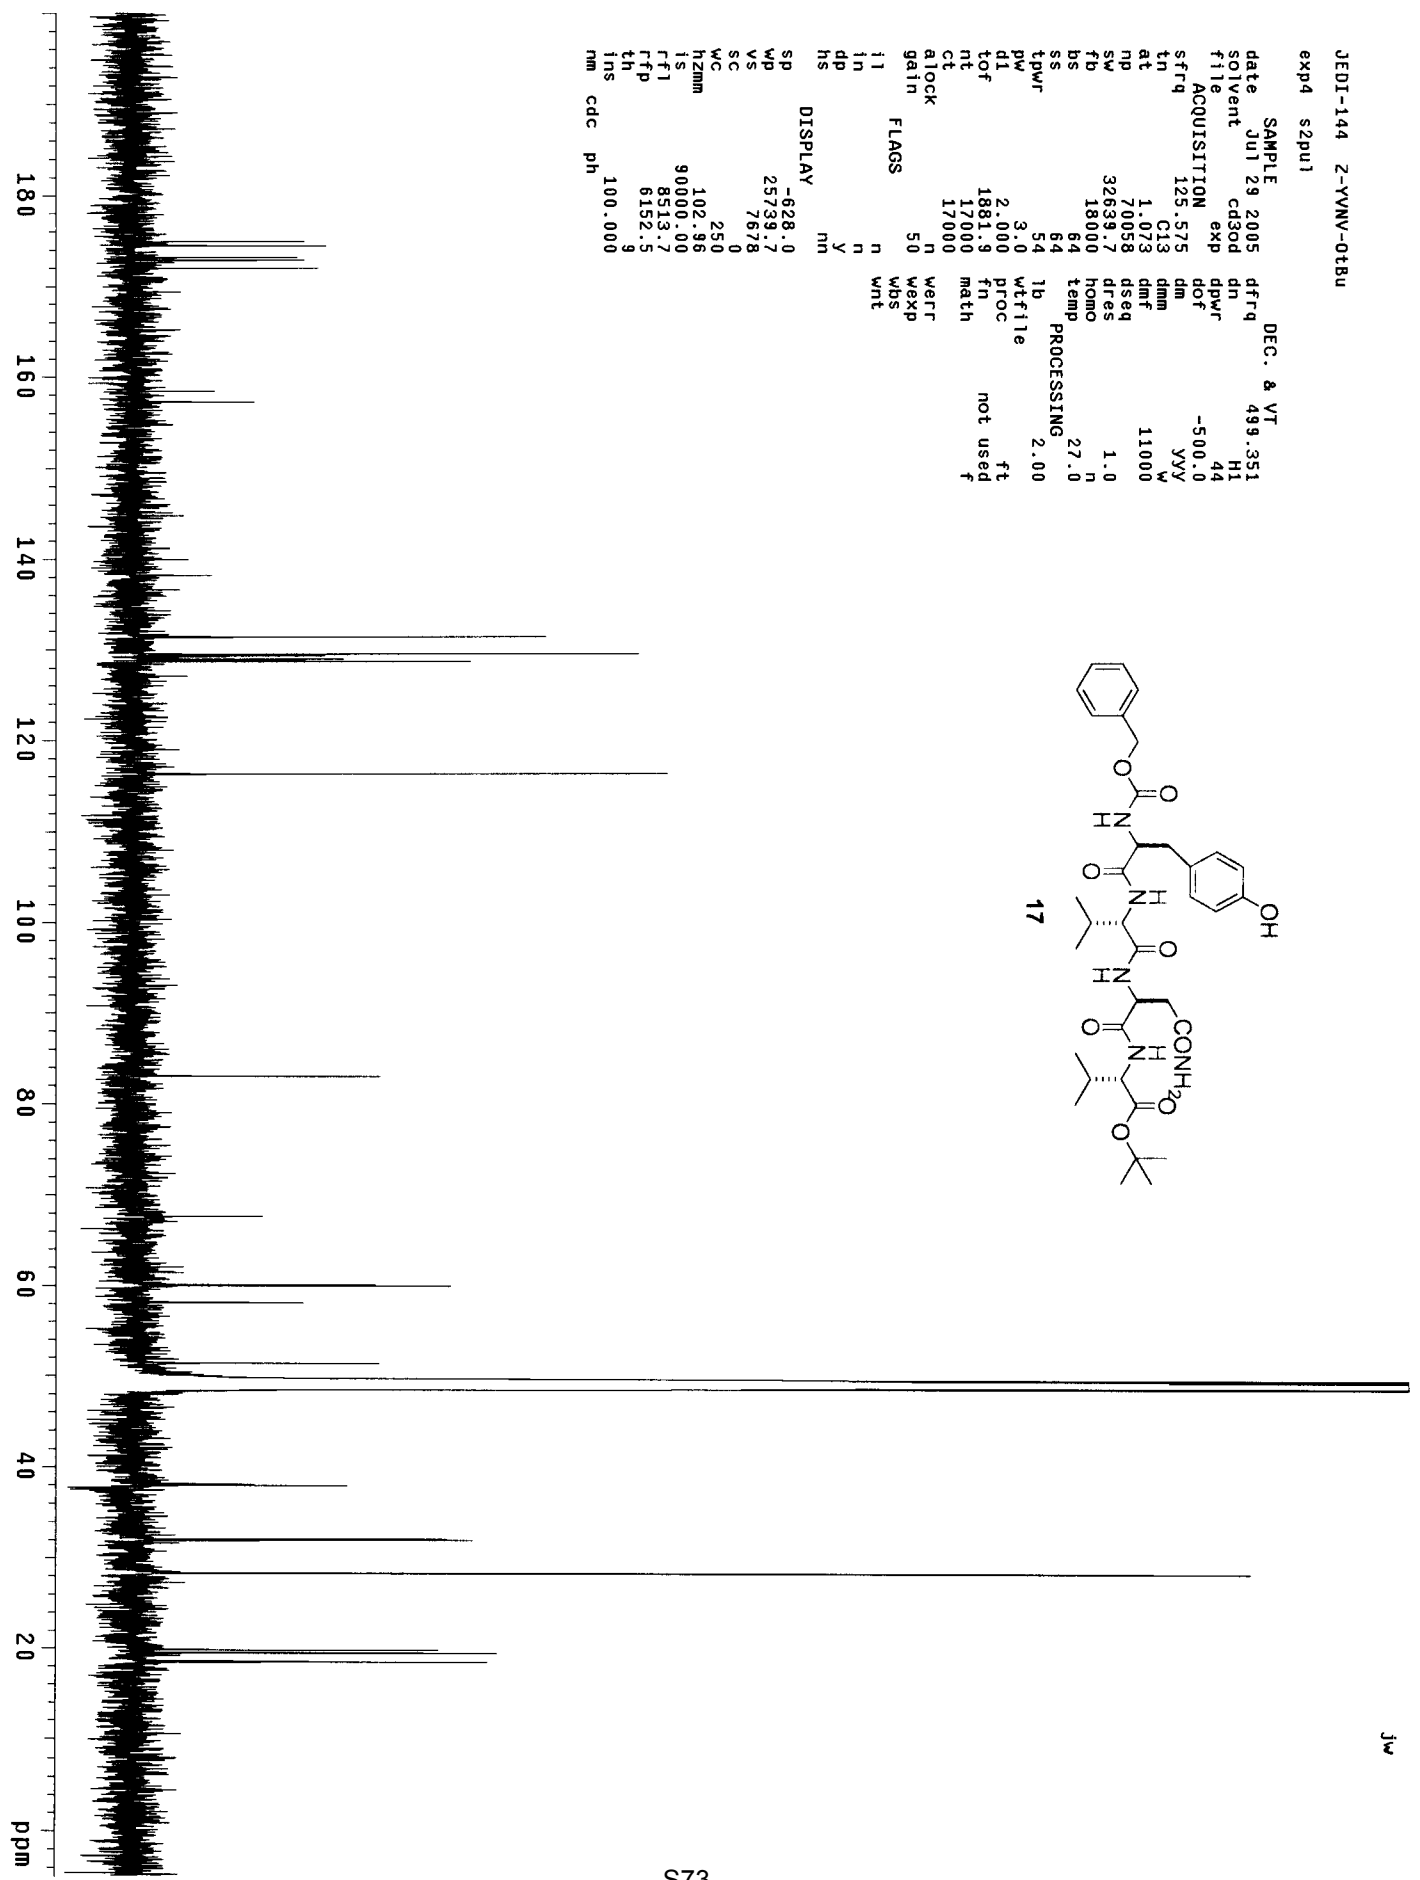

Archive directory:  
 Sample directory:  
 Pulse Sequence: s2pu1  
 Solvent: cd3od  
 Ambient temperature  
 File: jed7-39\_s2pu1\_H1  
 INOVA-500 "nmrastc0"  
 Relax. delay 2.000 sec  
 Pulse 30.0 degrees  
 Acq. time 4.000 sec  
 Width 6410.3 Hz  
 16 repetitions  
 OBSERVE H1 399.8062840 MHz  
 DATA PROCESSING  
 Line broadening 0.1 Hz  
 FT size 65536  
 Total time 1 min, 48 sec

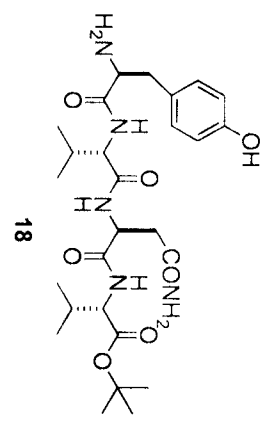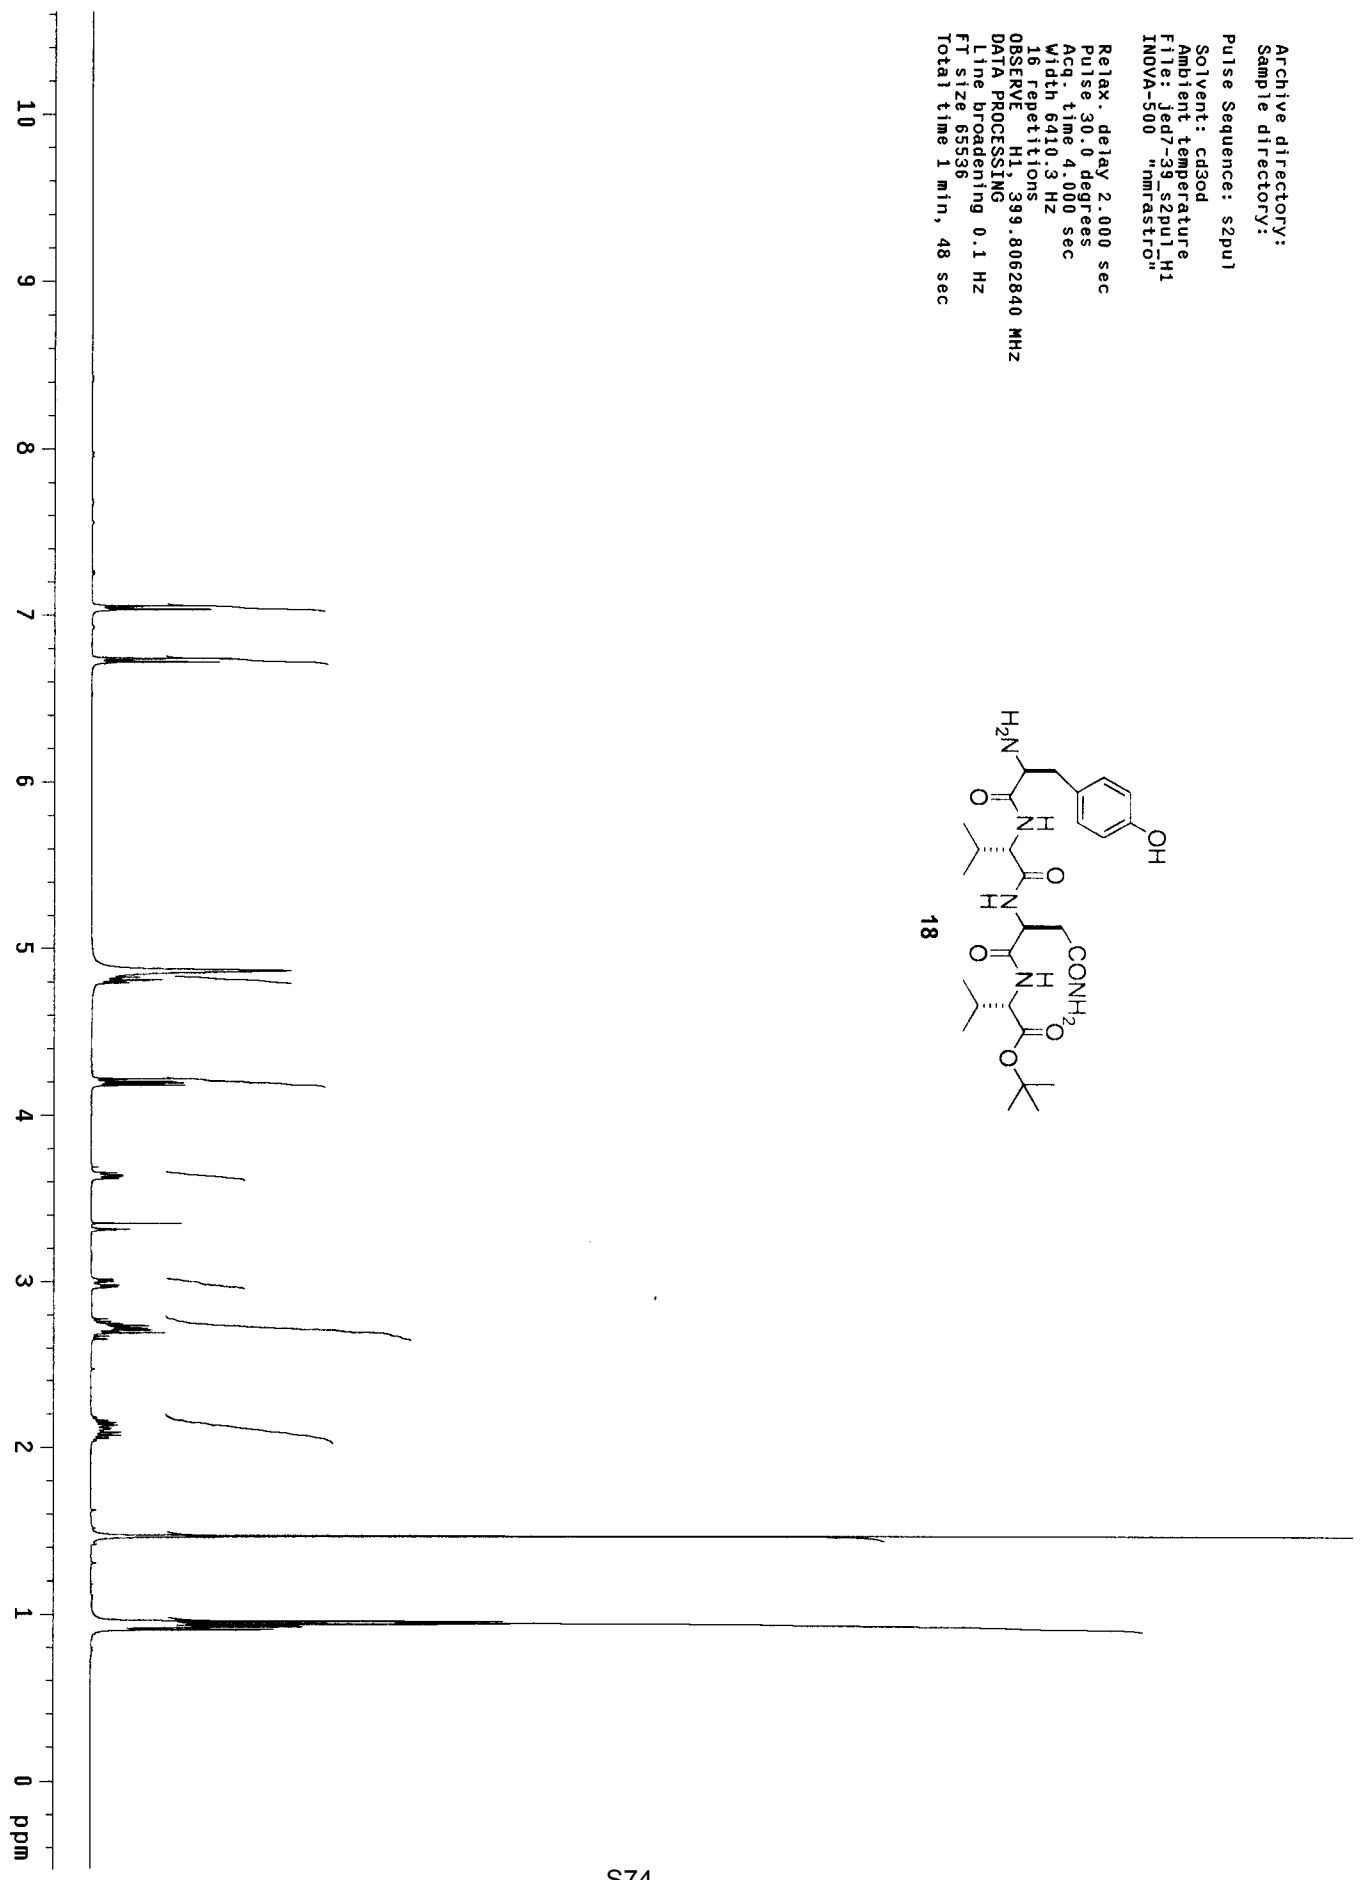

Archive directory:  
Sample directory:  
Pulse Sequence: szpu1  
Solvent: cd3od  
Ambient temperature  
User: 1-14-87  
File: jed7-39\_s2pu1\_C13  
INOVA-500 "mrastrco"  
Relax. delay 2.000 sec  
Pulse 30.0 degrees  
Acq. time 1.300 sec  
Width 24509.8 Hz  
256 Repetitions  
OBSERVE C13, 100.5312328 MHz  
DECUPLE H1, 399.8082857 MHz  
Power 44 db  
continuously on  
WALTZ-16 modulated  
DATA PROCESSING  
Line broadening 2.0 Hz  
FT size 65536  
Total time 14 min, 7 sec

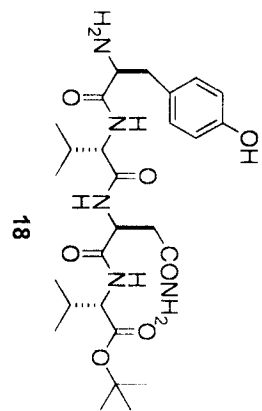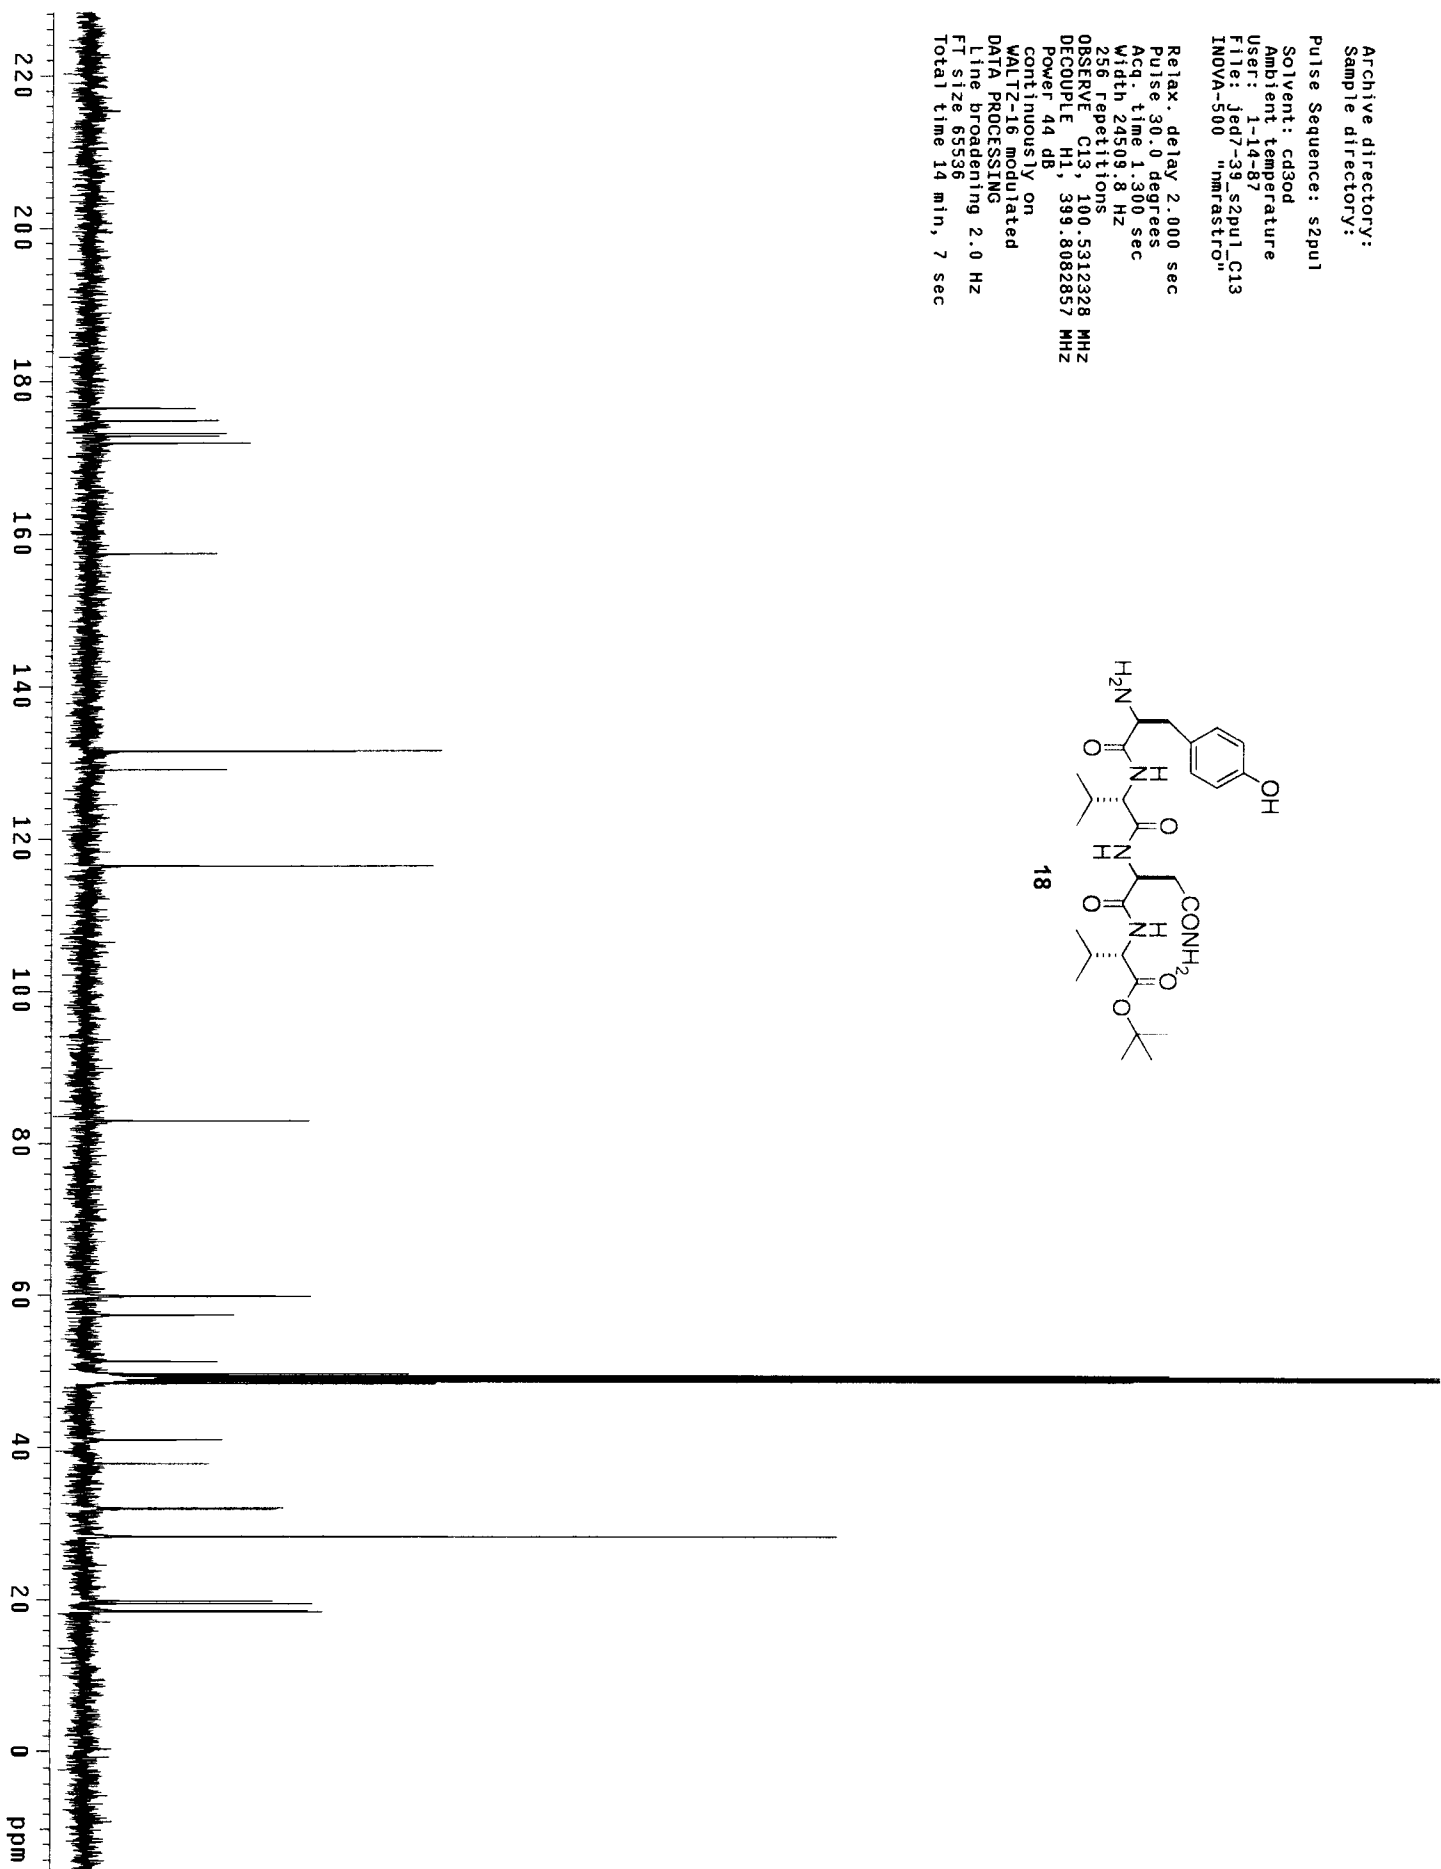

JFDI-282  
jedt282\_h1  
exp1 s2pu1

SAMPLE DEC. & VT  
date Jan 13 2006 dfreq 499.13  
solvent DMSO dn  
file exp dpwr 32  
ACQUISITION exp 0  
sfreq 499.870 dm  
tn h1 dnm mm  
at 3.996 dmf 20.0  
np 73980 dseq  
sw 9256.0 dres 1.0  
fb not used homo n  
bs 32 temp 27.0  
tpwr 57 PROCESSING  
pw 2.0 lb 0.10  
di 2.000 wfile  
tof 1124.6 proc ft  
nt 64 fn not used  
ct 64 math f  
aLOCK n  
gain 30 werr  
fl n wexp  
in n wds  
dp y wnt  
hs nm  
DISPLAY  
sp -250.0  
wp 6248.3  
vs 578  
sc 0  
wc 250  
hzmm 24.99  
ls 1438.12  
fsl 2256.5  
rfp 1244.7  
th 4  
ins 1.000  
ai ph

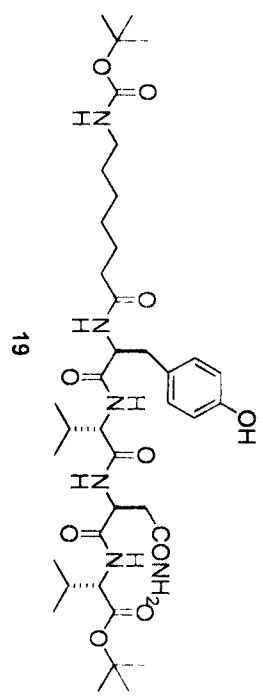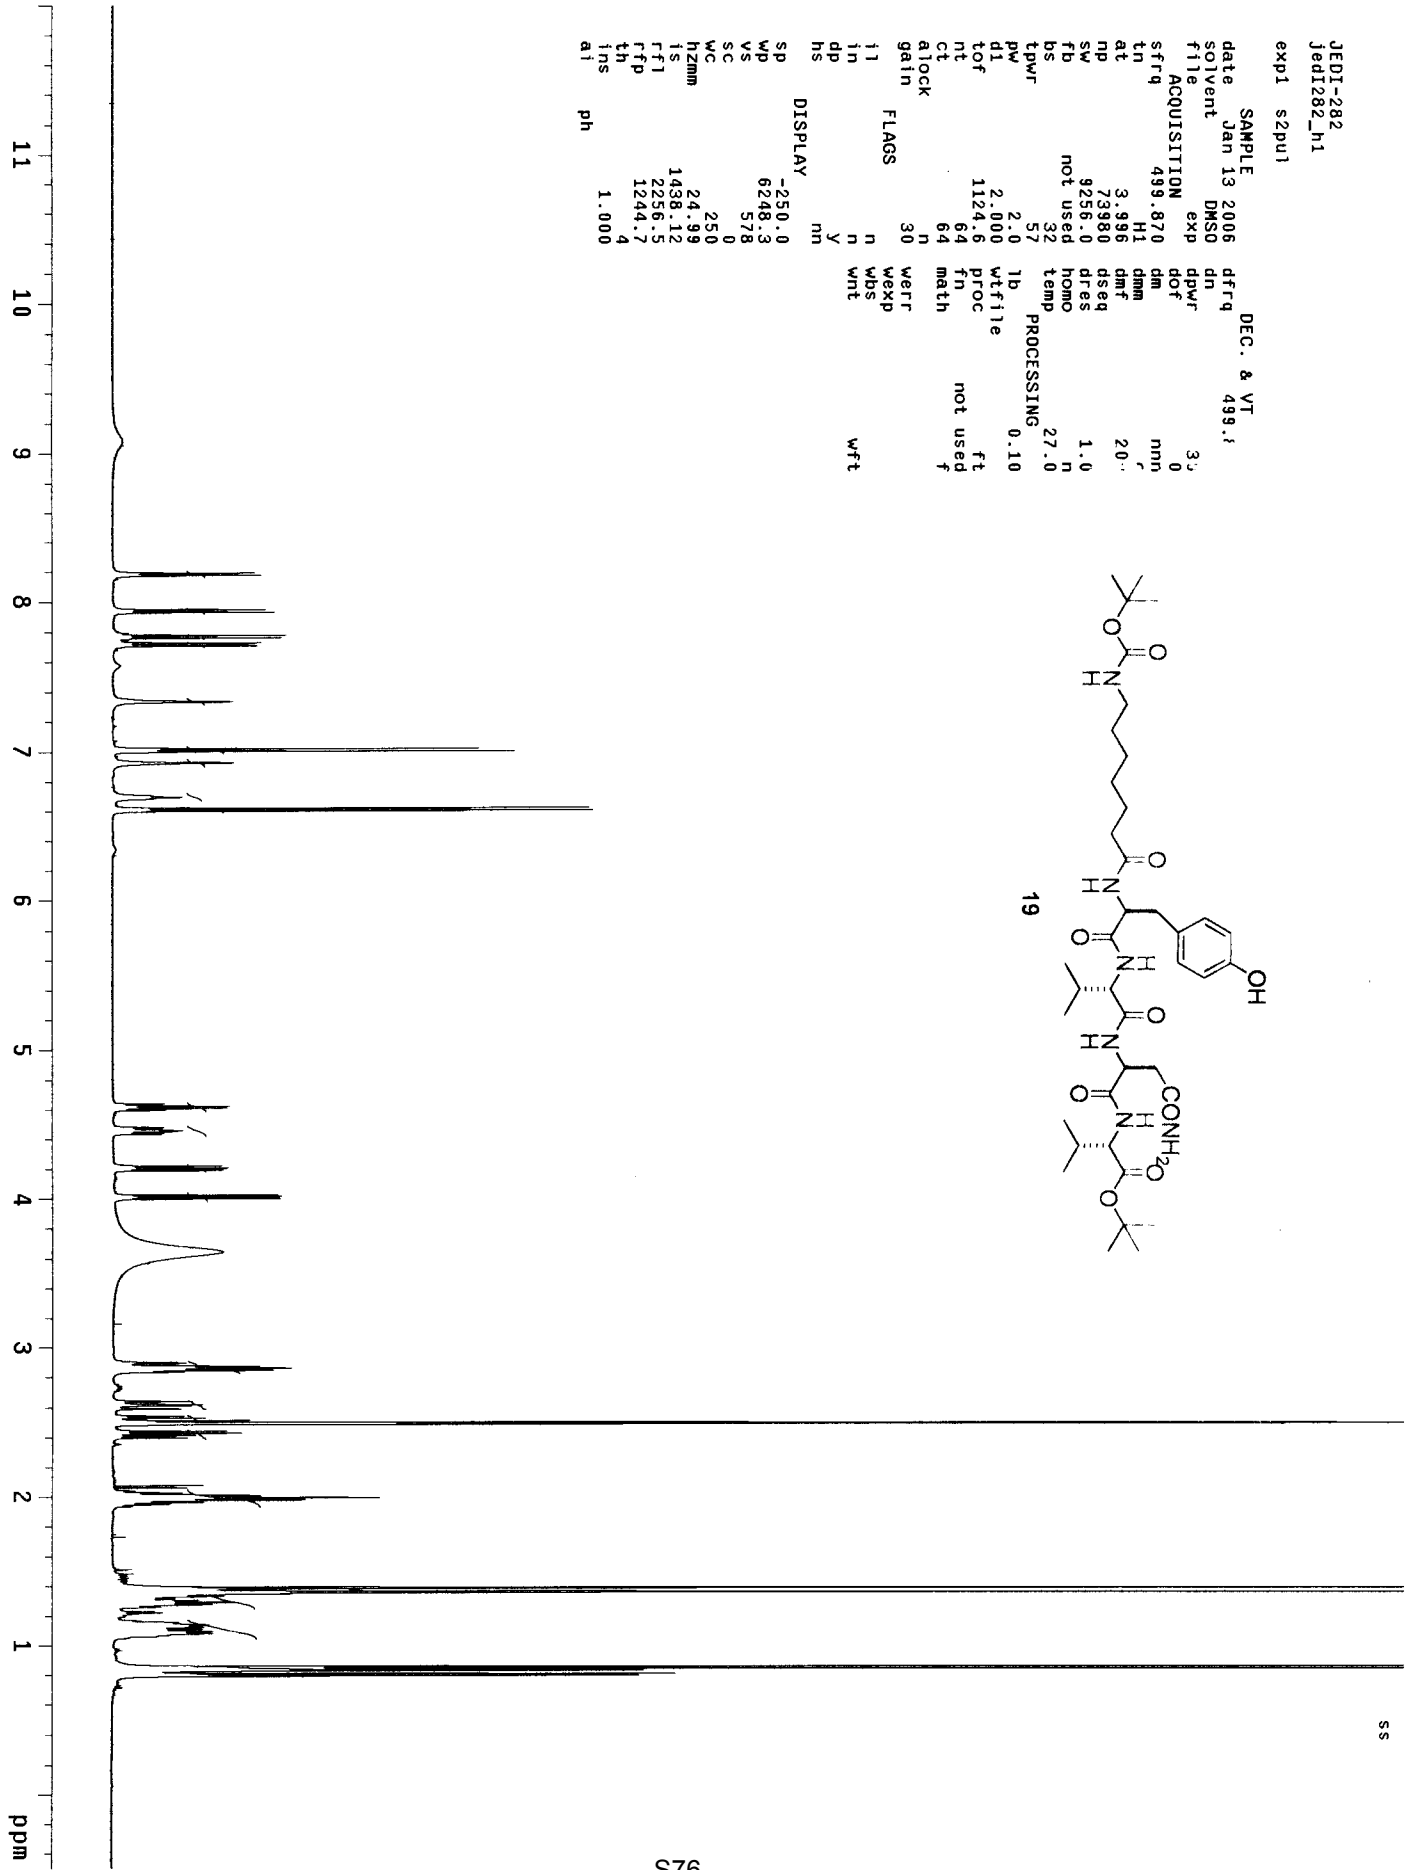

JEDI-282  
 jedi282\_c13  
 exp4 s2pu1

|             |          |             |           |         |
|-------------|----------|-------------|-----------|---------|
| SAMPLE      | date     | Jan 13 2006 | DEC. & VT | 499.869 |
| solvent     | DMSO     |             |           |         |
| file        | exp      | H1          |           |         |
| ACQUISITION | exp      | 37          |           |         |
| sfreq       | 125.706  | dm          |           |         |
| ln          | C13      | dm          |           |         |
| at          | 1.279    | dmf         |           |         |
| np          | 85262    | dseq        |           |         |
| sw          | 3333.3   | dres        |           |         |
| fb          | not used | homo        |           |         |
| bs          | 64       | temp        |           |         |
| tpwr        | 53       | PROCESSING  |           |         |
| pw          | 3.0      | lb          |           |         |
| dt          | 2.000    | wtfile      |           |         |
| tof         | 2198.1   | proc        |           |         |
| nt          | 2000     | fn          |           |         |
| ct          | 20000    | math        |           |         |
| alock       | n        |             |           |         |
| gain        | 60       | werr        |           |         |
| fl          | n        | wexp        |           |         |
| in          | n        | wbs         |           |         |
| dp          | y        | wrt         |           |         |
| hs          | mn       |             |           |         |

  

|         |          |
|---------|----------|
| DISPLAY | -628.5   |
| sp      | 257766.5 |
| wp      | 3486     |
| vs      | 0        |
| sc      | 0        |
| wc      | 250      |
| h2mm    | 103.07   |
| ls      | 500.00   |
| rs      | 7585.7   |
| rfl     | 4964.8   |
| th      | 3        |
| ins     | 100.000  |
| ai      | cdc      |
| ph      |          |

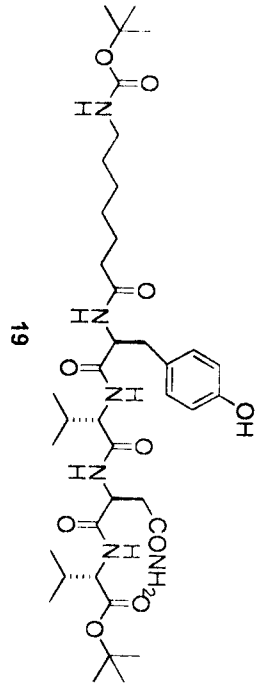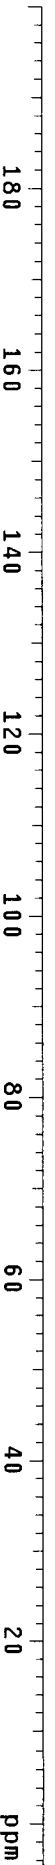

JEDVII(45)

Pulse Sequence: s2pu1  
Solvent: cd3od  
Ambient temperature  
Mercury-400BB "nmr8"

Relax. delay 2.000 sec  
Pulse: 16.4 degrees  
Acq. time 2.856 sec  
Width 5602.2 Hz  
24 repetitions  
OBSERVE H1, 400.268529 MHz  
DATA PROCESSING  
Line broadening 0.1 Hz  
FT size 32768  
Total time 0 min, 0 sec

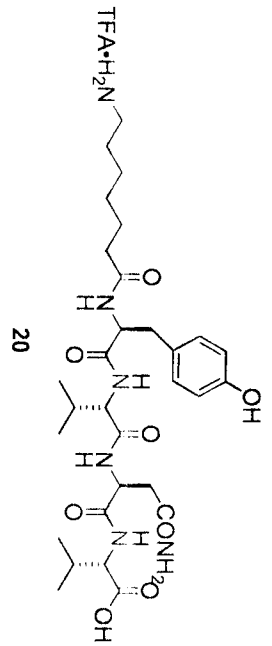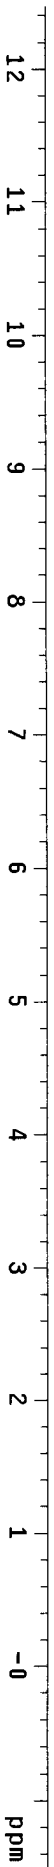

C13

exp4 Carbon

|         |             |             |       |            |
|---------|-------------|-------------|-------|------------|
| SAMPLE  | date        | Apr 22 2010 | temp  | 27.0       |
| solvent | cd3od       | exp         | gain  | 50         |
| file    | ACQUISITION | sw          | spin  | 20         |
|         |             | at          | hst   | 0.008      |
|         |             | np          | pw90  | 15.500     |
|         |             | fb          | alpha | 10.000     |
|         |             | bs          | 11    | n          |
|         |             | ss          | 128   | n          |
|         |             | dl          | 64    | Y          |
|         |             | nt          | 2.000 | hs         |
|         |             | ct          | 5000  | mn         |
|         |             |             | 2132  | PROCESSING |
|         |             |             |       | 1.00       |
|         |             |             |       | not used   |
|         |             |             |       | DISPLAY    |
|         |             |             |       | -628.3     |
|         |             |             |       | 25742.4    |
|         |             |             |       | 7891.8     |
|         |             |             |       | 6153.1     |
|         |             |             |       | -93.1      |
|         |             |             |       | -217.0     |
|         |             |             |       | PLOT       |
|         |             |             |       | 250        |
|         |             |             |       | 0          |
|         |             |             |       | 0          |
|         |             |             |       | 24612      |
|         |             |             |       | 17         |
|         |             |             |       | ai         |
|         |             |             |       | cdc        |
|         |             |             |       | ph         |

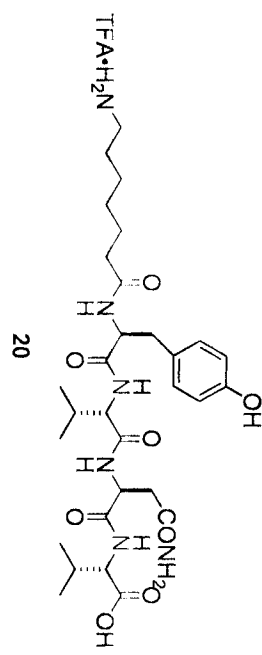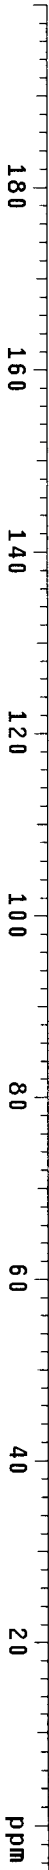

JEDI-287

exp1 s2pu1

SAMPLE 9 2005  
 date Nov 9 2005  
 solvent cd3od  
 file exp  
 ACQUISITION  
 sfreq 499.351  
 tn H1  
 at 4.865  
 np 64316  
 sw 6609.9  
 fb 4000  
 bs 32  
 ss 4  
 tpwr 54  
 pw 2.00  
 d1 2.000  
 tof 59.8  
 nt 64  
 ct 64  
 alock n  
 gain 40  
 flags n  
 il n  
 in y  
 dp y  
 hs nm

DEC. & VT 499.351  
 dfrq 499.351  
 dn 381  
 dpwr 0  
 dof 0  
 dmm nmh  
 dmf c  
 dseq 203  
 dres 1.0  
 homo n  
 temp 27.0  
 PROCESSING 0.10  
 lb wft  
 wftile ft  
 proc not used  
 fn f  
 math f  
 werr n  
 wexp n  
 wbs n  
 wnt

DISPLAY -249.8  
 sp 5243.0  
 wp 2200  
 vs 0  
 sc 250  
 wc hzmm 209.97  
 is 12992.20  
 rffl 2409.0  
 th 1647.9  
 ins 5  
 at cdc ph 2.000

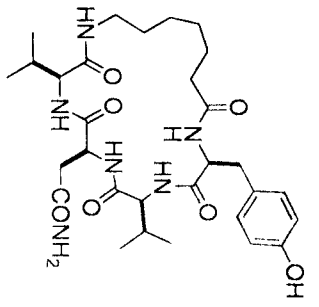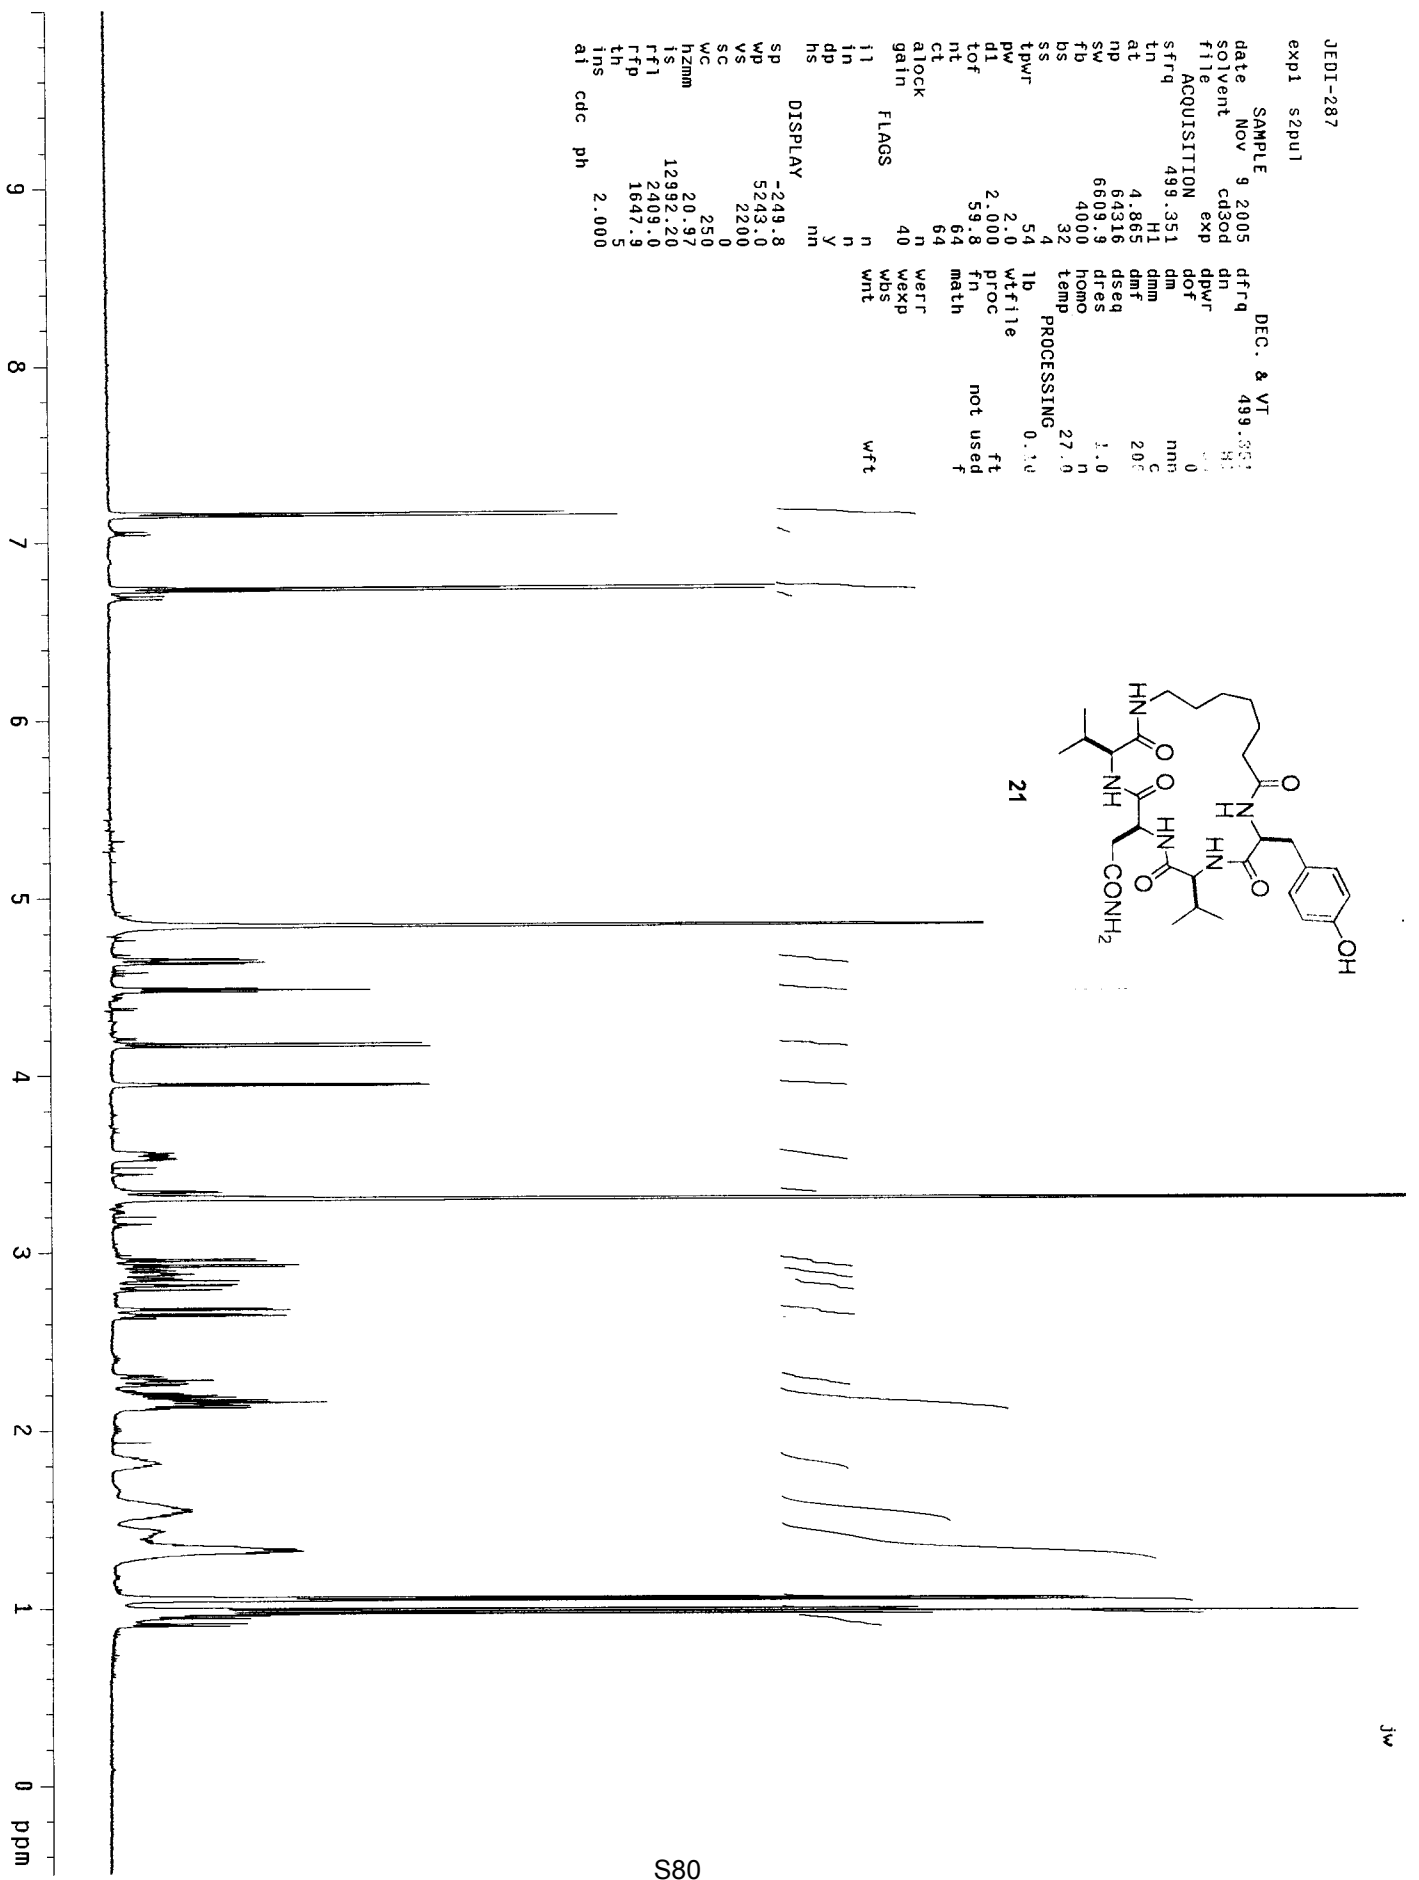



exp4 s2put1

SAMPLE DEC. & VT 499.351  
 date Nov 8 2005 dfrq H1  
 solvent cd3od dn H1  
 file /export/home/~ space/data/jedi\_28~ dpwr 44  
 7\_C13BD.F1d dof -500.0  
 ACQUISITION dnm YYY  
 sfrq 125.575 dmh W  
 tn C13 dmf 11000  
 at 1.073 dseq 1.0  
 np 70058 dres n  
 sw 32539.7 temp 27.0  
 fb 18000 PROCESSING 2.00  
 bs 64 lb Wflite  
 ss 64 Wflite ft  
 tpwr 54 proc not used f  
 pw 3.0 fn math  
 dl 2.000 tof 1881.9  
 nt 16000 weff  
 ct 16000 wexp  
 atlock n WBS  
 gain 50 WRT

FLAGS n n  
 i1 n  
 in n  
 dp Y  
 hs nm

DISPLAY -628.0  
 SP WP 25739.7  
 VS 7798  
 WC 250  
 SC 0  
 hzmm 102.96  
 is 90000.00  
 rfl 8513.7  
 rfp 6152.5  
 th 10  
 rms 100.000  
 cdc ph

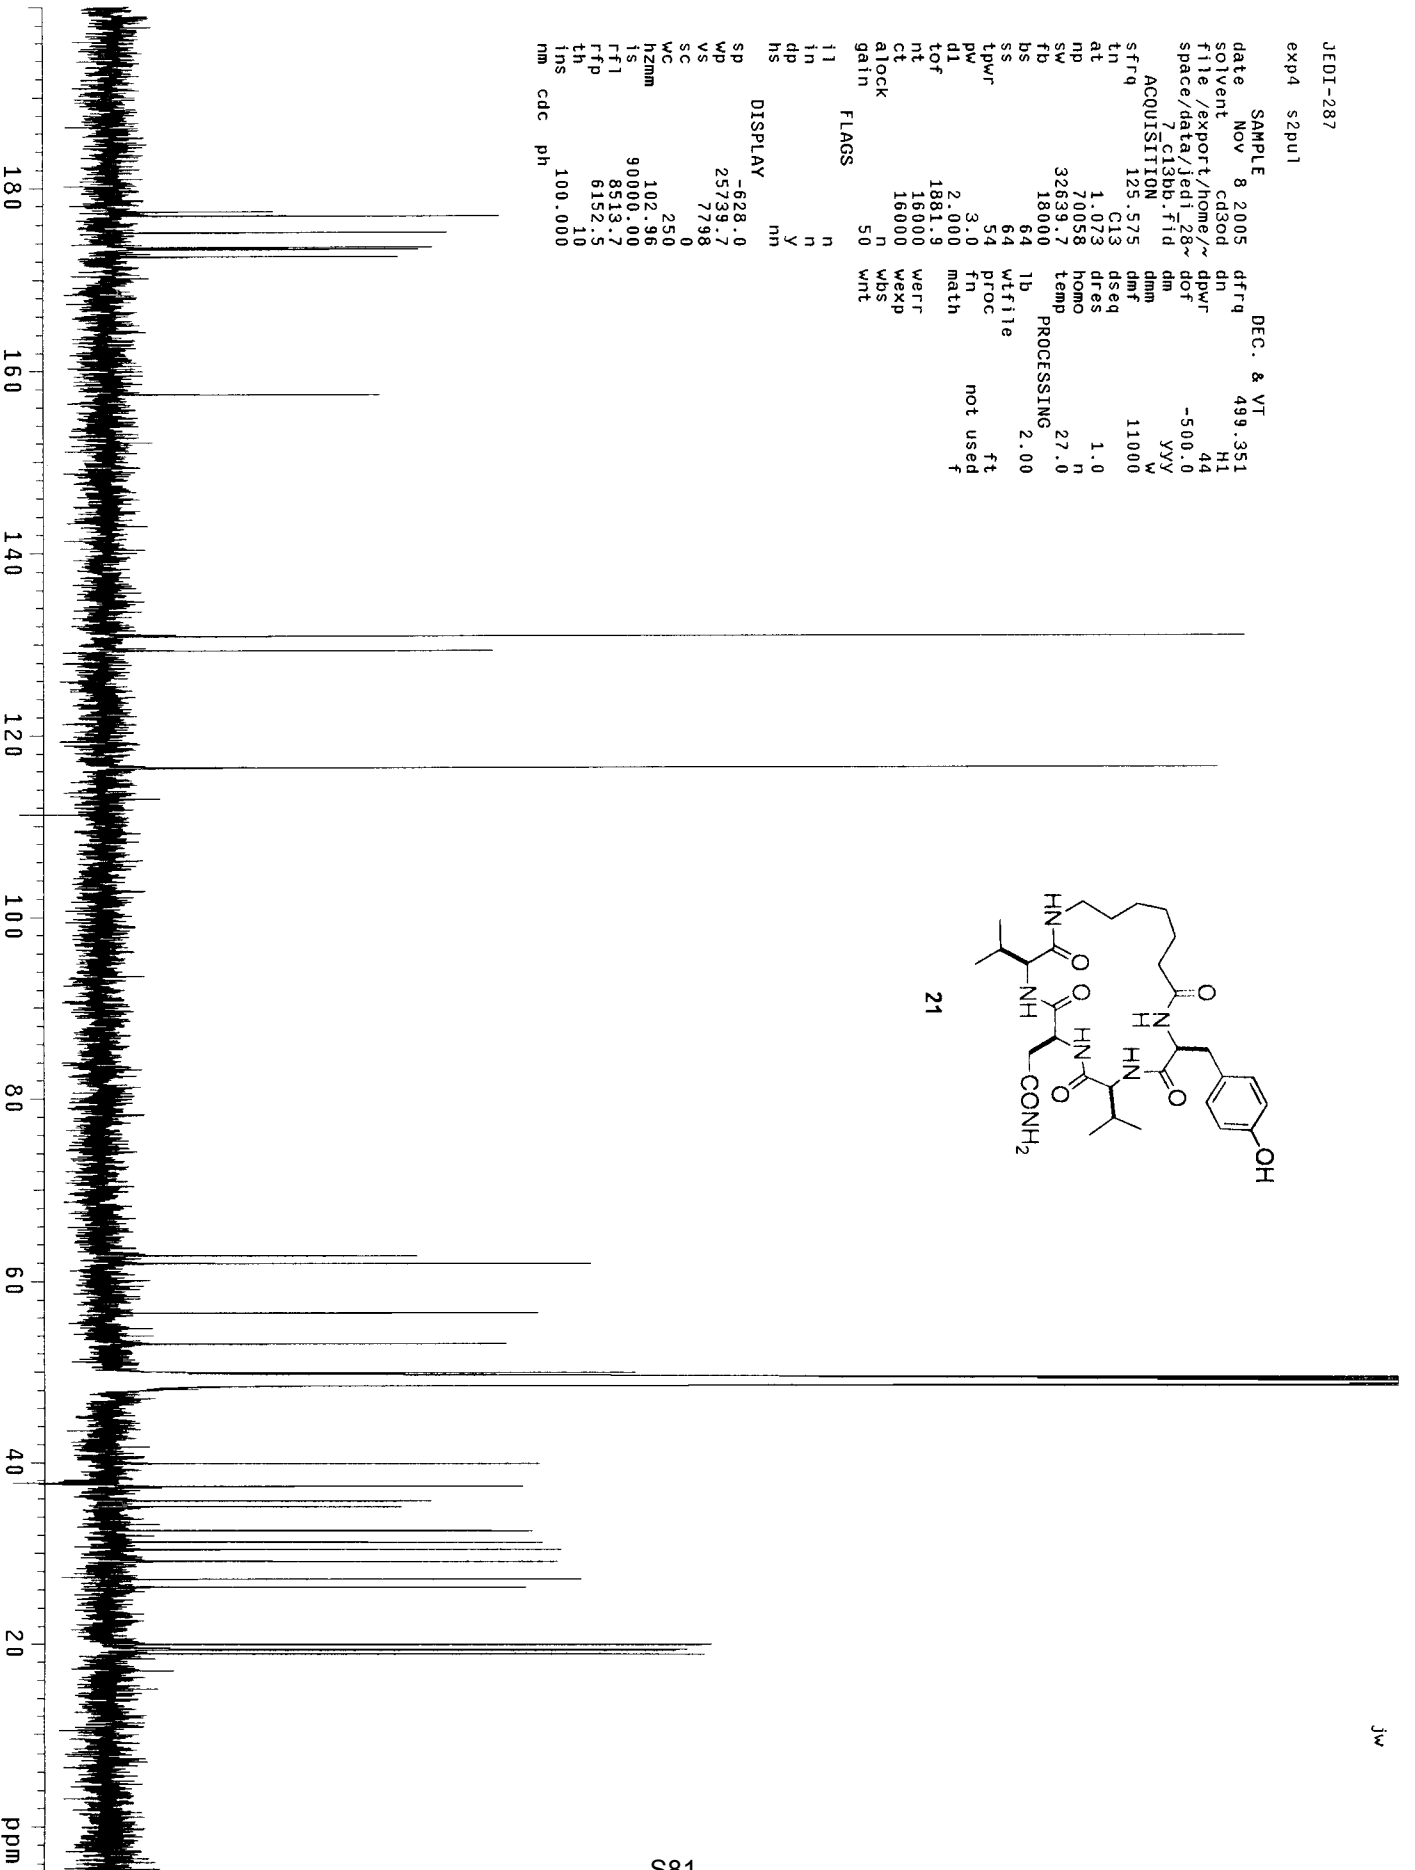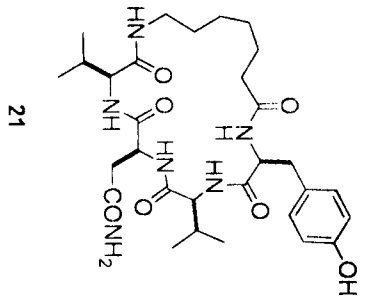

John  
Martin  
JEDI-296  
jed1296\_h1

exp1 presat

|             |             |            |            |          |
|-------------|-------------|------------|------------|----------|
| SAMPLE      | Nov 14 2005 | SSPUL      | SATURATION | n        |
| date        | Nov 14 2005 | satpwr     |            | -12      |
| solvent     | cd3od       | satfrq     |            | -70.4    |
| file        | exp         | satdly     |            | 2.000    |
| ACQUISITION | exp         | satmode    |            | Ynm      |
| sfrq        | 499.870     | composite  |            | n        |
| ln          | H1          | DEC. & VT  |            | n        |
| at          | 3.996       | dn         |            | H1       |
| np          | 73980       | dof        |            | -70.4    |
| sw          | 9256.0      | dm         |            | nm       |
| fb          | 5000        | dmm        |            | c        |
| bs          | 32          | dmf        |            | 200      |
| ss          | 2           | dpwr       |            | 30       |
| tpwr        | 57          | temp       |            | 27.0     |
| pw          | 2.0         | PROCESsing |            | 0.10     |
| dl          | 0           | lb         |            | wtfile   |
| tof         | 1124.6      | wtfile     |            | not used |
| nt          | 64          | proc       |            | f        |
| ct          | 64          | fn         |            | f        |
| alock       | n           | math       |            | f        |
| gain        | 30          | weir       |            | n        |
| FLAGS       | n           | wexp       |            | n        |
| il          | n           | wbs        |            | Y        |
| in          | n           | wnt        |            | nm       |
| dp          | Y           | DISPLAY    |            | wft      |
| hs          | nm          | SP         |            | -250.1   |
|             |             | WP         |            | 5248.5   |
|             |             | VS         |            | 1833     |
|             |             | SC         |            | 0        |
|             |             | WC         |            | 250      |
|             |             | hZmm       |            | 20.99    |
|             |             | IS         |            | 7940.43  |
|             |             | rfl        |            | 2667.2   |
|             |             | rfp        |            | 1649.6   |
|             |             | th         |            | 3        |
|             |             | ins        |            | 1.000    |
|             |             | ai         |            | 1.000    |
|             |             | ph         |            |          |

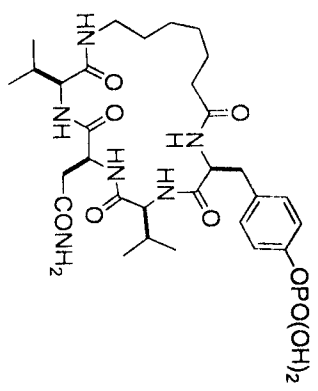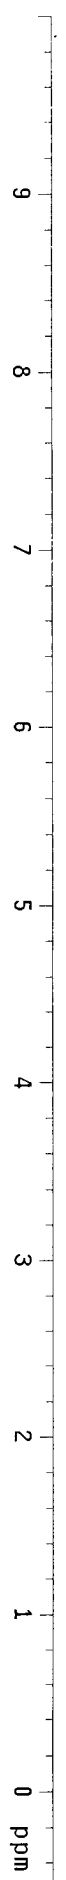

John  
Martin  
JE01-296  
jedt296\_c13

exp4 s2pu1

SAMPLE DEC. & VT

date Nov 14 2005 dfrq 499.869

solvent cd3od dn H1

file exp dpwr 37

ACQUISITION 125.706 dm 0

sfreq 125.706 dm 0

tn C13 dm 10582

dt 1.279 dmf

np 85262 dseq 1.0

sw 33333.3 dres 1.0

fb not used homo 27.0

bs not used temp

tpwr 53 PROCESSING 1.00

pw 3.0 lb

d1 2.000 wfile

tof 2198.1 proc ft

nt 10000 fn not used

ct 10000 math f

alock n

gatin 60 werr

in n wexp

dp n wbs

hs y wnt

DISPLAY

sp -628.7

wp 257266.5

vs 15573

sc 0

wc 250

h2mm 103.07

is 500.00

rfl 8538.8

rflp 6158.9

th 1

ins 100.000

ai cdc ph

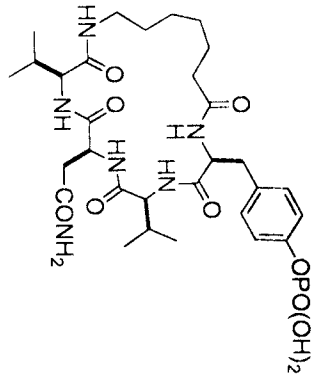

2

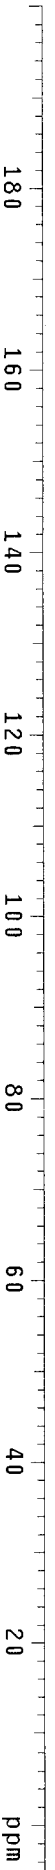

JEDI1-161  
JEDI161\_H1

exp1 presat

SAMPLE date Jul 20 2006  
solvent cd3od  
file ACQUISITION exp

sfrq 499.970  
tn H1  
at 3.996  
np 73980  
sw 9255.0  
fb 5000  
bs 32  
ss 57  
tpwr 2.0  
pw 0  
di 1124.6  
tof 64  
nt 64  
ct n  
atlock n  
gain 30

dn H1  
dof -70.7  
dm mm  
dmm C  
dmf 200  
dpwr 30  
temp 27.0  
PROCESSING 0.10  
lb wtfile  
wf 64  
proc 64  
fn n  
math not used  
f

ll n Weff  
in n Wexp  
dp y wbs  
hs nn wnt

DISPLAY wft  
SP -250.1  
WD 5248.5  
VS 618  
SC 0  
WC 250  
hzm 20.99  
ts 3368.03  
rf1 2667.8  
th 1649.6  
ins 7  
ai cdc ph 1.000

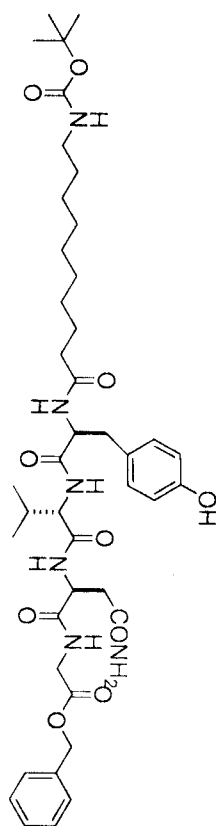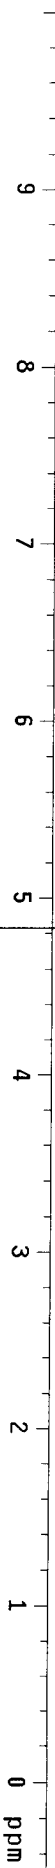

JEDII-161  
jedii161\_c13

exp4 s2pul

|             |             |            |          |
|-------------|-------------|------------|----------|
| date        | Jul 21 2006 | DEC. & VT  | 499.869  |
| solvent     | cd3od       | dn         | H1       |
| file        | exp         | dpwr       | 37       |
| ACQUISITION | exp         | dof        | 0        |
| sfrq        | 125.706     | dm         | YVY      |
| tn          | C13         | dmm        | W        |
| dt          | 1.279       | dmt        | 10582    |
| np          | 85262       | dseq       |          |
| sw          | 3333.3      | dres       | 1.0      |
| fb          | not used    | homo       | n        |
| bs          | 64          | temp       | 27.0     |
| tpwr        | 53          | PROCESSING |          |
| pw          | 3.0         | lb         | 1.00     |
| d1          | 2.000       | wtfile     |          |
| tof         | 2198.1      | proc       | ft       |
| nt          | 10000       | fn         | not used |
| ct          | 6127        | math       | f        |
| alock       | n           |            |          |
| gain        | 60          | werr       |          |
| fl          | FLAGS       | wexp       |          |
| in          | n           | wbs        |          |
| dp          | n           | wnt        |          |
| hs          | y           |            |          |
|             | nm          |            |          |

DISPLAY

|      |         |
|------|---------|
| sp   | -628.7  |
| wp   | 25766.5 |
| vs   | 5517    |
| sc   | 0       |
| wc   | 250     |
| hzmm | 103.07  |
| is   | 500.00  |
| rft1 | 8539.3  |
| rftp | 6158.9  |
| th   | 68      |
| ins  | 100.000 |
| ai   | cdc     |
| ph   |         |

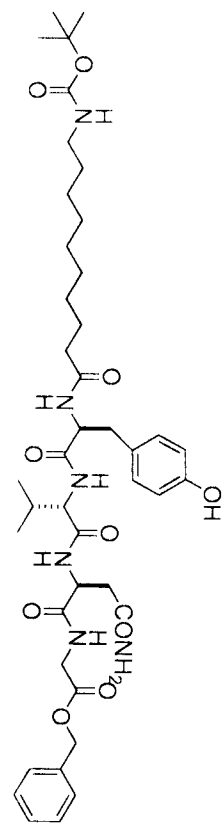

22

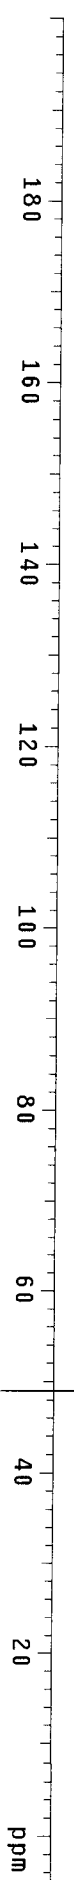

Jeal1196

exp1 presat

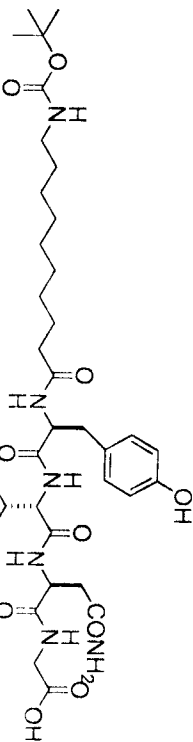

SAMPLE Jul 28 2006  
 solvent cd30d  
 file exp  
 ACQUISITION  
 sfrq 499.870  
 tn H1  
 at 3.996  
 np 73980  
 sw 9256.0  
 fb 5000  
 bs 32  
 ss 2  
 c 200  
 dimf 30  
 dpwr 27.0  
 pw 2.0  
 dt 1124.6  
 tof 0  
 nt 64  
 ct 64  
 alock n  
 gain 30  
 FLAGS  
 i1 n  
 in n  
 dp Y  
 hs mn  
 werr n  
 wexp n  
 wbs Y  
 wnt mn  
 DISPLAY wft  
 SP -250.1  
 WP 5298.5  
 VS 285  
 SC 0  
 WC 250  
 hzmm 20.99  
 IS 3130.23  
 rfl 2567.8  
 rfp 1549.6  
 th 7  
 ins 1.000  
 at cdc ph

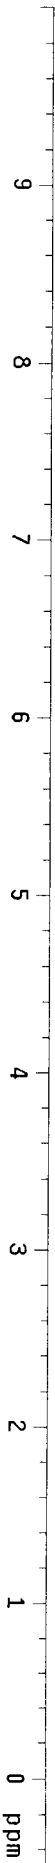

JEDII-196  
jedii196

exp4 szpul1

SAMPLE DEC. & VT  
date Jul 28 2006 dfrq 499.869  
solvent cd30d dn H1  
file exp dpr 37  
ACQUISITION 125.706 dm 0  
sfreq 125.706 dmm YYY  
tn C13 dmf W  
dt 1.279 dmf 10582  
np 85262 dseq  
sw 33333.3 dres 1.0  
fb not used homo n  
bs 64 temp 27.0  
tpwr 53 PROCESSING  
pw 3.0 lb 1.00  
d1 2.000 wfile  
tof 2198.1 proc ft  
nt 20000 fn not used  
ct 5975 math f  
atlock n  
gain 60 weff  
flags n wexp  
i1 n wbs  
in n wnt  
dp y  
hs nm

DISPLAY  
sp -628.7  
wp 25766.5  
vs 6099  
sc 0  
wc 250  
h2mm 103.07  
is 500.00  
rtf1 8539.3  
rtf2 6158.9  
th 68  
ins 100.000  
ai ph

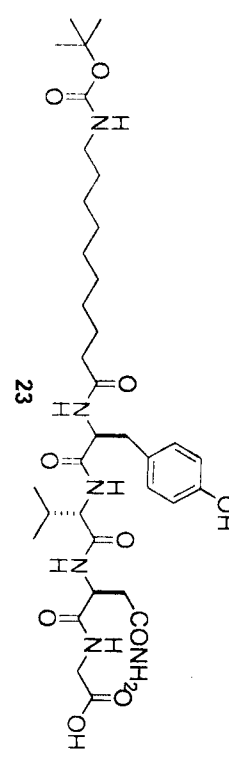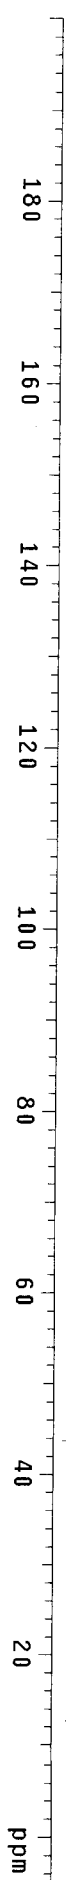

JEDII-278

Pulse Sequence: s2pu1

Solvent: cd3od

Ambient temperature

File: jed2-278

INOVA-500 "nmrastro"

Relax. delay 2.000 sec

Pulse 16.4 degrees

Acq. time 2.856 sec

Width 5602.2 Hz

36 repetitions

OBSERVE H1, 400.2685554 MHz

DATA PROCESSING

Line broadening 0.1 Hz

FT size 32768

Total time 2 min, 55 sec

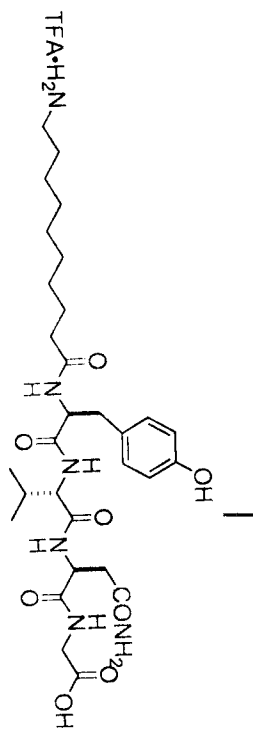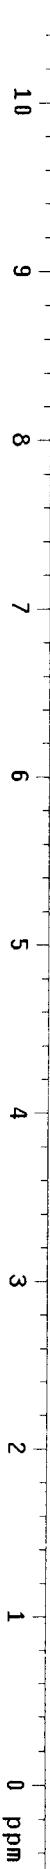



exp4 Carbon

|             |       |             |         |        |            |
|-------------|-------|-------------|---------|--------|------------|
| SAMPLE      | date  | Apr 28 2010 | SPECIAL | temp   | 27.0       |
| SOLVENT     | cd3od |             | gain    | 30     |            |
| FILE        | exp   |             | sp1n    | 20     |            |
| ACQUISITION | sw    | 40322.6     | hst     | 0.008  |            |
|             | at    | 2.000       | pv90    | 7.800  |            |
|             | np    | 161290      | alfa    | 10.000 |            |
|             | fb    | 17000       | FLAGS   |        |            |
|             | bs    | 84          | il      | n      |            |
|             | dl    | 2.000       | in      | n      |            |
|             | nt    | 15000       | dp      | y      |            |
|             | ct    | 14976       | hs      | nh     |            |
| TRANSMITTER | tn    | C13         | tb      | fn     | PROCESSING |
|             | sfq   | 150.824     |         |        | 0.50       |
|             | tof   | 2296.4      |         |        | DISP       |
|             | tpwr  | 58          |         |        | 262144     |
|             |       |             |         |        |            |
| DECOUPLER   | pw    | 2.600       |         |        | DISPLAY    |
|             |       |             |         |        | -754.2     |
|             |       |             |         |        | WD         |
|             |       |             |         |        | 33931.4    |
|             |       |             |         |        | FP         |
|             |       |             |         |        | 10745.8    |
|             |       |             |         |        | FFF        |
|             |       |             |         |        | 211.4      |
|             |       |             |         |        | TP         |
|             |       |             |         |        | 32.3       |
|             |       |             |         |        | PLOT       |
|             |       |             |         |        | WC         |
|             |       |             |         |        | 250        |
|             |       |             |         |        | SC         |
|             |       |             |         |        | VS         |
|             |       |             |         |        | 0          |
|             |       |             |         |        | VS         |
|             |       |             |         |        | 296643     |
|             |       |             |         |        | 7          |
|             |       |             |         |        | at         |
|             |       |             |         |        | cdc        |
|             |       |             |         |        | ph         |

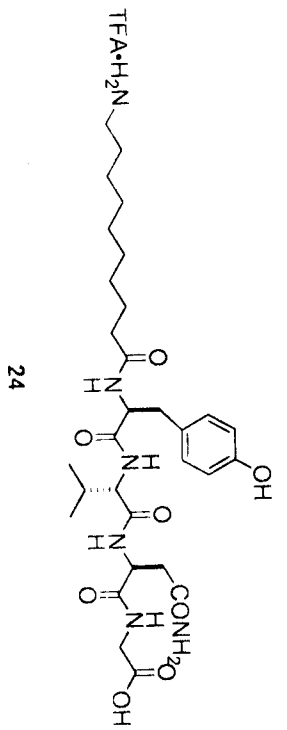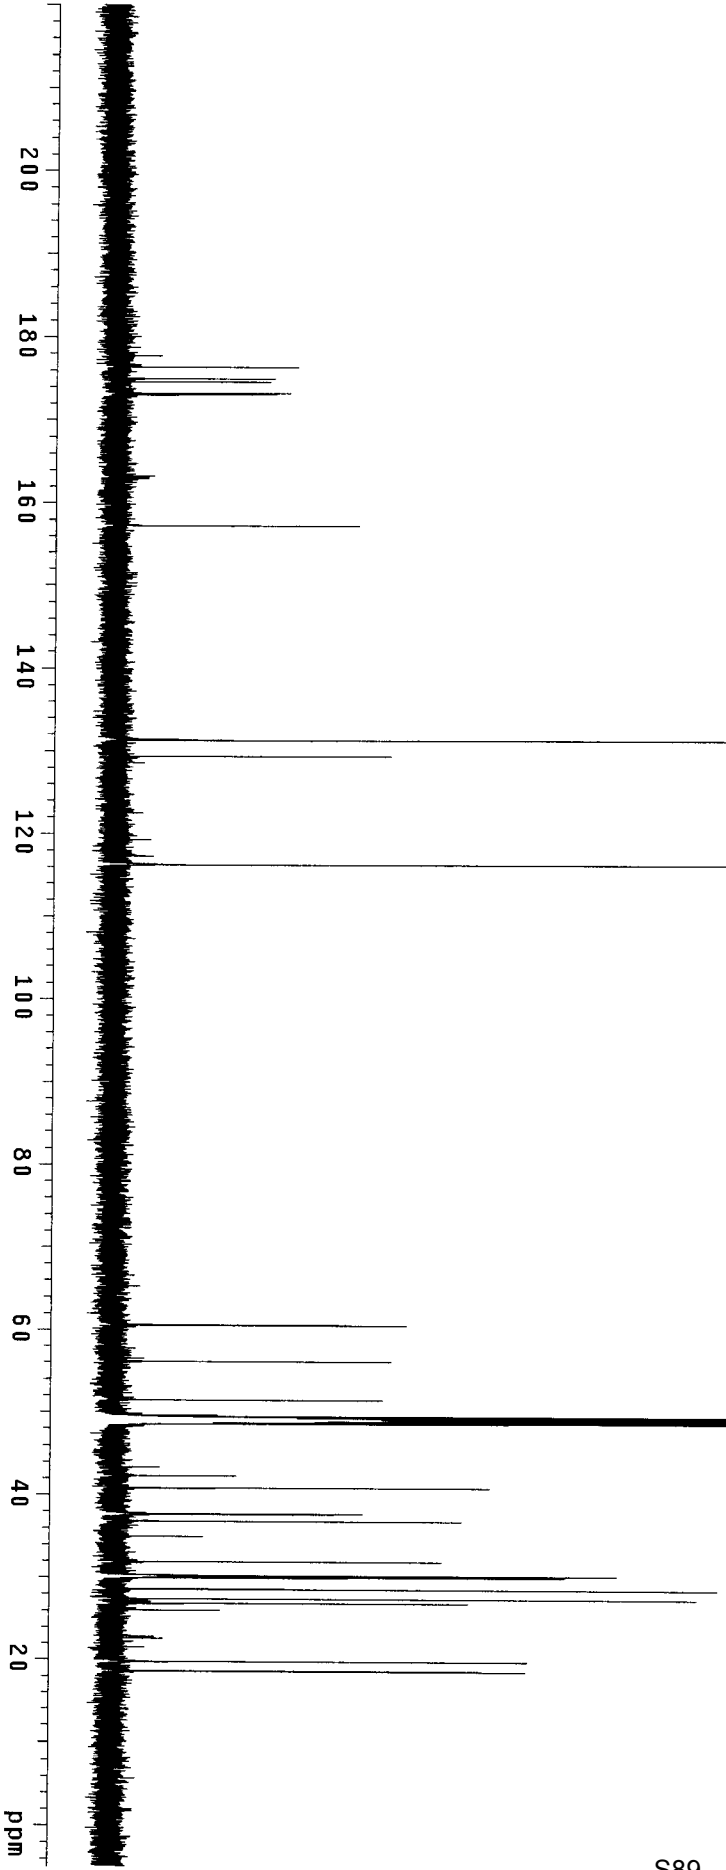

23macpyvng

expi s2pu1

|             |            |            |          |
|-------------|------------|------------|----------|
| date        | Mar 2 2007 | DEC. & VT  | 499.351  |
| solvent     | cd3od      | dn         | H1       |
| file        | exp        | dpwr       | 30       |
| ACQUISITION | exp        | dof        | 0        |
| sfrq        | 499.352    | dm         | nmh      |
| ln          | H1         | dmm        | C        |
| at          | 4.865      | dmf        | 200      |
| np          | 89888      | dseq       | 1.0      |
| sw          | 9237.9     | dres       | 1.0      |
| fb          | 5000       | homo       | n        |
| bs          | 32         | temp       | 27.0     |
| ss          | 4          | PROCESSING | 0.10     |
| tpwr        | 54         | lb         | wfite    |
| pw          | 2.0        | wfite      | ft       |
| dl          | 2.000      | proc       | not used |
| tof         | 1123.4     | fn         | f        |
| nt          | 128        | math       | f        |
| ct          | 128        |            |          |
| alock       | n          | werr       | werr     |
| gain        | 40         | wexp       | wexp     |
| FLAGS       | n          | wds        | wds      |
| ll          | n          | wnt        | wnt      |
| in          | n          |            |          |
| dp          | y          |            |          |
| hs          | nh         |            |          |

DISPLAY -249.7  
 SP WP 5243.1  
 VS 4577.0  
 SC 0  
 WC 250  
 hzmm 20.97  
 IS 17433.12  
 rfl 2659.6  
 rfp 1647.9  
 th 14  
 ins 2.000  
 ai cdc ph

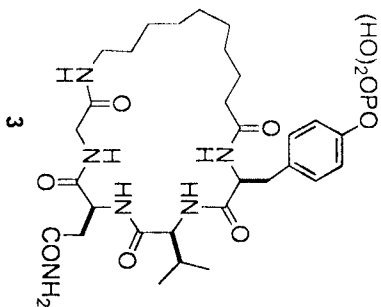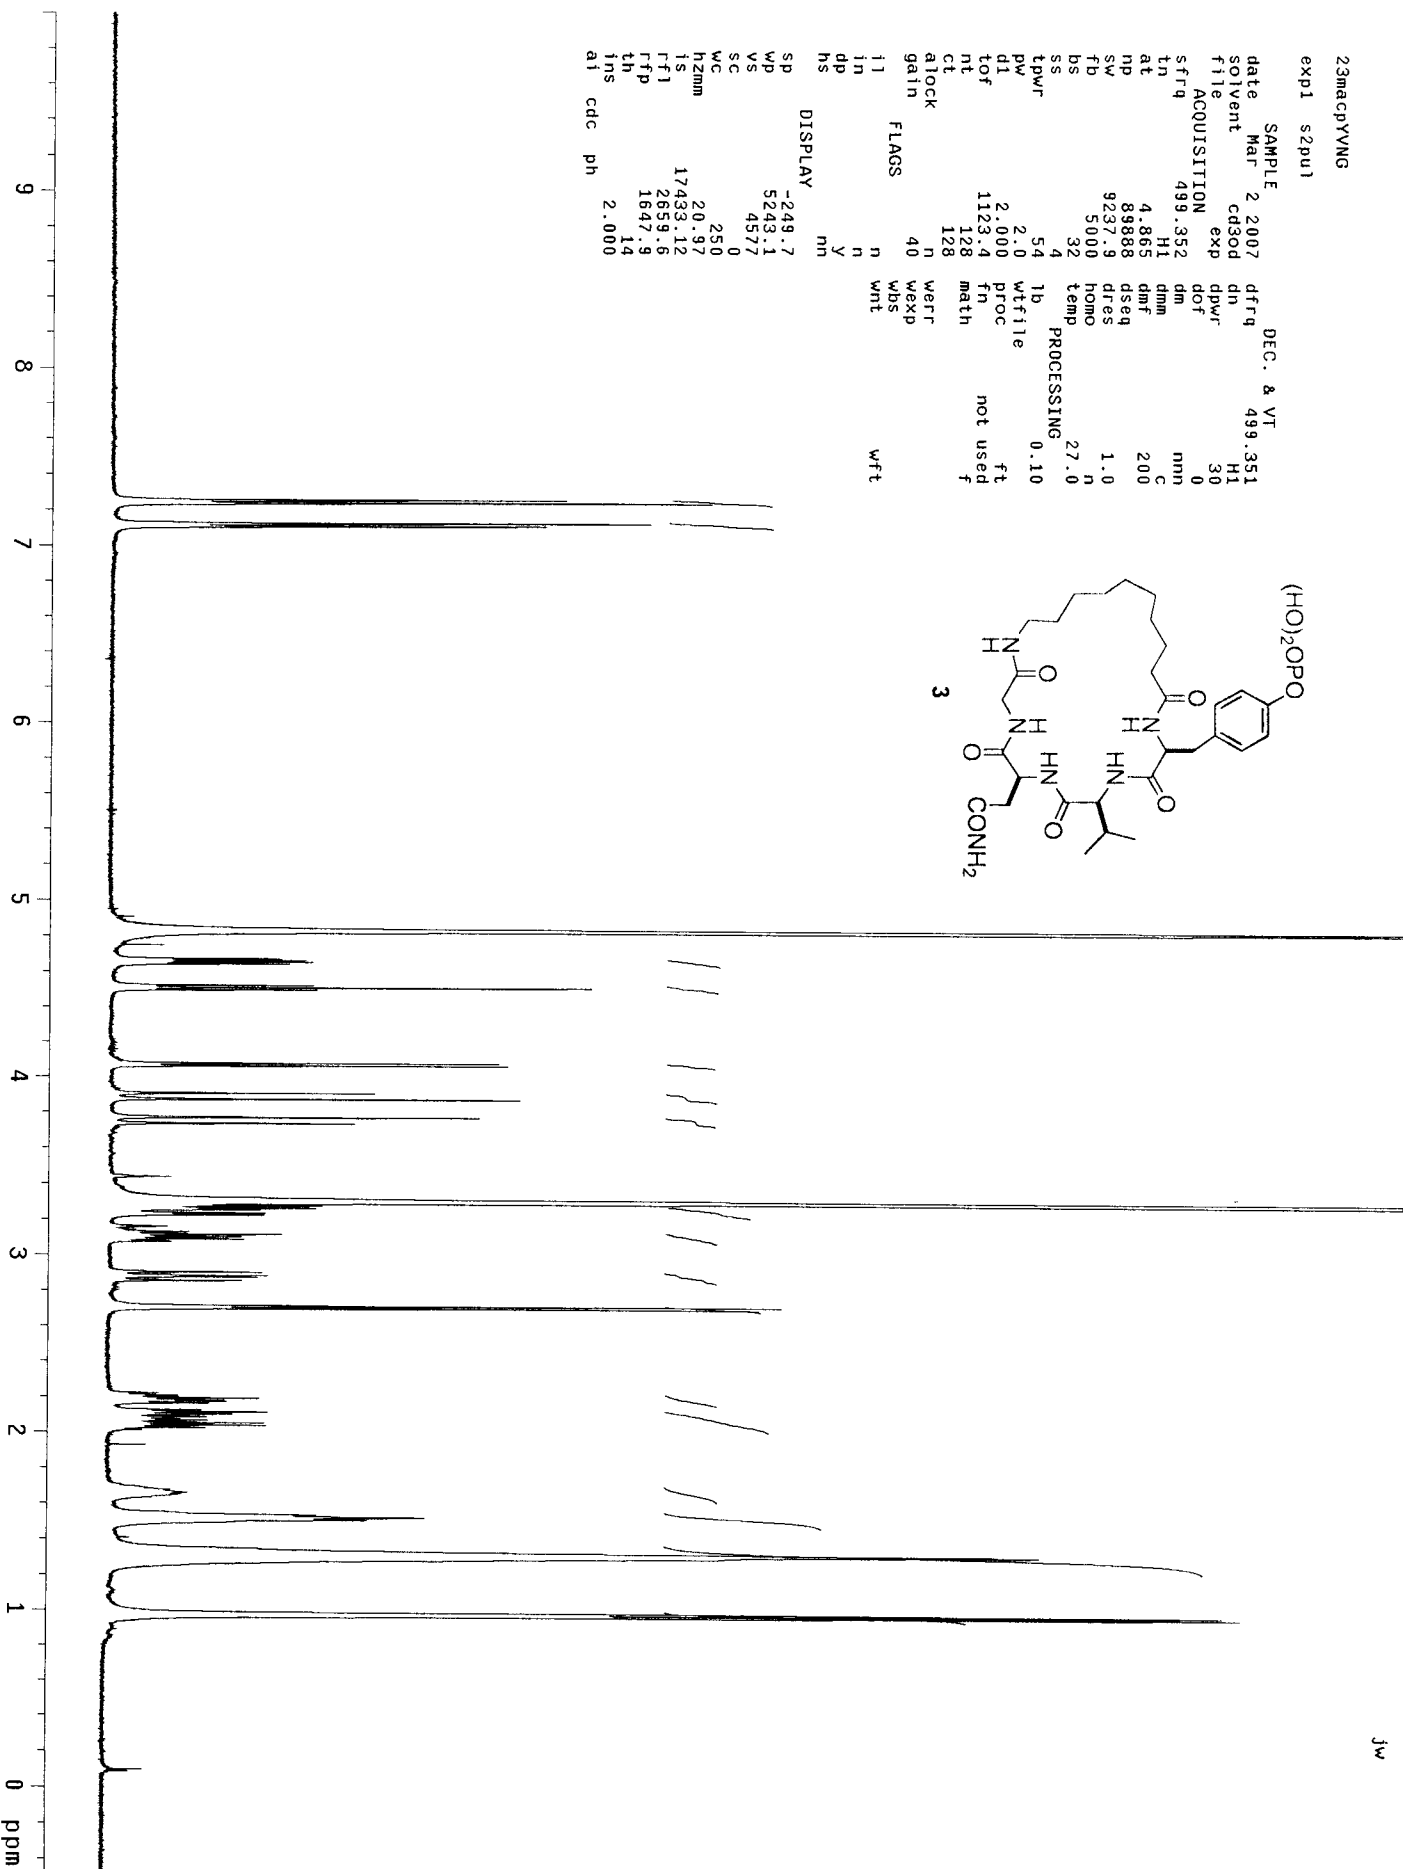

JEDIII-96  
jediii96\_c13

exp4 szpu1

|        |             |             |            |           |          |
|--------|-------------|-------------|------------|-----------|----------|
| SAMPLE | date        | Feb 15 2007 | dfrq       | DEC. & VT | 499.869  |
|        | solvent     | cd3od       | dn         |           | H1       |
|        | file        | exp         | dpwr       |           | 37       |
|        | ACQUISITION |             | dof        |           | 0        |
|        | sfrq        | 125.706     | dm         |           | yyy      |
|        | tn          | C13         | dmm        |           | w        |
|        | at          | 1.278       | dmf        |           | 10582    |
|        | np          | 85262       | dseq       |           |          |
|        | sw          | 33333.3     | dres       |           | 1.0      |
|        | fb          | not used    | homo       |           | n        |
|        | bs          | 64          | temp       |           | 27.0     |
|        | tpwr        | 53          | PROCESSING |           | 1.00     |
|        | pw          | 3.0         | lb         |           | wfite    |
|        | dl          | 2.000       | proc       |           | ft       |
|        | tof         | 2198.1      | fn         |           | not used |
|        | nt          | 14000       | math       |           | f        |
|        | ct          | 14000       |            |           |          |
|        | alock       | n           |            |           |          |
|        | gain        | 60          | werr       |           | wexp     |
|        | FLAGS       |             | wbs        |           | wrt      |
|        | il          | n           |            |           |          |
|        | in          | n           |            |           |          |
|        | dp          | y           |            |           |          |
|        | hs          | nm          |            |           |          |
|        | DISPLAY     |             |            |           |          |
|        | sp          | -628.7      |            |           |          |
|        | wp          | 25766.5     |            |           |          |
|        | vs          | 7887        |            |           |          |
|        | WC          | 0           |            |           |          |
|        | SC          | 250         |            |           |          |
|        | hzm         | 103.07      |            |           |          |
|        | is          | 500.00      |            |           |          |
|        | rfl         | 8539.3      |            |           |          |
|        | rfd         | 6138.9      |            |           |          |
|        | th          | 68          |            |           |          |
|        | ins         | 100.000     |            |           |          |
|        | ai          | cdc         |            |           |          |
|        |             | ph          |            |           |          |

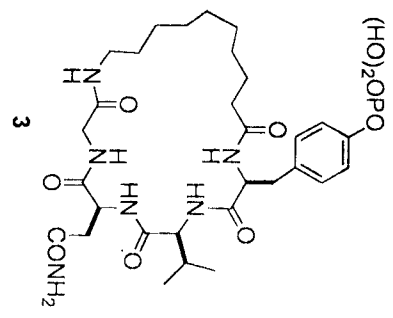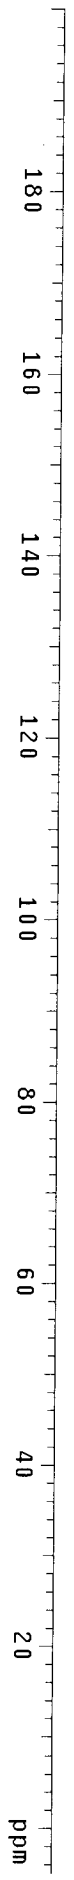

JEDI-286  
Jedi286\_h1  
expi s2pul

SAMPLE

date Jan 26 2006

DEC. & VT

499.869

H1

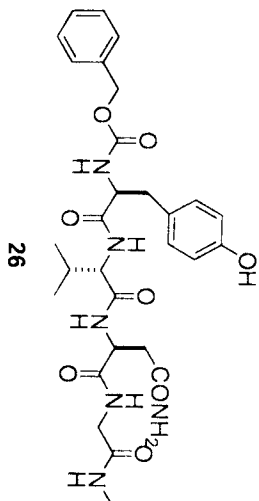

ACQUISITION  
sfrq 499.870  
tr 1  
at 3.996  
np 73980  
sw 9256.0  
fb not used  
bs 32  
tpwr 57  
pw 2.0  
dl 2.00  
tof 1124.6  
nt 64  
ct 64  
alock 64  
gain 30  
flags n  
il n  
in n  
dd y  
hs y  
DISPLAY  
sp -250.0  
wp 6248.3  
vs 579  
sc 0  
wc 250  
hzm 24.99  
is 4492.40  
rfi 2257.0  
rfp 1244.7  
ins 1.000  
ai 1.000

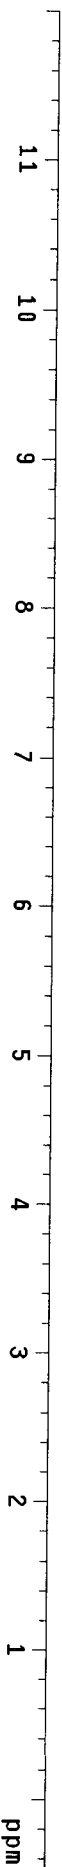

JEDI-286  
jed1286\_c13

exp4 s2pu1

SAMPLE DEC. & VT  
date Jan 26 2006 dfrq 499.869  
solvent DMSO dn H1  
file exp dpwr 37  
ACQUISITION dof 0  
sfrq 125.706 dm VVY  
tn C13 dmm VVY  
at 1.278 dmf 10582  
mp 85282 dseq  
sw 33333.3 dres 1.0  
fb not used homo n  
bs temp 64 temp 27.0  
tpwr 53 lb PROCESSING 1.00  
pw 3.0 wtfile  
dl 2.000 proc  
tof 2198.1 ft  
nt 10000 fn not used  
ct 10000 math f  
a1 cdc ph 100.000

FLAGS  
i1 n wert  
in n wexp  
dp n wbs  
hs y wnt

DISPLAY  
sp -628.5  
wp 25766.5  
vs 4618  
sc 0  
wc 250  
hzmm 103.07  
is 500.00  
rf1 7585.1  
rfp 4984.8  
th 68  
a1 100.000

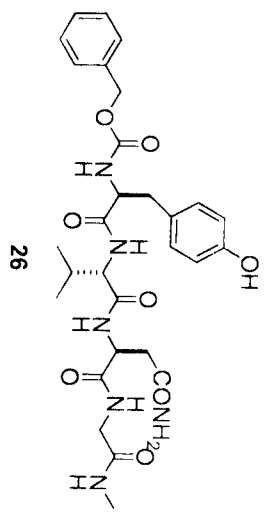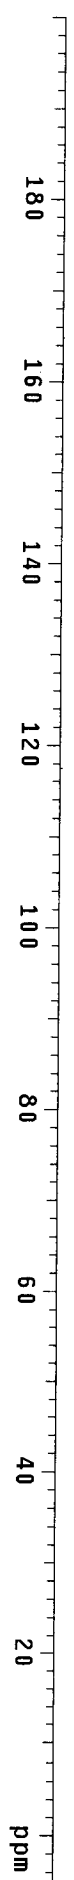

Jed7-65

Pulse Sequence: szpul  
Solvent: cd3od  
Ambient temperature  
File: Jed7-66  
INDVA-500 "nmraastro"

Relax. delay 2.000 sec  
Pulse 16.4 degrees  
Acq. time 2.856 sec  
Width 5602.2 Hz  
36 repetitions  
OBSERVE H1, 400.2685529 MHz  
DATA PROCESSING  
Line broadening 0.1 Hz  
FT size 32768  
Total time 2 min, 55 sec

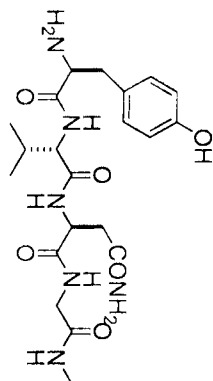

27

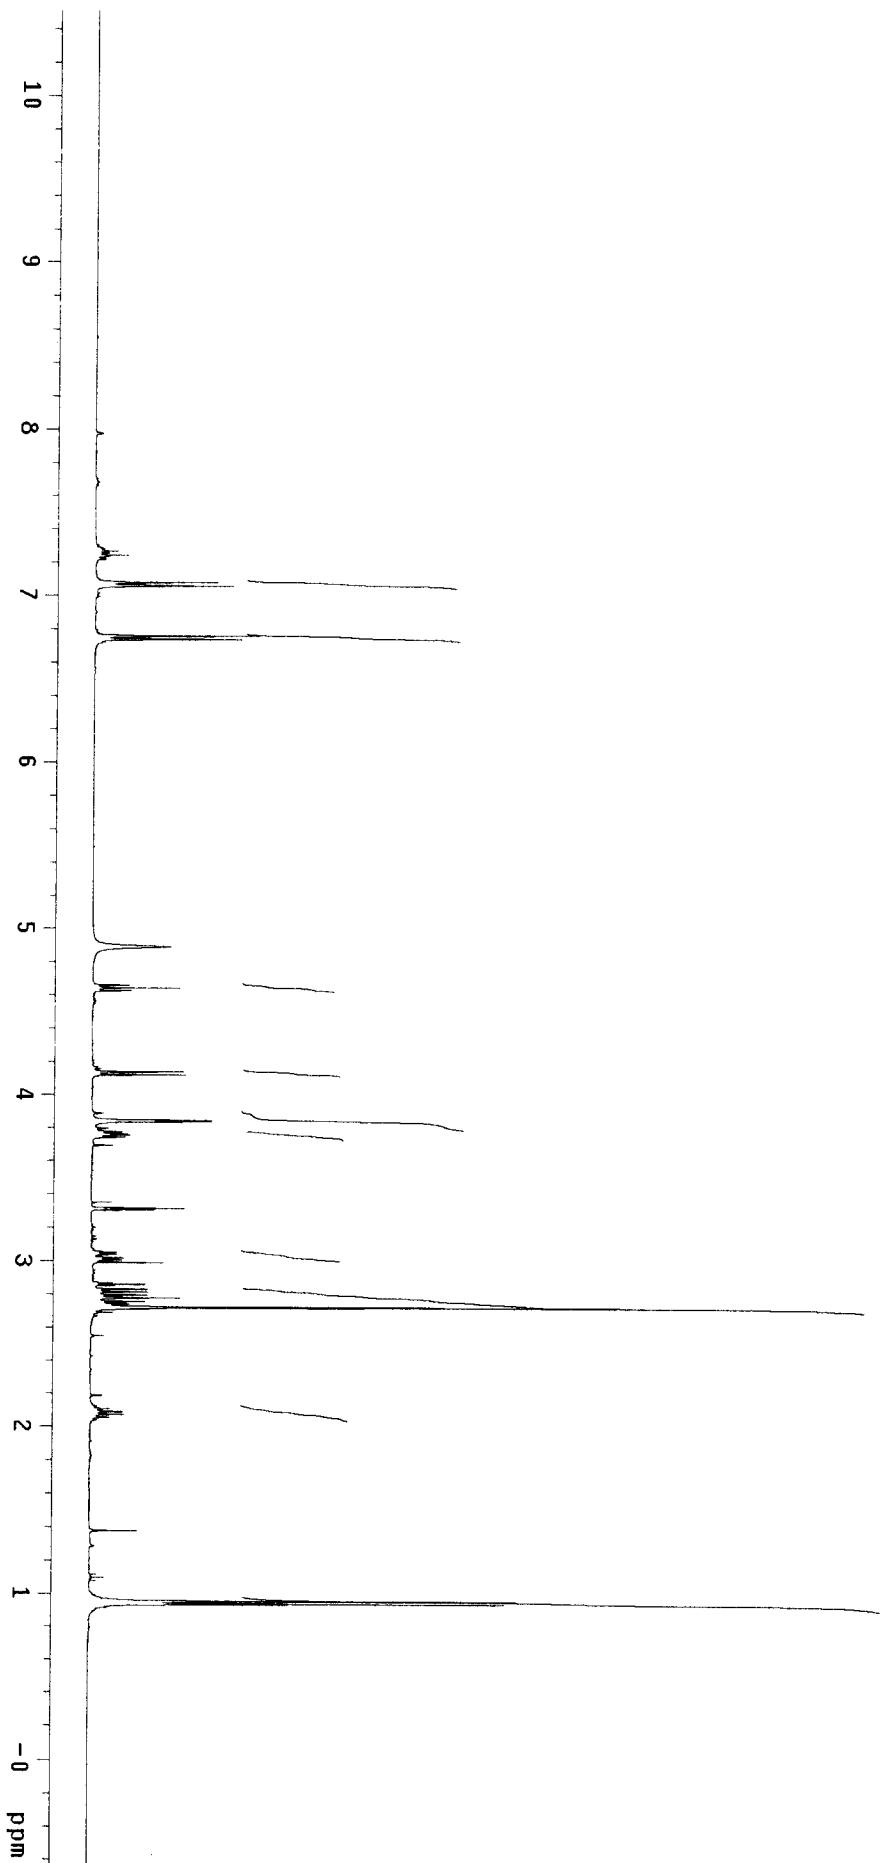

jed7-66

Pulse Sequence: s2pu1  
Solvent: cd3od  
Ambient temperature  
UNITYplus-300 "nmr2"

Relax. delay 2.000 sec  
Pulse 36.0 degrees  
Acq. time 1.777 sec  
Width 18009.9 Hz  
807 repetitions  
OBSERVE C13, 75.4702116 MHz  
DECOUPLE H1, 300.1421085 MHz  
Power 40 dB  
continuously on  
WALTZ-16 modulated  
Single precision data  
DATA PROCESSING  
Line broadening 1.0 Hz  
FT size 65536  
Total time 17 hr, 53 min, 9 sec

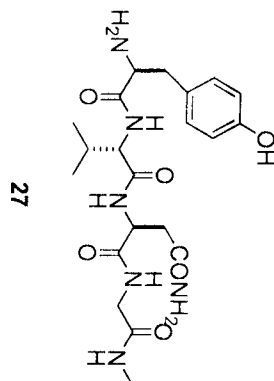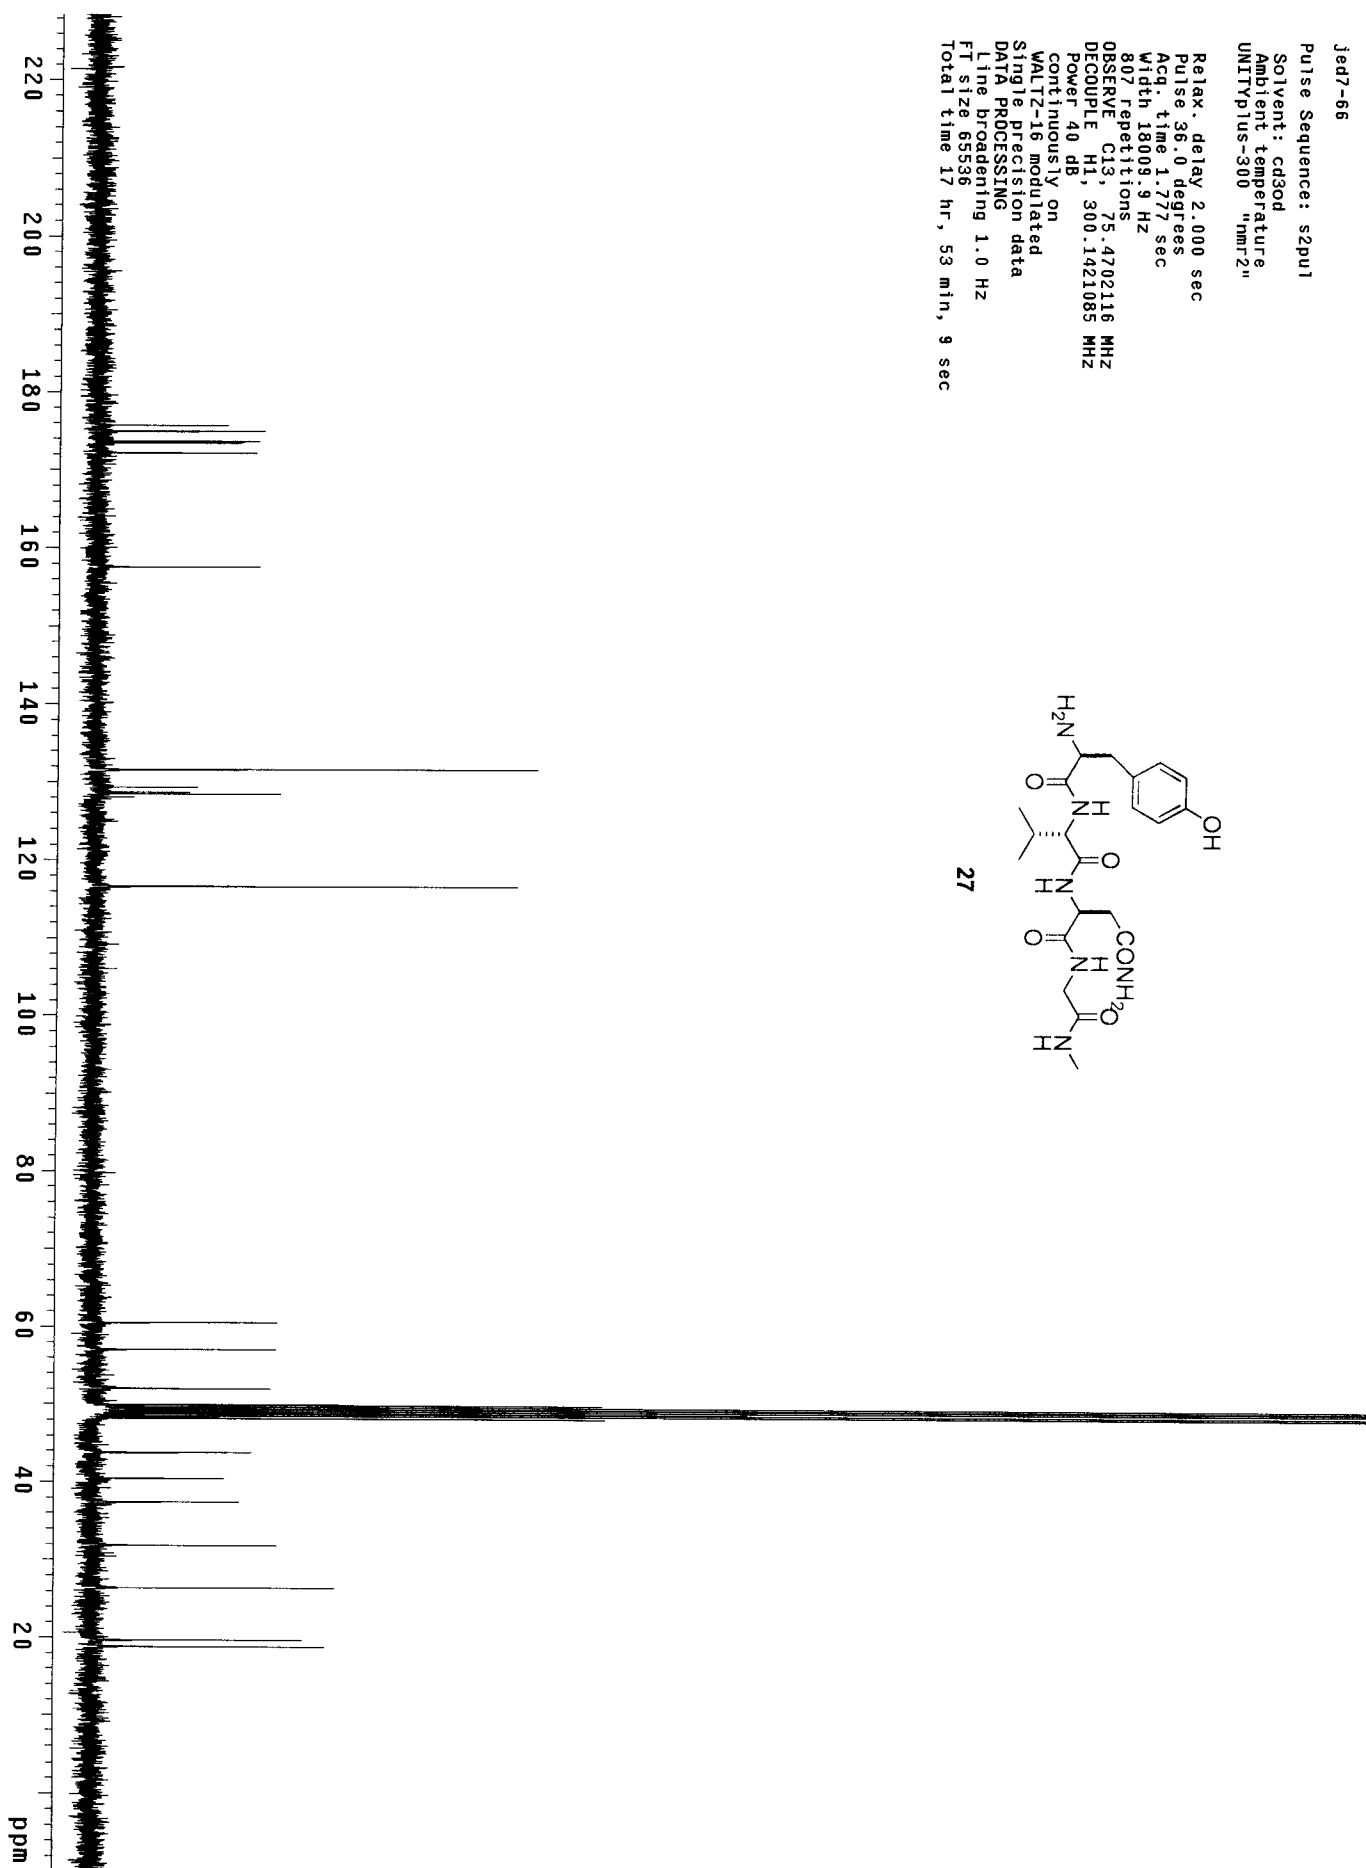

JEDI-258  
jedi258\_h1

exp1 presat

| SAMPLE      |            | SATURATION |            |
|-------------|------------|------------|------------|
| date        | Oct 6 2005 | sspul      | n          |
| solvent     | cd3od      | satpwr     | -12        |
| file        | exp        | satfrg     | -75.8      |
| ACQUISITION | 499.870    | satdly     | 2.000      |
| sfrq        | 499.870    | satmode    | ymn        |
| tn          | h1         | composit   | n          |
| dt          | 3.986      | DEC.       | &          |
| np          | 73980      | dn         |            |
| sw          | 9256.0     | dof        | 2.8        |
| fb          | 5000       | dm         | nmn        |
| bs          | 32         | dmm        | 200        |
| ss          | 2          | dmf        | 30         |
| tpwr        | 57         | dpwr       | 27.0       |
| pw          | 2.0        | temp       | PROCESSING |
| di          | 0          |            | 0.10       |
| tof         | 1124.6     | 1b         | wtfile     |
| nt          | 64         | wtfile     |            |
| ct          | 64         | proc       | not used   |
| atlock      | n          | fn         | f          |
| gain        | 10         | math       | f          |
| fl          | n          | werf       |            |
| in          | n          | wexp       |            |
| dp          | y          | wds        |            |
| hs          | nm         | wnt        |            |

  

| DISPLAY |          | Wft |
|---------|----------|-----|
| sp      | -250.1   |     |
| wp      | 5248.5   |     |
| vs      | 5929     |     |
| sc      | 0        |     |
| wc      | 250      |     |
| hzmm    | 20.99    |     |
| ts      | 72738.42 |     |
| rfti    | 2567.7   |     |
| rftp    | 1649.6   |     |
| th      | 4        |     |
| ins     | 2.000    |     |
| ai      | cdc      | ph  |

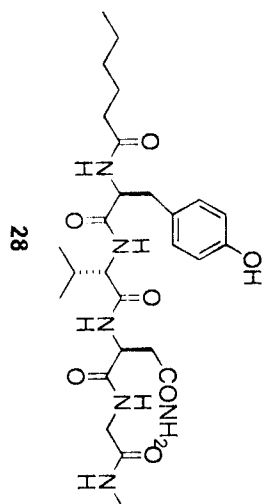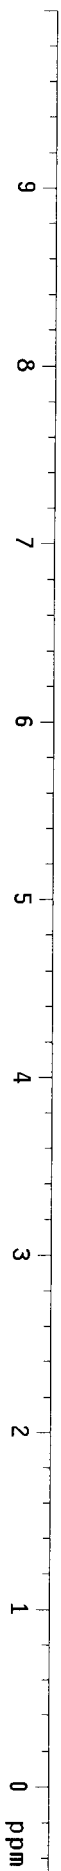



JED1-258  
jed1258\_c13  
exp4 s2pu1

|        |             |            |            |           |          |
|--------|-------------|------------|------------|-----------|----------|
| SAMPLE | date        | Oct 6 2005 | dfrrq      | DEC. & VT | 499.869  |
|        | solvent     | cd30d      | dn         |           | H1       |
|        | file        | exp        | dpwr       |           | 37       |
|        | ACQUISITION | 125.706    | doF        |           | 0        |
|        | tn          | C13        | dm         | yyy       | w        |
|        | at          | 1.279      | dmm        |           | 10582    |
|        | np          | 85262      | dmt        |           |          |
|        | sw          | 3333.3     | dseq       |           | 1.0      |
|        | fb          | not used   | homo       |           | n        |
|        | bs          | 64         | temp       |           | 27.0     |
|        | tpwr        | 53         | PROCESSING |           | 1.00     |
|        | pw          | 3.0        | lb         |           | wfille   |
|        | dl          | 2.000      | wtfile     |           | 1.00     |
|        | tof         | 2198.1     | proc       |           | ft       |
|        | nt          | 10000      | fn         |           | not used |
|        | ct          | 10000      | math       |           | f        |
|        | atlock      | n          |            |           |          |
|        | gain        | 60         | werr       |           | wexp     |
|        | fl          | n          | wbs        |           | wnt      |
|        | in          | n          |            |           |          |
|        | dp          | n          |            |           |          |
|        | hs          | y          |            |           |          |

  

|         |      |         |
|---------|------|---------|
| DISPLAY | sp   | -628.7  |
|         | wp   | 25766.5 |
|         | vs   | 8244    |
|         | sc   | 0       |
|         | wc   | 250     |
|         | hzmm | 103.07  |
|         | js   | 500.00  |
|         | rfl  | 8538.8  |
|         | rfd  | 6158.9  |
|         | th   | 2       |
|         | ins  | 100.000 |
|         | ai   | cdc     |
|         |      | ph      |

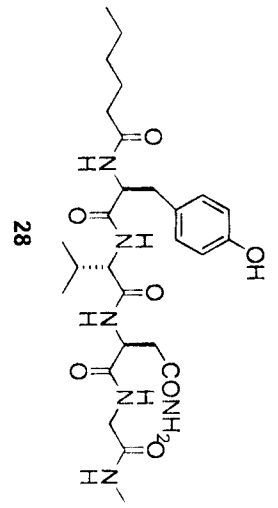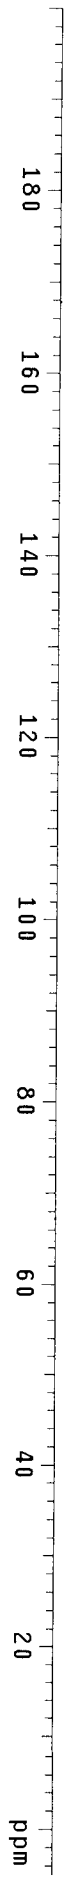

JEDI-267  
jedi267\_h1

exp1 presat

| SAMPLE      |             | SATURATION |          |
|-------------|-------------|------------|----------|
| date        | Oct 12 2005 | sspu1      | n        |
| solvent     | cd3od       | satpw      | -12      |
| file        | exp         | satfrg     | -73.0    |
| ACQUISITION | 499.870     | satdy      | 2.000    |
| sfrq        | 499.870     | satmode    | ym       |
| tn          | H1          | composit   | n        |
| at          | 3.996       | DEC. & VT  | H1       |
| np          | 73980       | dn         | -73.0    |
| sw          | 9256.0      | dof        | nm       |
| fb          | 5000        | dm         | nm       |
| bs          | 32          | dmm        | c        |
| ss          | 4           | dmf        | 200      |
| tpwr        | 57          | dpr        | 30       |
| pw          | 2.0         | temp       | 27.0     |
| d1          | 0           | PROCESSING | 0.10     |
| tof         | 1124.6      | lb         | wtfile   |
| nt          | 64          | wtfile     | ft       |
| ct          | 64          | proc       | not used |
| alock       | n           | fn         | f        |
| gain        | 30          | math       | f        |
| fl          | n           | werr       | n        |
| in          | n           | wexp       | y        |
| dp          | y           | wbs        | nm       |
| hs          | nm          | wnt        | wt       |
| DISPLAY     |             | wft        |          |
| sp          | -250.1      |            |          |
| wp          | 5248.5      |            |          |
| vs          | 795         |            |          |
| sc          | 0           |            |          |
| wc          | 250         |            |          |
| hzm         | 20.99       |            |          |
| ts          | 7791.96     |            |          |
| rfl         | 2667.7      |            |          |
| rflp        | 1649.6      |            |          |
| th          | 3           |            |          |
| ins         | 2.000       |            |          |
| ai          | cdc         | ph         |          |

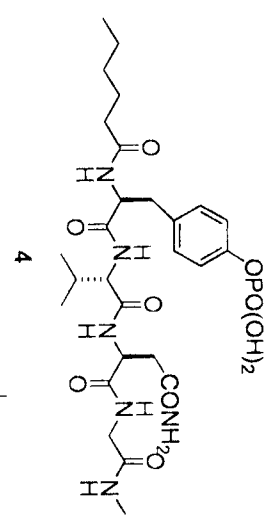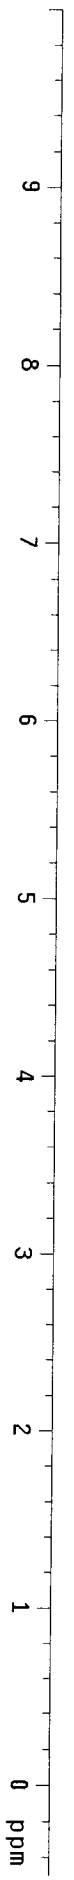

JEDI-267  
jedi267\_c13

exp4 s2put1

|             |            |             |        |           |         |
|-------------|------------|-------------|--------|-----------|---------|
| SAMPLE      | date       | Oct 12 2005 | dfrrq  | DEC. & VT | 499.869 |
| solvent     | file       | cd30d       | dn     | H1        | 37      |
| ACQUISITION | exp        | 125.706     | dpwr   | 0         | 0       |
| sfrrq       | dm         | 125.706     | dof    | YYV       | W       |
| tn          | dmm        | C13         | dmm    | 10582     | W       |
| at          | dmt        | 1.278       | dmt    | 1.0       | n       |
| np          | dseq       | 85262       | dseq   | 1.0       | n       |
| sw          | dres       | 33333.3     | dres   | not used  | f       |
| fb          | homo       | not used    | homo   | 27.0      | n       |
| bs          | temp       | 64          | temp   | 1.00      | n       |
| ss          | PROCESSING | 32          | temp   | 1.00      | n       |
| tpwr        | lb         | 53          | lb     | 1.00      | n       |
| pw          | wtfile     | 3.0         | wtfile | 1.00      | n       |
| d1          | proc       | 2.000       | proc   | not used  | f       |
| tof         | fn         | 2198.1      | fn     | not used  | f       |
| nt          | math       | 8000        | math   | not used  | f       |
| ct          | math       | 8000        | math   | not used  | f       |
| clock       | math       | 8000        | math   | not used  | f       |
| gain        | werr       | 60          | werr   | not used  | f       |
| il          | wexp       | n           | wexp   | not used  | f       |
| in          | wbs        | n           | wbs    | not used  | f       |
| dp          | wrt        | y           | wrt    | not used  | f       |
| hs          | wrt        | n           | wrt    | not used  | f       |

DISPLAY

|      |         |
|------|---------|
| sp   | -628.7  |
| wp   | 25766.5 |
| vs   | 7759    |
| sc   | 0       |
| wc   | 250     |
| hzmm | 103.07  |
| is   | 500.00  |
| rfti | 8538.8  |
| rffp | 6158.9  |
| th   | 1       |
| ins  | 100.000 |
| at   | cdc ph  |

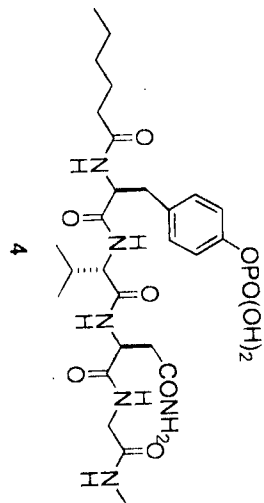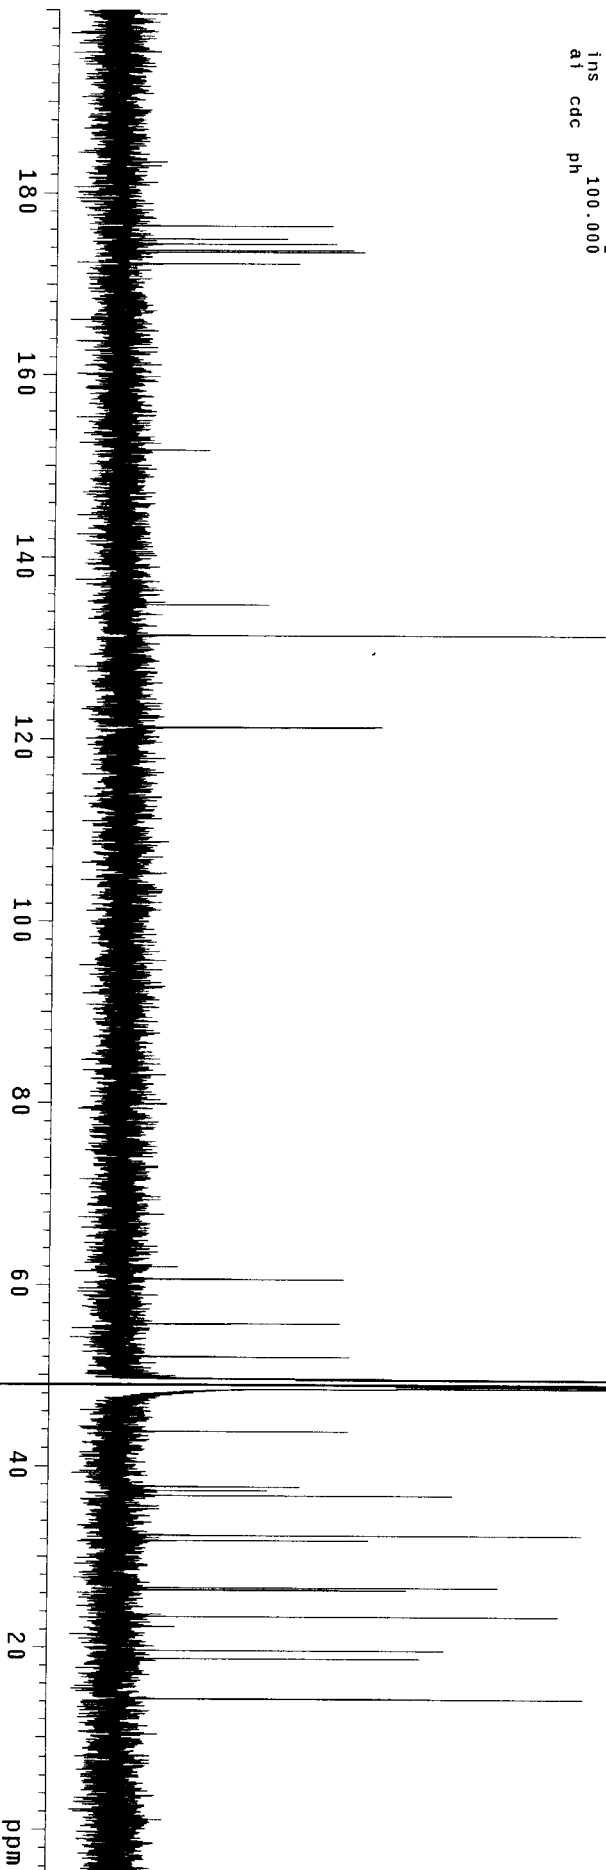

JEDI1-35  
jedi135\_h1

expt1 s2pu1

SAMPLE DEC. & VT  
date Jan 12 2006 dfrq 499.869  
solvent DMSO dn H1  
file exp dpwr 30  
ACQUISITION dof 0  
sfrq 499.870 dm nm  
tn H1 dmm c  
at 3.936 dimf 200  
np 73980 dseq  
sw 9256.0 dres 1.0  
fb not used homo  
bs 32 temp 27.0  
tpwr 57 PROCESSING  
pw 2.0 lb 0.10  
d1 2.000 wtfile  
tof 1124.6 proc ft  
nt 64 fn not used  
ct 64 math f  
gain 30  
alock n  
i1 30 wert  
in n wert  
dp n wexp  
hs y wbs  
n y wnt

DISPLAY  
sp -250.0  
wp 6248.3  
vs 212  
sc 0  
wc 250  
hzmm 24.99  
fs 3045.21  
fft 4236.5  
ftf 1244.7  
th 5  
ins 100.000  
at ph

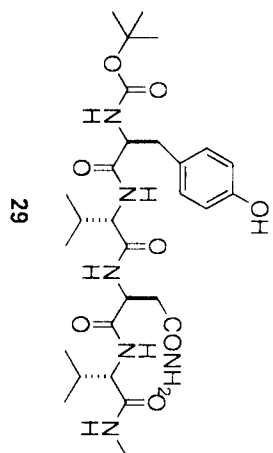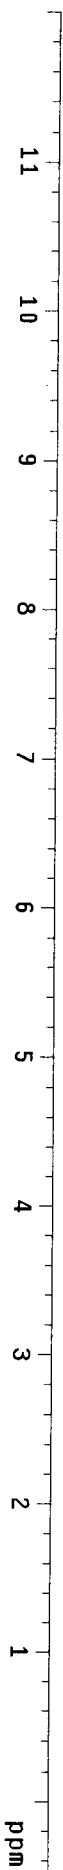

JEDII-35  
jedii35\_c13  
exp4 szpu1

SAMPLE DEC. & VT

date Jan 12 2006 dfrq 499.869

solvent DMSO dn H1

file exp dpwr 37

ACQUISITION dof 0

sfrq 125.706 dm YYY W

tn C13 dmm 10582

dt 1.279 dmf

np 85262 dseq

sw 3333.3 dres 1.0

fb not used homo n

bs 64 temp 27.0

tpwr 53 PROCESSING 1.00

pw 3.0 lb wfile ft

di 2.000 proc f

tof 2198.1 fn not used

nt 10000 math f

ct 10000

alock n

gain 50

FLAGS werr

il n wexp

in n wbs

dp y wrt

hs nm

DISPLAY

sp -628.5

wp 25766.5

vs 3915

sc 0

wc 250

h2mm 103.07

is 500.00

ft1 7385.1

rfp 4964.8

th 1

ins 100.000

ai cdc ph

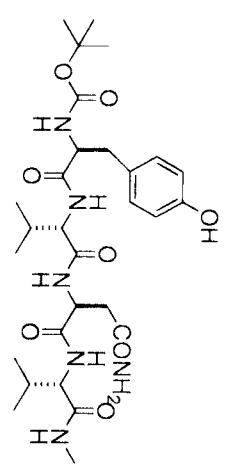

29

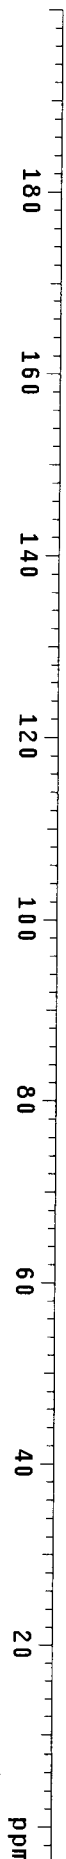

JEDI1-36  
jed136\_h1

exp1 s2pu1

|             |         |             |            |           |          |
|-------------|---------|-------------|------------|-----------|----------|
| SAMPLE      | date    | Jan 25 2006 | dfrq       | DEC. A VT | 499.869  |
|             | solvent | DMSO        | dn         |           | H1       |
|             | file    | exp         | dpwr       |           | 30       |
|             |         |             | dof        |           | 0        |
| ACQUISITION | sfrq    | 499.870     | dm         |           | nm       |
|             | tn      | H1          | dmm        |           | nm       |
|             | at      | 3.998       | dmt        |           | 200      |
|             | np      | 73980       | dseq       |           | C        |
|             | sw      | 9256.0      | homo       |           | 1.0      |
|             | fb      | not used    | temp       |           | n        |
|             | bs      | 57          | temp       |           | 27.0     |
|             | tpwr    | 32          | PROCESSING |           | 0.10     |
|             | pw      | 2.000       | 1b         |           | ft       |
|             | d1      | 2.000       | wtfile     |           | ft       |
|             | tof     | 1124.6      | proc       |           | not used |
|             | nt      | 64          | fn         |           | f        |
|             | ct      | 64          | math       |           | f        |
|             | gain    | 30          | werr       |           | wft      |
|             | alock   | n           | wexp       |           |          |
|             | il      | n           | wbs        |           |          |
|             | in      | n           | wrt        |           |          |
|             | dp      | y           |            |           |          |
|             | hs      | nm          |            |           |          |
|             | hs      | nm          |            |           |          |
| DISPLAY     | sp      | -250.0      |            |           |          |
|             | wp      | 6248.3      |            |           |          |
|             | vs      | 458         |            |           |          |
|             | sc      | 0           |            |           |          |
|             | wc      | 250         |            |           |          |
|             | hzmm    | 24.99       |            |           |          |
|             | is      | 20371.15    |            |           |          |
|             | rfl     | 2258.2      |            |           |          |
|             | rtp     | 1244.7      |            |           |          |
|             | th      | 7           |            |           |          |
|             | ins     | 1.000       |            |           |          |
|             | al      | 1.000       |            |           |          |

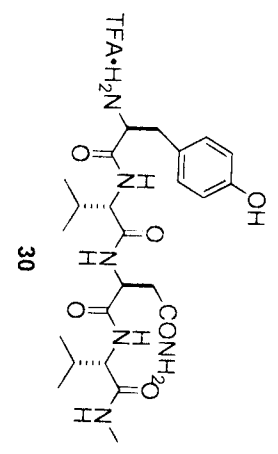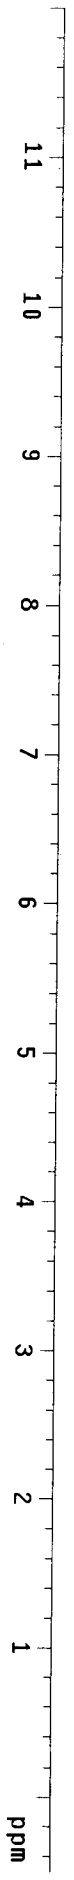

JEDI1-36  
 jedi136\_c13  
 exp4 s2pu1

|             |        |             |            |           |          |
|-------------|--------|-------------|------------|-----------|----------|
| date        | SAMPLE | Jan 25 2006 | dfreq      | DEC. & VT | 499.869  |
| solvent     |        | DMSO        | dn         |           | H1       |
| file        | exp    |             | dpwr       |           | 37       |
| ACQUISITION |        |             |            |           |          |
| sfrq        |        | 125.706     | dm         |           | 0        |
| tn          |        | C13         | dmm        |           | YVY      |
| at          |        | 1.278       | dmf        |           | W        |
| np          |        | 85262       | dseq       |           | 10582    |
| sw          |        | 33333.3     | dres       |           | 1.0      |
| fb          |        | not used    | homo       |           | n        |
| bs          |        | 64          | temp       |           | 27.0     |
| tpwr        |        | 53          | PROCESSING |           |          |
| pw          |        | 3.00        | lb         |           | 1.00     |
| di          |        | 2.000       | wtfile     |           |          |
| tof         |        | 2198.1      | proc       |           | ft       |
| nt          |        | 10000       | fn         |           | not used |
| ct          |        | 10000       | math       |           | f        |
| atlock      |        | n           |            |           |          |
| gain        |        | 60          | werr       |           |          |
| FLAGS       |        |             |            |           |          |
| il          |        | n           | wexp       |           |          |
| in          |        | n           | wbs        |           |          |
| dp          |        | y           | wnt        |           |          |
| hs          |        | nm          |            |           |          |
| DISPLAY     |        |             |            |           |          |
| sp          |        | -628.5      |            |           |          |
| wp          |        | 25766.5     |            |           |          |
| vs          |        | 11126       |            |           |          |
| sc          |        | 0           |            |           |          |
| wc          |        | 250         |            |           |          |
| h2mm        |        | 103.07      |            |           |          |
| is          |        | 500.00      |            |           |          |
| rfl         |        | 7586.2      |            |           |          |
| rfp         |        | 4984.8      |            |           |          |
| tn          |        | 68          |            |           |          |
| ins         |        | 100.000     |            |           |          |
| at          |        | cdc         |            |           |          |
| ph          |        |             |            |           |          |

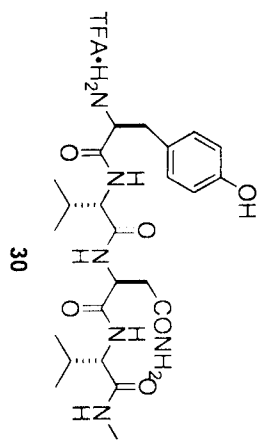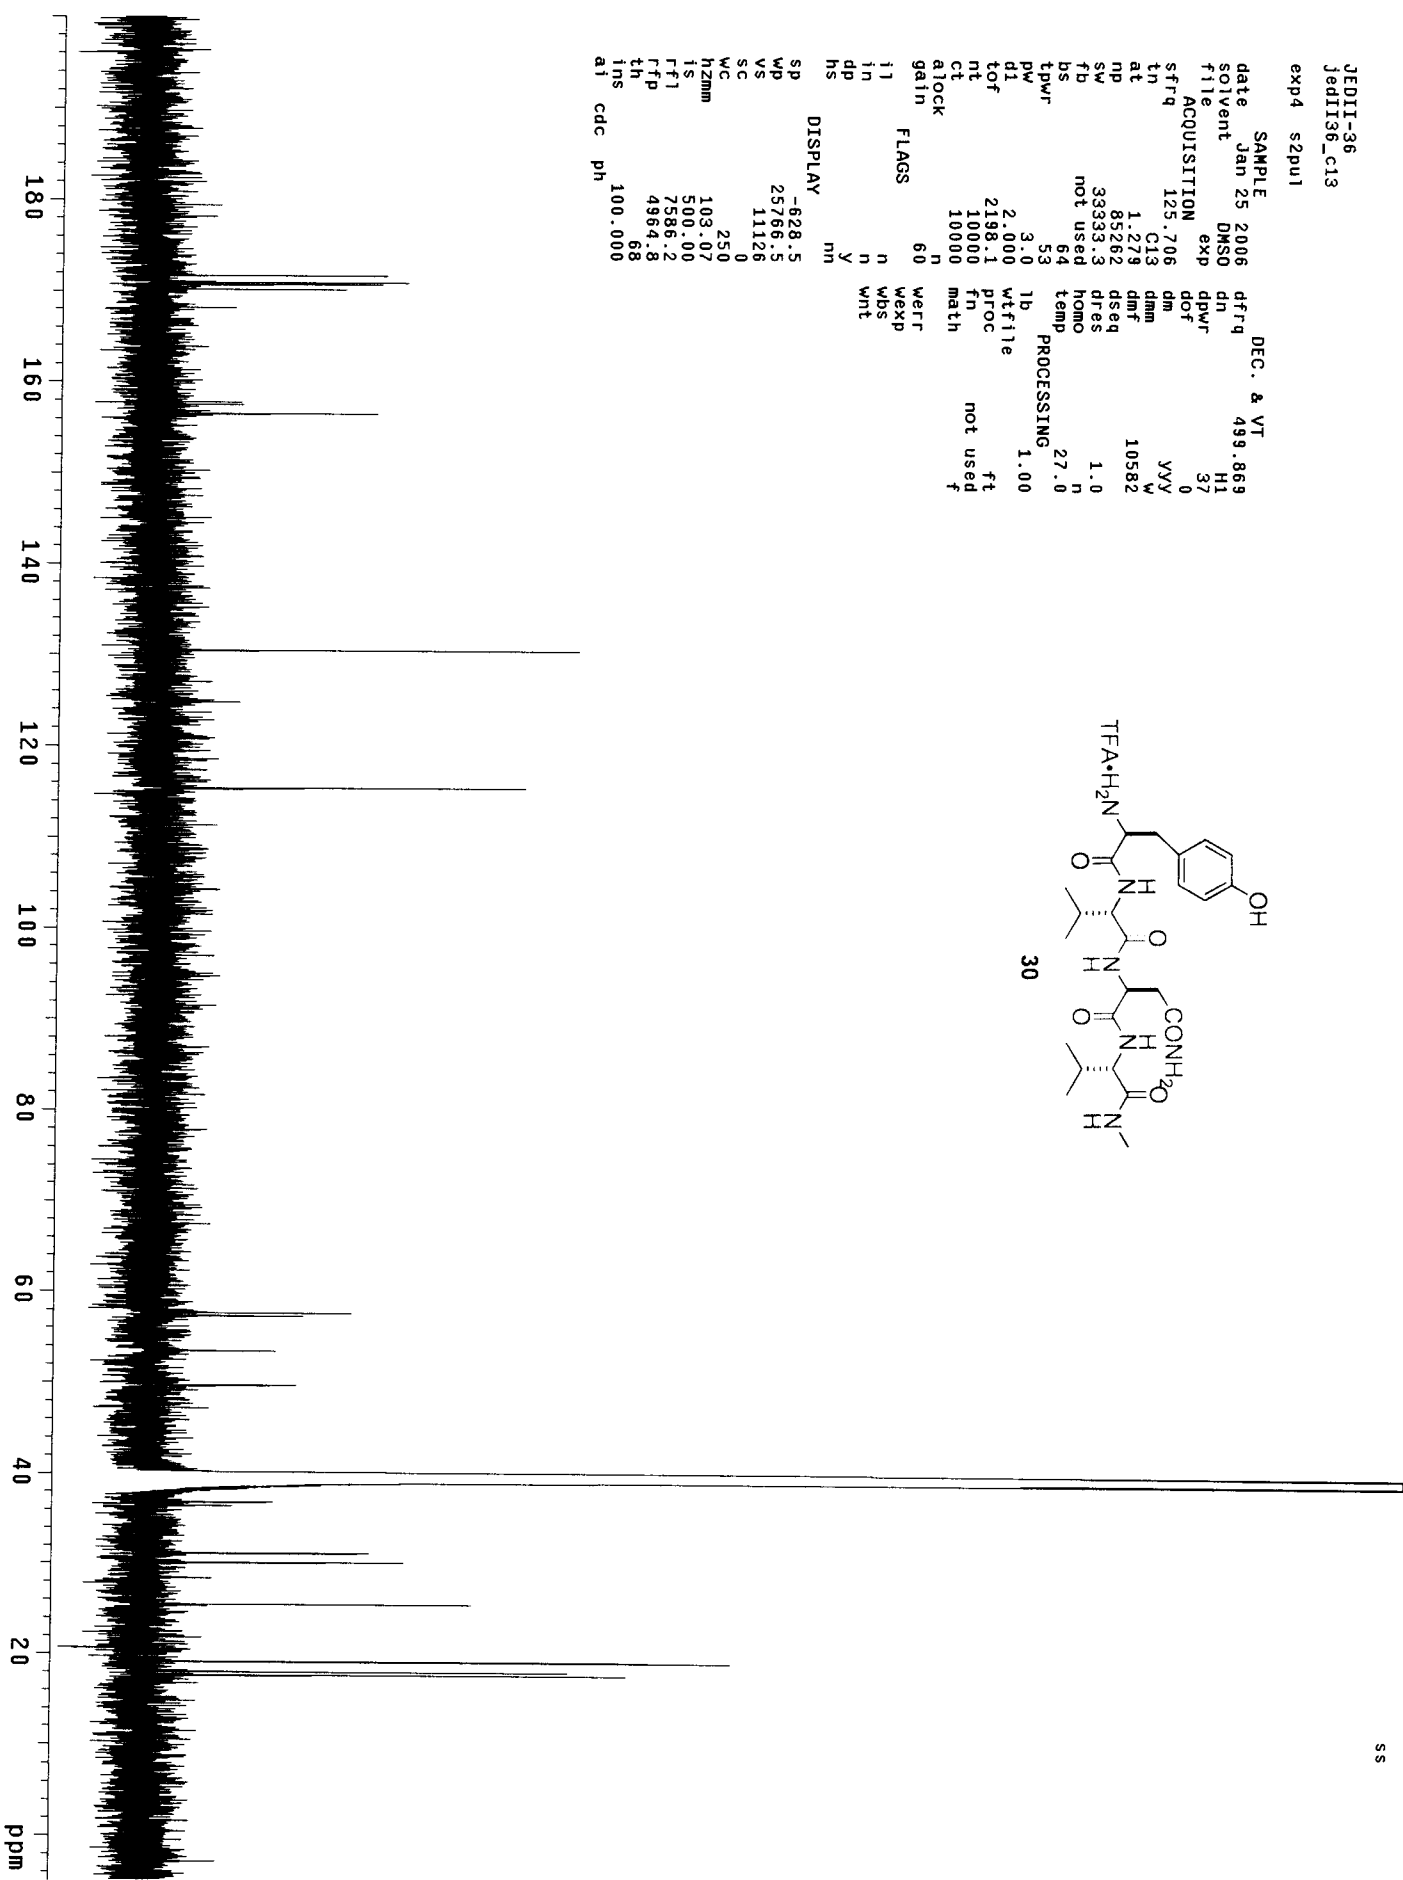

JEDII-39  
jediI39\_h1

exp1 presat

|         |             |         |      |           |            |            |
|---------|-------------|---------|------|-----------|------------|------------|
| date    | Jan 20 2006 | SAMPLE  | 2006 | sspu1     | SATURATION | n          |
| solvent | DMSO        | solvent | exp  | satpwr    | satpwr     | -14        |
| file    | ACQUISITION | file    | exp  | satfrq    | satfrq     | -838.3     |
| sfrq    | 499.870     | sfrq    | H1   | satdly    | satdly     | 2.000      |
| tn      | 3.996       | tn      | H1   | composit  | composit   | -          |
| at      | 73980       | at      | H1   | DEC. & VT | DEC. & VT  | -          |
| np      | 9256.0      | np      | 64   | dn        | dn         | H1         |
| sw      | 5000        | sw      | 64   | dof       | dof        | -838.3     |
| fb      | 32          | fb      | 64   | dm        | dm         | nm         |
| bs      | 57          | bs      | 30   | dmm       | dmm        | c          |
| ss      | 2.0         | ss      | 30   | dmf       | dmf        | 200        |
| tpwr    | 1124.6      | tpwr    | 0    | dpwr      | dpwr       | 27.0       |
| pw      | 0           | pw      | 0    | temp      | temp       | PROCESSING |
| di      | 0           | di      | 0    | temp      | temp       | 0.10       |
| tof     | 64          | tof     | 64   | wtfile    | wtfile     | not used   |
| nt      | 64          | nt      | 64   | proc      | proc       | f          |
| ct      | 64          | ct      | 64   | fn        | fn         | f          |
| alock   | 30          | alock   | 30   | math      | math       | not used   |
| gain    | 30          | gain    | 30   | math      | math       | f          |
| fl      | n           | fl      | n    | weff      | weff       | n          |
| in      | n           | in      | n    | wexp      | wexp       | n          |
| dp      | y           | dp      | y    | wbs       | wbs        | y          |
| hs      | nm          | hs      | nm   | wnt       | wnt        | nm         |

  

|      |         |         |     |
|------|---------|---------|-----|
| sp   | -250.0  | DISPLAY | wft |
| wp   | 5248.5  |         |     |
| vs   | 856     |         |     |
| sc   | 0       |         |     |
| wc   | 250     |         |     |
| hzmm | 20.99   |         |     |
| ts   | 8658.89 |         |     |
| rfl  | 2257.2  |         |     |
| rffp | 1244.7  |         |     |
| th   | 7       |         |     |
| ins  | 1.000   |         |     |
| ai   | ph      |         |     |

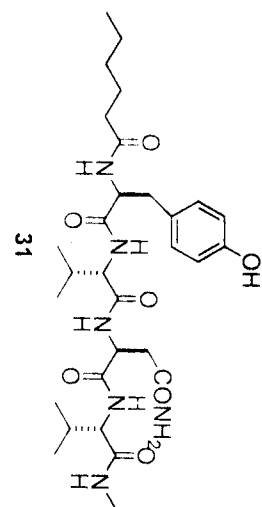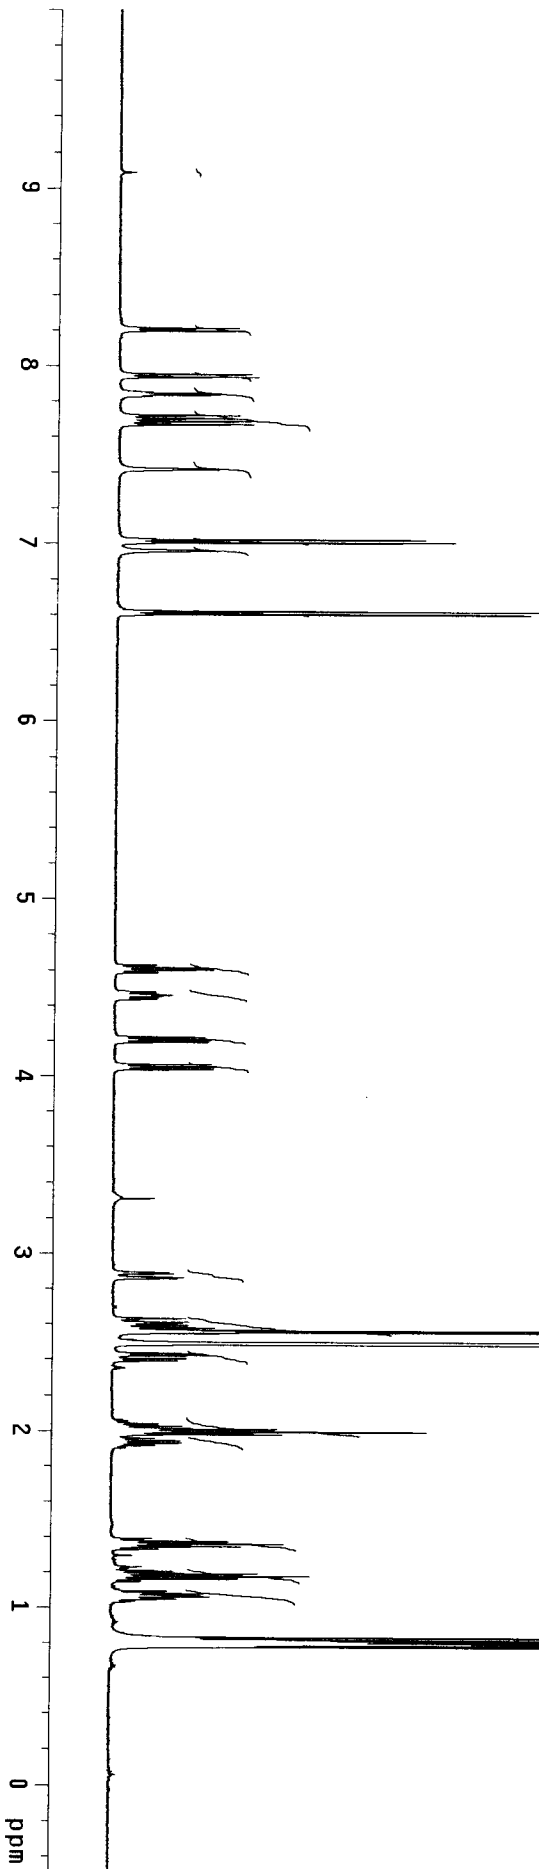



JEDI139  
jed139\_c13

exp4 s2pu1

|             |          |             |            |          |         |
|-------------|----------|-------------|------------|----------|---------|
| SAMPLE      | date     | Jan 20 2006 | DEC. & VT  | dfrq     | 499.869 |
| solvent     | DMSO     |             | dn         | H1       |         |
| file        | exp      |             | dpwr       | 37       |         |
| ACQUISITION | exp      |             | dof        | 0        |         |
| sfrq        | 125.706  |             | dmm        | YYY      |         |
| tn          | C13      |             | dmt        | W        |         |
| at          | 1.279    |             | dres       | 10582    |         |
| mp          | 85262    |             | dtemp      | 1.0      |         |
| sw          | 33333.3  |             | homo       | n        |         |
| fb          | not used |             | temp       | 27.0     |         |
| bs          | 64       |             | PROCESSING | 1.00     |         |
| tpwr        | 53       |             | lb         | 1b       |         |
| pw          | 3.0      |             | wtfile     | 1.00     |         |
| dl          | 2.000    |             | proc       | ft       |         |
| tof         | 2198.1   |             | fn         | not used |         |
| nt          | 20000    |             | math       | f        |         |
| ct          | 20000    |             | werr       |          |         |
| alock       | n        |             | wexp       |          |         |
| gain        | n        |             | wbs        |          |         |
| FLAGS       | 60       |             | wrt        |          |         |
| ll          | n        |             |            |          |         |
| in          | n        |             |            |          |         |
| dp          | y        |             |            |          |         |
| hs          | nm       |             |            |          |         |

|         |      |         |
|---------|------|---------|
| DISPLAY | sp   | -628.5  |
|         | wp   | 25766.5 |
|         | vs   | 9610    |
|         | sc   | 0       |
|         | wc   | 250     |
|         | h2mm | 103.07  |
|         | is   | 500.00  |
|         | rfl  | 7385.7  |
|         | rtp  | 4964.8  |
|         | th   | 68      |
|         | ins  | 100.000 |
|         | ai   | cdc ph  |

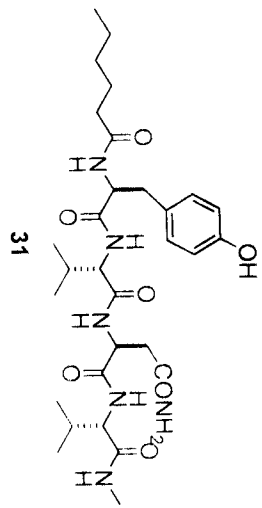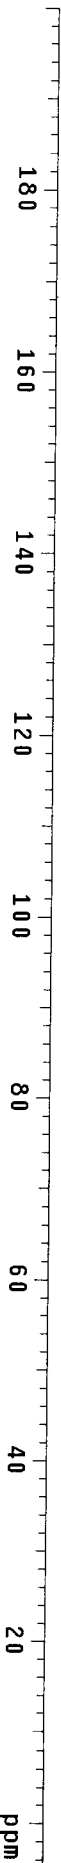

JEDII-26-2

expl presat

|             |            |            |            |
|-------------|------------|------------|------------|
| SAMPLE      |            | SATURATION |            |
| date        | Jan 2 2006 | sspul      | n          |
| solvent     | D2O        | satpwr     | -10        |
| file        | exp        | satfrq     | -165.8     |
| ACQUISITION |            | satdly     | 2.000      |
| sfrq        | 499.351    | satmode    | Ynn        |
| tn          | H1         | composit   | n          |
| at          | 4.865      | DEC. & VT  | H1         |
| np          | 64000      | dn         | -165.8     |
| sw          | 6577.3     | dof        | nmn        |
| fb          | 4000       | dm         | c          |
| bs          | 32         | dmm        | 200        |
| ss          | 4          | dmf        | 30         |
| tpwr        | 2.0        | dpwr       | 27.0       |
| pw          | 0          | temp       | PROCESSING |
| di          | 297.6      | lb         | 0.10       |
| tof         | 0          | wf         | ft         |
| nt          | 256        | wf         | not used   |
| ct          | 256        | proc       | f          |
| alock       | n          | fn         |            |
| gain        | 40         | math       |            |
| FLAGS       |            |            |            |
| fl          | n          | weff       | n          |
| in          | n          | wexp       | n          |
| dp          | y          | wbs        | y          |
| hs          | mn         | wnt        | mn         |
| DISPLAY     |            | wft        |            |
| sp          | -249.7     |            |            |
| wp          | 5243.1     |            |            |
| vs          | 40222      |            |            |
| sc          | 0          |            |            |
| wc          | 250        |            |            |
| hzmh        | 20.97      |            |            |
| is          | 934155.10  |            |            |
| rfl         | 494.2      |            |            |
| rffp        | 0          |            |            |
| th          | 7          |            |            |
| ins         | 10.000     |            |            |
| ai          | cdc        |            |            |
| ph          |            |            |            |

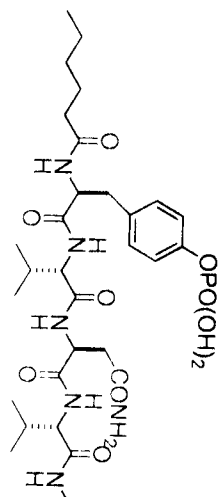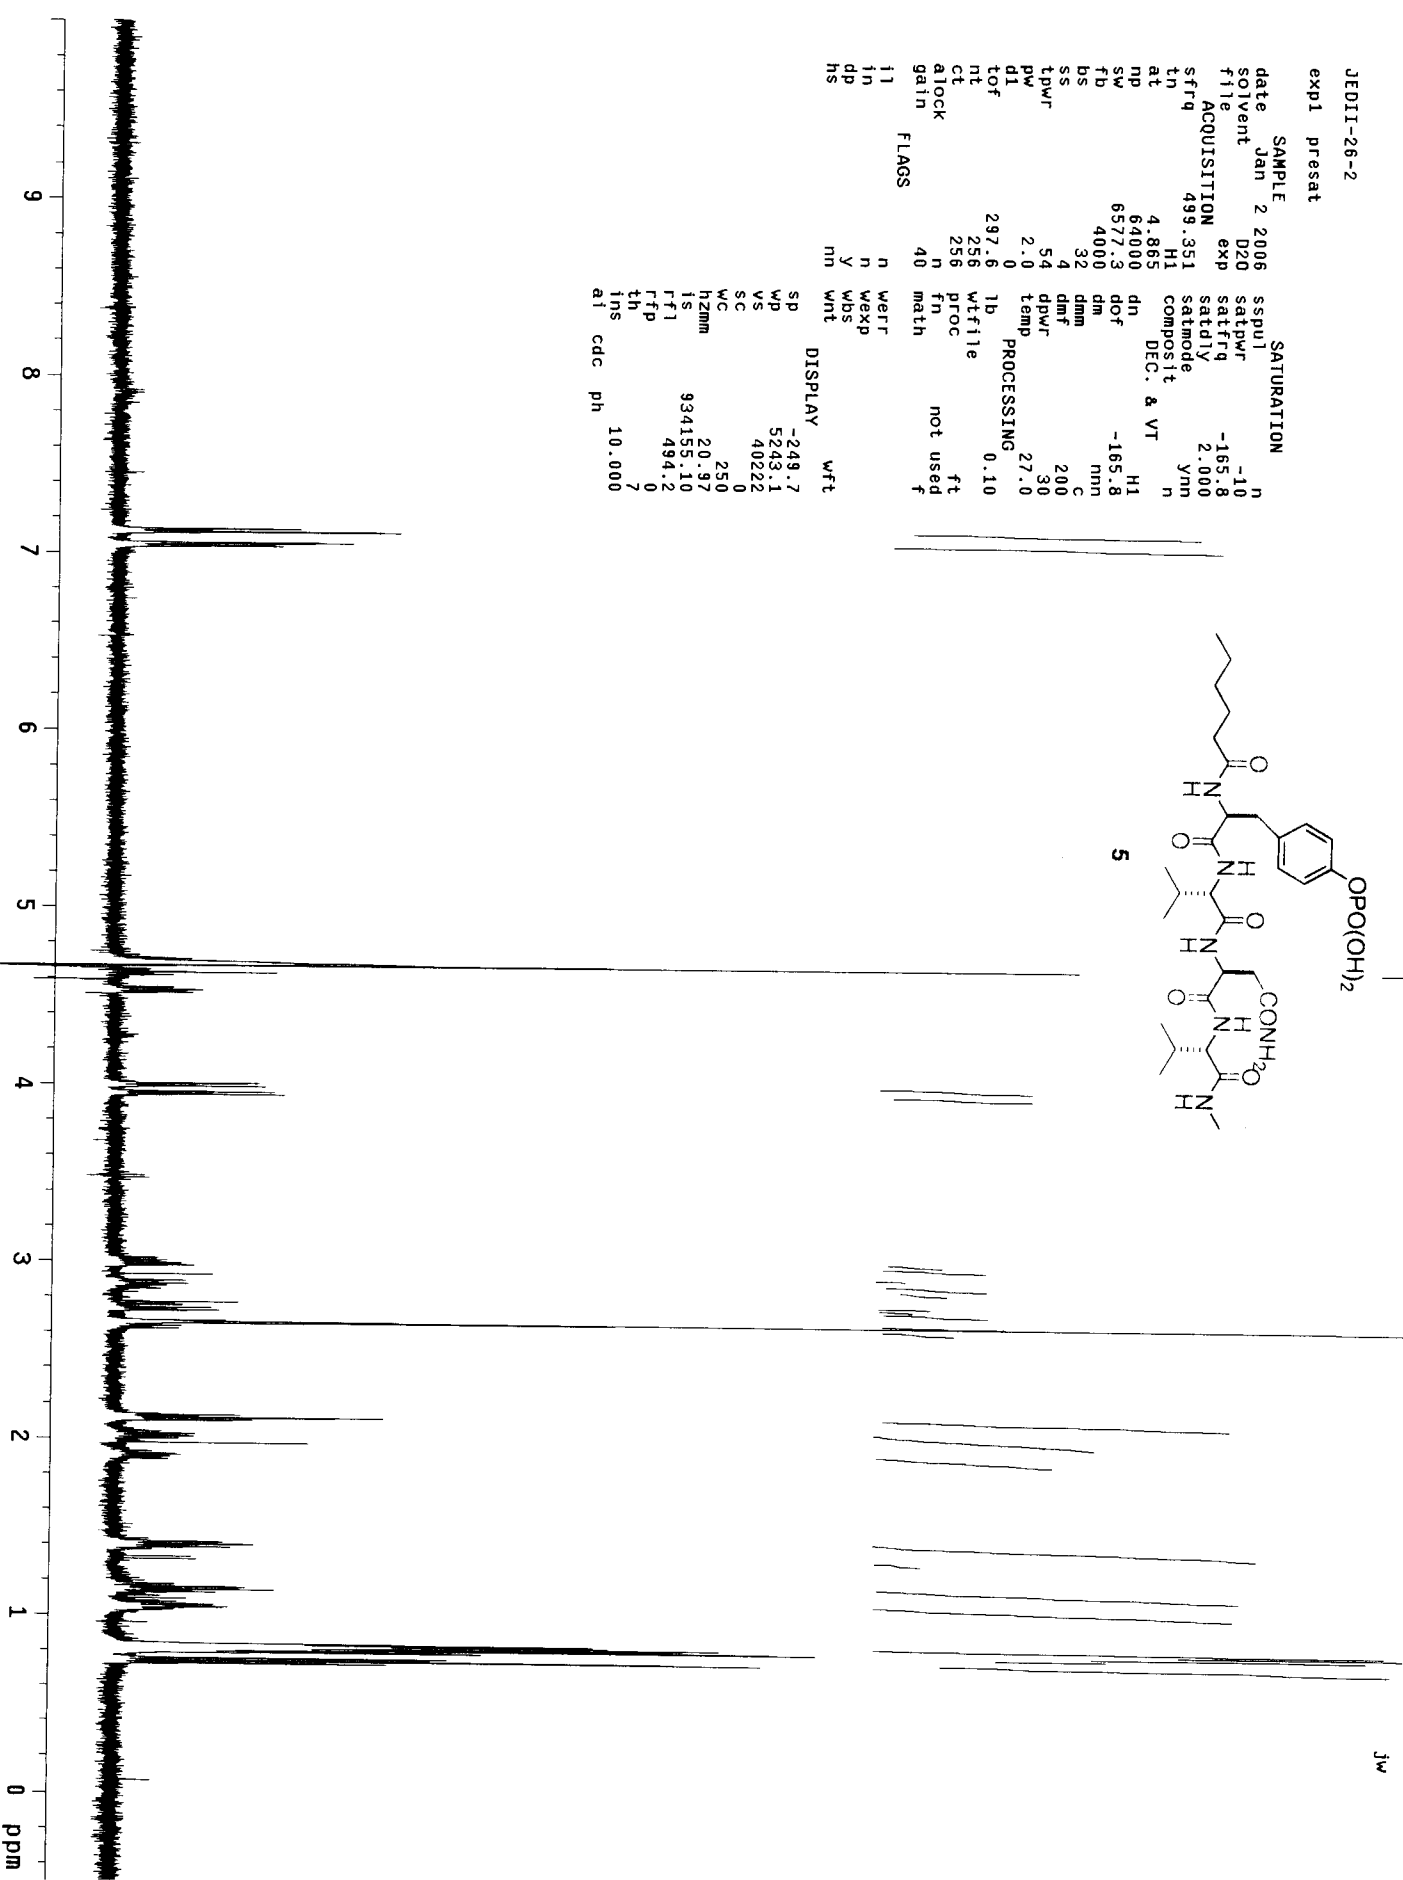

exp4 Carbon

|             |           |             |            |          |
|-------------|-----------|-------------|------------|----------|
| SAMPLE      | date      | Apr 26 2010 | temp       | 27.0     |
| SOLVENT     | solvent   | dmsc        | gain       | 50       |
| FILE        | file      | exp         | pin        | 20       |
| ACQUISITION | sw        | 30143.2     | nsf        | 0.008    |
|             | at        | 1.062       | pw90       | 15.500   |
|             | np        | 64024       | alpha      | 10.000   |
|             | fb        | 17000       | FLAGS      |          |
|             | bs        | 64          | i1         | n        |
|             | ss        | 128         | in         | n        |
|             | d1        | 2.000       | dp         | y        |
|             | nt        | 17000       | hs         | nm       |
|             | ct        | 17000       | PROCESSING | 1.00     |
|             | tn        | TRANSMITTER | fn         | not used |
|             | sfreq     | 125.588     | sp         | -628.2   |
|             | tof       | 1254.3      | wd         | 25742.4  |
|             | tpwr      | 51          | rfl        | 6934.2   |
|             | pw        | 8.000       | rfp        | 4960.2   |
|             | DECOUPLER | H1          | fp         | -93.0    |
|             | dn        | 0           | tp         | -212.5   |
|             | dof       | 0           | PL0T       |          |
|             | dm        | YVY         | wc         | 250      |
|             | dmm       | w           | sc         | 0        |
|             | dpwr      | 39          | vs         | 58707    |
|             | dmf       | 12600       | th         | 8        |
|             |           |             | at         | cdc ph   |

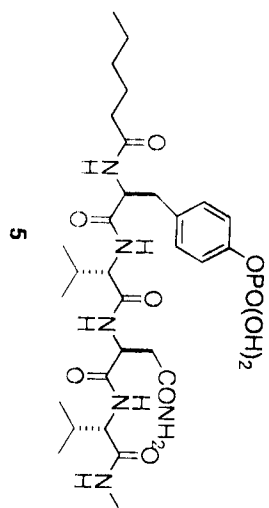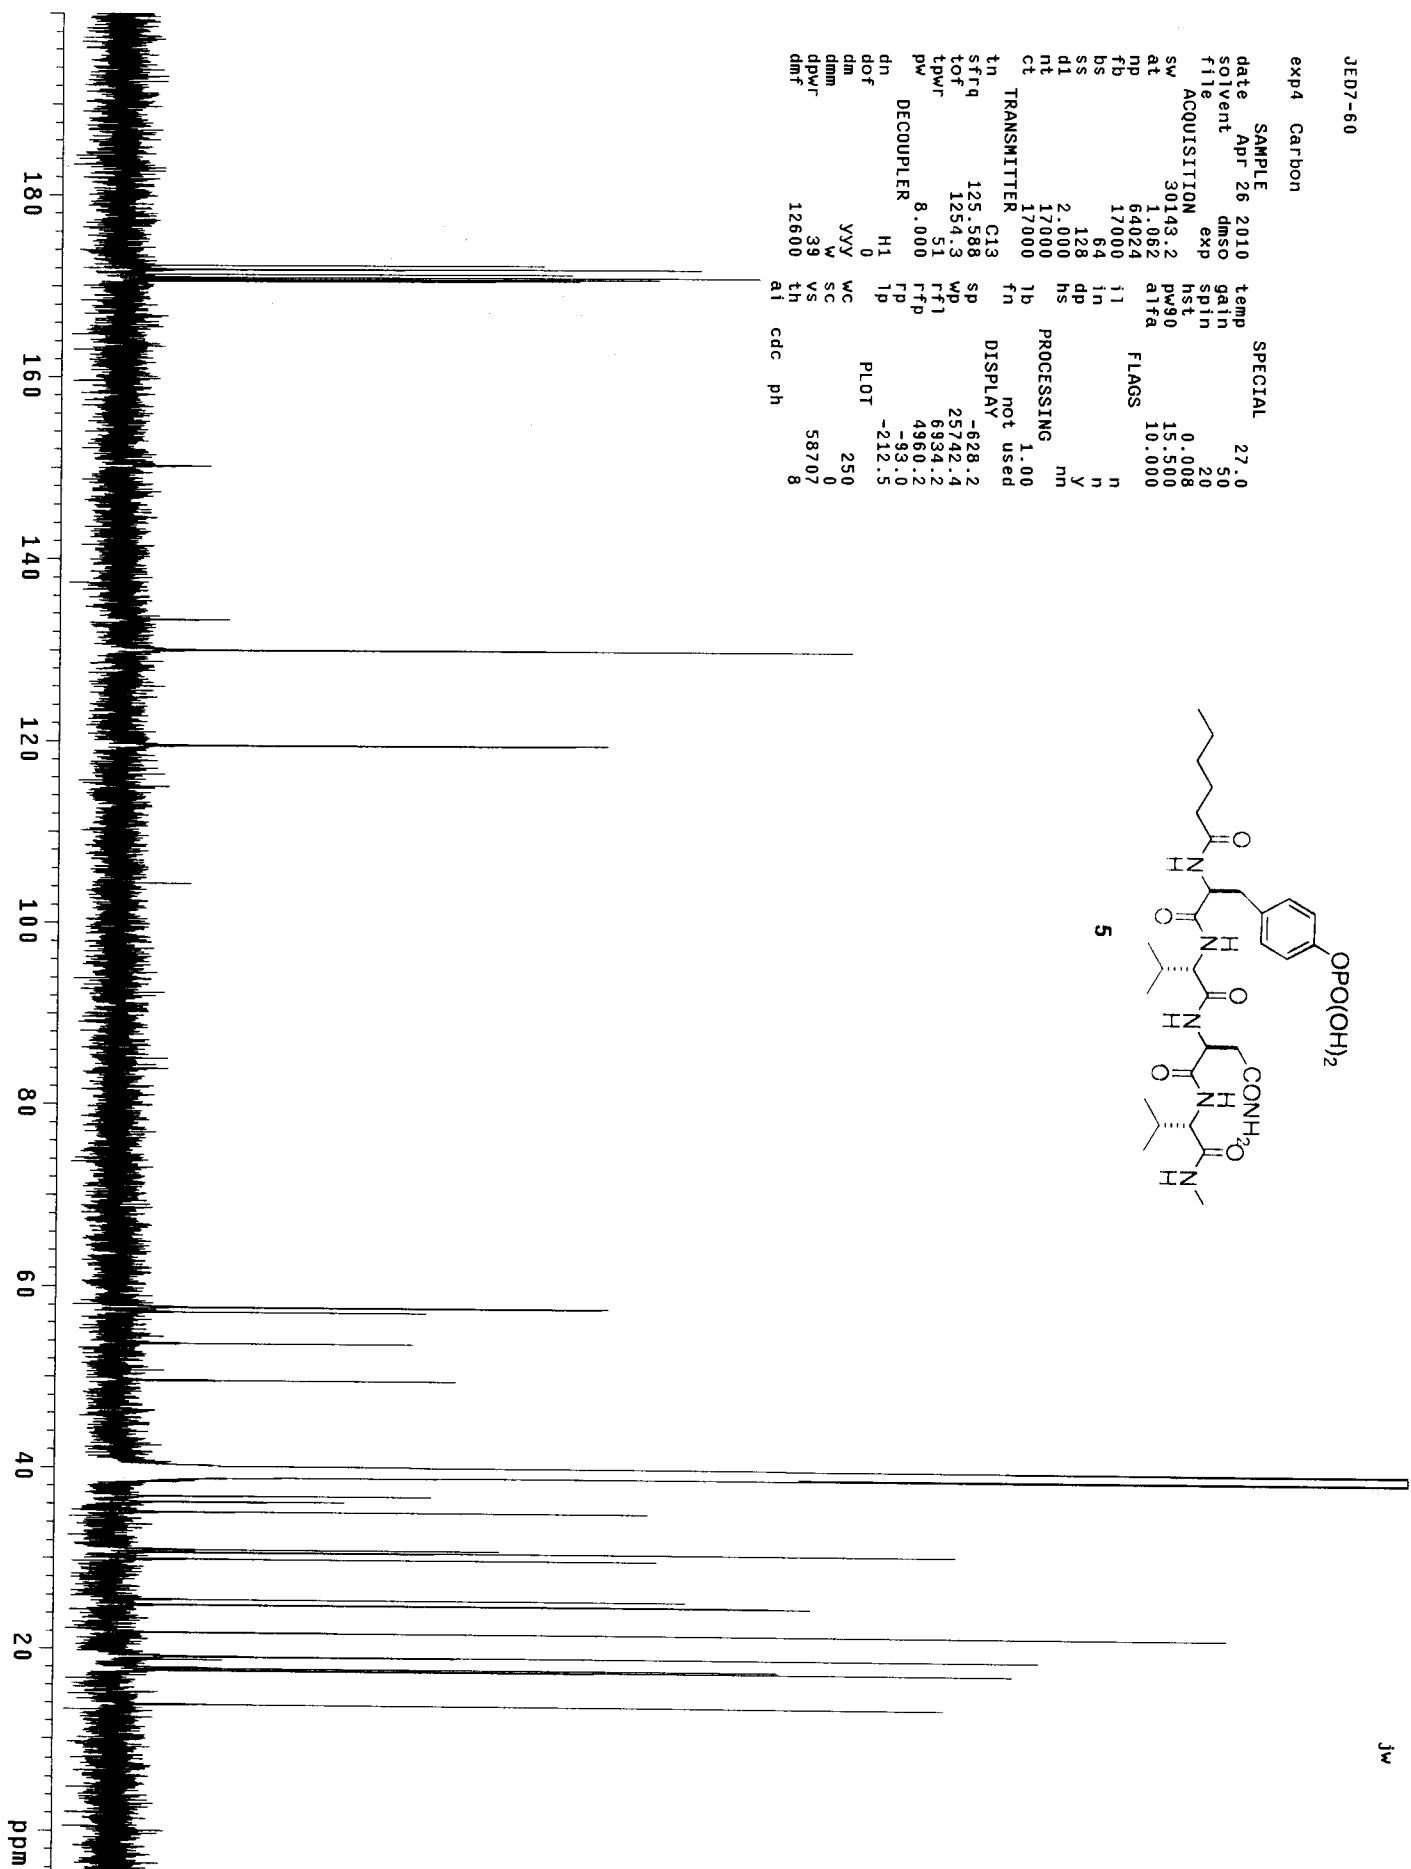

JEDIII-34  
jediii34\_h1

exp1 presat

| SAMPLE  |             | SATURATION |          |
|---------|-------------|------------|----------|
| date    | Dec 5 2006  | sspu1      | n        |
| solvent | cd3od       | satpwr     | -12      |
| file    | ACQUISITION | satfrq     | -69.8    |
| exp     | 499.870     | satdly     | 2.000    |
| sfreq   | 499.870     | satmode    | Ynm      |
| tn      | H1          | composite  | n        |
| at      | 3.996       | DEC. & VT  |          |
| np      | 73980       | dn         | H1       |
| sw      | 9256.0      | dof        | -69.8    |
| fb      | 5000        | dm         | nmn      |
| bs      | 32          | dmm        | c        |
| ss      | 2           | dmf        | 200      |
| tpwr    | 57          | dpwr       | 30       |
| pw      | 2.0         | temp       | 27.0     |
| di      | 0           | PROCESSING | 0.10     |
| tof     | 1124.6      | lb         | wtfile   |
| nt      | 64          | wtfile     |          |
| ct      | 64          | proc       | n        |
| atlock  | n           | fn         | not used |
| gain    | 30          | math       | f        |
| flags   |             |            |          |
| il      | n           | werr       | n        |
| in      | n           | wexp       | n        |
| dp      | y           | wbs        | y        |
| hs      | nm          | wnt        | nm       |
|         |             | DISPLAY    | wft      |
|         |             | sp         | -250.1   |
|         |             | wp         | 5248.5   |
|         |             | vs         | 477      |
|         |             | sc         | 0        |
|         |             | wc         | 250      |
|         |             | hzmm       | 20.99    |
|         |             | is         | 4384.62  |
|         |             | rfl        | 2667.5   |
|         |             | rflp       | 1649.6   |
|         |             | th         | 7        |
|         |             | ins        | 100.000  |
|         |             | ai         | cdc ph   |

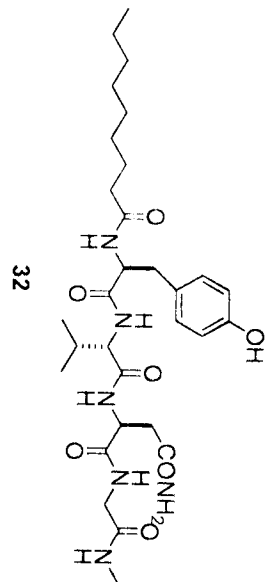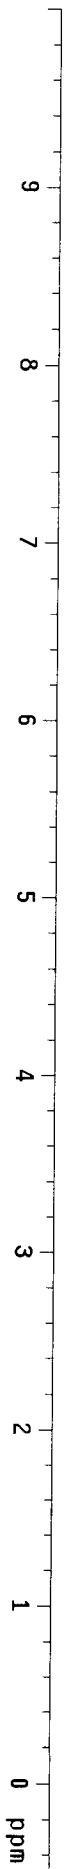

JEDIII-34  
jedIII34\_c13

exp4 szpun1

|             |            |            |          |
|-------------|------------|------------|----------|
| SAMPLE      | Dec 5 2006 | dfrrq      | 499.869  |
| SOlvent     | cd3od      | dn         | H1       |
| file        | exp        | dpwr       | 37       |
| ACQUISITION | 125.706    | dm         | 0        |
| sfrrq       | C13        | dmm        | YYY      |
| tn          | 1.279      | dmf        | W        |
| dt          | 85262      | dseq       | 10582    |
| np          | 33333.3    | dres       | 1.0      |
| sw          | not used   | homo       | n        |
| fb          | 64         | temp       | 27.0     |
| bs          | 53         | PROCESSING | 1.00     |
| tpwr        | 3.0        | lb         |          |
| pw          | 2.000      | wtfile     |          |
| di          | 2198.1     | proc       | ft       |
| tof         | 10000      | fn         | not used |
| nt          | 10000      | math       | f        |
| ct          | 50         | weff       |          |
| alock       | 50         | wexp       |          |
| gain        | 50         | wbs        |          |
| FLAGS       |            | wrt        |          |
| il          | n          |            |          |
| in          | n          |            |          |
| dp          | y          |            |          |
| ns          | nm         |            |          |

  

|         |         |
|---------|---------|
| DISPLAY | -628.7  |
| sp      | 25766.5 |
| wp      | 11298   |
| vs      | 0       |
| sc      | 250     |
| wc      | 103.07  |
| hzmm    | 500.00  |
| is      | 8538.8  |
| lfl     | 6158.9  |
| rfd     | 68      |
| th      | 100.000 |
| ins     |         |
| at      | cdc     |
| ph      |         |

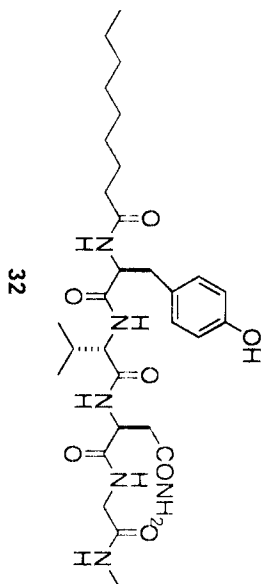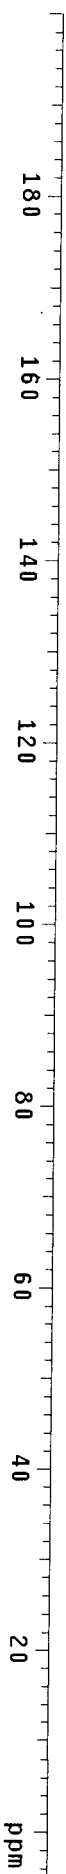

JEDIII-41  
jediii41\_h1

expt1 presat

|             |            |             |             |
|-------------|------------|-------------|-------------|
| date        | Dec 6 2006 | SAMPLE      | JEDIII-41   |
| solvent     | cd3od      | solvent     | cd3od       |
| file        | exp        | file        | jediii41_h1 |
| ACQUISITION |            | ACQUISITION |             |
| sfrq        | 499.870    | sfrq        | 499.870     |
| tn          | H1         | tn          | H1          |
| at          |            | at          |             |
| mp          | 3.996      | mp          | 3.996       |
| sw          | 73980      | sw          | 73980       |
| fb          | 9256.0     | fb          | 9256.0      |
| bs          | 5000       | bs          | 5000        |
| ss          | 32         | ss          | 32          |
| tpwr        | 2          | tpwr        | 2           |
| pw          | 57         | pw          | 57          |
| dl          | 2.0        | dl          | 2.0         |
| tof         | 0          | tof         | 0           |
| nt          | 1124.6     | nt          | 1124.6      |
| ct          | 64         | ct          | 64          |
| alock       | 64         | alock       | 64          |
| gain        | 30         | gain        | 30          |
| FLAGS       |            | FLAGS       |             |
| il          | n          | il          | n           |
| in          | n          | in          | n           |
| dp          | y          | dp          | y           |
| hs          | nm         | hs          | nm          |
| sspu1       |            | sspu1       |             |
| satpr       |            | satpr       |             |
| satfrq      |            | satfrq      |             |
| satdly      |            | satdly      |             |
| satmode     |            | satmode     |             |
| composit    |            | composit    |             |
| DEC. & VT   |            | DEC. & VT   |             |
| dn          | H1         | dn          | H1          |
| dof         | -67.8      | dof         | -67.8       |
| dm          | nm         | dm          | nm          |
| dmm         | c          | dmm         | c           |
| dmf         | 200        | dmf         | 200         |
| dpwr        | 30         | dpwr        | 30          |
| temp        | 27.0       | temp        | 27.0        |
| PROCESSING  |            | PROCESSING  |             |
| lb          | 0.10       | lb          | 0.10        |
| wtfile      |            | wtfile      |             |
| proc        |            | proc        |             |
| fn          | not used   | fn          | not used    |
| math        | f          | math        | f           |
| werr        | n          | werr        | n           |
| wexp        | n          | wexp        | n           |
| wds         | y          | wds         | y           |
| wnt         | nm         | wnt         | nm          |
| DISPLAY     |            | DISPLAY     |             |
| sp          | -250.1     | sp          | -250.1      |
| wp          | 5248.5     | wp          | 5248.5      |
| vs          | 1193       | vs          | 1193        |
| sc          | 0          | sc          | 0           |
| wc          | 250        | wc          | 250         |
| hzm         | 20.99      | hzm         | 20.99       |
| is          | 4239.98    | is          | 4239.98     |
| rfl         | 1018.1     | rfl         | 1018.1      |
| rffp        | 0          | rffp        | 0           |
| th          | 7          | th          | 7           |
| ins         | 1.000      | ins         | 1.000       |
| ai          | cdc        | ai          | cdc         |
| ph          |            | ph          |             |

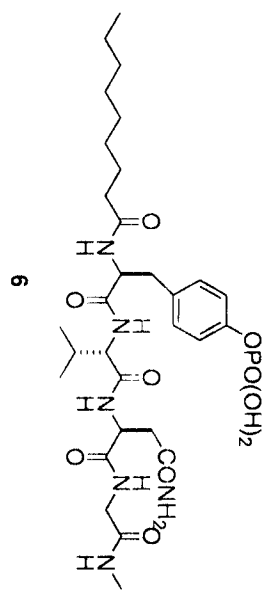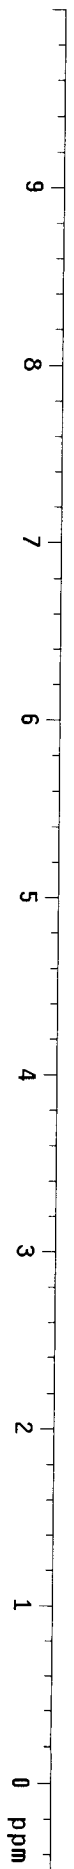

JEDIII-41  
jediii41\_c13

exp4 s2pu1

SAMPLE DEC. & VT

date Dec 6 2006 dfrq 499.869

solvent cd3od dn H1

file exp dpwr 37

ACQUISITION dof 0

sfrq 125.706 dm YYY

tn C13 dmm W

at 1.279 dmf 10582

np 85262 dseq

sw 33333.3 dres 1.0

fb not used homo n

bs 64 temp 27.0

tpwr 53 PROCESSING 1.00

pw 3.0 lb wtfile

dl 2.000 proc ft

tof 2198.1 fn math not used f

nt 7000

ct 7000

alock n

gain 60

FLAGS

fl n

in n

dp y

hs mn

DISPLAY

sp -628.7

wp 25766.5

vs 12819

WC 0

SC 250

h2mm 103.07

is 500.00

rfl 8538.8

rfp 6138.3

th 68

ins 100.000

ai cdc ph

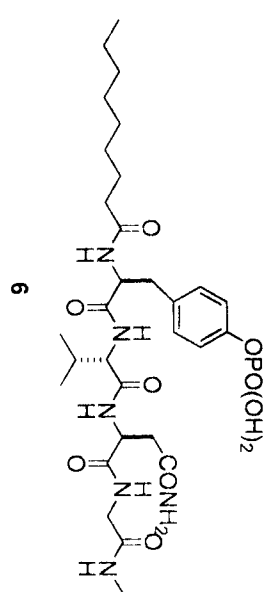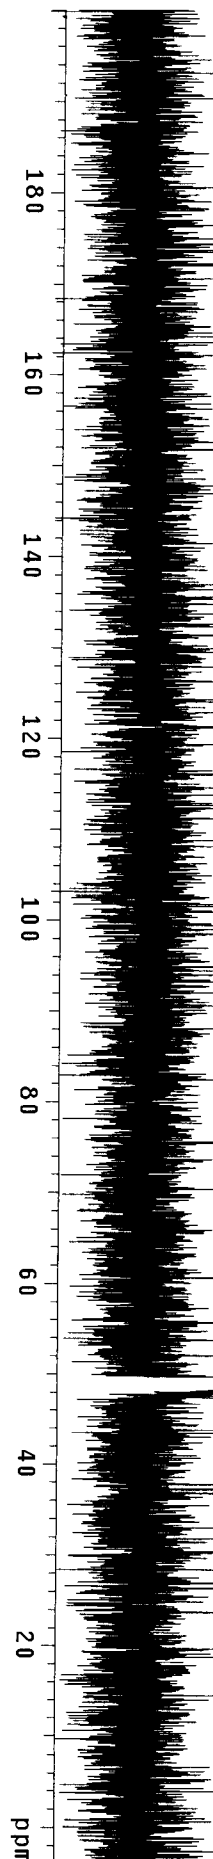

expl s2pu1

SAMPLE DEC. & VT 499.349  
 date Aug 18 2006 dfrq H1  
 solvent CDCl3 dn H1  
 file ACQUISITION exp 30  
 ACQUISITION 0  
 sfrq 499.350 dm nnn  
 tn H1 dm C  
 at 4.865 dmf 200  
 np 89888 dseq  
 sw 9237.9 dres 1.0  
 fb 5000 homo n  
 bs 32 temp 27.0  
 ss 4 PROCESSING 0.10  
 tpwr 54 lb wfile  
 pw 2.0 wfile  
 dl 2.000 proc ft  
 tof 1123.4 fn not used  
 nt 64 math f  
 ct 64  
 alock n  
 gain 40 werr  
 flags n wexp  
 il n wbs  
 in n wnt  
 dp y  
 hs mh

DISPLAY  
 sp -249.8  
 wd 5243.1  
 vs 55  
 sc 0  
 wc 250  
 hzmm 20.97  
 ls 1623.28  
 rfi 1005.7  
 rfp 0  
 th 3  
 ins 1.000  
 ai cdc ph

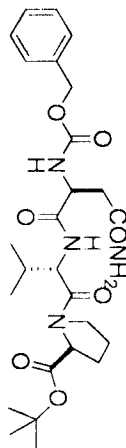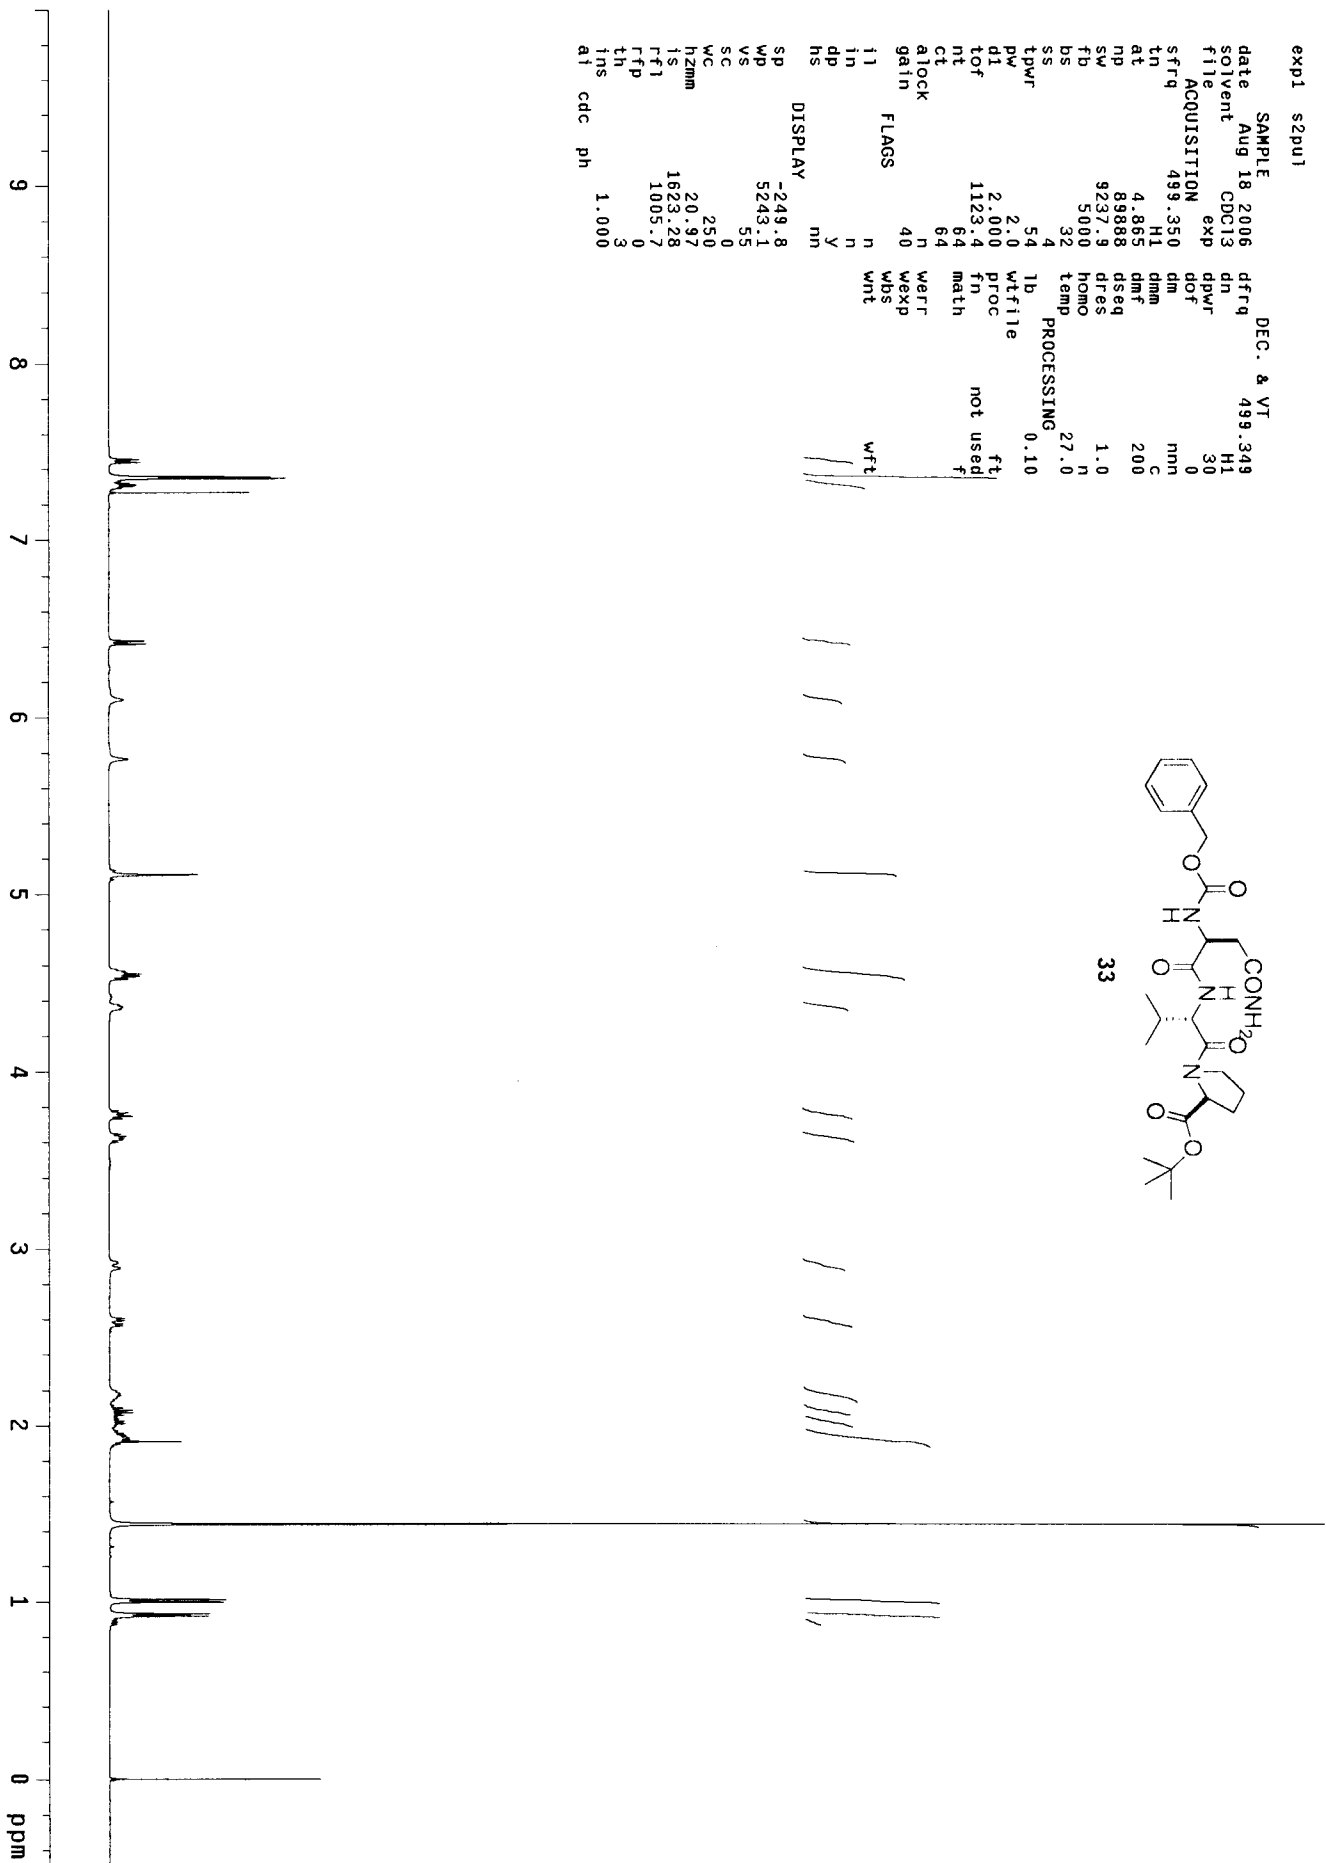



JEDII-218

exp4 s2pu1

SAMPLE DEC. 8 VT

date 18 2006 499.349

solvent Aug CDC13 H1

file exp CDC13 44

ACQUISITION dpwr -500.0

sfrq 125.580 dof YYY

tn C13 dmm 11000

at 1.073 dmf W

np 102792 dseq 1.0

sw 50213.7 dres 1.0

fb 28000 homo 27.0

bs 128 temp 2.00

ss 54 lb wtfile

tpwr 3.0 math

pw 2.000 proc ft

dl 6904.3 fn not used

tof 1000 math

nt 1000 math

cl 1000 math

alock n werr

gain 50 wexp

fl n wbs

in n wnt

dp Y

hs mn

DISPLAY

sp -628.4

wp 25739.7

vs 428

sc 0

wc 250

hzm 102.36

is 90000.00

rf1 6305.1

rfp 0

th 10

ins 100.000

nm cdc ph

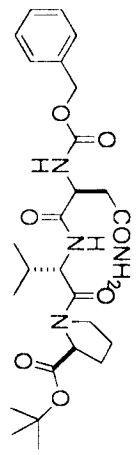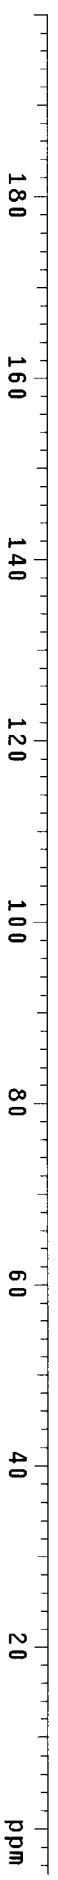

Archive directory:  
Sample directory:

Pulse Sequence: s2pu1

Solvent: cdcl3

Temp: 27.0 C / 300.1 K

File: martin\_jed2-220\_s2pu1\_H1

INDVA-500 "nmrfred"

Relax. delay 2.000 sec

Pulse 30.0 degrees

Acq. time 4.049 sec

Width 6410.3 Hz

32 Repetitions

OBSERVE H1, 399.8047051 MHz

DATA PROCESSING

Line broadening 0.1 Hz

FT size 65536

Total time 3 min, 25 sec

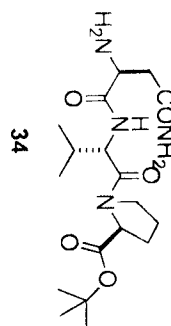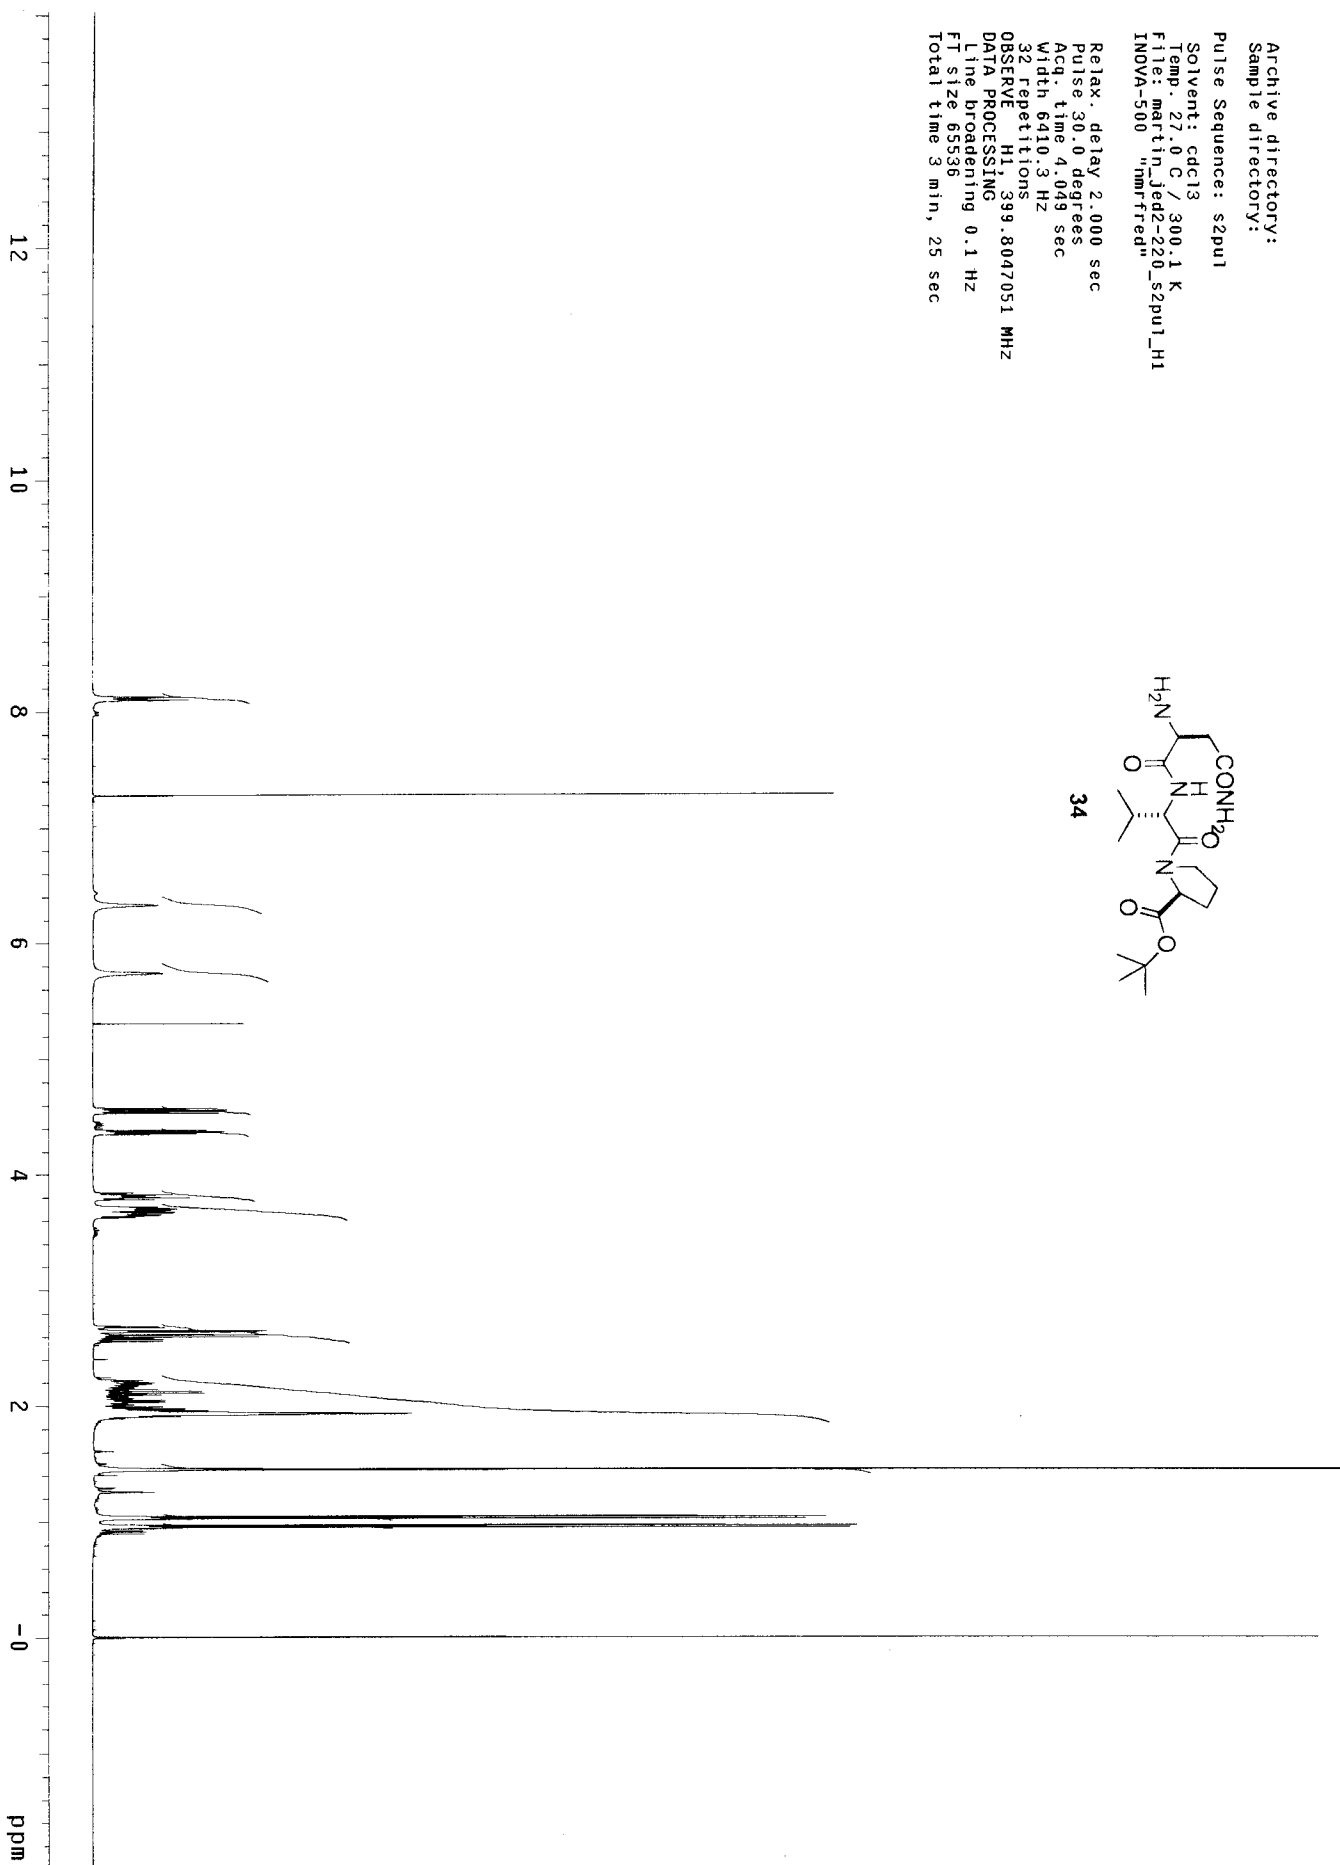

Automation directory: /export/home/staffw/vnmr/sys/data/auto\_2006.08.18  
File : martin\_jed2-220\_s2pu1\_02  
Sample id : s-20060818\_47\_01  
Sample : jed2-220

Pulse Sequence: s2pu1

Solvent: cdcl3  
Temp: 27.0 C / 300.1 K  
Sample #47, Operator: martin  
File: martin\_jed2-220\_s2pu1\_02  
VNMRS-400 "nmrcoho"

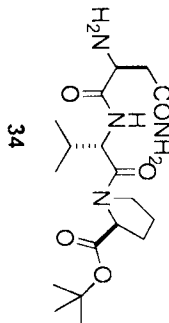

Relax. delay 2.000 sec  
Pulse 30.0 degrees  
Acq. time 1.300 sec  
Width 24509.8 Hz  
512 Repetitions  
OBSERVE C13, 100.5309507 MHz  
DECUPLE H1, 399.8067108 MHz  
Power 43 db  
continously on  
WALTZ-16 modulated  
DATA PROCESSING  
Line broadening 1.0 Hz  
FT size 65536  
Total time 28 min, 14 sec

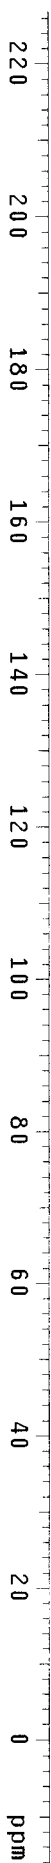

Archive directory:  
Sample directory:

Pulse Sequence: s2pu1

Solvent: cdcl3  
Temp: 27.0 C / 300.1 K  
File: martin\_led2-221\_s2pu1\_H1  
INOVA-500 "nmr1red"

Relax. delay 2.000 sec  
Pulse: 30.0 degrees  
Acq. time 4.043 sec  
Width 6410.3 Hz  
64 repetitions  
OBSERVE H1, 399.8047084 MHz  
DATA PROCESSING  
Line broadening 0.1 Hz  
FT size 65536  
Total time 6 min, 39 sec

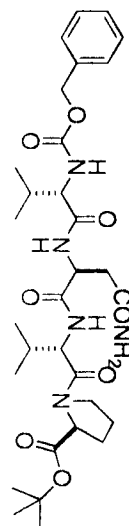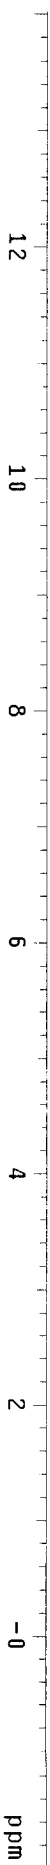

Automation directory: /export/home/staffw/vnmr-sys/data/2006/08/21  
File: martin\_jed2-221\_s2pu1\_02  
Sample id: S-20060821\_4\_01  
Sample: jed2-221

Pulse Sequence: s2pu1  
Solvent: cdcl3  
Temp: 27.0 C / 300.1 K  
Sample #4, Operator: martin  
File: martin\_jed2-221\_s2pu1\_02  
VNMRS-400 "nmrRobo"

Relax. delay 2.000 sec  
Pulse 30.0 degrees  
Acq. time 1.300 sec  
Width 24509.8 Hz  
1000 repetitions  
OBSERVE C13, 100.5309733 MHz  
DECUPLE H1, 399.8067108 MHz  
Power 43 dB  
Continuously ON  
WALTZ-16 modulated  
DATA PROCESSING  
Line broadening 1.0 Hz  
Ft size 65536  
Total time 55 min, 9 sec

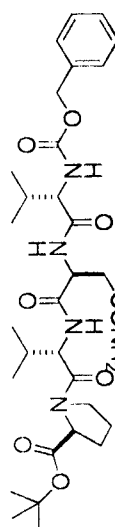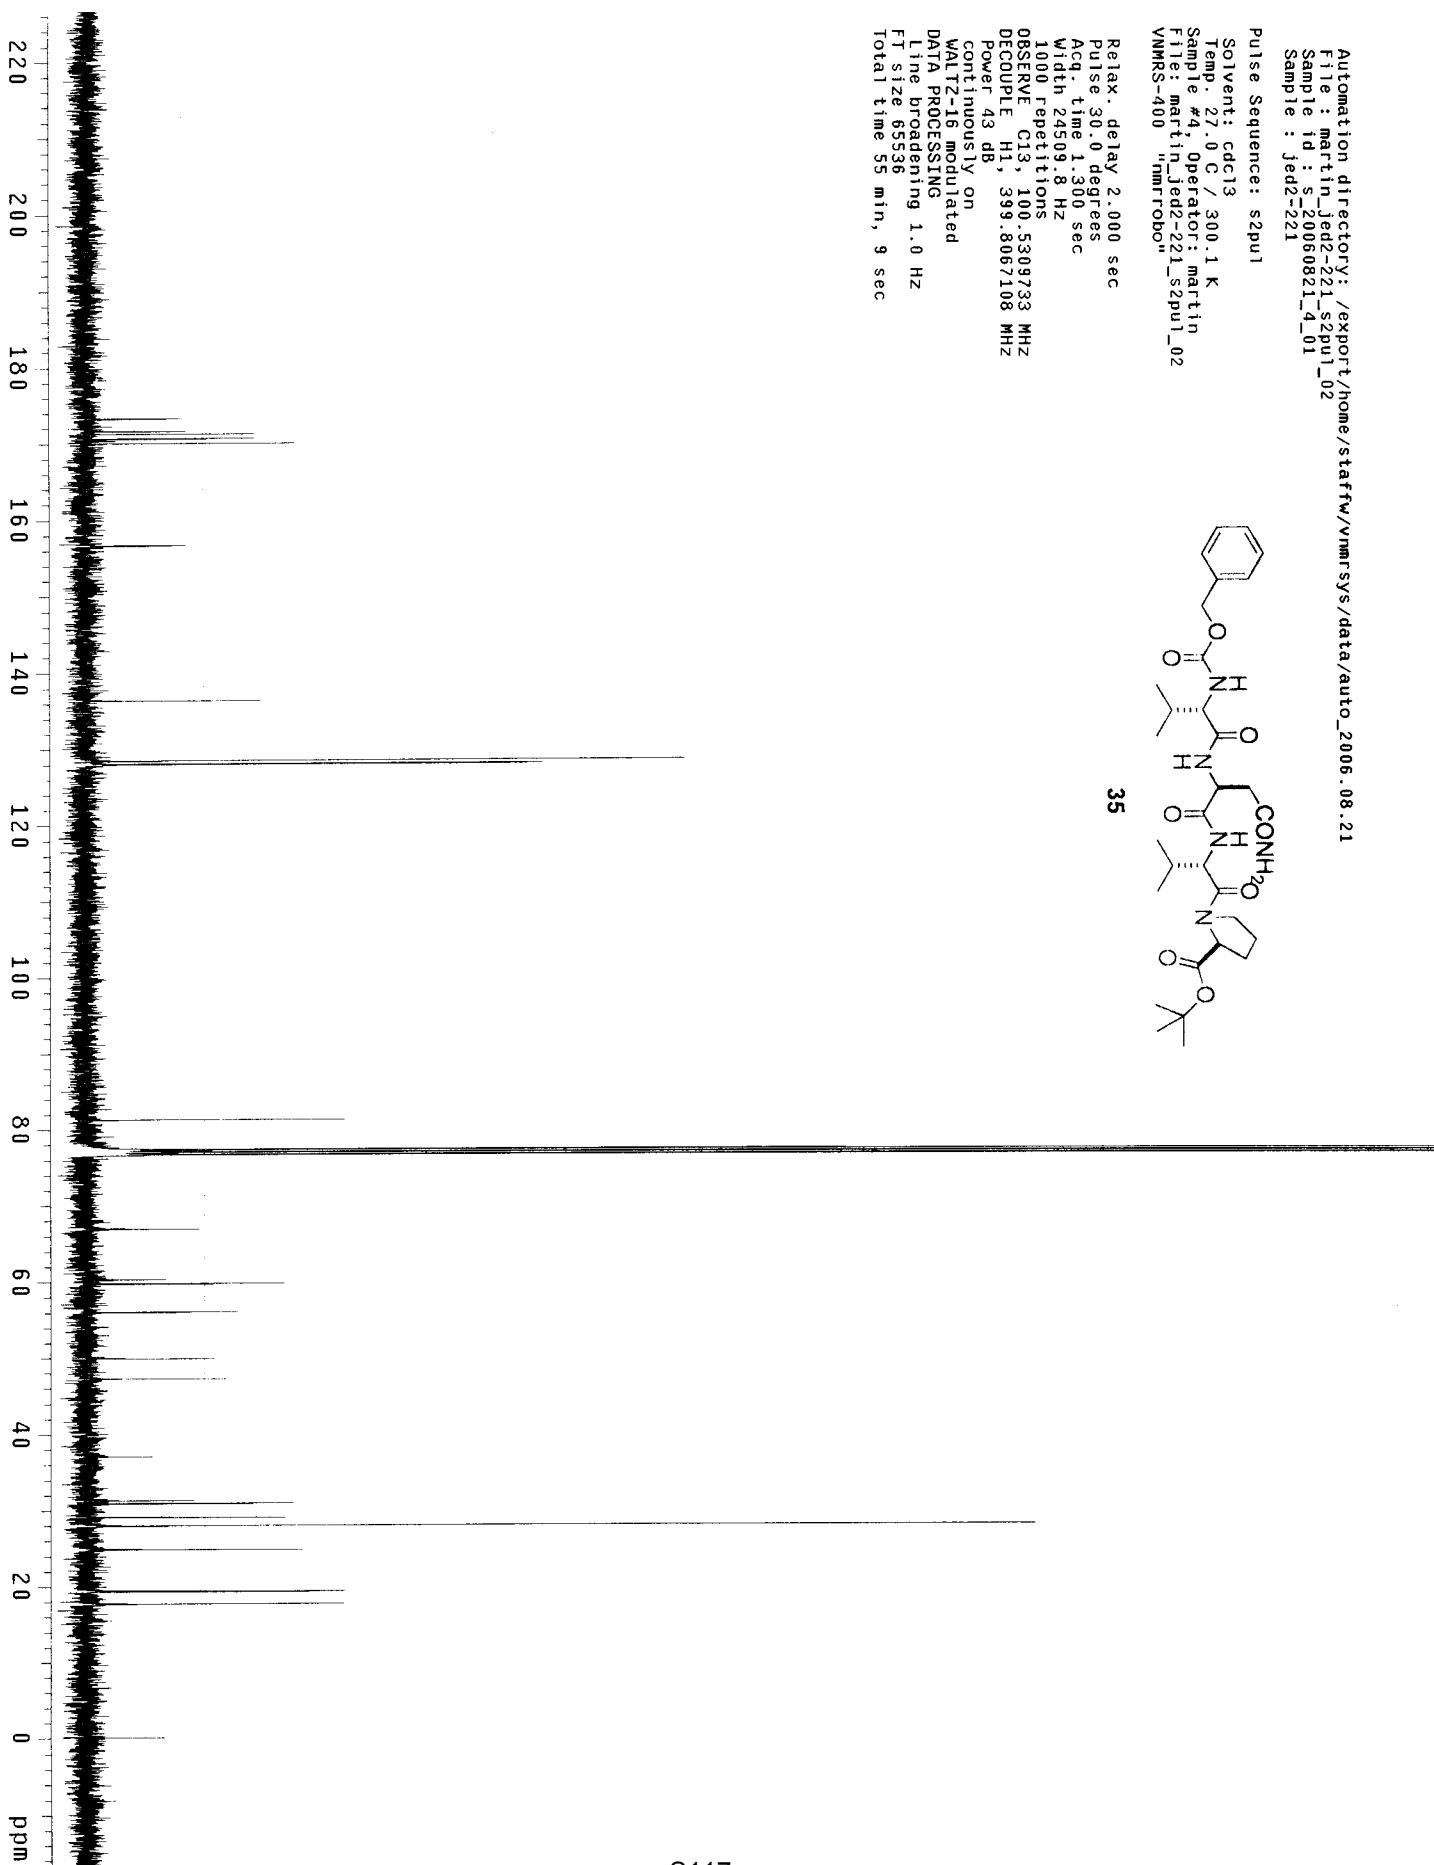

Archive directory:  
Sample directory:

Pulse Sequence: s2pul1  
Solvent: cd3od  
Temp: 27.0 C / 300.1 K  
File: martin\_jed2-223\_1\_s2pul1\_H1  
INOVA-500 "nmrFtdr"

Relax. delay 2.000 sec  
Pulse 30.0 degrees  
Acq. time 4.049 sec  
Width 6410.3 Hz  
64 repetitions

OBSERVE H1, 399.8062867 MHz  
DATA PROCESSING  
Line broadening 0.1 Hz  
FT size 65536  
Total time 6 min, 39 sec

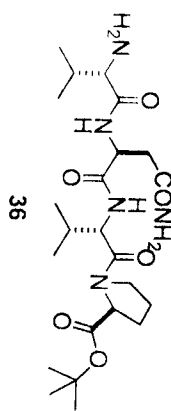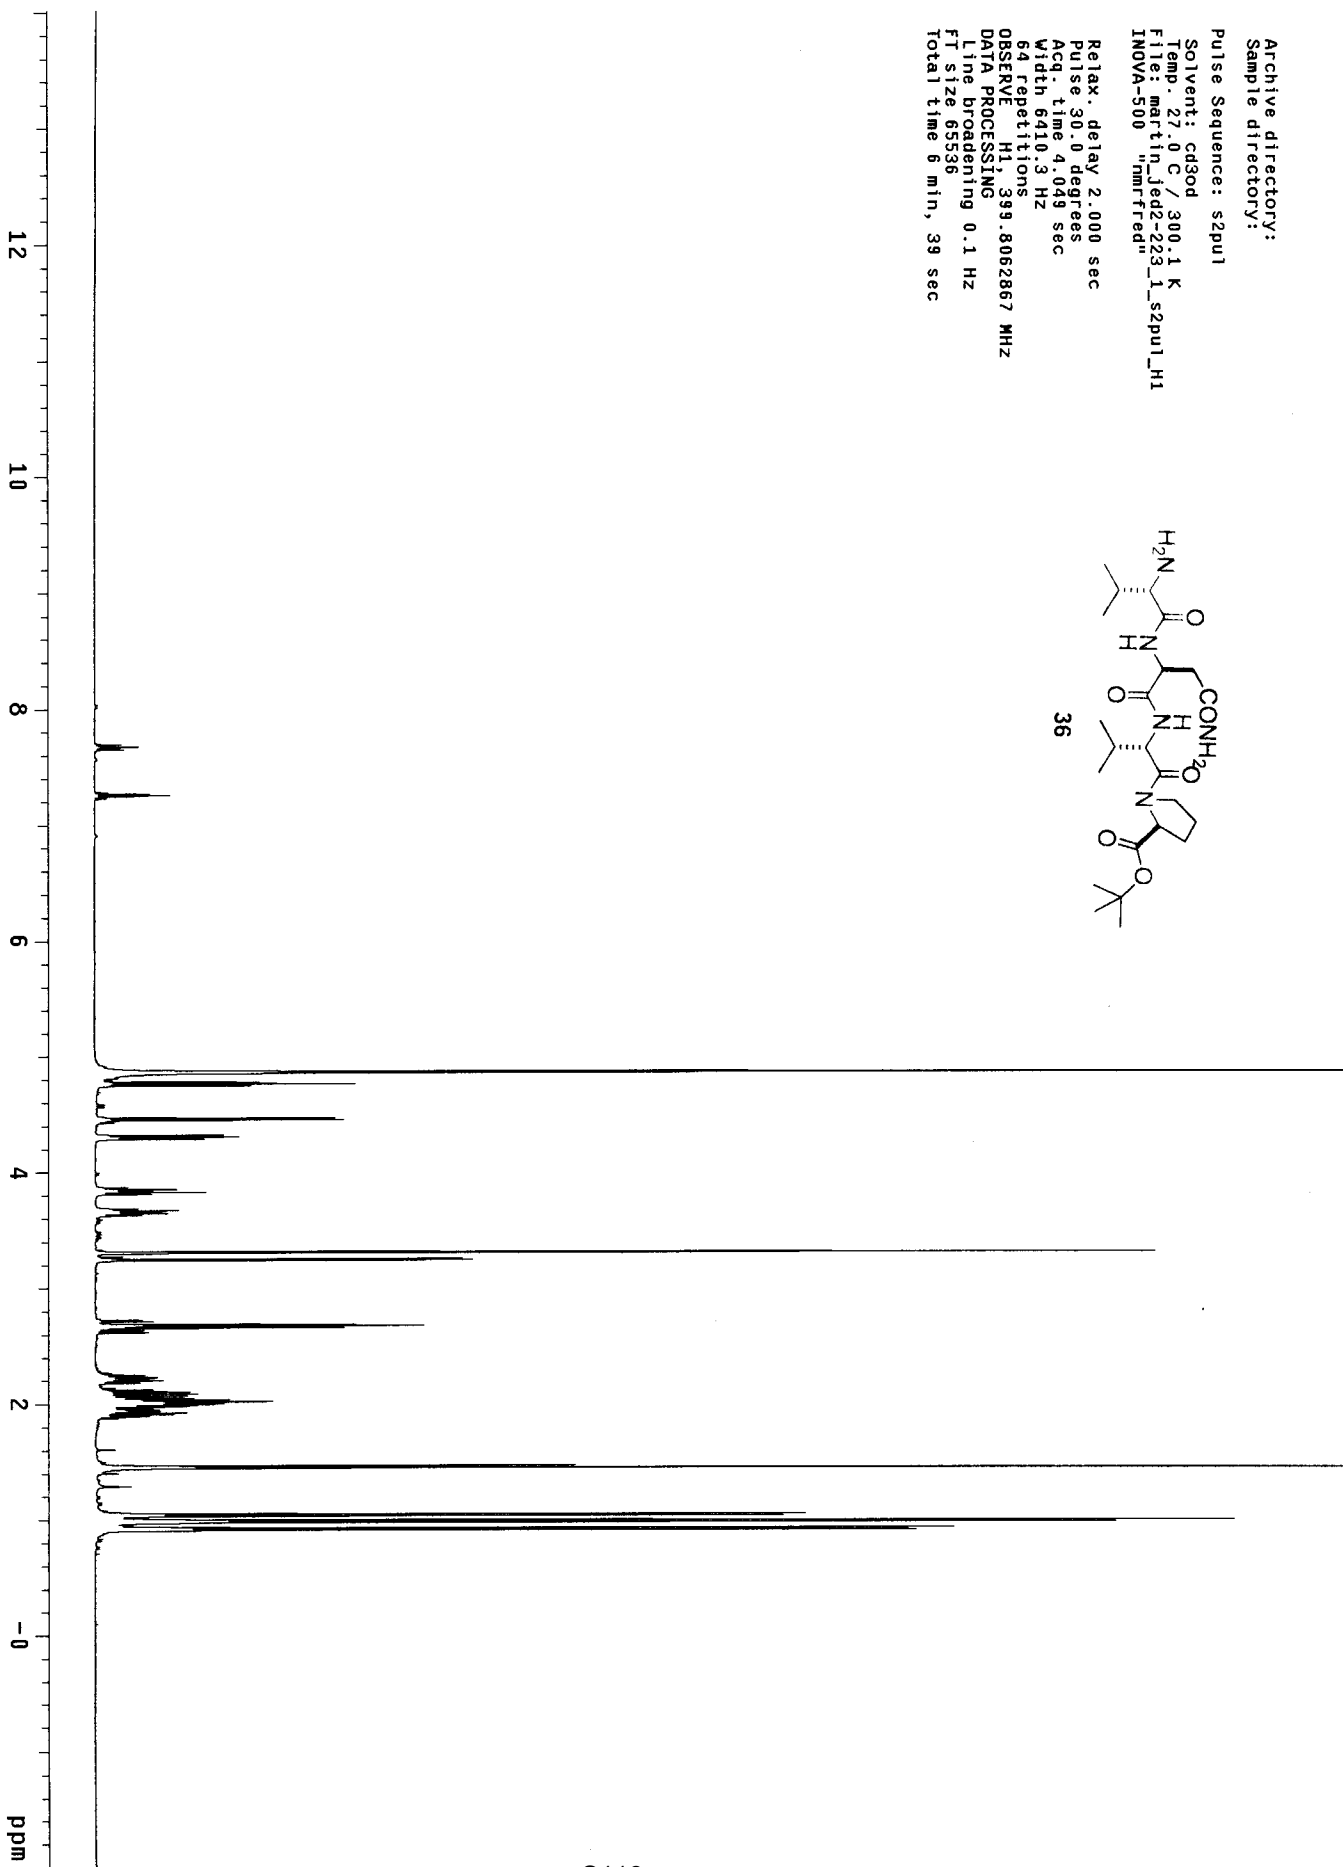

Automation directory: /export/home/staffw/vnmr/sys/data/auto\_2006.08.22  
File : martin\_jed2-223\_1\_s2pu1\_02  
Sample id : S-20060822-7\_02  
Sample : jed2-223\_1

Pulse Sequence: s2pu1  
Solvent: cd3od  
Temp: 27.0 C / 300.1 K  
Sample #: 7, Operator: martin  
File: martin\_jed2-223\_1\_s2pu1\_02  
VNMRS-400 "marco"bo"

Relax. delay 2.000 sec  
Pulse 30.0 degrees  
Acq. time 1.300 sec  
Width 24509.8 Hz  
1000 repetitions  
OBSERVE C13, 100.5313468 MHz  
DECUPLE H1, 399.8082860 MHz  
Power 43 db  
continuously on  
WALTZ-16 modulated  
DATA PROCESSING  
Line broadening 1.0 Hz  
FT size 65536  
Total time 55 min, 9 sec

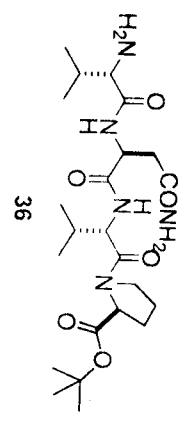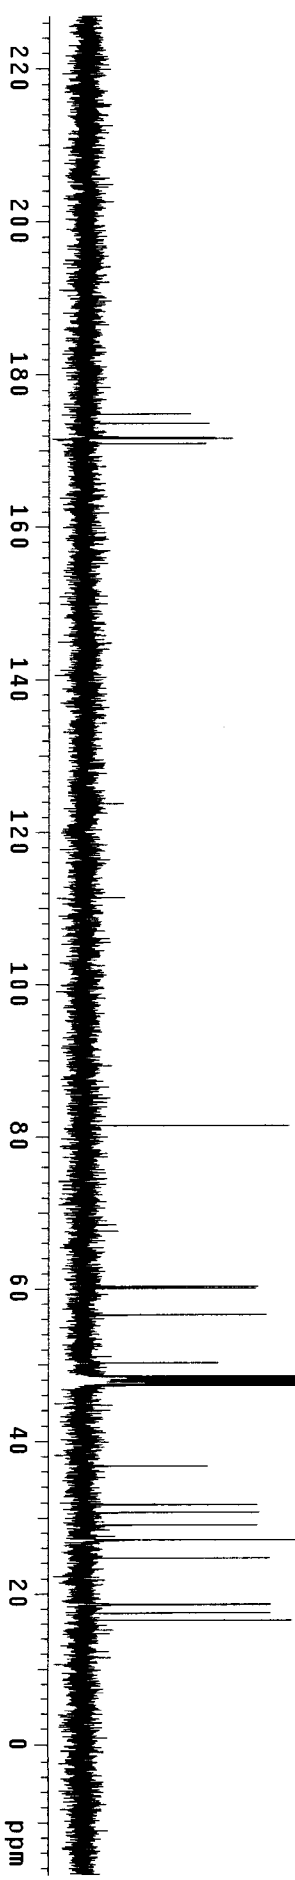

JEDI(225)-8/22/06

Pulse Sequence: s2pu1

Solvent: CD3OD

Ambient temperature

Mercury-400BB "hmr6"

Relax. delay 2.000 sec

Pulse 16.4 degrees

Acq. time 2.856 sec

Width 5602.2 Hz

24 repetitions

OBSERVE H1 400.2685554 MHz

DATA PROCESSING

Line broadening 0.1 Hz

FT size 32768

Total time 0 min, 0 sec

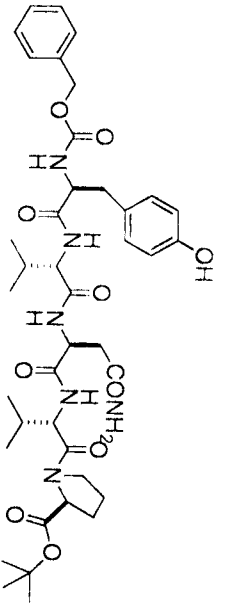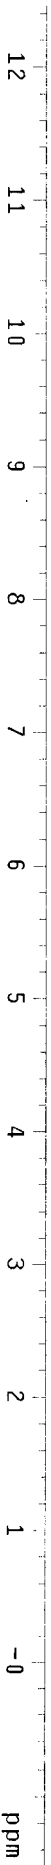



Archive directory:  
Sample directory:

Pulse Sequence: s2pul1

Solvent: cd3od

Temp. 27.0 C / 300.1 K

User: 1-14-87

File: martin\_jed2-225\_s2pul1\_c13

INOVA-500 "nmr1red"

Relax. delay 2.000 sec

Pulse 30.0 degrees

Acq. time 1.500 sec

Width 24509.8 Hz

5000 repetitions

OBSERVE C13, 100.5312290 MHz

DECUPLE H1, 399.8082850 MHz

Power 44 dB

continuously on

WALTZ-16 modulated

DATA PROCESSING

Line broadening 1.0 Hz

FT size 65536

Total time 4 hr, 35 min, 47 sec

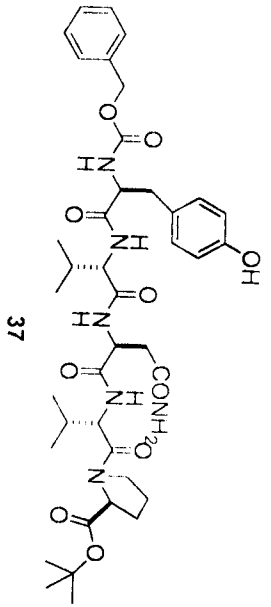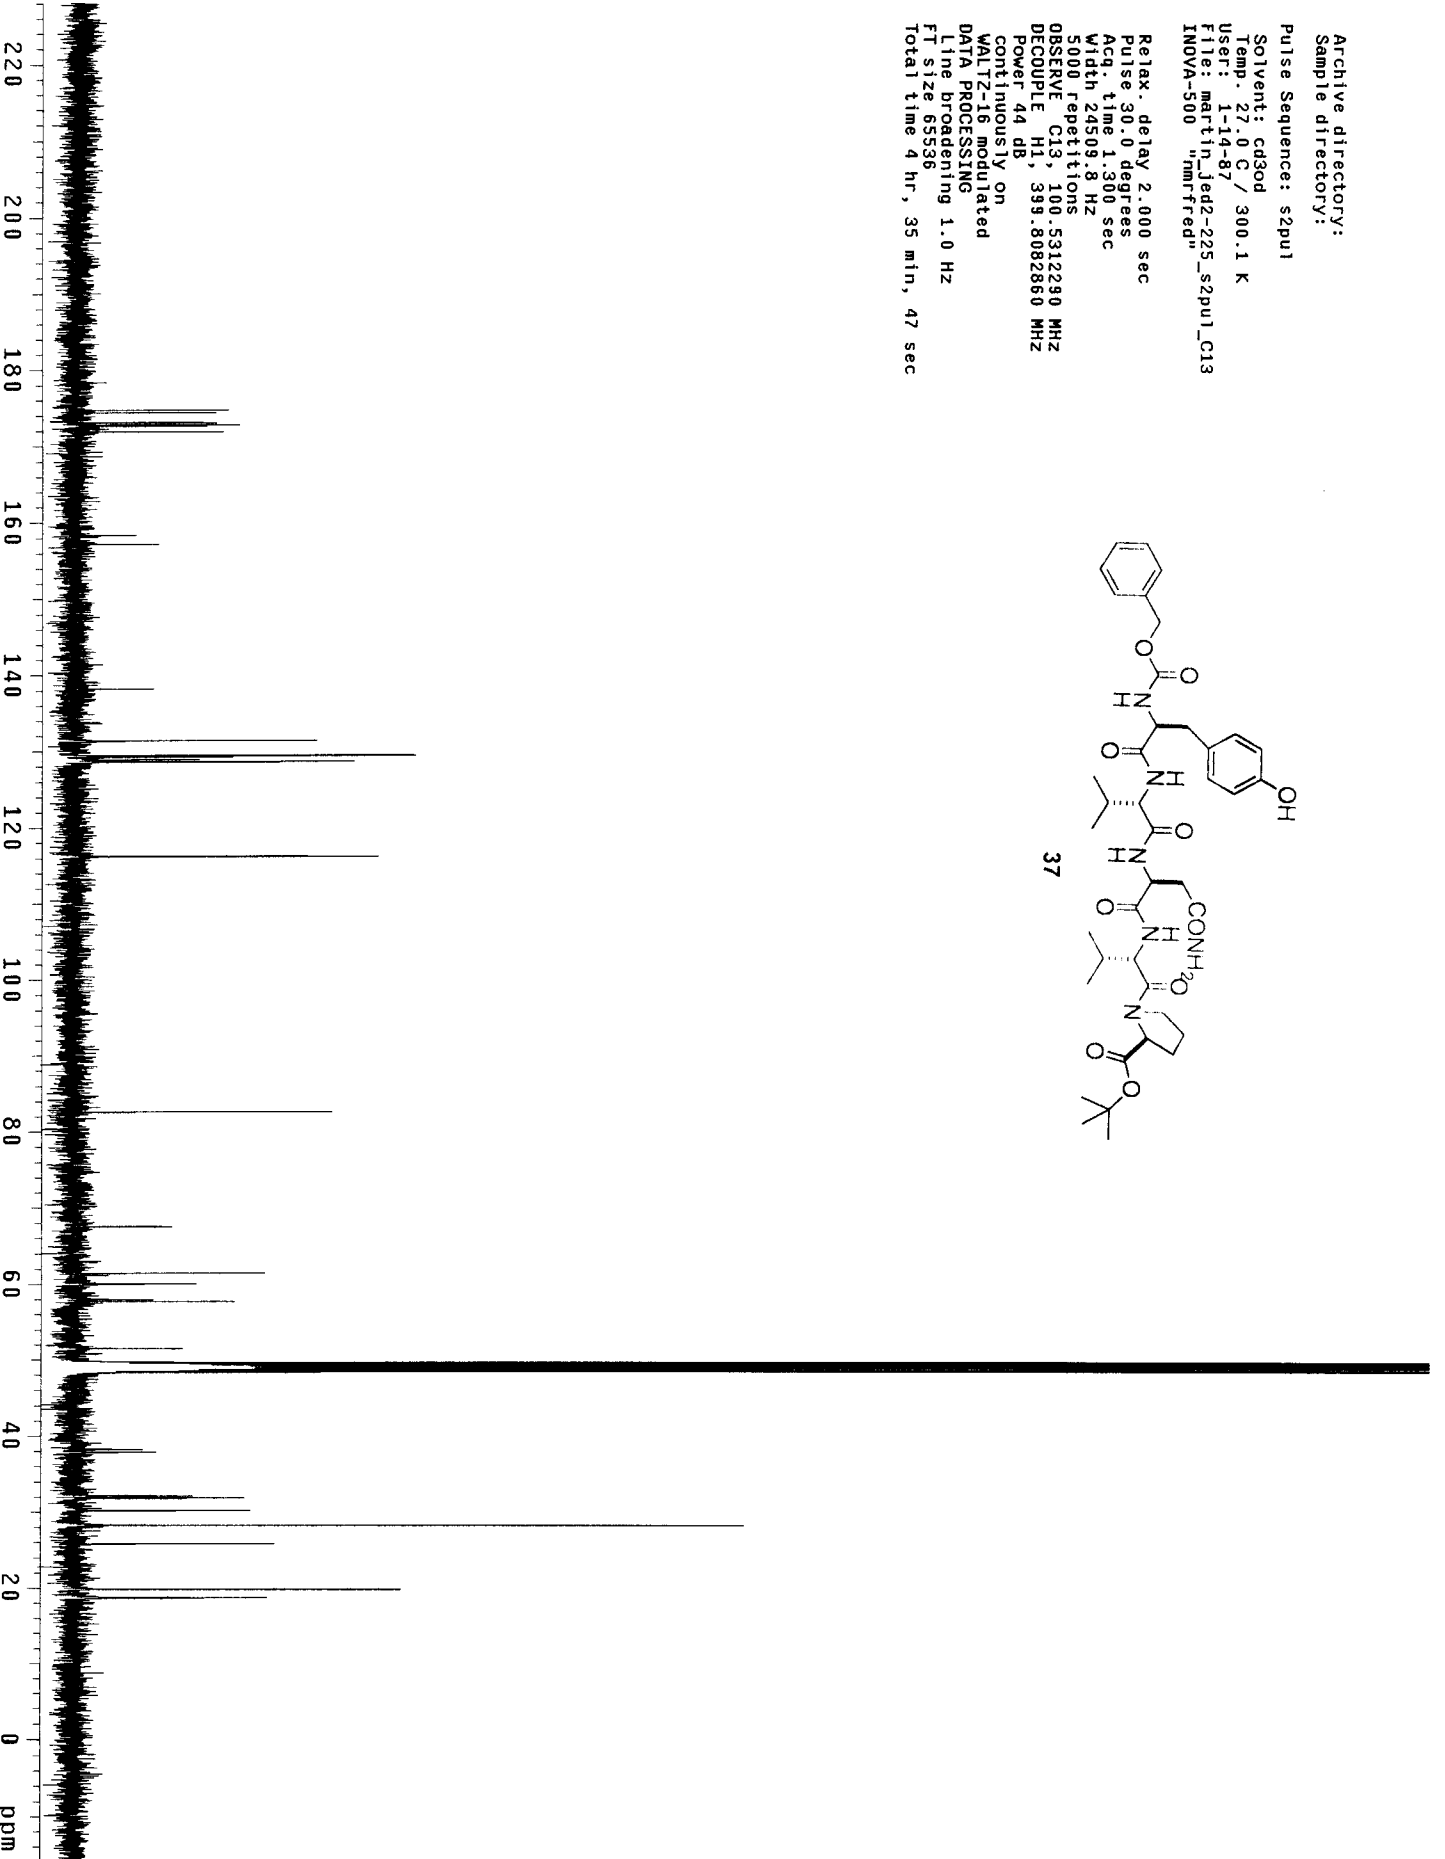

JEDI1-227

expt s2pu1

|         |             |             |       |            |         |
|---------|-------------|-------------|-------|------------|---------|
| date    | SAMPLE      | Aug 29 2006 | dfrrq | DEC. & VT  | 499.351 |
| solvent | cd3od       | exp         | dn    | H1         | 30      |
| file    | ACQUISITION | 499.352     | dpwr  | H1         | 0       |
| sfrq    | 499.352     | dm          | dotf  | nmr        | 0       |
| tn      | H1          | dm          | dm    | nmr        | 200     |
| at      | 4.865       | dmf         | dresq | nmr        | 1.0     |
| np      | 89888       | dresq       | homo  | nmr        | 1.0     |
| sw      | 9237.9      | temp        | temp  | PROCESsing | 27.0    |
| fb      | 5000        | 4           | 1b    | 0.10       |         |
| ss      | 54          | 2.0         | wfite | ft         |         |
| tpwr    | 2.00        | 1123.4      | proc  | not used   | f       |
| pw      | 1123.4      | math        | werr  | wft        |         |
| d1      | 64          | wexp        | wbs   |            |         |
| nt      | 64          | wnt         |       |            |         |
| ct      | 64          |             |       |            |         |
| alock   | n           |             |       |            |         |
| gain    | 40          |             |       |            |         |
| ll      | n           |             |       |            |         |
| in      | n           |             |       |            |         |
| dp      | y           |             |       |            |         |
| hs      | mn          |             |       |            |         |

DISPLAY -249.7  
 -5243.1  
 79  
 0  
 250  
 20.97  
 2658.64  
 2659.6  
 1647.9  
 3  
 1.000  
 ai cdc ph

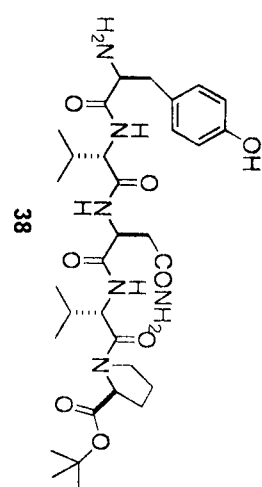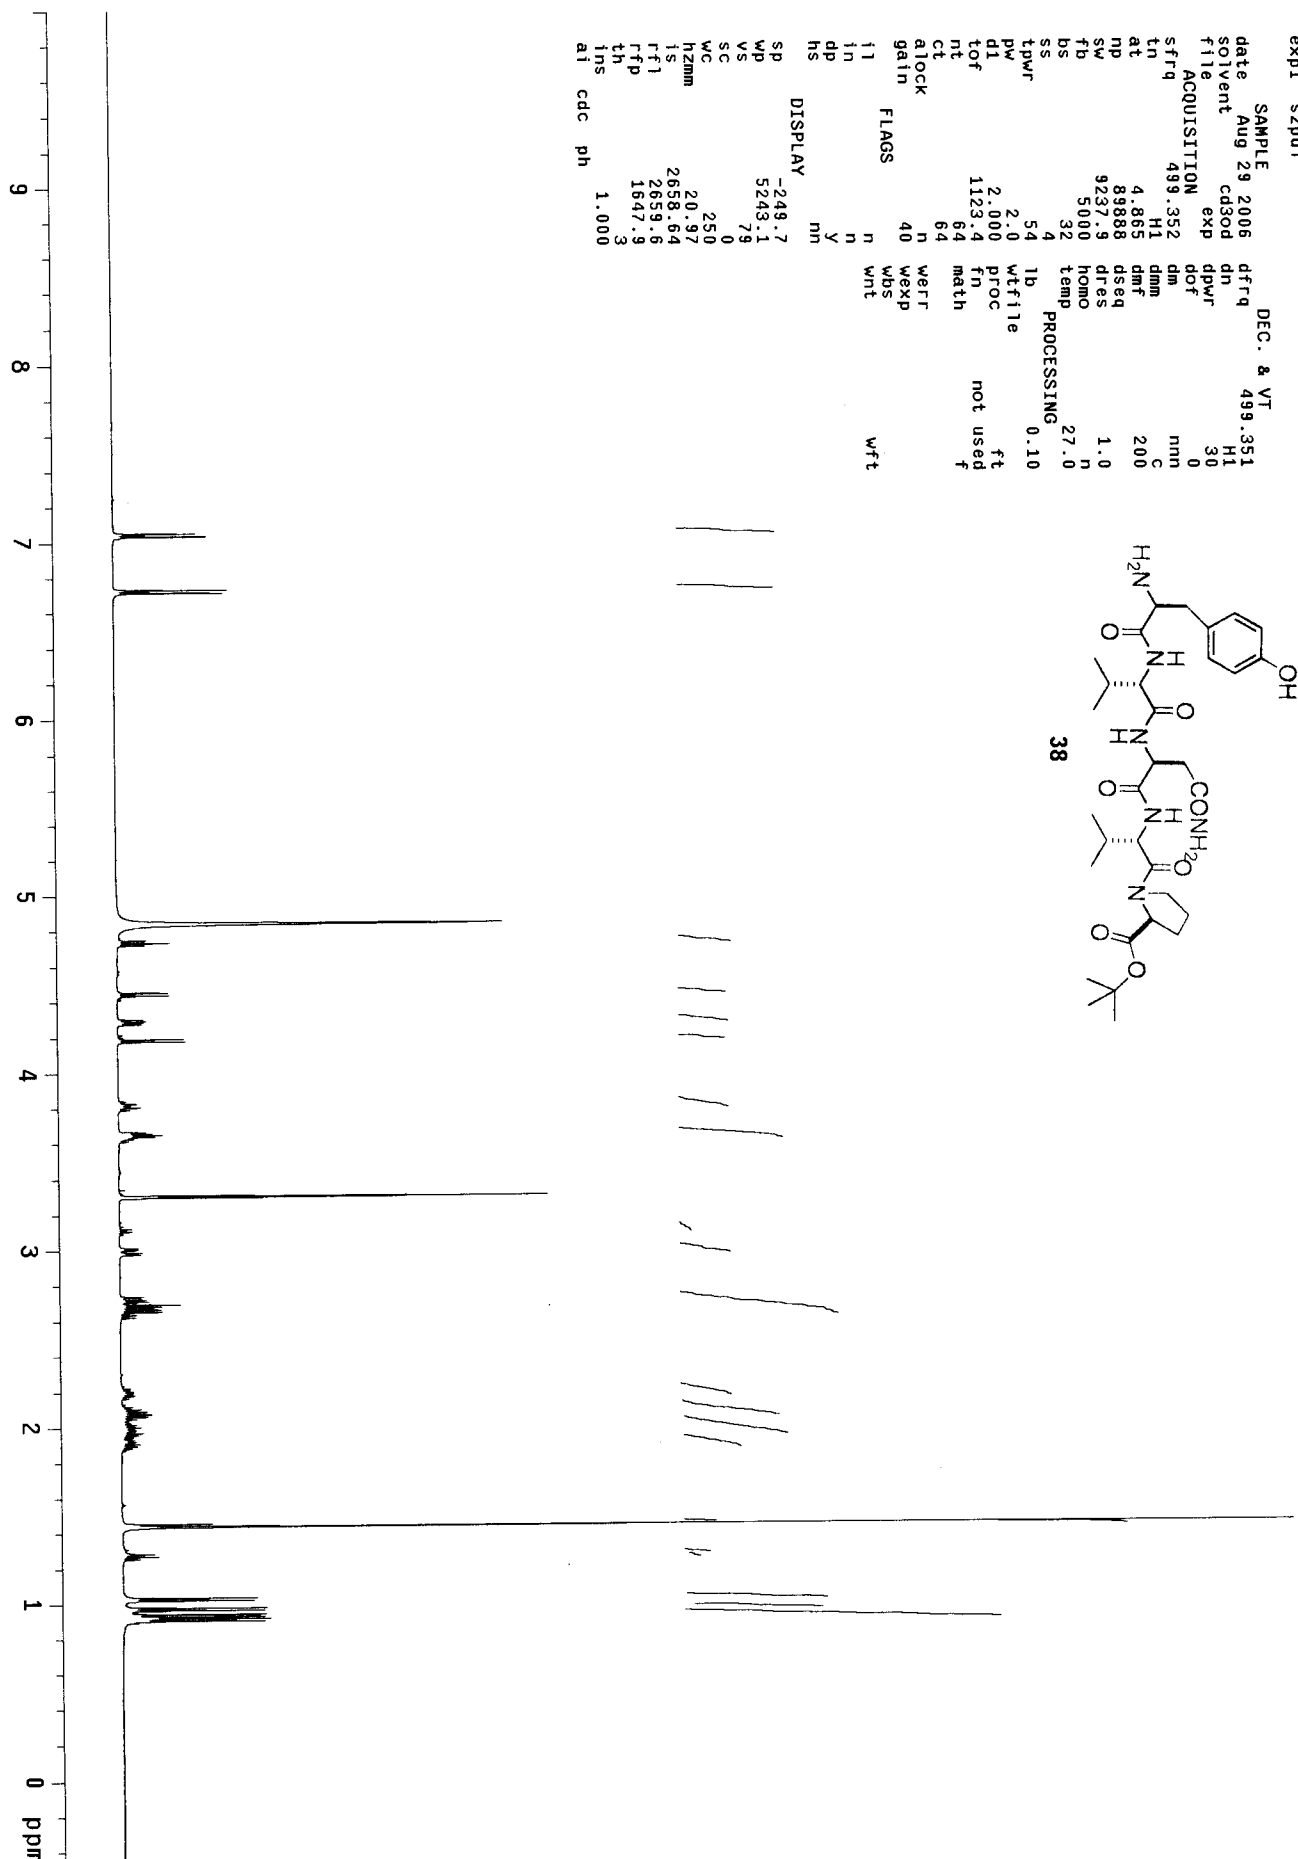

JEDII-227

exp4 s2pul

SAMPLE DEC. & VT

date Aug 29 2006 dfrq 499.351

solvent cd3od dn H1

file exp dpr 36

sfreq 125.575 dm -500.0

in C13 dmm 14000

at 1.073 dmf W

np 70058 dseq 1.0

sw 32639.7 dres 1.0

fb 18000 homo 27.0

bs 128 temp PROCESSING 2.00

ss 60 lb

tpwr 4.0 wtfile

pw 2.000 proc ft

d1 1881.9 fn not used

tof 12000 math f

nt 12000

ct 12000

alock n wert

gain 50 wexp

fl n wbs

in n wnt

dp y

hs nm

DISPLAY

sp -627.9

wp 25739.9

vs 1449

sc 0

wc 250

hzmm 102.96

ts 90000.00

rff1 8516.0

rffp 6152.5

th 8

ins 100.000

nm cdc ph

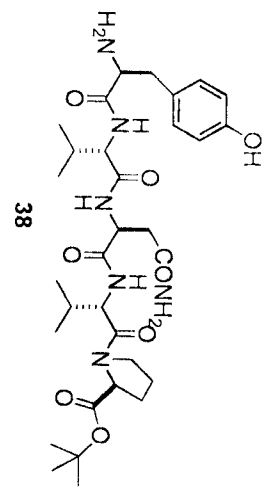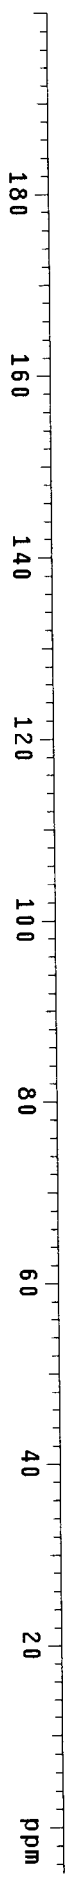

JEDII-230

exp1 presat

|             |             |           |            |          |
|-------------|-------------|-----------|------------|----------|
| date        | Aug 30 2006 | sspul1    | SATURATION | n        |
| solvent     | cd3od       | satpwr    |            | -10      |
| file        | exp         | satfrq    |            | -64.0    |
| ACQUISITION | 499.352     | satdly    |            | 2.000    |
| sfrq        | 499.352     | satmode   |            | ymn      |
| ln          | H1          | composit  |            | n        |
| at          | 4.885       | DEC. & VT |            | H1       |
| np          | 89888       | dn        |            | -64.0    |
| sw          | 9237.9      | dof       |            | nmn      |
| fb          | 5000        | dm        |            | C        |
| bs          | 32          | dmm       |            | 200      |
| ss          | 4           | dmf       |            | 30       |
| tpwr        | 54          | dpwr      |            | 27.0     |
| pw          | 2.0         | temp      | PROCESSING | 0.10     |
| di          | 0           | lb        |            | ft       |
| tof         | 1123.4      | wfille    |            | f        |
| nt          | 64          | proc      |            | not used |
| ct          | 64          | fn        |            |          |
| alock       | n           | math      |            |          |
| gain        | 40          |           |            |          |
| fl          | n           | weft      |            |          |
| in          | n           | wexp      |            |          |
| dp          | y           | wds       |            |          |
| hs          | nm          | wnt       |            |          |

|      |         |         |     |
|------|---------|---------|-----|
| SP   | -249.7  | DISPLAY | wft |
| WP   | 5243.1  |         |     |
| VS   | 194     |         |     |
| SC   | 0       |         |     |
| WC   | 250     |         |     |
| h2mm | 20.97   |         |     |
| IS   | 7539.10 |         |     |
| ftl  | 2659.6  |         |     |
| rfl  | 1647.9  |         |     |
| lh   | 3       |         |     |
| ins  | 1.000   |         |     |
| ai   | cdc     | ph      |     |

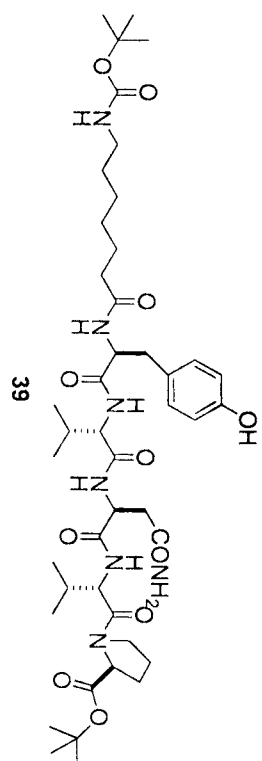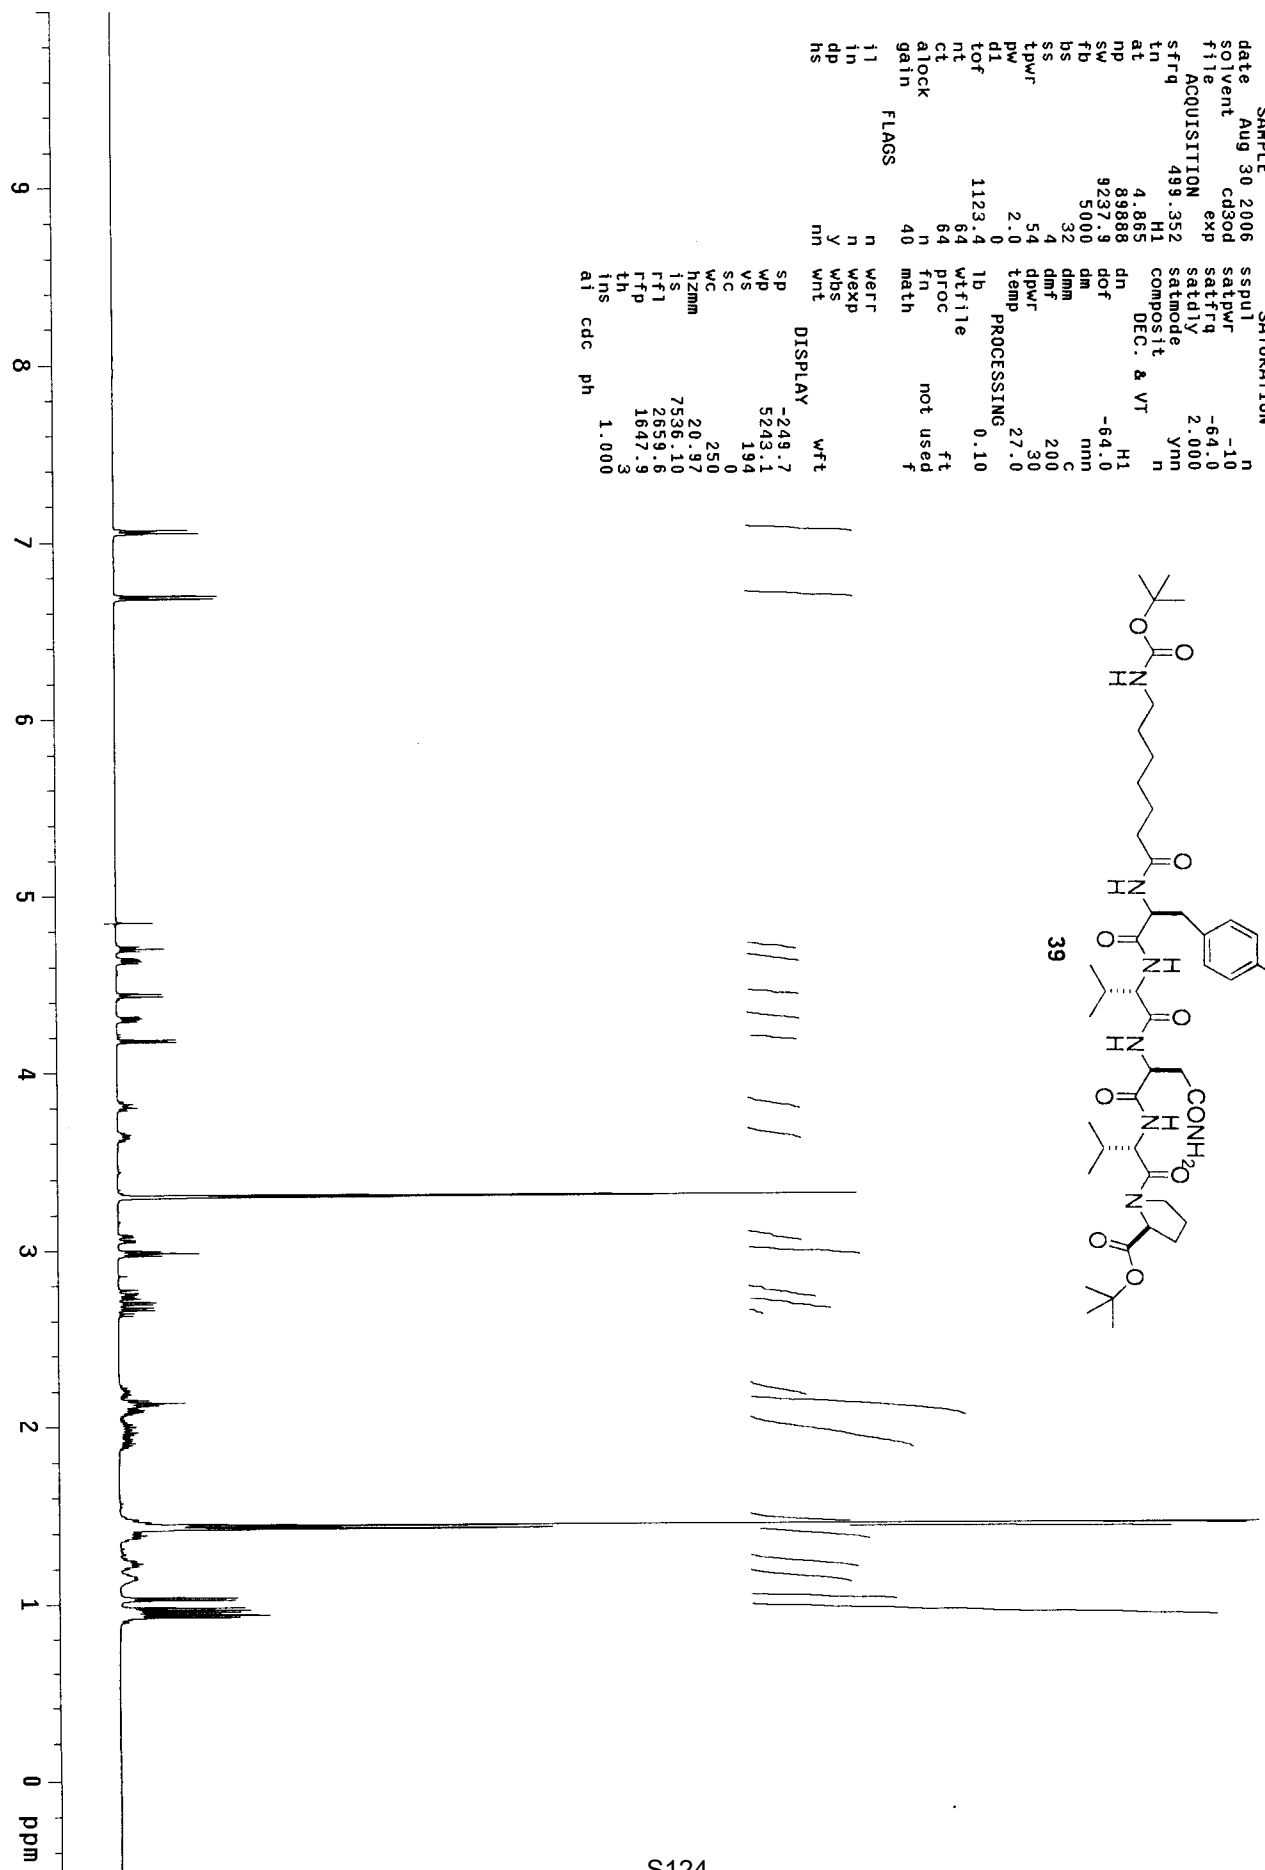

JFDII-230

exp4 s2pu1

SAMPLE

date Aug 30 2006

solvent cd3od

file exp

ACQUISITION

sfrq 125.575

tn 1.073

at 7.058

np 32639.7

sw 18000

bs 64

ss 128

tpwr 4.0

pt 2.000

dt 1881.9

tof 12000

nt 12000

ct 12000

alock n

gain 50

fl n

in n

dp y

hs nm

DISPLAY

sp -627.9

wp 25739.9

vs 3399

sc 0

wc 250

h2mm 102.96

ls 90000.00

rfl 8514.5

rflp 6152.5

th 16

ins 100.000

nm cdc ph

DEC. & VT

dfrq 499.351

dn H1

dpwr 36

dof -500.0

dm YYY

dmm Y

dmt 14000

dseq 1.0

dres n

homo 27.0

temp

PROCESSING

lb 2.00

wf file

proc ft

fn not used

math

weff

wexp

wbs

wrt

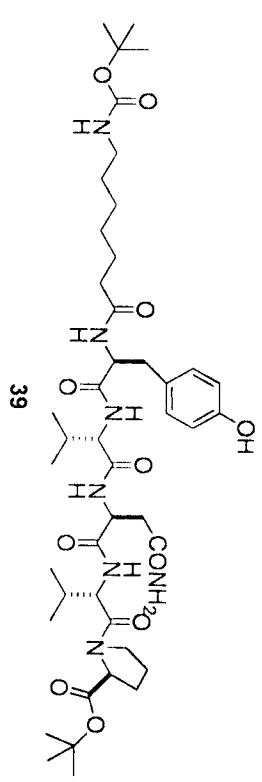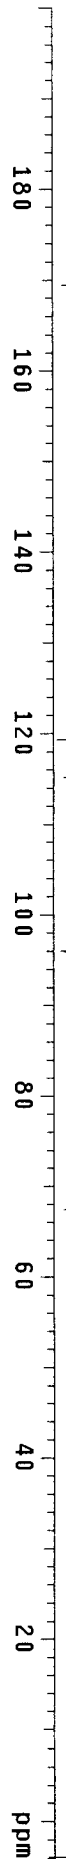

Jed7-64

Pulse Sequence: s2pu1

Solvent: cd3od

Ambient temperature

Mercury-400BB "nmr8"

Relax. delay 2.000 sec

Pulse: 16.4 degrees

Acq. time 2.856 sec

Width 5002.2 Hz

48 repetitions

OBSERVE H1, 400.2685529 MHz

DATA PROCESSING

Line broadening 0.1 Hz

FT size 32768

Total time 0 min, 0 sec

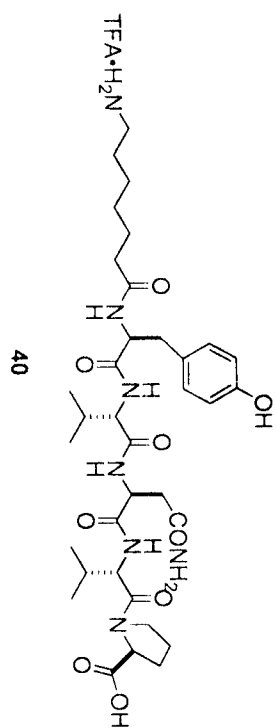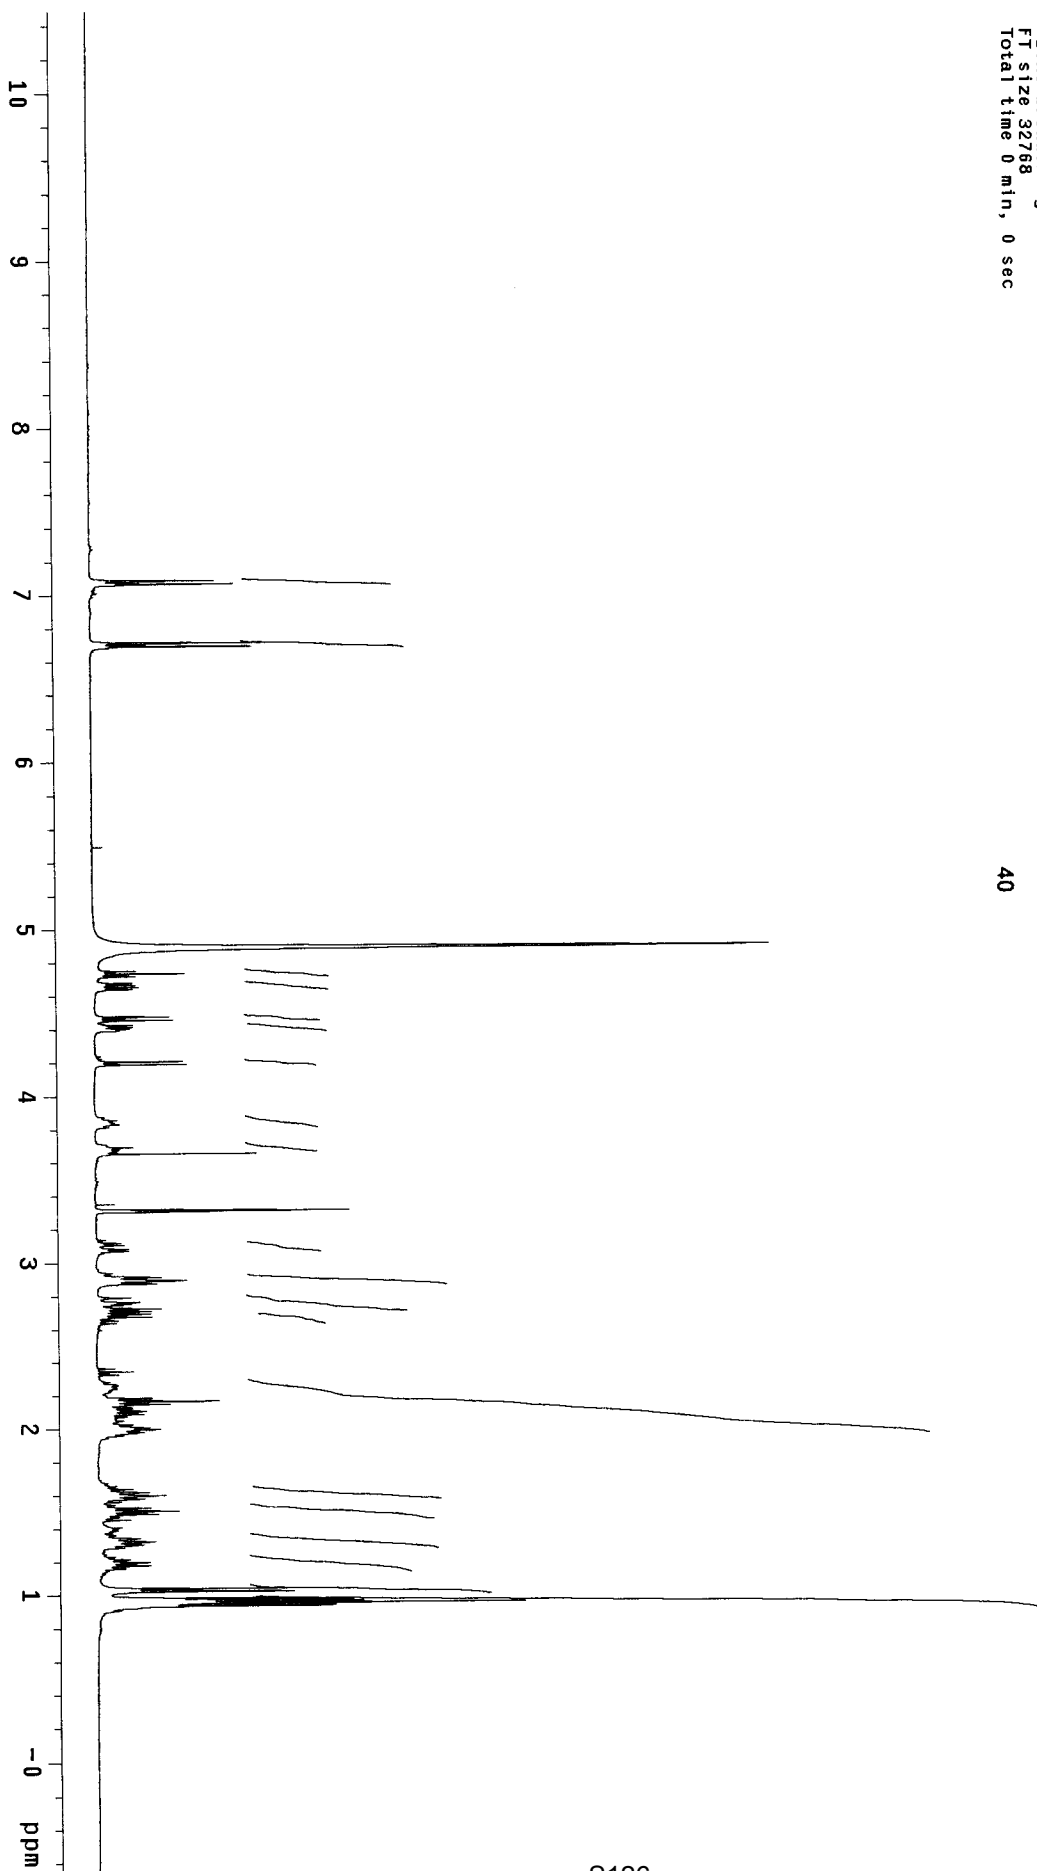

exp4 Carbon

|             |             |            |          |
|-------------|-------------|------------|----------|
| date        | Apr 29 2010 | temp       | 27.0     |
| solvent     | cd3od       | gain       | 50       |
| file        | exp         | spn        | 20       |
| ACQUISITION | 30143.2     | hst        | 0.008    |
| sw          | 1.062       | pw90       | 15.500   |
| np          | 64024       | alfa       | 10.000   |
| fb          | 17000       | FLAGS      |          |
| bs          | 64          | in         | n        |
| ss          | 128         | dp         | n        |
| d1          | 2.000       | hs         | y        |
| nt          | 5000        | PROCESsing | nm       |
| ct          | 1691        | fn         | 1.00     |
| tn          | TRANSMITTER | lb         | not used |
| stq         | C13         | fn         | not used |
| tof         | 125.588     | sp         | -628.3   |
| tpwr        | 1254.2      | wp         | 25742.4  |
| pw          | 8.000       | rf1        | 7893.6   |
| DECOUPLER   | H1          | rfp        | 6153.1   |
| dn          | 0           | tp         | -92.0    |
| dof         | 0           | lp         | -212.1   |
| dm          | YYY         | wc         | 250      |
| dmm         | w           | sc         | 0        |
| dpwr        | 39          | vs         | 16371    |
| dmf         | 12600       | th         | 68       |
|             |             | ai         | cdc ph   |

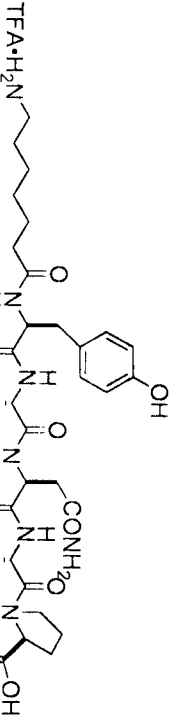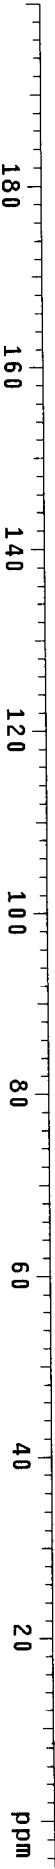

JEDI-233

exp1 presat

|             |            |           |            |          |
|-------------|------------|-----------|------------|----------|
| date        | Sep 1 2006 | sspul     | SATURATION | n        |
| solvent     | cd3od      | satpw     |            | -10      |
| file        | exp        | satfrq    |            | -63.2    |
| ACQUISITION | 499.352    | satdly    |            | 2.000    |
| sfrq        | H1         | satmode   |            | ym       |
| tn          | 4.865      | composit  |            | n        |
| at          | 89888      | DEC: & VT |            | H1       |
| np          | 9237.9     | dn        |            | -63.2    |
| sw          | 5000       | dof       |            | nm       |
| fb          | 32         | dmm       |            | C        |
| bs          | 2          | dmf       |            | 200      |
| ss          | 54         | dpwr      |            | 30       |
| tpwr        | 2.0        | temp      | PROCESSING | 27.0     |
| pw          | 0          |           |            | 0.10     |
| d1          | 1123.4     | lb        |            |          |
| tof         | 64         | wtfile    |            |          |
| nt          | 64         | proc      |            | not used |
| ct          | n          | fn        |            | f        |
| alock       | n          | math      |            |          |
| gain        | 40         |           |            |          |
| fl          | n          | werr      |            |          |
| in          | n          | wexp      |            |          |
| dp          | y          | wbs       |            |          |
| hs          | mn         | wnt       |            |          |

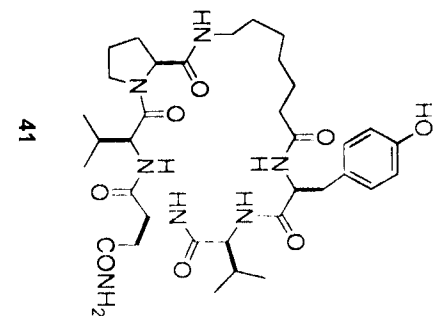

|     |          |         |     |
|-----|----------|---------|-----|
| SP  | -249.7   | DISPLAY | wft |
| WD  | 5243.1   |         |     |
| VS  | 2430     |         |     |
| SC  | 0        |         |     |
| WC  | 250      |         |     |
| hzm | 20.97    |         |     |
| is  | 20746.28 |         |     |
| rfl | 2659.6   |         |     |
| rff | 1647.9   |         |     |
| th  | 4        |         |     |
| ins | 1.000    |         |     |
| al  | cdc      |         | ph  |

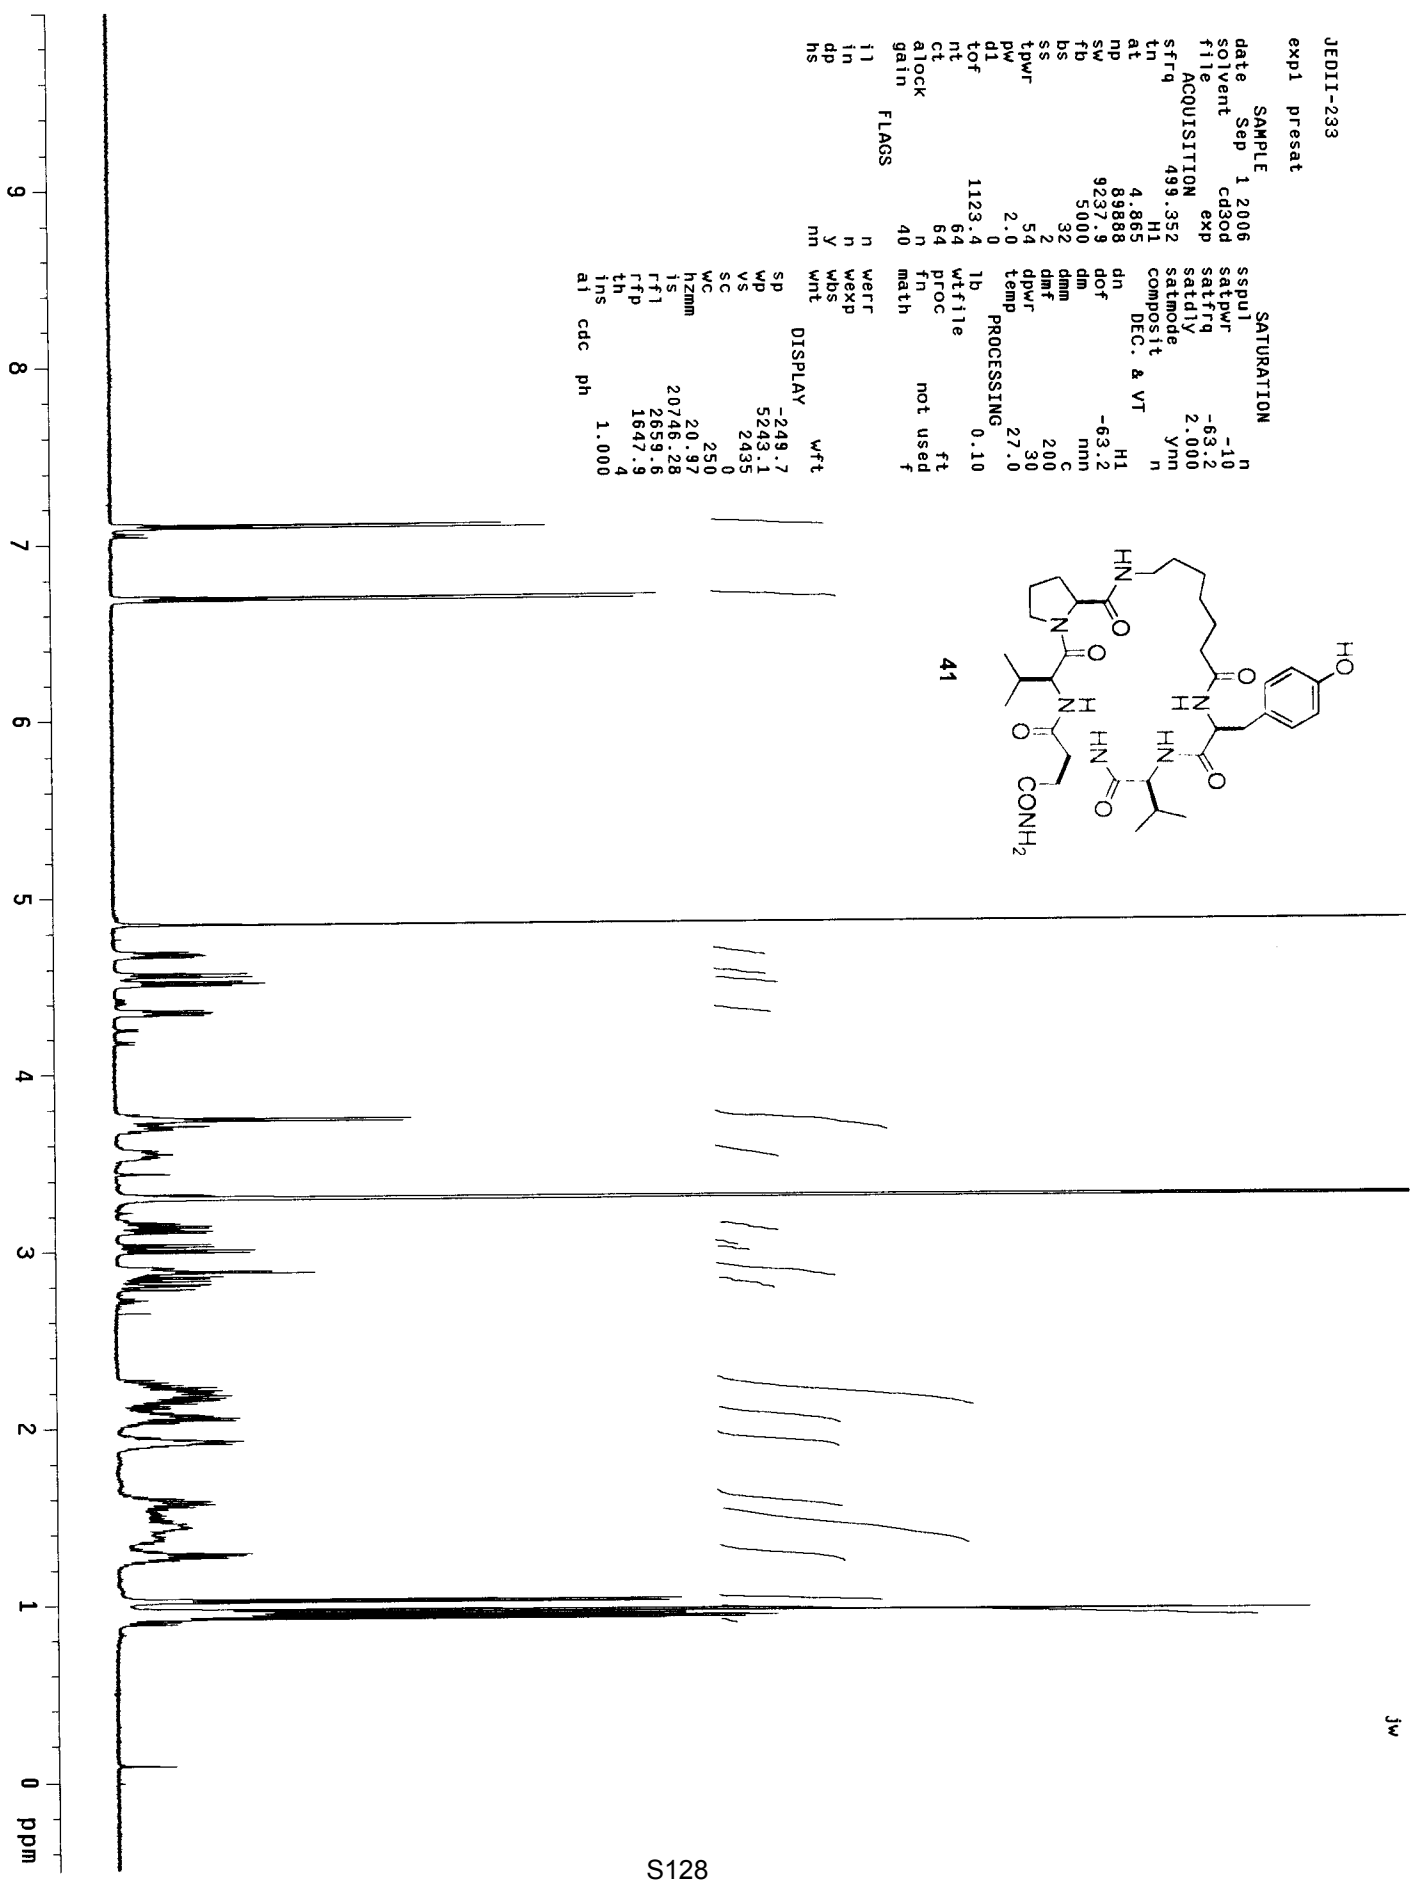



JEDI1-242  
 temp=130c  
 jedi1242\_c13\_130c

exp4 s2pul1

SAMPLE date Feb 13 2007 DEC. & VT  
 solvent DMSO dfrq 499.869  
 file exp dn H1  
 ACQUISITION dpwr 37  
 125.706 dm 0  
 C13 dnm yyy  
 1.279 dmt y  
 85262 dseq 10582  
 33333.3 dres 1.0  
 not used homo n  
 temp 130.0  
 PROCESSING 1.00  
 53 lb  
 3.0 wtfile  
 2.000 proc ft  
 2198.1 fn not used  
 18000 math f  
 gain n  
 60 werr  
 60 wexp  
 n wbs  
 y wnt

DISPLAY  
 sp -628.5  
 wp 257.66.5  
 vs 11066  
 sc 0  
 WC 250  
 Hzmm 103.07  
 IS 300.00  
 rfl 7667.5  
 rfp 4964.8  
 th 68  
 ins 100.000  
 ai cdc ph

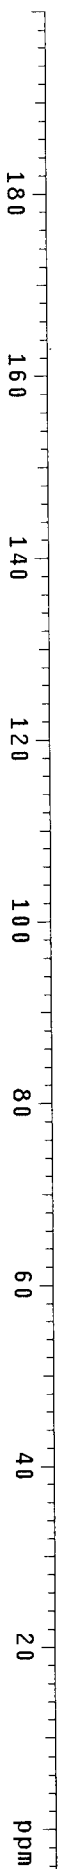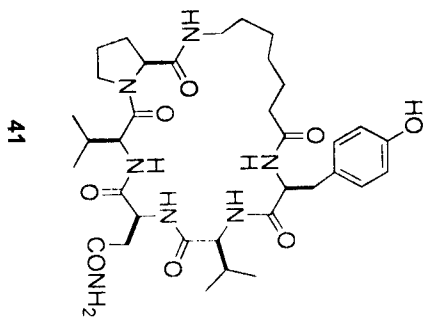



600 MHz nmrox

23macpyvnpv

exp4 Carbon

|             |             |            |         |      |
|-------------|-------------|------------|---------|------|
| date        | Mar 11 2010 | SAMPLE     | temp    | 27.0 |
| solvent     |             | d2o        | gain    | 40   |
| file        | exp         | exp        | spin    | 20   |
| ACQUISITION | 40322.6     | hst        | 0.008   |      |
| sw          | 2.000       | pw90       | 7.800   |      |
| at          | 161290      | afra       | 10.000  |      |
| np          | 17000       | FLAGS      |         |      |
| fb          | 64          | l1         | n       |      |
| bs          | 32          | in         | n       |      |
| ss          | 2.000       | dp         | y       |      |
| d1          | 13000       | hs         | mn      |      |
| nt          | 13000       | PROCESSING | 0.50    |      |
| ct          | TRANSMITTER | fn         | 262144  |      |
| tn          | C13         | DISPLAY    | -754.2  |      |
| stfq        | 150.824     | sp         | 30915.4 |      |
| lof         | 2296.3      | wp         | 3572.5  |      |
| tpwr        | 58          | rfl        | 0       |      |
| pw          | 3.900       | rffp       | 213.1   |      |
| DECOUPLER   | H1          | rp         | 0       |      |
| dn          | 0           | lp         | 0       |      |
| dof         | 0           | PLOT       | 250     |      |
| dm          | YYY         | wc         | 0       |      |
| dmm         | w           | sc         | 0       |      |
| dpwr        | 46          | vs         | 267807  |      |
| dmf         | 15337       | th         | 68      |      |
|             |             | ai         | cdc     | ph   |

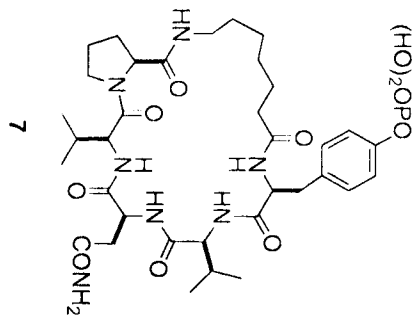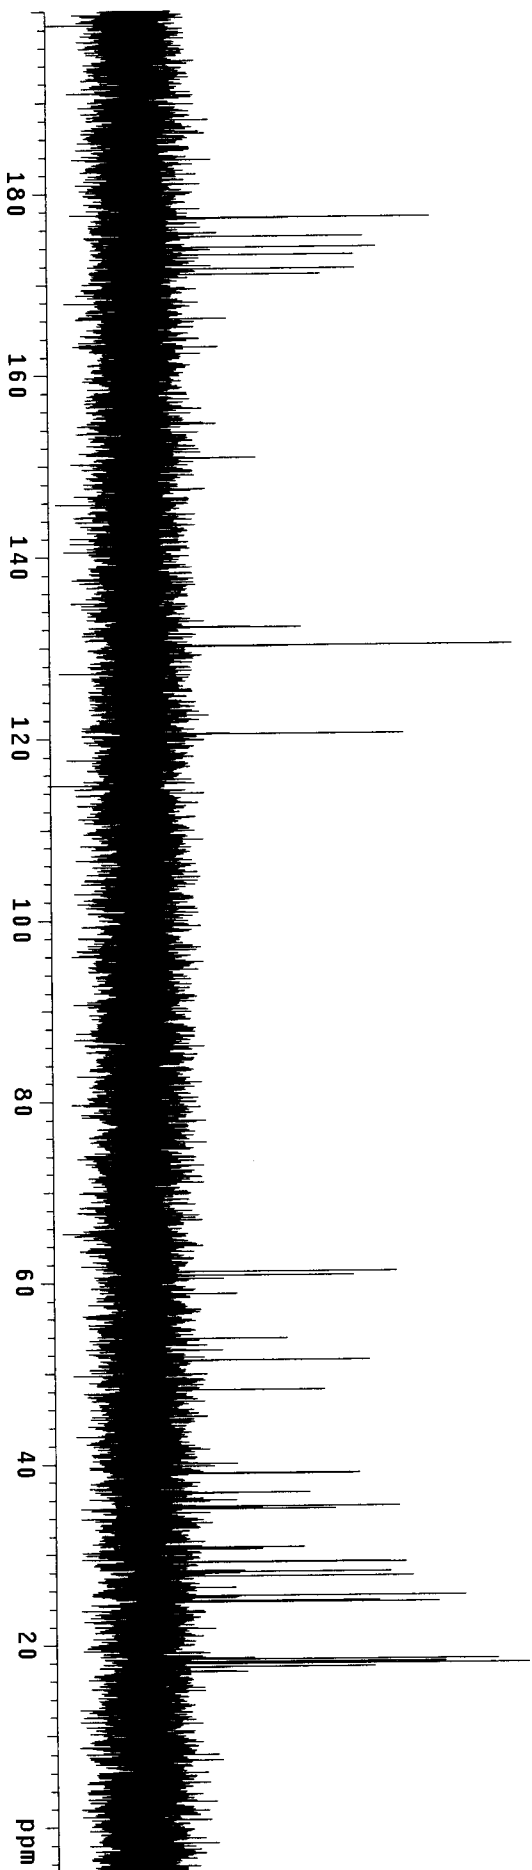

JEDI(291)-11/10/06

Pulse Sequence: s2pu1

Solvent: CDCl3

Ambient temperature

Mercury-400BB "nmr6"

Relax. delay 2.000 sec

Pulse 16.4 degrees

Acq. time 2.856 sec

Width 5602.2 Hz

36 repetitions

OBSERVE H1, 400.2669784 MHz

DATA PROCESSING

Line broadening 0.1 Hz

FT size 32768

Total time 3 min, 34 sec

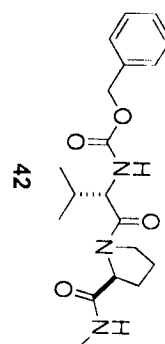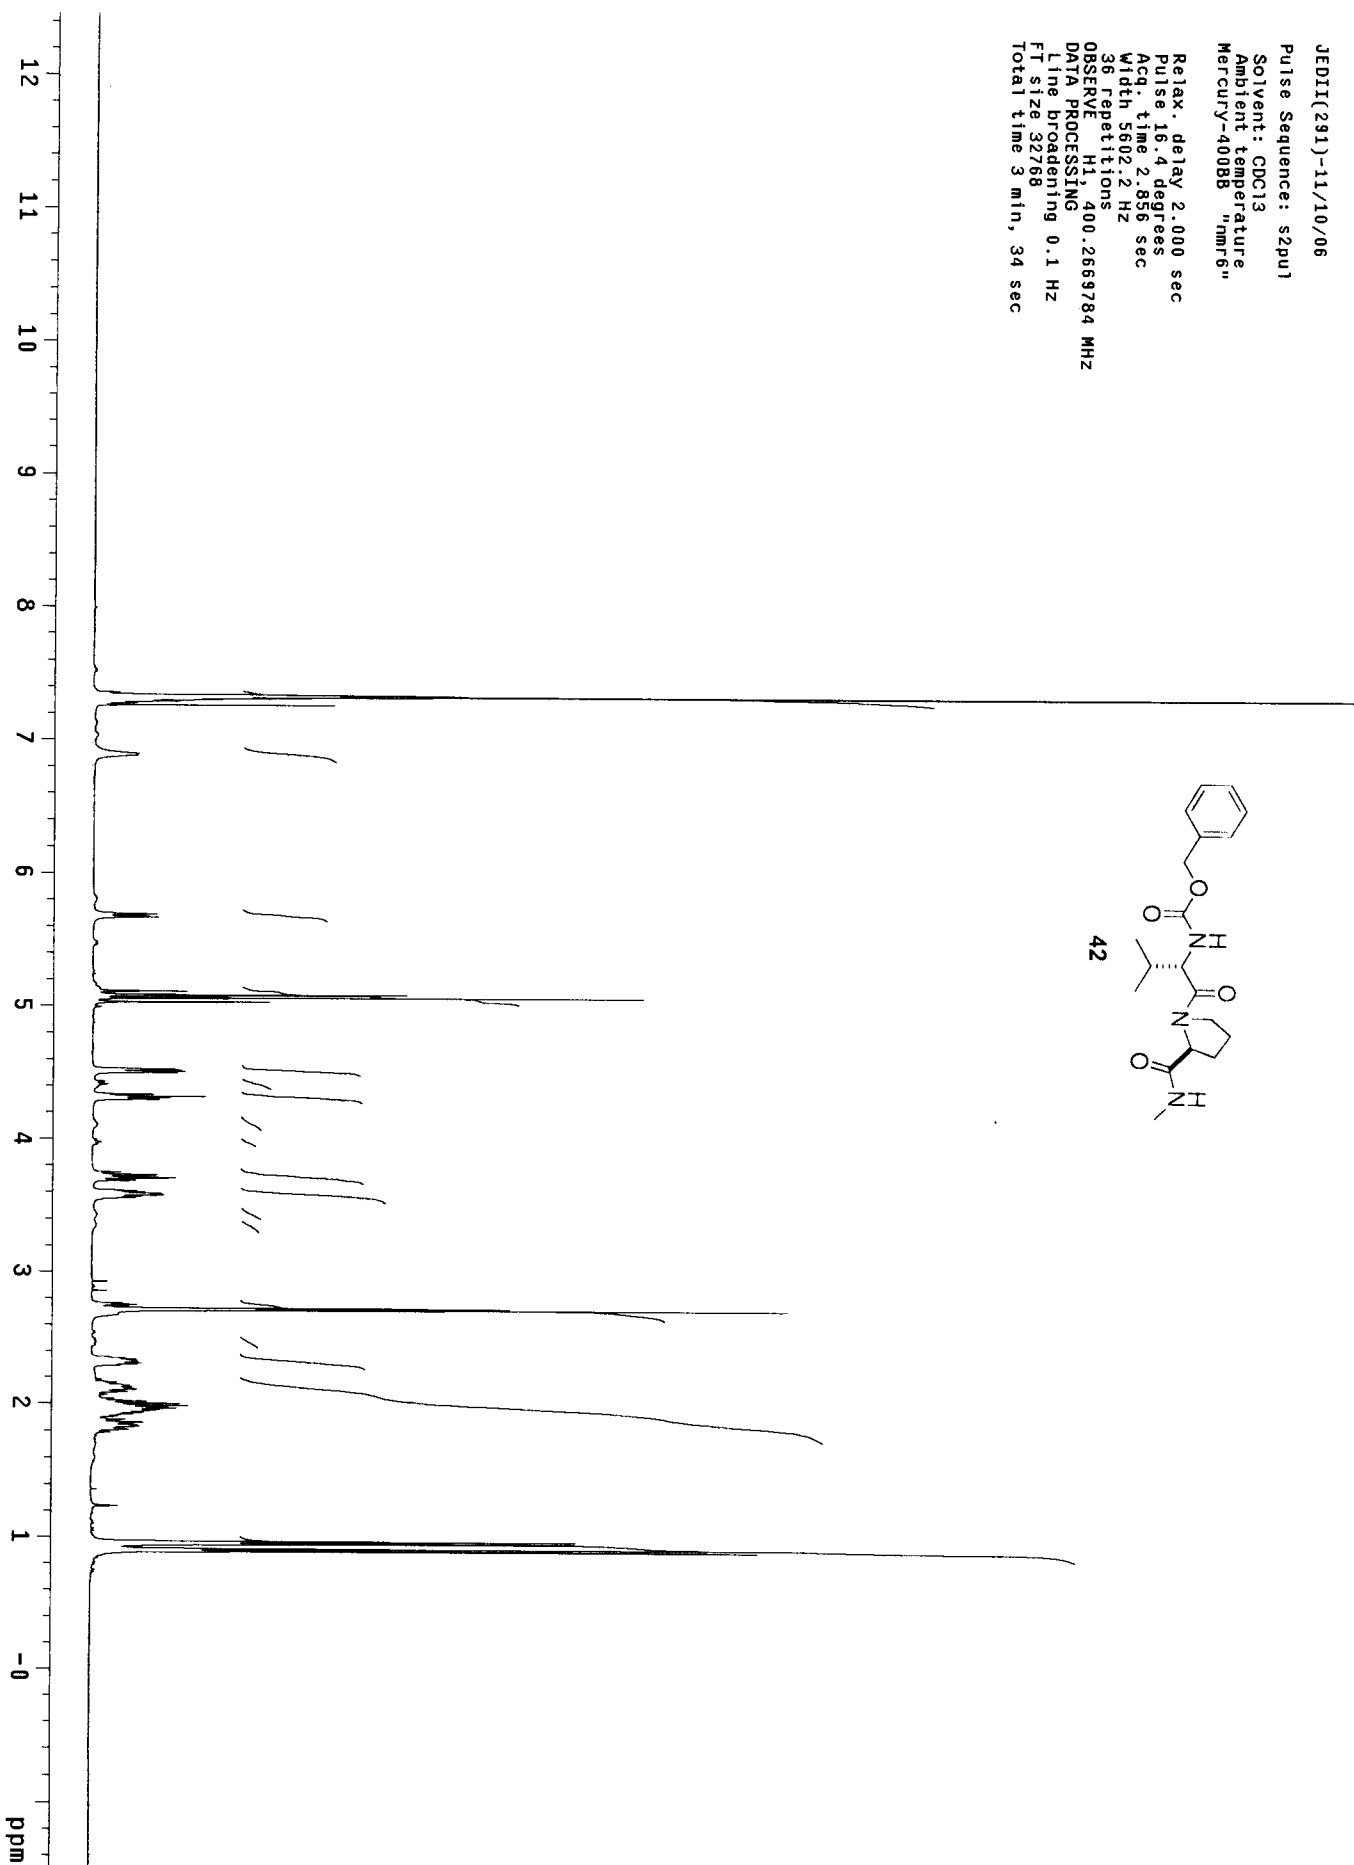

Archive directory:  
Sample directory:

Pulse Sequence: szpu1

Solvent: cdcl3  
Temp. 27.0 C / 300.1 K  
User: 1-14-87  
File: martin\_jed2-291\_szpu1\_C13  
INOVA-500 "mmrfred"

42

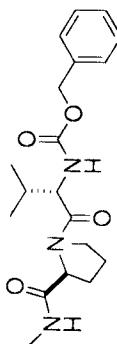

Relax. delay 2.000 sec  
Pulse 30.0 degrees  
Acq. time 1.300 sec  
Width 24509.8 Hz  
1000 repetitions  
OBSERVE C13, 100.5309507 MHz  
DECUPLE H1, 399.8067108 MHz  
Power 43 dB  
continuously on  
WALTZ-16 modulated  
DATA PROCESSING  
Line broadening 1.0 Hz  
Ft size 65536  
Total time 55 min, 9 sec

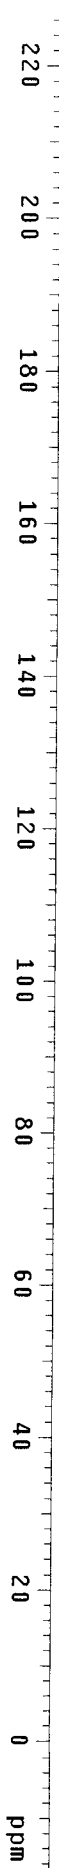

JEDIII(30)-1/30/07

Pulse Sequence: s2pu1

Solvent: CD3OD

Ambient temperature

Mercury-400BB "nmr6"

Relax. delay 2.000 sec

Pulse 16.4 degrees

Acq. time 2.856 sec

Width 5602.2 Hz

34 repetitions

OBSERVE H1, 400.2685554 MHz

DATA PROCESSING

Line broadening 0.1 Hz

FT size 32768

Total time 3 min, 34 sec

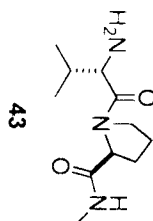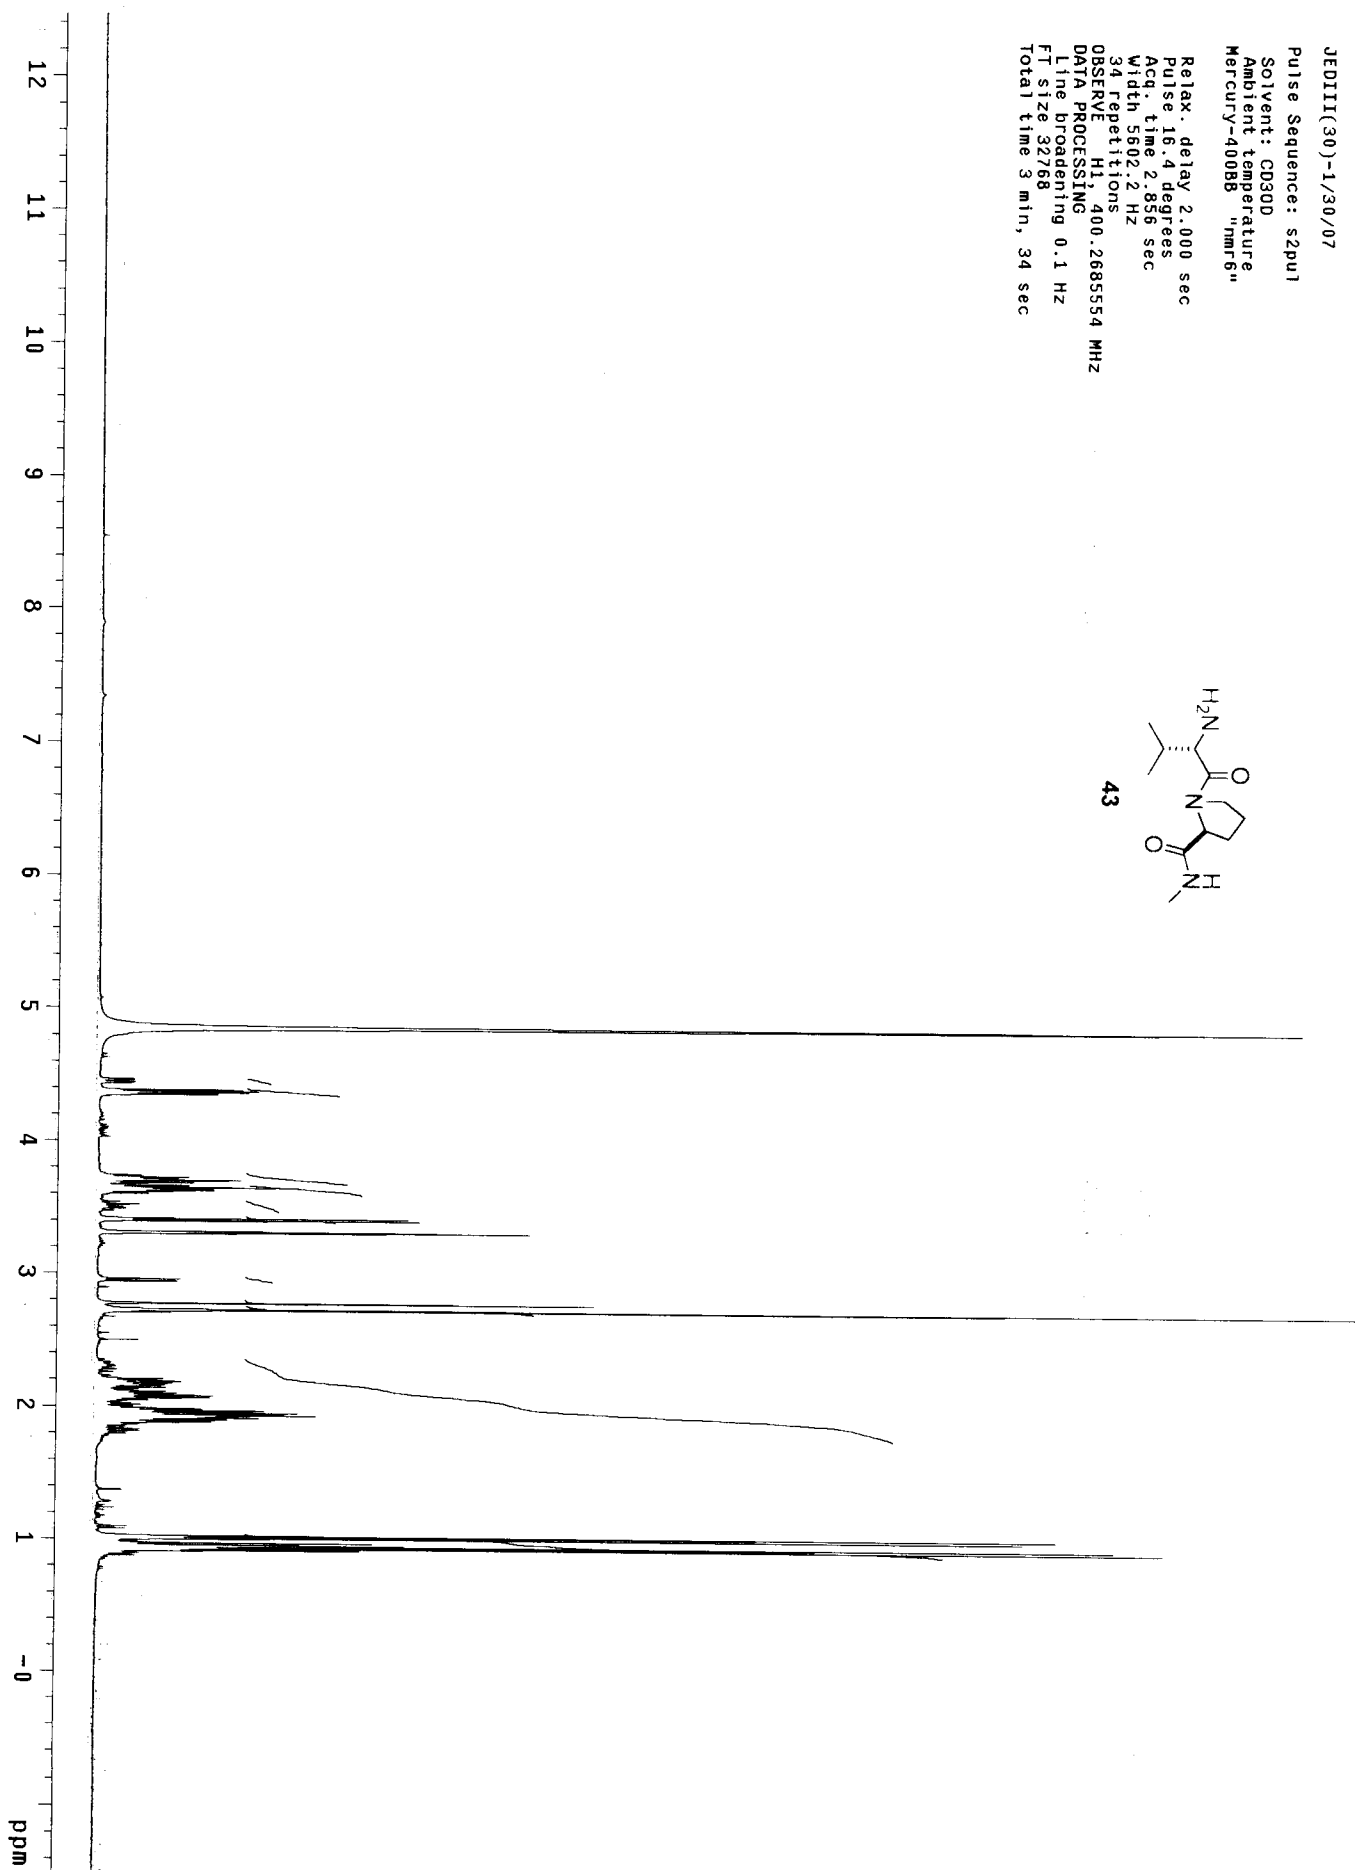

Archive directory:  
Sample directory:

Pulse Sequence: s2pu1

Solvent: cd3od  
Temp. 27.0 C / 300.1 K  
User: 1-14-87  
File: martin\_jed3-30carb\_s2pu1\_C13  
INOVA-500 "usb"

Relax. delay 2.000 sec  
Pulse 30.0 degrees  
Acq. time 1.300 sec  
Width 24509.8 Hz  
2000 Repetitions  
OBSERVE C13, 100.5312290 MHz  
DECUPLE H1, 399.8082850 MHz  
Power 44 dB  
continuously on  
WALTZ-16 modulated  
DATA PROCESSING  
Line broadening 1.0 Hz  
FT size 65536  
Total time 1 hr, 50 min, 18 sec

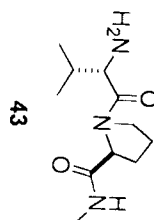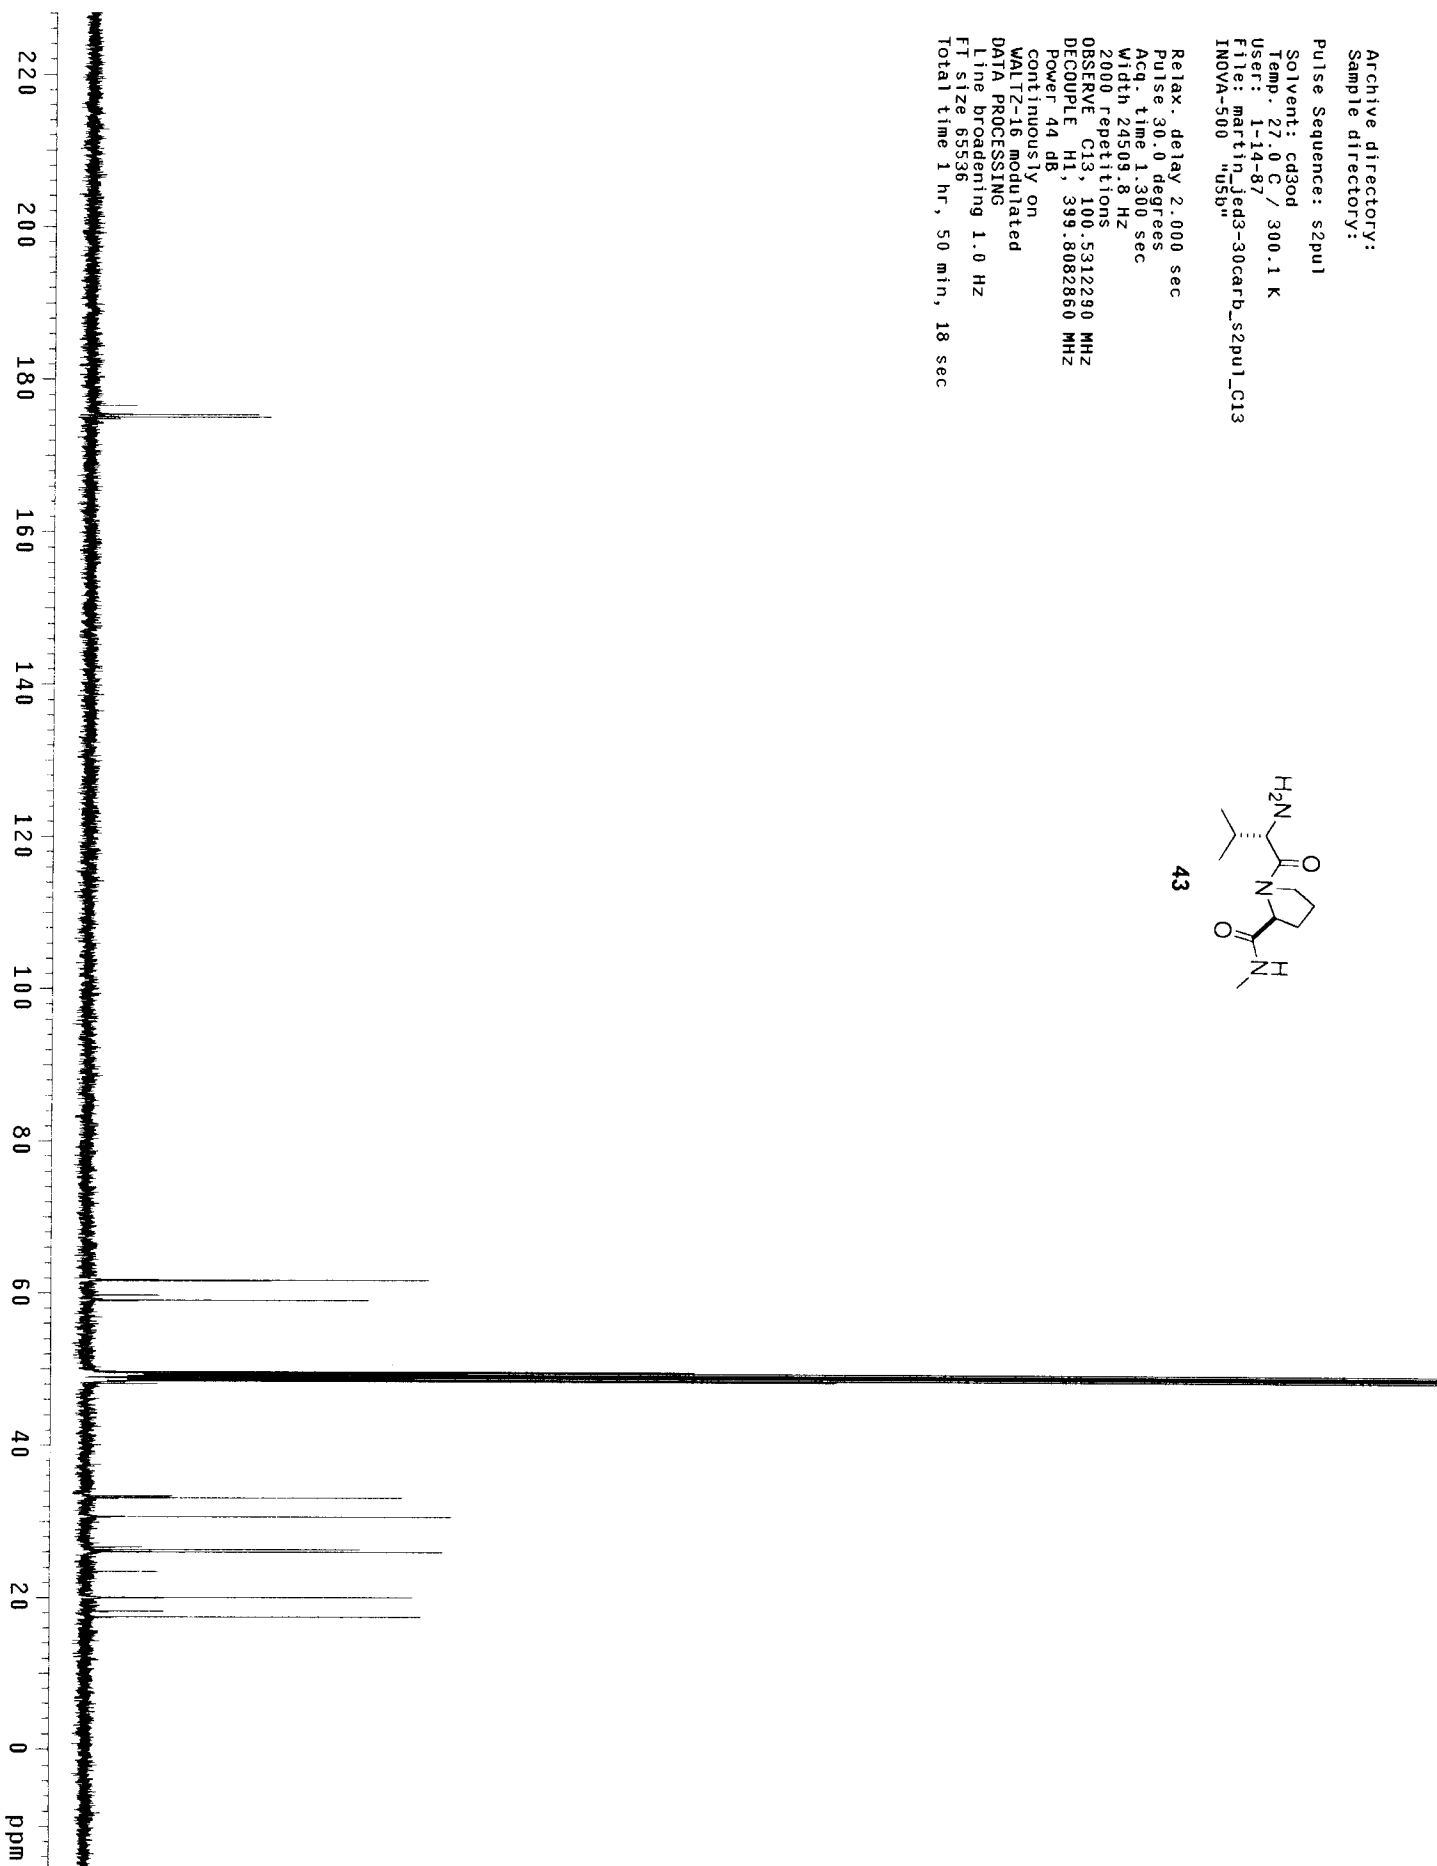

Archive directory:  
Sample directory:

Pulse Sequence: s2pu1

Solvent: cd3od  
Temp: 27.0 C / 300.1 K  
File: martin\_jed2-295\_s2pu1\_H1  
INOVA-500 "usb"

Relax. delay 2.000 sec  
Pulse 30.0 degrees  
Acq. time 4.049 sec

Width 6410.3 Hz

64 repetitions

OBSERVE H1, 399.8062867 MHz

DATA PROCESSING

Line broadening 0.1 Hz

FT size 65536

Total time 6 min, 39 sec

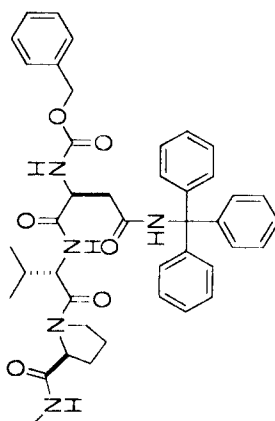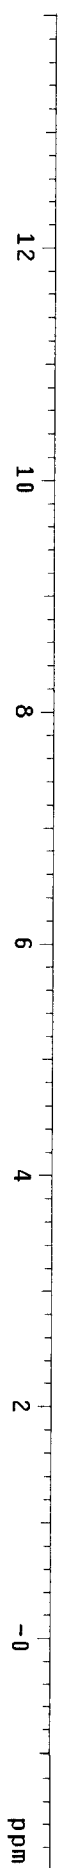



Archive directory:  
Sample directory:

Pulse Sequence: szpul

Solvent: cd3od  
Temp: 27.0 C / 300.1 K  
User: 1-14-87  
File: martin\_jed2-295a\_szpu1\_C13  
INOVA-500 "usb"

Relax. delay 2.000 sec  
Pulse 30.0 degrees  
Acq. time 1.300 sec  
Width 24509.8 Hz  
5000 repetitions  
OBSERVE C13, 100.5313468 MHz  
DECUPLE H1, 399.8082880 MHz  
Power 43 dB  
continuously on  
WALTZ-16 modulated  
DATA PROCESSING  
Line broadening 1.0 Hz  
Ft size 65536  
Total time 4 hr, 35 min, 47 sec

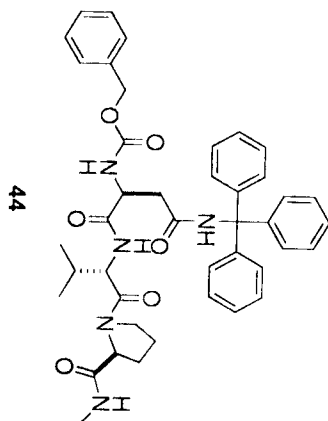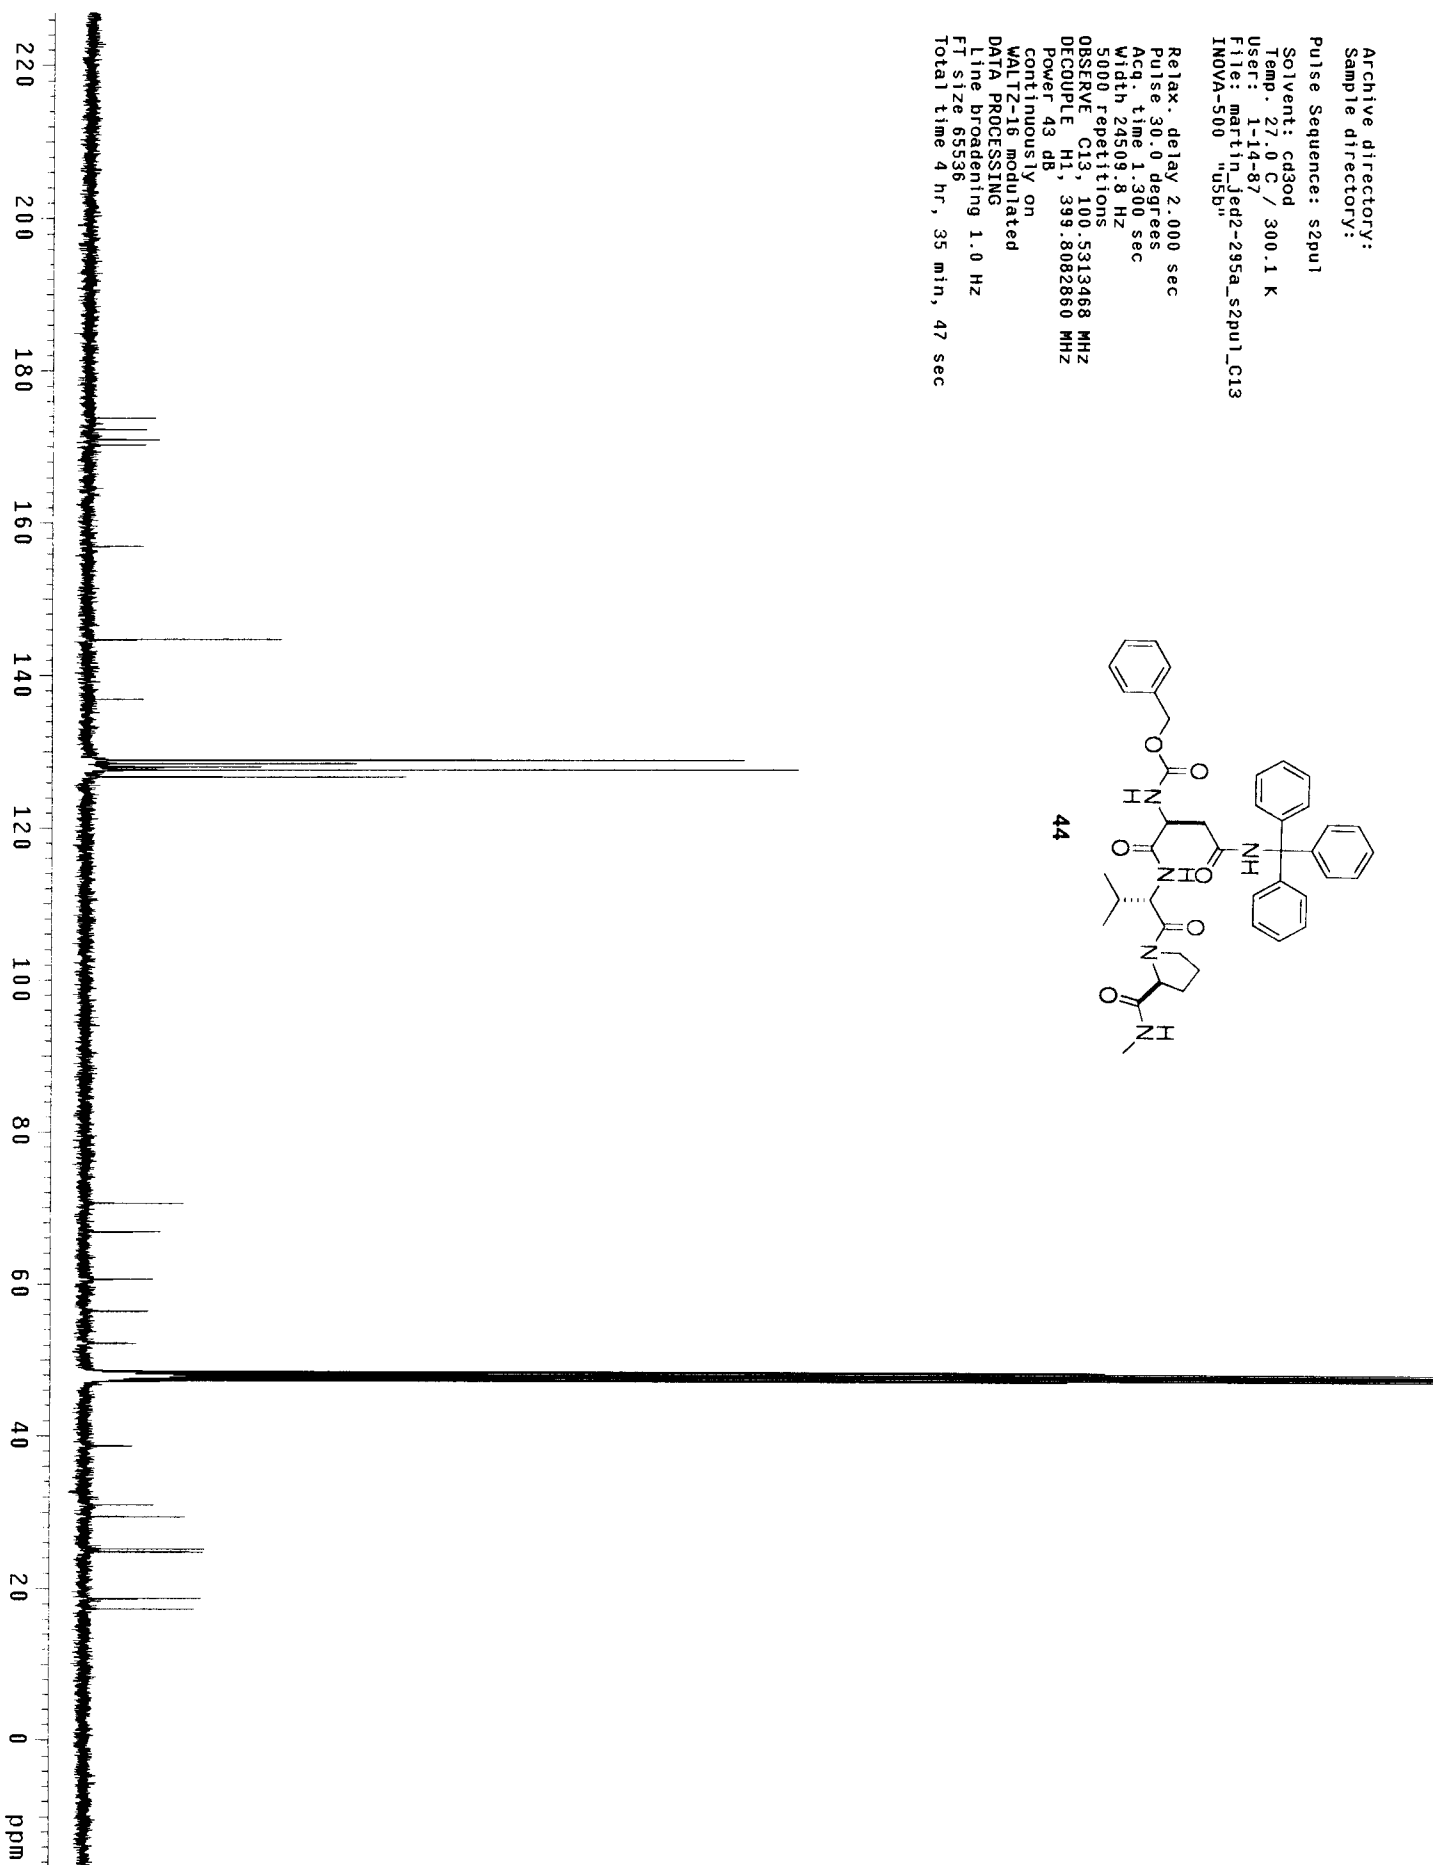

Archive directory:  
Sample directory:

Pulse Sequence: s2pu1

Solvent: cd3od  
Temp: 27.0 C / 300.1 K  
File: martin\_jed3-76\_s2pu1\_H1  
INOVA-500 "nmrfred"

Relax. delay 5.000 sec  
Pulse 30.0 degrees  
Acq. time 4.049 sec  
Width 6410.3 Hz  
64 Repetitions  
OBSERVE H1, 399.8062867 MHz  
DATA PROCESSING  
Line broadening 0.1 Hz  
F1 size 65536  
Total time 9 min, 57 sec

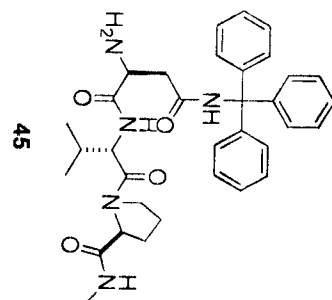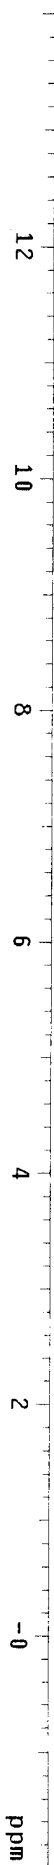

Archive directory:  
Sample directory:

Pulse Sequence: s2pul1  
Solvent: cd3od  
Temp: 27.0 C / 300.1 K  
User: 1-14-87  
File: martin\_jed3-76\_s2pul1\_C13  
INOVA-500 "nmrFred"

Relax. delay 2.000 sec  
Pulse: 30.0 degrees  
Acq. time 1.500 sec  
Width 24509.8 Hz  
5000 repetitions  
OBSERVE C13, 100.5313468 MHz  
DECOUPLE H1, 399.8082860 MHz  
Power 43 dB  
continuously on  
WALTZ-16 modulated  
DATA PROCESSING  
Line broadening 1.0 Hz  
FT size 65536  
Total time 4 hr, 35 min, 47 sec

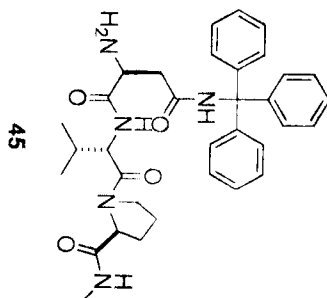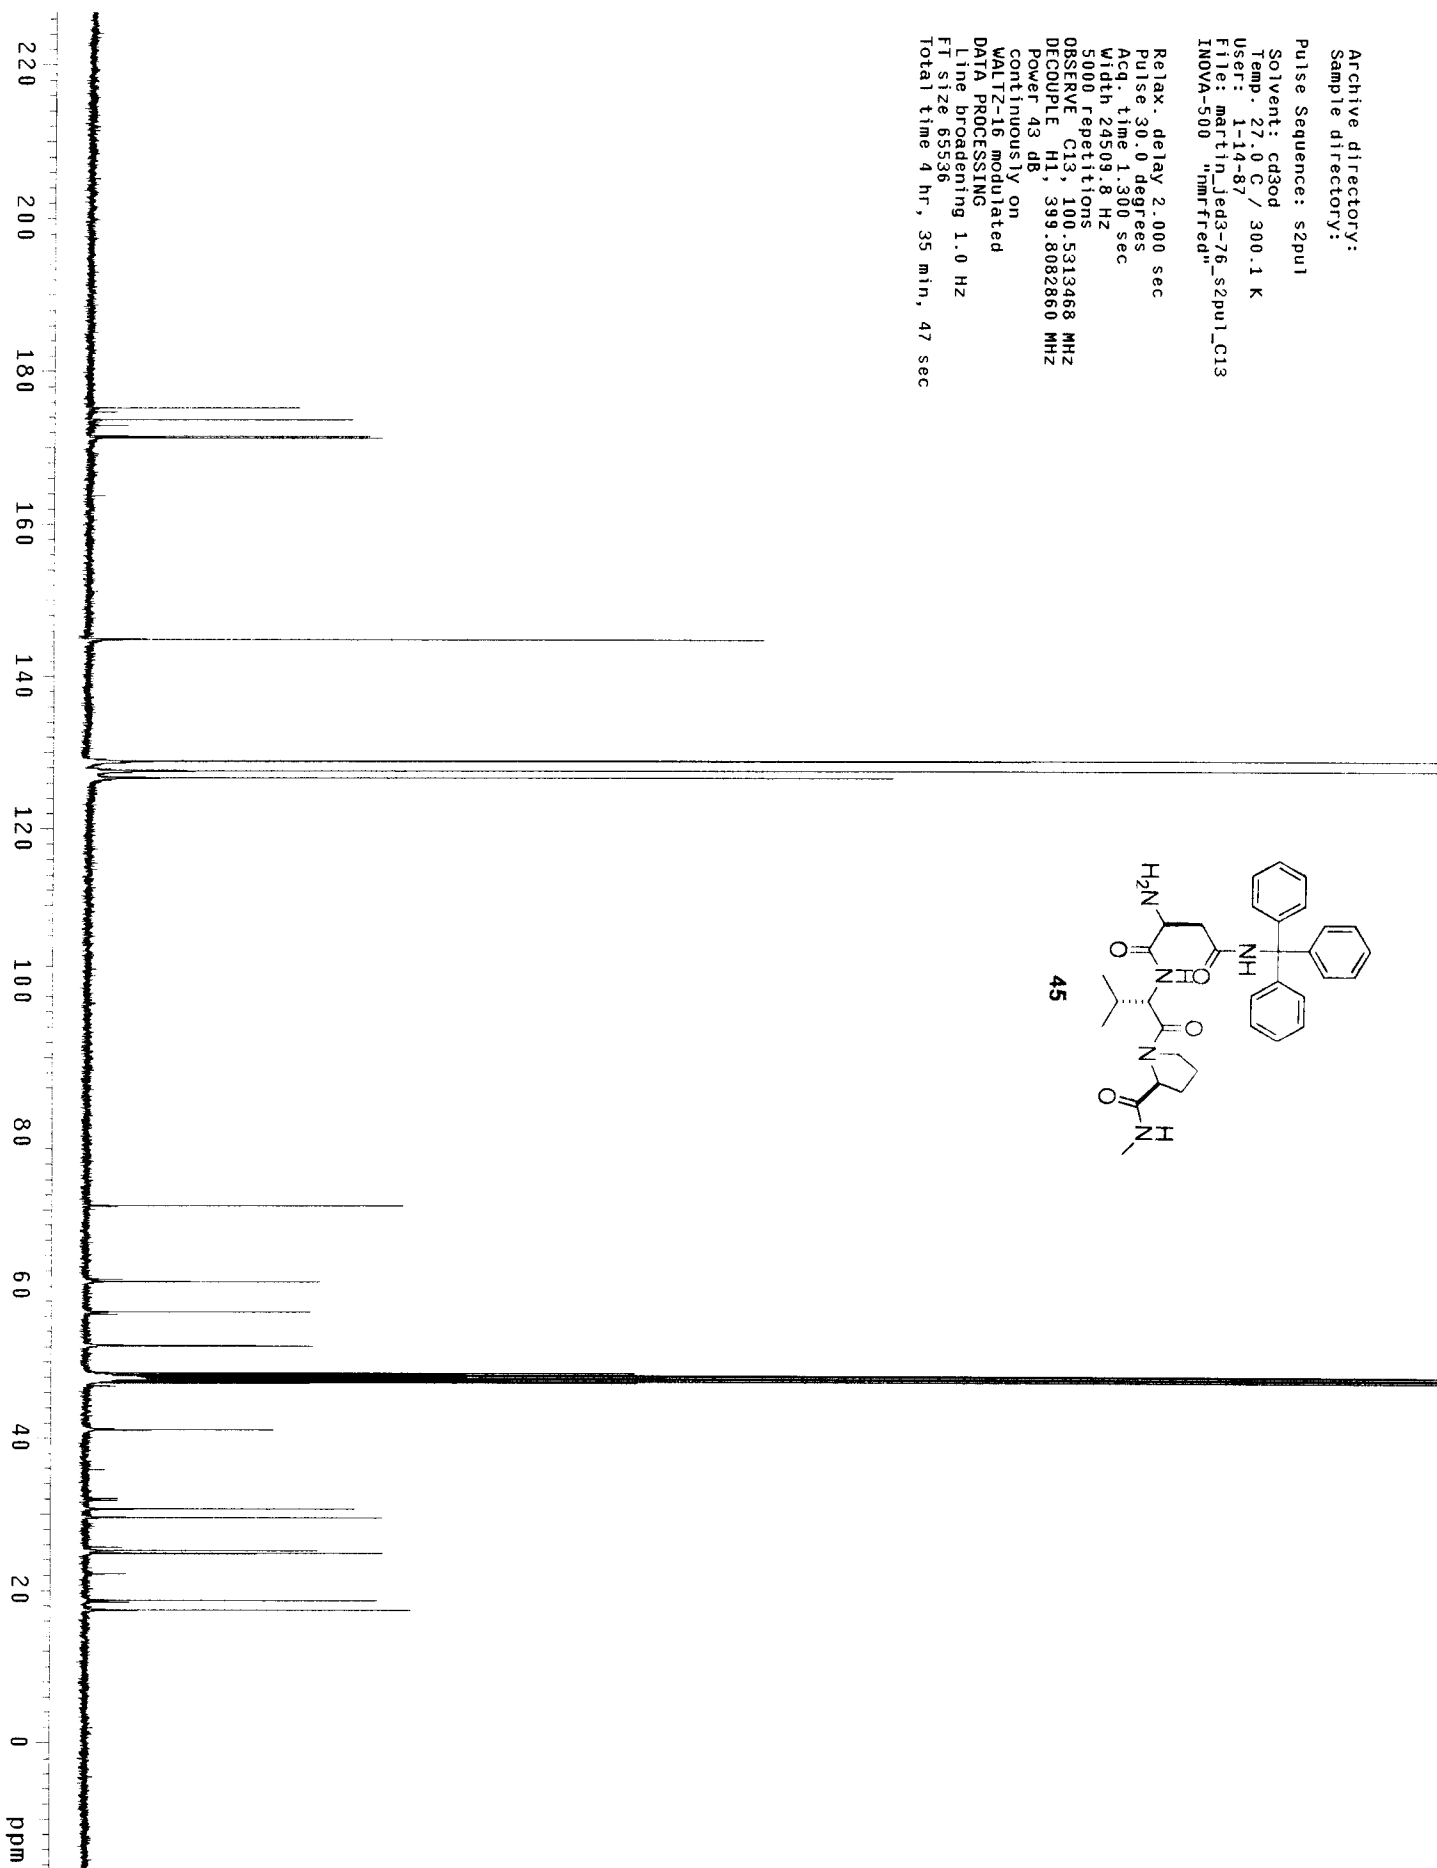



Archive directory:  
Sample directory:

Pulse Sequence: szpu1

Solvent: cd3od  
Temp. 27.0 C / 300.1 K  
User: 1-14-87  
File: martin\_jed2-299\_s2pu1\_C13  
INOVA-500 "usb"

Relax. delay 2.000 sec  
Pulse 30.0 degrees  
Acq. time 1.300 sec  
Width 24509.8 Hz  
512 Repetitions  
OBSERVE C13, 100.5313468 MHz  
DECUPLE H1, 399.8082860 MHz  
Power 43 dB  
continuously on  
WALTZ-16 modulated  
DATA PROCESSING  
Line broadening 1.0 Hz  
FT size 65536  
Total time 28 min, 14 sec

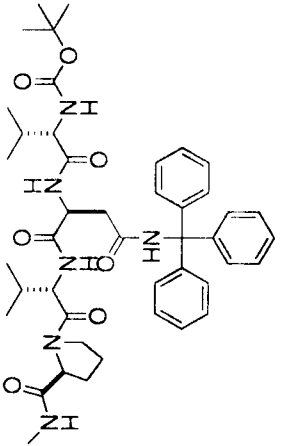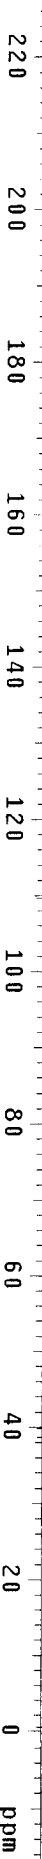

Archive directory:  
Sample directory:

Pulse Sequence: s2pu1

Solvent: cd3od  
Temp: 27.0 C / 300.1 K  
File: martin\_led3-71\_s2pu1\_H1  
INOVA-500 "usb"

Relax. delay 2.000 sec

Pulse 30.0 degrees

Acq. time 4.049 sec

Width 6410.3 Hz

64 repetitions

OBSERVE H1, 399.806267 MHz

DATA PROCESSING

Line broadening 0.1 Hz

FT size 65536

Total time 6 min, 39 sec

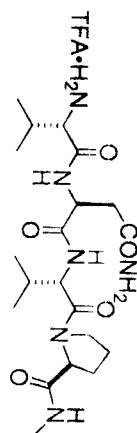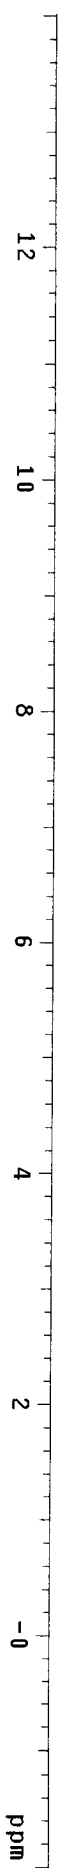

Archive directory:  
Sample directory:

Pulse Sequence: szpul1

Solvent: cd3od  
Temp: 27.0 C / 300.1 K  
User: 1-14-87  
File: martin\_led3-71\_szpul\_C13  
INOVA-500 "USB"

Relax. delay 2.000 sec  
Pulse: 30.0 degrees  
Acq. time 1.300 sec  
Width 24509.8 Hz  
2000 repetitions  
OBSERVE C13, 100.5313468 MHz  
DECOUPLE H1, 399.8082850 MHz  
Power 43 dB  
Continuously on  
WALTZ-16 modulated  
DATA PROCESSING  
Line broadening 1.0 Hz  
FT size 65536  
Total time 1 hr, 50 min, 18 sec

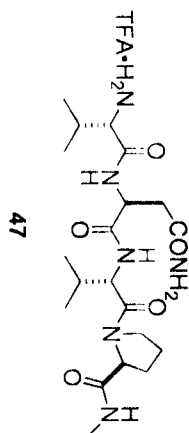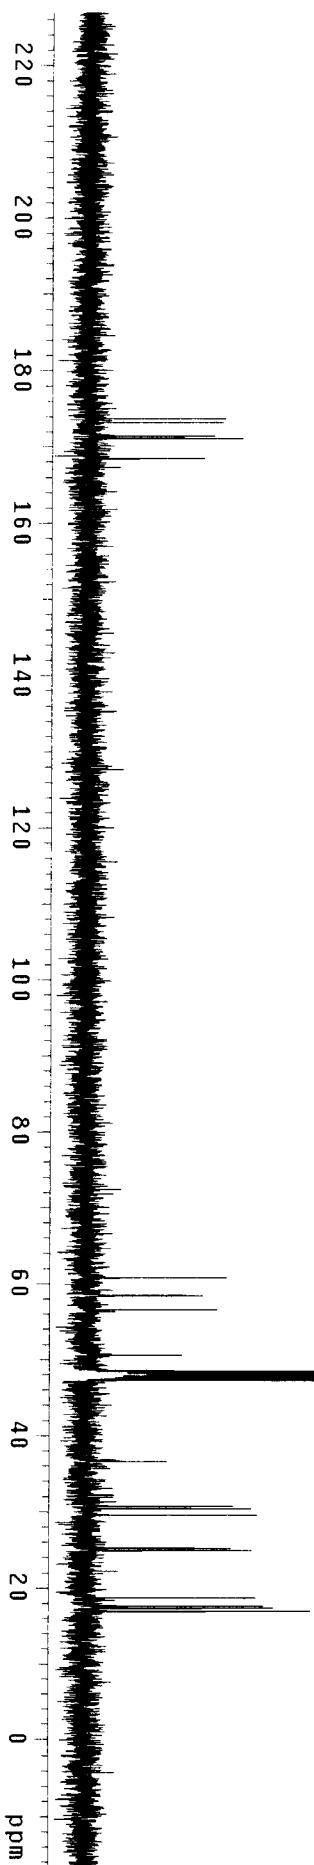

JEDIII-29  
 temp=90c  
 jedIII29\_h1\_90c

expt s2pnt

SAMPLE DEC. & VT  
 date Jan 24 2007 499.869

solvent DMSO dn H1

file ACQUISITION exp H1

sfreq 499.870 dm 0

tn H1 dmm nnn

at 3.996 dmf C

np 73980 dseq 200

sw 9256.0 dres 1.0

fb not used homo n

ls 32 temp 90.0

tpwr 57 PROCESSING 0.10

pw 2.0 wftitle

d1 2.000 proc ft

tof 1124.6 fn not used

nt 64 math f

ct 64 math

alock n

gain 60

flags n

l1 n

in n

dp n

hs y

DISPLAY nm

SP -250.0

WP 5248.5

VS 476

SC 0

WC 250

hzmm 20.99

ts 2734.33

rfl 2256.4

rffp 1244.7

th 1.000

at ph

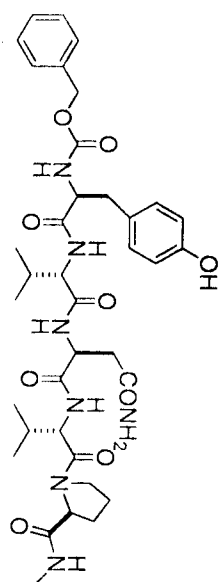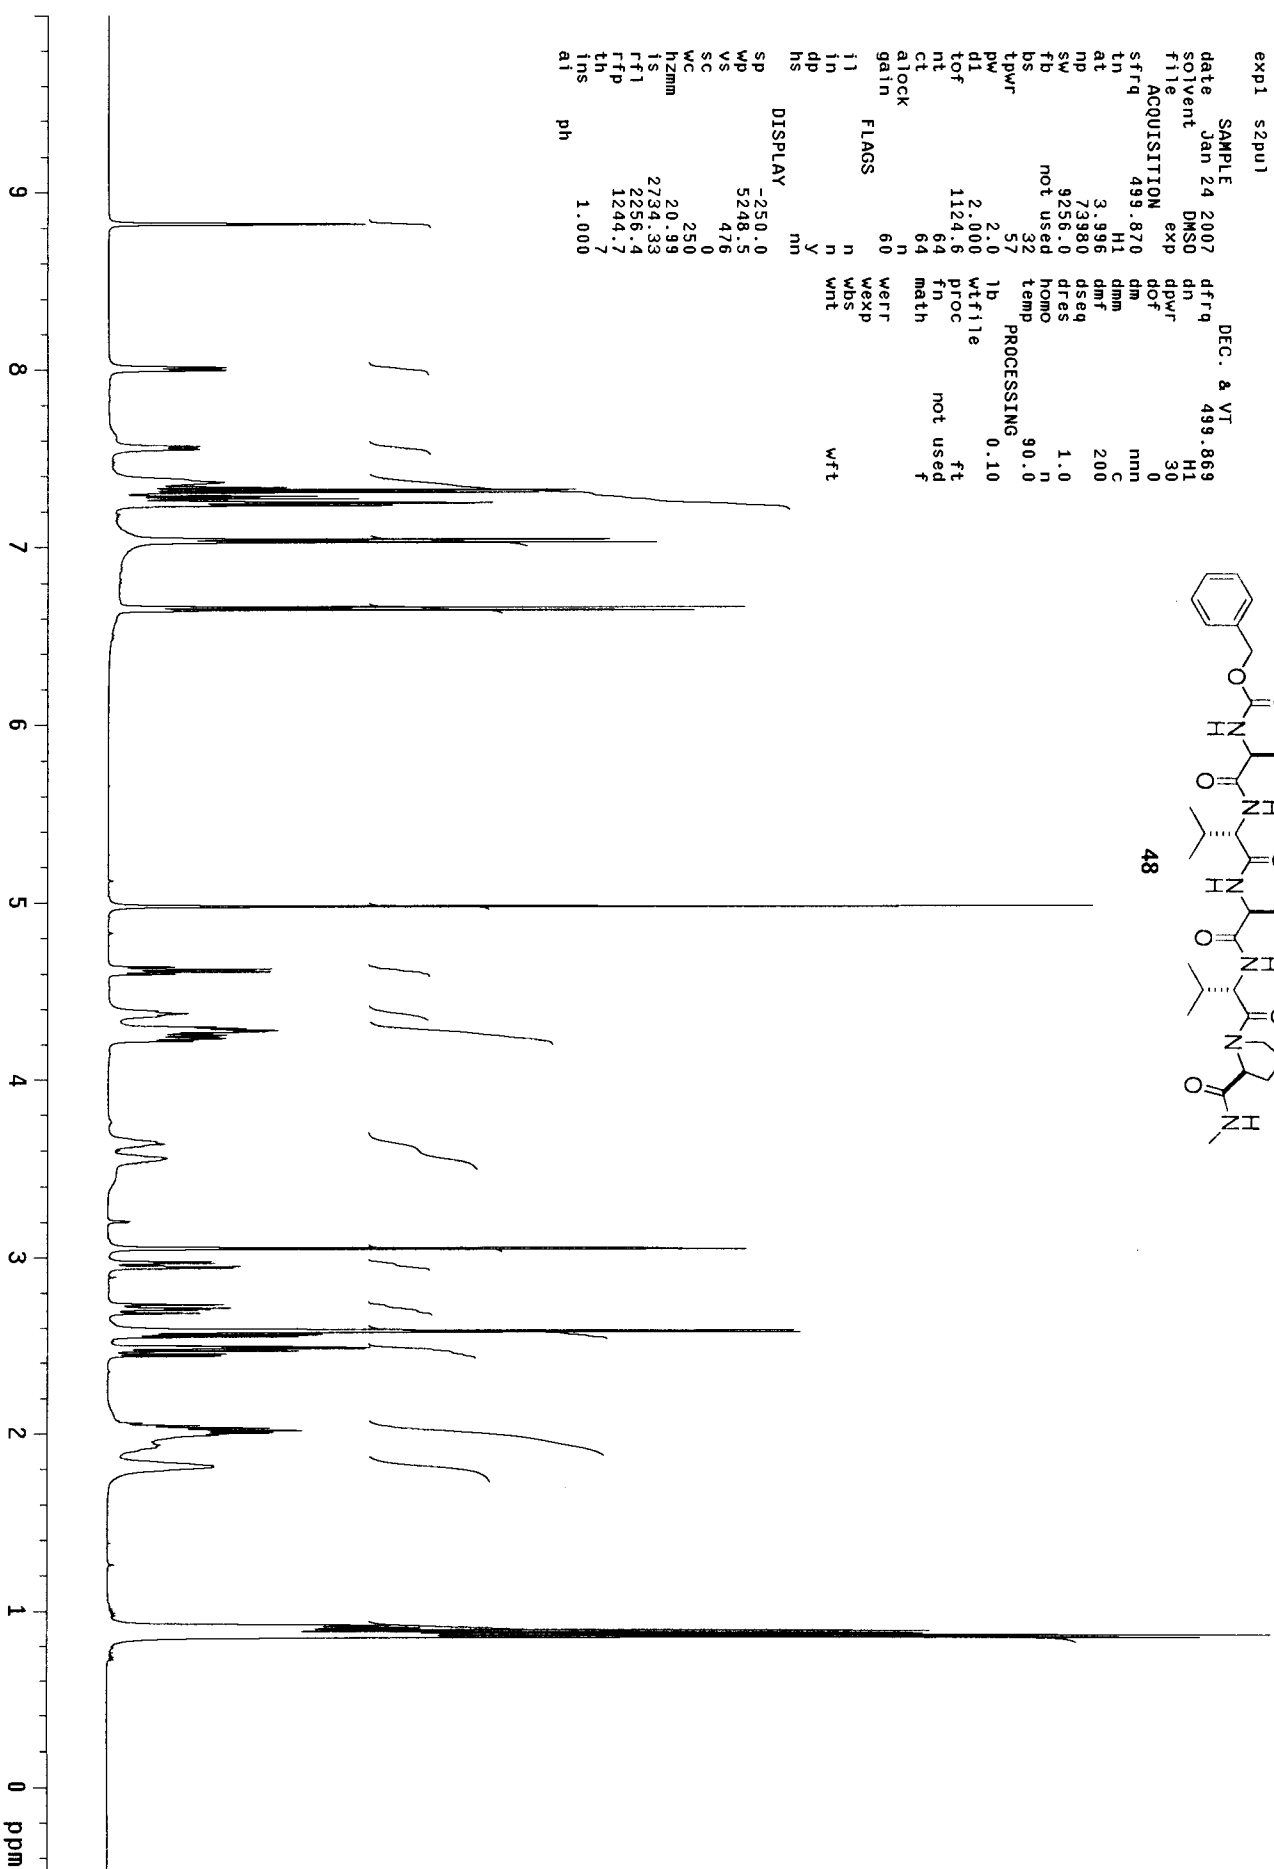



JEDI11-29  
temp=90C  
Jedi1129\_c13\_90C  
exp4 s2pu1

```
SAMPLE      DEC. & VT  
date Jan 24 2007  dfrq 499.869  
solvent DMSO     dn   H1  
f1file exp      dpwr 37  
ACQUISITION dof   0  
sfrq 125.706    dm   YYY  
tn C13          dmm  W  
at 1.279       dmf 10582  
np 85252      dres  
sw 33333.3    dres 1.0  
fb not used    homo n  
bs temp 90.0  temp  n  
tpwr 53        PROCESSING  
pw 3.0         lb 1.00  
d1 2.000      wtfile  
tof 2198.1    proc  ft  
nt 2000       fn  not used  
ct 1516       math  
alock n  
gain 60       werr  
i1 n          wexp  
in n          wbs  
dp Y          wnt  
hs nm  
DISPLAY -628.5  
wp 25766.5  
vs 894  
sc 0  
wc 250  
h2mm 103.07  
is 500.00  
rfl 7635.5  
rfp 4964.8  
th 68  
ins 100.000  
at cdc ph
```

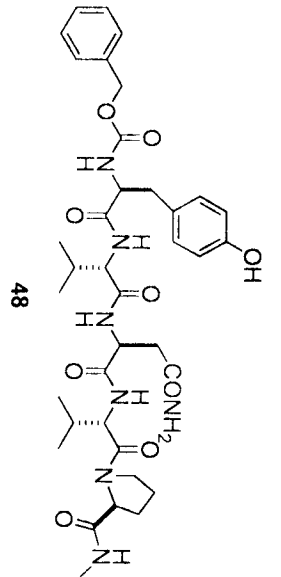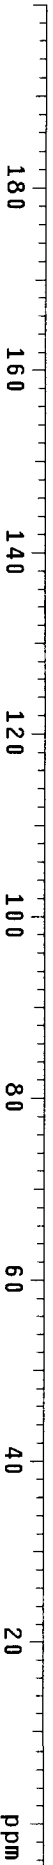

JEDIII(91)-2/1/07

Pulse Sequence: s2pu1

Solvent: CD3OD

Ambient temperature

Mercury-400BB "nmr5"

Relax. delay 2.000 sec

Pulse 18.4 degrees

Acq. time 2.856 sec

Width 5602.2 Hz

24 repetitions

OBSERVE H1, 400.2685554 MHz

DATA PROCESSING

Line broadening 0.1 Hz

FT size 32768

Total time 0 min, 0 sec

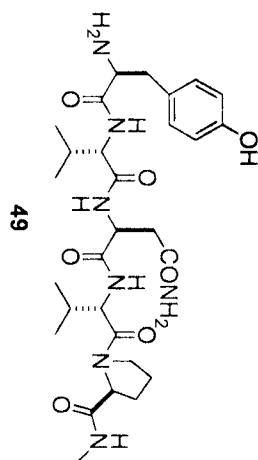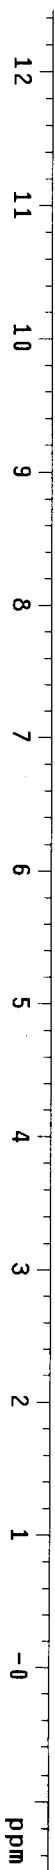

Archive directory:  
Sample directory:

Pulse Sequence: szpul  
Solvent: cd3od  
Temp. 27.0 C / 300.1 K  
User: 1-14-87  
File: martin\_jeds-91\_szpul\_C13  
INOVA-500 "usb"

Relax. delay 2.000 sec  
Pulse 30.0 degrees  
Acq. time 1.300 sec  
Width 24509.8 Hz  
2000 repetitions  
OBSERVE C13, 100.5312305 MHz  
DECUPLE H1, 399.8082860 MHz  
Power 44 dB  
continuously on  
WALTZ-16 modulated  
DATA PROCESSING  
Line Broadening 1.0 Hz  
FT Size 65536  
Total time 1 hr, 50 min, 18 sec

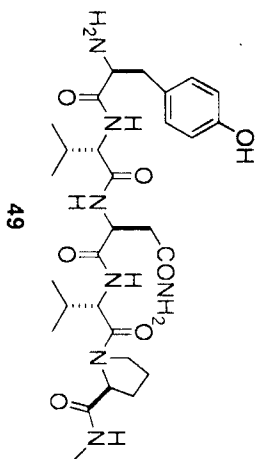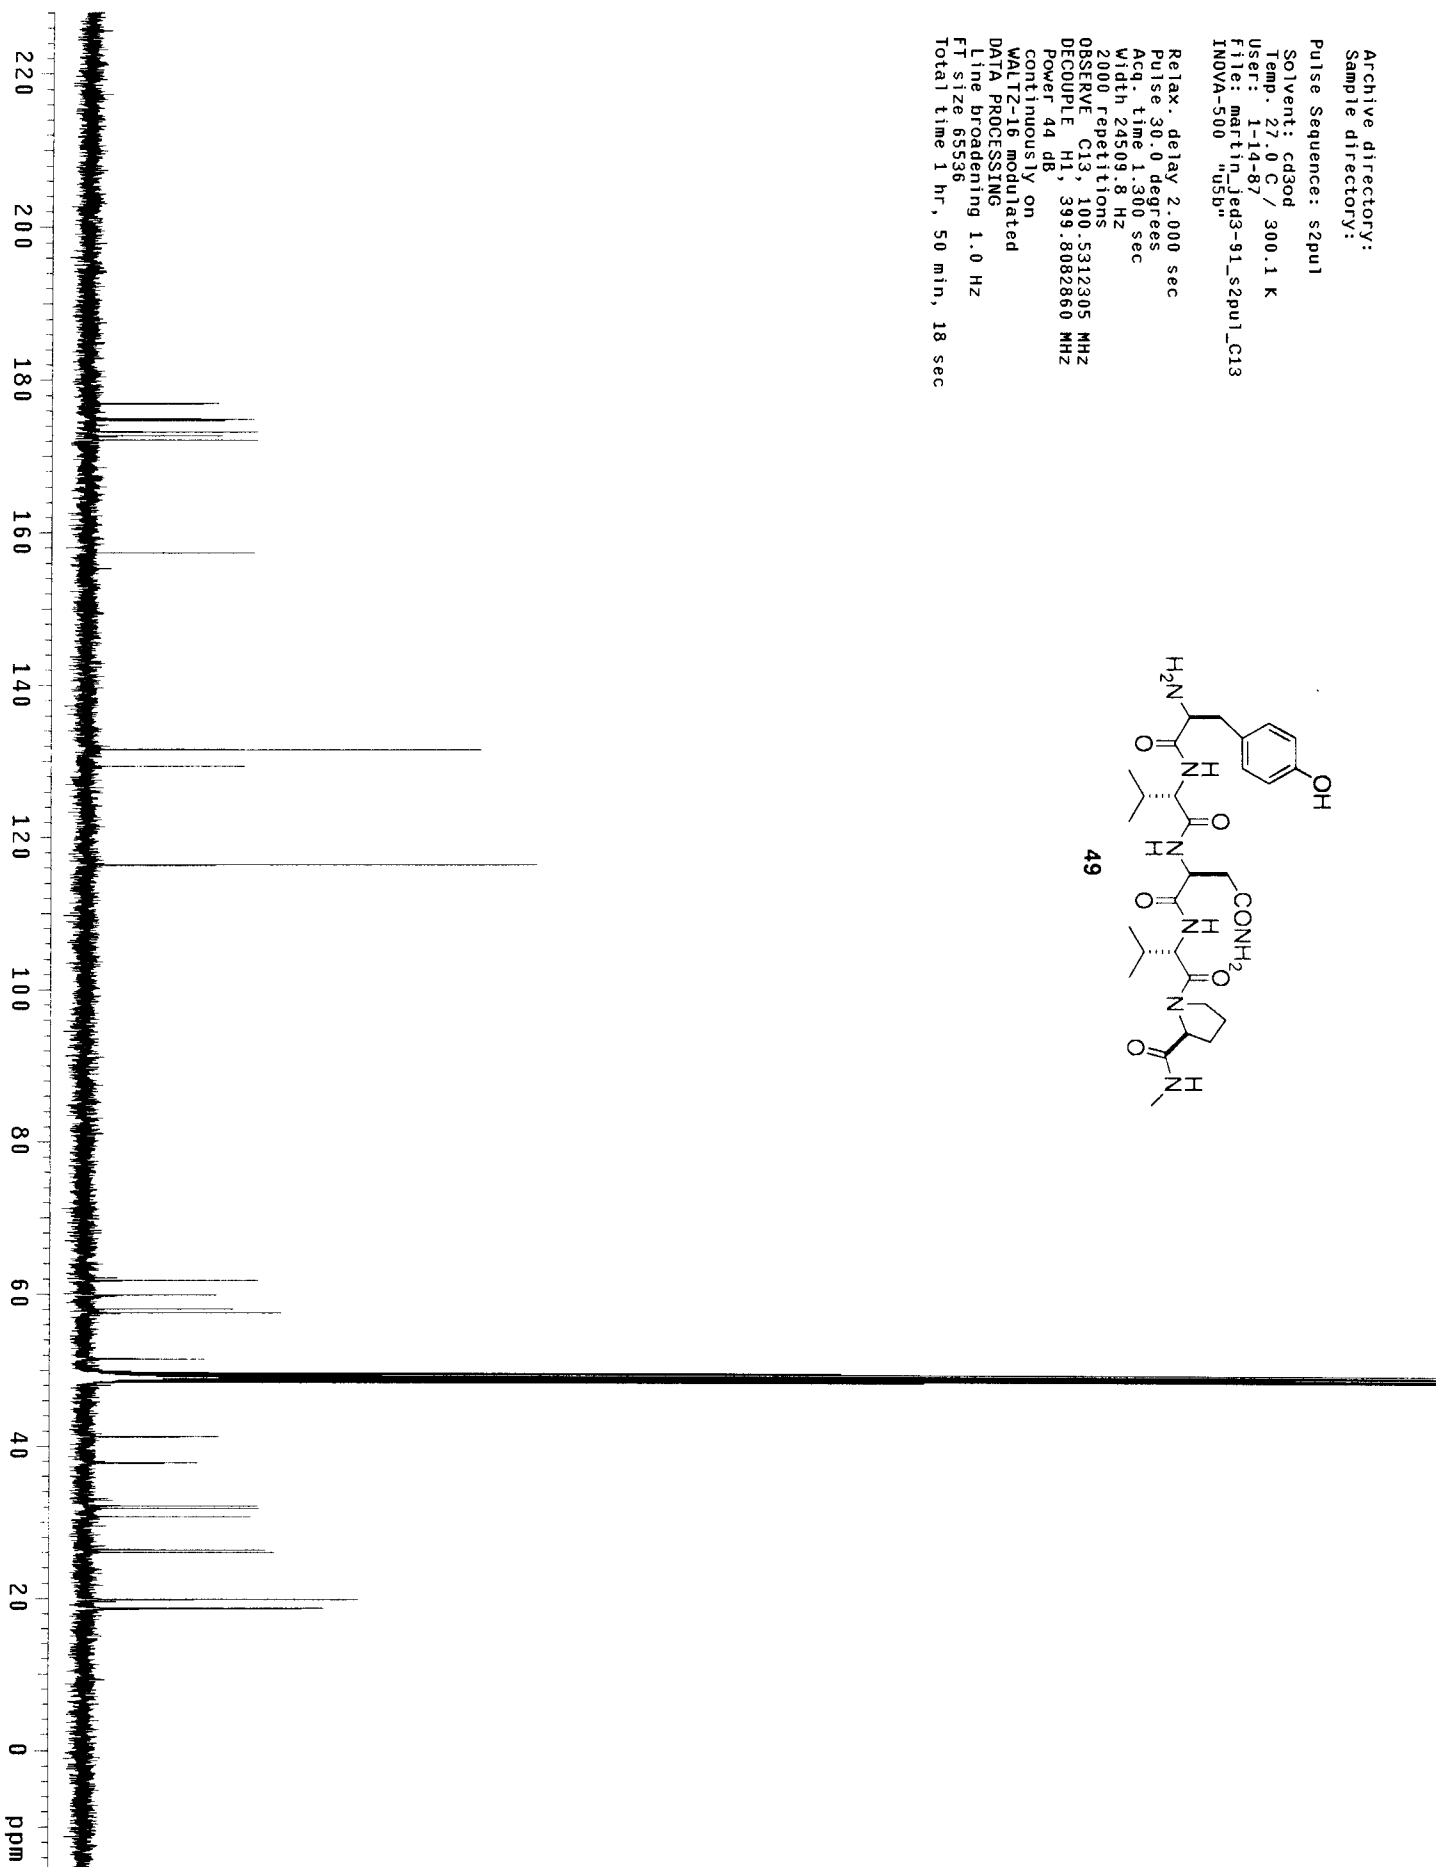

JEDIII-32  
 Temp=130C  
 JedIII32\_h1\_130C  
 exp1 s2pu1

SAMPLE DEC. & VI  
 date Feb 13 2007 499.869  
 solvent DMSO dn H1  
 file ACQUISITION exp H1  
 ACQUISITION 499.870 dm 30  
 sfrq H1 dmf 0  
 tn H1 dmm nmn  
 at 3.996 dmf C  
 np 73980 dseq 200  
 sw 9256.0 dres 1.0  
 fb not used homo n  
 bs temp 130.0  
 tpwr 32  
 pw 37 PROCESSING  
 dl 2.0 lb 0.10  
 tof 2.000 wtfille  
 nt 1124.6 proc ft  
 ct 64 fn not used  
 alock 64 math f  
 gain 30  
 flags n werr  
 il n wexp  
 in n wds  
 dp y wnt  
 hs nm  
 DISPLAY  
 sp -250.0  
 wd 5248.5  
 vs 862  
 sc 0  
 wc 250  
 hzmm 20.99  
 is 5323.76  
 rfp 2256.7  
 th 1244.7  
 ins 7  
 ai 1.000  
 ph

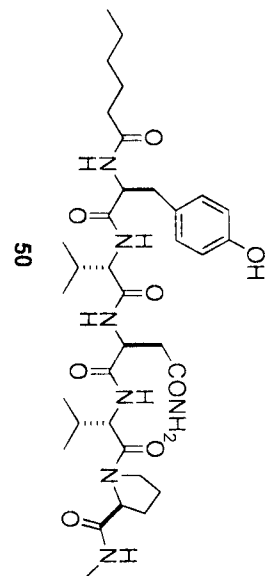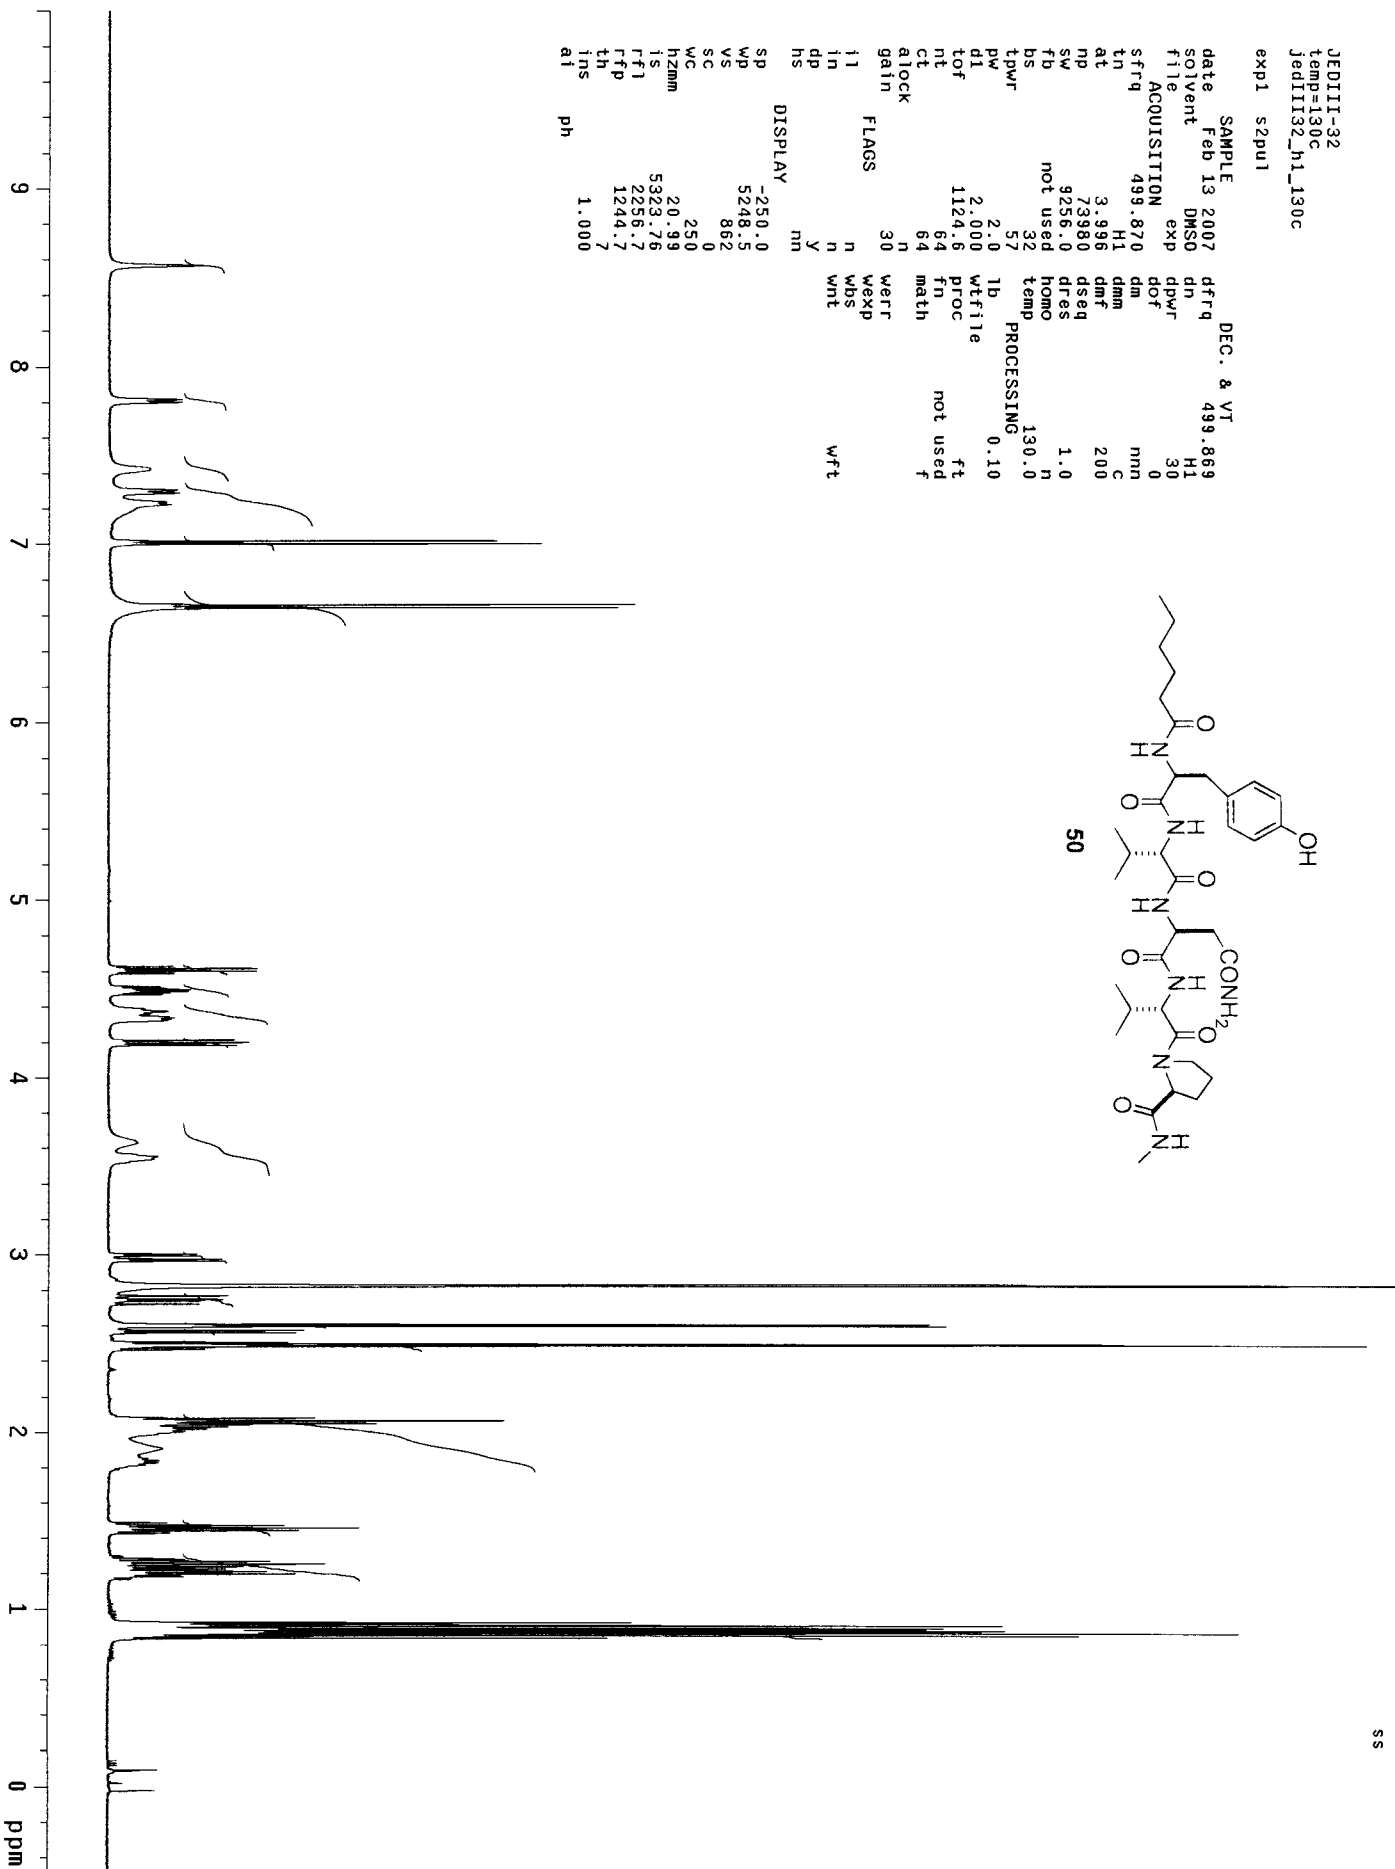

JED111-32  
 Temp=130C  
 Jed11132\_c13\_130c  
 exp4 s2pu1

SAMPLE DEC. & VI  
 date Feb 12 2007 dfrq 499.869  
 solvent DMSO dn H1  
 file ACQUISITION exp dpwr 37  
 ACQUISITION 125.706 dm 0  
 sfrq C13 dmm YYV W  
 tn 1.279 dmf 10582  
 at np 85252 dres 1.0  
 sw 33333.3 homo n  
 fb not used temp 130.0  
 bs 53  
 tpwr 64  
 pw 3.0 lb  
 dl 2.000 wtfile 1.00  
 tof 2198.1 proc ft  
 nt 20000 fn not used  
 ct 20000 math  
 alock n  
 gain 60 werr  
 flags n wexp  
 i1 n wbs  
 in n wnt  
 dp y  
 hs mn  
 DISPLAY  
 sp -628.5  
 wp 25766.5  
 vs 8717  
 sc 0  
 wc 250  
 hzmm 103.07  
 is 500.00  
 rfi 7667.5  
 rfp 4964.8  
 th 68  
 ins 100.000  
 al cdc ph

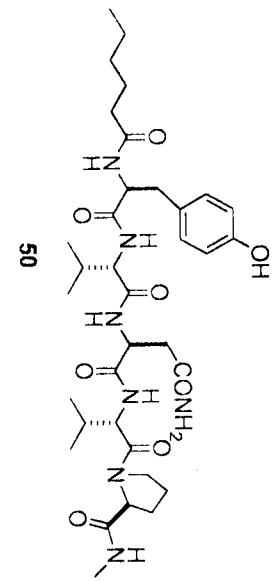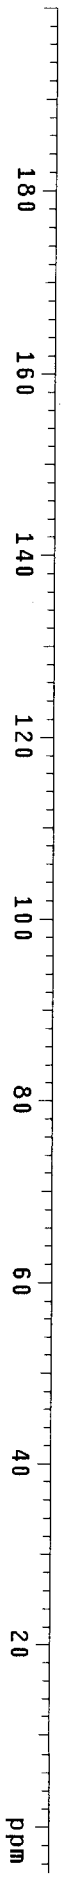

2311mpYUNVP

exptl Presat

|             |         |             |            |        |
|-------------|---------|-------------|------------|--------|
| SAMPLE      | date    | Mar 12 2010 | temp       | 27.0   |
| SOLVENT     | d2o     |             | gain       | 50     |
| FILE        | exp     |             | spn        | 0      |
| ACQUISITION | sw      | 7990.4      | hst        | 0.008  |
|             | at      | 4.005       | pw90       | 15.300 |
|             | np      | 64000       | alfa       | 6.600  |
|             | fb      | 4000        | FLAGS      | n      |
|             | bs      | 32          | l1         | n      |
|             | ss      | 2           | dp         | n      |
|             | d1      | 0.020       | hs         | y      |
|             | ne      | 64          | PROCESsing | nm     |
|             | ct      | 64          | lb         | 0.20   |
|             | fn      |             | fn         | 65536  |
| TRANSMITTER | h1      |             | DISPLAY    |        |
| sfreq       | 499.403 | sp          | -249.7     |        |
| tof         | 499.3   | wd          | 5243.5     |        |
| tpwr        | 55      | rfl         | 998.8      |        |
| pw          | 2.550   | rfp         | 0          |        |
| DECOUPLER   | C13     | fp          | 106.7      |        |
| dh          | 0       | lp          | 9.7        |        |
| dof         | 0       | WC          | 215        |        |
| dmm         | nmn     | SC          | 85         |        |
| dmm         | C       | VS          | 9358       |        |
| dpwr        | 35      | th          | 45         |        |
| dmf         | 32258   | ai          | cdc        | ph     |

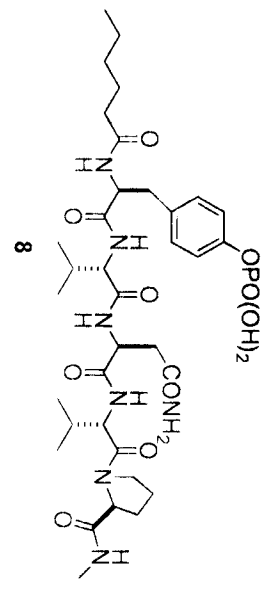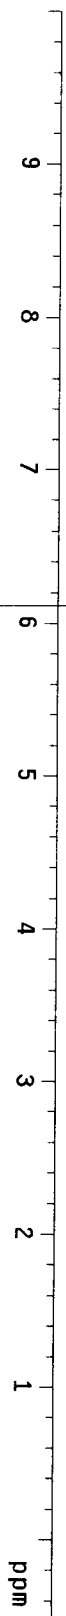

231impYUNVP

exp4 szpu1

|             |         |             |         |        |
|-------------|---------|-------------|---------|--------|
| date        | SAMPLE  | Mar 12 2010 | temp    | 27.0   |
| solvent     | d2o     |             | gain    | 50     |
| file        | exp     |             | spin    | 20     |
| ACQUISITION | hst     |             | hst     | 0.008  |
| sw          | 30143.2 |             | pw90    | 15.500 |
| at          | 1.062   |             | alfa    | 10.000 |
| np          | 64024   |             | FLAGS   |        |
| fb          | 17000   |             | l1      | n      |
| bs          | 64      | in          | dp      | n      |
| ss          | 128     | dp          | hs      | y      |
| di          | 2.000   | hs          | nm      |        |
| nt          | 20000   | PROCESSING  |         |        |
| ct          | 20000   | l1          | 1.00    |        |
| TRANSMITTER | fn      | not used    |         |        |
| tn          | C13     | DISPLAY     |         |        |
| sfrq        | 125.587 | sp          | -628.8  |        |
| tof         | 1254.3  | wp          | 25742.4 |        |
| tpwr        | 51      | rfl         | 1886.3  |        |
| pw          | 8.000   | rff         | 0       |        |
| DECOUPLER   | H1      | fp          | -3.7    |        |
| dn          | 0       | lp          | -219.5  |        |
| dof         |         | PL0T        |         |        |
| dm          | YYY     | wc          | 250     |        |
| dmm         | w       | sc          | 0       |        |
| dpwr        | 39      | vs          | 119850  |        |
| dmf         | 12600   | th          | 19      |        |
|             |         | ai          | cdc     | ph     |

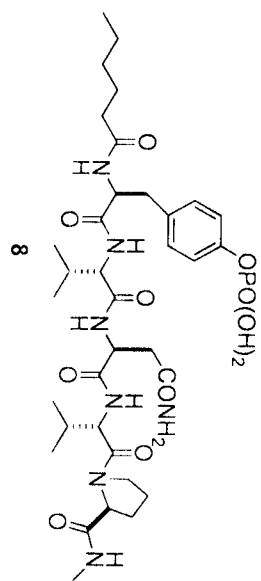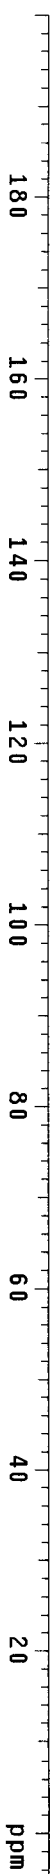

Supplement: ml100142y_si_002.pdf [file ml100142y_si_002.pdf]
